# Supplementary material for: Screen and Character a New Iflavirus Virus in the Fruit Tree Pest Pyrops candelaria
Source: Preprints.org preprint supplement (doi:10.20944/preprints202406.1024.v1), 2024-06-14
Supplement: Supplementary file 1 [file supplementary]

## Sheet: Sheet1
seq	target	contig_len	identity	hit_length	mismatch	gaps	qstart	qend	hstart	hend	evalue	score	info	viral_name	class	family	type
TRINITY_DN221_c0_g2_i1	YP_008130310.1	10916	37.266	1763	906	37	8933	3972	301	1972	0	1035	polyprotein [Nilaparvata lugens honeydew virus-3].	Nilaparvata lugens honeydew virus-3	Viruses;Riboviria;Orthornavirae;Pisuviricota;Pisoniviricetes;Picornavirales;Iflaviridae.	Iflaviridae	ssRNA(+)
TRINITY_DN4658_c0_g1_i19	YP_009173653.1	6132	38.627	1486	829	22	90	4469	19	1447	0	980	DNA-directed RNA polymerase II, subunit RpB1 [Chrysochromulinaericina virus].	Chrysochromulina ericina virus	Viruses;Varidnaviria;Bamfordvirae;Nucleocytoviricota;Megaviricetes;Algavirales;Phycodnaviridae.	Phycodnaviridae	dsDNA
TRINITY_DN4089_c0_g1_i1	YP_010085109.1	6920	23.179	1359	903	44	1688	5611	445	1713	1.14e-45	186	RdRp [Culex phasma-like virus].	Culex phasma-like virus	Viruses;Riboviria;Orthornavirae;Negarnaviricota;Polyploviricotina;Ellioviricetes;Bunyavirales;Phasmaviridae;Orthophasmavirus;Orthophasmavirusculicis.	Phasmaviridae	ssRNA(-)
TRINITY_DN4658_c0_g1_i2	YP_009173653.1	6564	38.635	1333	761	18	987	4898	142	1446	0	896	DNA-directed RNA polymerase II, subunit RpB1 [Chrysochromulinaericina virus].	Chrysochromulina ericina virus	Viruses;Varidnaviria;Bamfordvirae;Nucleocytoviricota;Megaviricetes;Algavirales;Phycodnaviridae.	Phycodnaviridae	dsDNA
TRINITY_DN4658_c0_g1_i3	YP_009173653.1	5348	39.347	1225	696	14	65	3682	250	1446	0	858	DNA-directed RNA polymerase II, subunit RpB1 [Chrysochromulinaericina virus].	Chrysochromulina ericina virus	Viruses;Varidnaviria;Bamfordvirae;Nucleocytoviricota;Megaviricetes;Algavirales;Phycodnaviridae.	Phycodnaviridae	dsDNA
TRINITY_DN5495_c0_g1_i21	YP_008052546.1	3805	40.033	1209	642	27	3699	199	33	1200	0	862	DNA-directed RNA polymerase II subunit RPB2 [Phaeocystis globosavirus].	Phaeocystis globosa virus	Viruses;Varidnaviria;Bamfordvirae;Nucleocytoviricota;Megaviricetes;Algavirales;Phycodnaviridae;Prymnesiovirus.	Phycodnaviridae	dsDNA
TRINITY_DN5495_c0_g1_i25	YP_008052546.1	3805	40.86	1209	632	27	3699	199	33	1200	0	880	DNA-directed RNA polymerase II subunit RPB2 [Phaeocystis globosavirus].	Phaeocystis globosa virus	Viruses;Varidnaviria;Bamfordvirae;Nucleocytoviricota;Megaviricetes;Algavirales;Phycodnaviridae;Prymnesiovirus.	Phycodnaviridae	dsDNA
TRINITY_DN5638_c0_g1_i12	YP_009010708.1	4467	25.459	1198	704	34	202	3537	35	1129	2.13e-82	298	DNA-directed RNA polymerase II subunit RPB2 [Invertebrateiridovirus 25].	Invertebrate iridovirus 25	Viruses;Varidnaviria;Bamfordvirae;Nucleocytoviricota;Megaviricetes;Pimascovirales;Iridoviridae;Betairidovirinae;Chloriridovirus.	Iridoviridae	dsDNA
TRINITY_DN5495_c0_g1_i5	YP_008052546.1	3909	41.688	1197	624	26	3654	199	33	1200	0	880	DNA-directed RNA polymerase II subunit RPB2 [Phaeocystis globosavirus].	Phaeocystis globosa virus	Viruses;Varidnaviria;Bamfordvirae;Nucleocytoviricota;Megaviricetes;Algavirales;Phycodnaviridae;Prymnesiovirus.	Phycodnaviridae	dsDNA
TRINITY_DN5495_c0_g1_i1	YP_008052546.1	3897	41.792	1194	623	26	3642	199	33	1200	0	879	DNA-directed RNA polymerase II subunit RPB2 [Phaeocystis globosavirus].	Phaeocystis globosa virus	Viruses;Varidnaviria;Bamfordvirae;Nucleocytoviricota;Megaviricetes;Algavirales;Phycodnaviridae;Prymnesiovirus.	Phycodnaviridae	dsDNA
TRINITY_DN5573_c0_g1_i13	YP_009001498.1	6527	25.968	1136	695	32	6254	2889	1	1004	1.33e-90	330	ABC transporter [Anomala cuprea entomopoxvirus].	Anomala cuprea entomopoxvirus	Viruses;Varidnaviria;Bamfordvirae;Nucleocytoviricota;Pokkesviricetes;Chitovirales;Poxviridae;Entomopoxvirinae;Alphaentomopoxvirus.	Poxviridae	dsDNA
TRINITY_DN5573_c0_g1_i5	YP_009001498.1	6527	25.88	1136	696	32	6254	2889	1	1004	2.56e-88	323	ABC transporter [Anomala cuprea entomopoxvirus].	Anomala cuprea entomopoxvirus	Viruses;Varidnaviria;Bamfordvirae;Nucleocytoviricota;Pokkesviricetes;Chitovirales;Poxviridae;Entomopoxvirinae;Alphaentomopoxvirus.	Poxviridae	dsDNA
TRINITY_DN441_c1_g1_i9	YP_010796961.1	4857	35.009	1134	619	27	459	3674	107	1184	0	594	PolB [Mayetiola barley midge adintovirus].	Mayetiola barley midge adintovirus	Viruses;Varidnaviria;Bamfordvirae;Preplasmiviricota;Polintoviricetes;Orthopolintovirales;Adintoviridae;Alphadintovirus;Alphadintovirusmayetiola.	Adintoviridae	dsDNA
TRINITY_DN441_c1_g1_i12	YP_010796961.1	5019	34.863	1133	622	26	621	3836	107	1184	0	590	PolB [Mayetiola barley midge adintovirus].	Mayetiola barley midge adintovirus	Viruses;Varidnaviria;Bamfordvirae;Preplasmiviricota;Polintoviricetes;Orthopolintovirales;Adintoviridae;Alphadintovirus;Alphadintovirusmayetiola.	Adintoviridae	dsDNA
TRINITY_DN441_c1_g1_i4	YP_010796961.1	5660	35.075	1129	625	27	621	3836	107	1184	0	593	PolB [Mayetiola barley midge adintovirus].	Mayetiola barley midge adintovirus	Viruses;Varidnaviria;Bamfordvirae;Preplasmiviricota;Polintoviricetes;Orthopolintovirales;Adintoviridae;Alphadintovirus;Alphadintovirusmayetiola.	Adintoviridae	dsDNA
TRINITY_DN441_c1_g1_i6	YP_010796961.1	5498	35.075	1129	625	27	459	3674	107	1184	0	593	PolB [Mayetiola barley midge adintovirus].	Mayetiola barley midge adintovirus	Viruses;Varidnaviria;Bamfordvirae;Preplasmiviricota;Polintoviricetes;Orthopolintovirales;Adintoviridae;Alphadintovirus;Alphadintovirusmayetiola.	Adintoviridae	dsDNA
TRINITY_DN441_c1_g1_i15	YP_010796961.1	5081	34.929	1128	628	26	683	3898	107	1184	0	590	PolB [Mayetiola barley midge adintovirus].	Mayetiola barley midge adintovirus	Viruses;Varidnaviria;Bamfordvirae;Preplasmiviricota;Polintoviricetes;Orthopolintovirales;Adintoviridae;Alphadintovirus;Alphadintovirusmayetiola.	Adintoviridae	dsDNA
TRINITY_DN441_c1_g1_i8	YP_010796961.1	5019	34.929	1128	628	26	621	3836	107	1184	0	590	PolB [Mayetiola barley midge adintovirus].	Mayetiola barley midge adintovirus	Viruses;Varidnaviria;Bamfordvirae;Preplasmiviricota;Polintoviricetes;Orthopolintovirales;Adintoviridae;Alphadintovirus;Alphadintovirusmayetiola.	Adintoviridae	dsDNA
TRINITY_DN5573_c0_g1_i17	YP_009001498.1	6479	25.982	1120	699	30	6206	2889	1	1004	1.31e-92	337	ABC transporter [Anomala cuprea entomopoxvirus].	Anomala cuprea entomopoxvirus	Viruses;Varidnaviria;Bamfordvirae;Nucleocytoviricota;Pokkesviricetes;Chitovirales;Poxviridae;Entomopoxvirinae;Alphaentomopoxvirus.	Poxviridae	dsDNA
TRINITY_DN5573_c0_g1_i6	YP_009001498.1	6430	25.982	1120	699	30	6157	2840	1	1004	1.02e-92	337	ABC transporter [Anomala cuprea entomopoxvirus].	Anomala cuprea entomopoxvirus	Viruses;Varidnaviria;Bamfordvirae;Nucleocytoviricota;Pokkesviricetes;Chitovirales;Poxviridae;Entomopoxvirinae;Alphaentomopoxvirus.	Poxviridae	dsDNA
TRINITY_DN273_c0_g1_i1	YP_009270649.1	12238	26.344	1116	678	37	8793	11933	937	1977	1.13e-76	289	glycoprotein precursor [Wuhan Insect virus 2].	Wuhan Insect virus 2	Viruses;Riboviria;Orthornavirae;Negarnaviricota;Polyploviricotina;Ellioviricetes;Bunyavirales;Phasmaviridae;Wuhivirus;Wuhivirusinsecti.	Phasmaviridae	ssRNA(-)
TRINITY_DN21558_c0_g1_i3	YP_009270649.1	12238	26.344	1116	678	37	3446	306	937	1977	1.13e-76	289	glycoprotein precursor [Wuhan Insect virus 2].	Wuhan Insect virus 2	Viruses;Riboviria;Orthornavirae;Negarnaviricota;Polyploviricotina;Ellioviricetes;Bunyavirales;Phasmaviridae;Wuhivirus;Wuhivirusinsecti.	Phasmaviridae	ssRNA(-)
TRINITY_DN346_c0_g1_i23	YP_010803150.1	3848	36.856	1107	642	25	63	3272	3	1089	0	745	isoleucyl-tRNA synthetase [Fadolivirus algeromassiliense].	Fadolivirus algeromassiliense	Viruses;Varidnaviria;Bamfordvirae;Nucleocytoviricota;Megaviricetes;Imitervirales;Mimiviridae;Klosneuvirinae;Fadolivirus.	Mimiviridae	dsDNA
TRINITY_DN346_c0_g1_i15	YP_010796961.1	5922	38.455	1100	593	21	4006	890	109	1185	0	657	PolB [Mayetiola barley midge adintovirus].	Mayetiola barley midge adintovirus	Viruses;Varidnaviria;Bamfordvirae;Preplasmiviricota;Polintoviricetes;Orthopolintovirales;Adintoviridae;Alphadintovirus;Alphadintovirusmayetiola.	Adintoviridae	dsDNA
TRINITY_DN1241_c0_g1_i8	YP_010796961.1	5049	38.455	1100	593	21	3871	755	109	1185	0	657	PolB [Mayetiola barley midge adintovirus].	Mayetiola barley midge adintovirus	Viruses;Varidnaviria;Bamfordvirae;Preplasmiviricota;Polintoviricetes;Orthopolintovirales;Adintoviridae;Alphadintovirus;Alphadintovirusmayetiola.	Adintoviridae	dsDNA
TRINITY_DN1241_c0_g1_i14	YP_010782239.1	3648	36.688	1093	619	18	3322	83	1	1033	0	630	putative ATP-citrate synthase [Tupanvirus soda lake].	Tupanvirus soda lake	Viruses;Varidnaviria;Bamfordvirae;Nucleocytoviricota;Megaviricetes;Imitervirales;Mimiviridae;Megamimivirinae;Tupanvirus.	Mimiviridae	dsDNA
TRINITY_DN3368_c0_g1_i13	YP_010782239.1	3603	36.688	1093	619	18	3322	83	1	1033	0	631	putative ATP-citrate synthase [Tupanvirus soda lake].	Tupanvirus soda lake	Viruses;Varidnaviria;Bamfordvirae;Nucleocytoviricota;Megaviricetes;Imitervirales;Mimiviridae;Megamimivirinae;Tupanvirus.	Mimiviridae	dsDNA
TRINITY_DN3368_c0_g1_i4	YP_009325819.1	4162	45.247	1052	517	20	364	3507	4	1000	0	883	DNA topoisomerase II large subunit [Only Syngen Nebraska virus 5].	Only Syngen Nebraska virus 5	Viruses;Varidnaviria;Bamfordvirae;Nucleocytoviricota;Megaviricetes;Algavirales;Phycodnaviridae;Chlorovirus.	Phycodnaviridae	dsDNA
TRINITY_DN3368_c0_g1_i14	YP_009325819.1	4111	45.247	1052	517	20	364	3507	4	1000	0	883	DNA topoisomerase II large subunit [Only Syngen Nebraska virus 5].	Only Syngen Nebraska virus 5	Viruses;Varidnaviria;Bamfordvirae;Nucleocytoviricota;Megaviricetes;Algavirales;Phycodnaviridae;Chlorovirus.	Phycodnaviridae	dsDNA
TRINITY_DN3368_c0_g1_i23	YP_009325819.1	3972	45.247	1052	517	20	225	3368	4	1000	0	884	DNA topoisomerase II large subunit [Only Syngen Nebraska virus 5].	Only Syngen Nebraska virus 5	Viruses;Varidnaviria;Bamfordvirae;Nucleocytoviricota;Megaviricetes;Algavirales;Phycodnaviridae;Chlorovirus.	Phycodnaviridae	dsDNA
TRINITY_DN3368_c0_g1_i20	YP_009325819.1	3731	45.247	1052	517	20	364	3507	4	1000	0	883	DNA topoisomerase II large subunit [Only Syngen Nebraska virus 5].	Only Syngen Nebraska virus 5	Viruses;Varidnaviria;Bamfordvirae;Nucleocytoviricota;Megaviricetes;Algavirales;Phycodnaviridae;Chlorovirus.	Phycodnaviridae	dsDNA
TRINITY_DN1787_c5_g1_i3	YP_009325819.1	3867	44.778	1034	512	20	174	3263	22	1000	0	855	DNA topoisomerase II large subunit [Only Syngen Nebraska virus 5].	Only Syngen Nebraska virus 5	Viruses;Varidnaviria;Bamfordvirae;Nucleocytoviricota;Megaviricetes;Algavirales;Phycodnaviridae;Chlorovirus.	Phycodnaviridae	dsDNA
TRINITY_DN21248_c0_g1_i12	YP_009701904.1	3878	34.955	1007	503	25	461	3466	1	860	4.79e-148	473	ATPase [Paramecium bursaria Chlorella virus CVA-1].	Paramecium bursaria Chlorella virus CVA-1	Viruses;Varidnaviria;Bamfordvirae;Nucleocytoviricota;Megaviricetes;Algavirales;Phycodnaviridae;Chlorovirus;ParameciumbursariaChlorellavirusA1.	Phycodnaviridae	dsDNA
TRINITY_DN1241_c0_g1_i4	YP_010803725.1	3729	47.1	1000	503	8	3162	175	2	979	0	942	ubiquitin activating enzyme [Fadolivirus algeromassiliense].	Fadolivirus algeromassiliense	Viruses;Varidnaviria;Bamfordvirae;Nucleocytoviricota;Megaviricetes;Imitervirales;Mimiviridae;Klosneuvirinae;Fadolivirus.	Mimiviridae	dsDNA
TRINITY_DN224002_c0_g1_i1	YP_010782239.1	3714	37.789	995	561	14	3028	83	84	1033	0	612	putative ATP-citrate synthase [Tupanvirus soda lake].	Tupanvirus soda lake	Viruses;Varidnaviria;Bamfordvirae;Nucleocytoviricota;Megaviricetes;Imitervirales;Mimiviridae;Megamimivirinae;Tupanvirus.	Mimiviridae	dsDNA
TRINITY_DN441_c1_g1_i13	YP_010788984.1	3568	24.922	967	546	22	3219	742	25	952	5.3e-83	295	DNA-directed RNA polymerase subunit 1 [Megavirus baoshan].	Megavirus baoshan	Viruses;Varidnaviria;Bamfordvirae;Nucleocytoviricota;Megaviricetes;Imitervirales;Mimiviridae;Megamimivirinae;Megavirus;Megavirusbaoshanense.	Mimiviridae	dsDNA
TRINITY_DN7508_c0_g1_i18	YP_010796961.1	2805	34.959	964	533	23	46	2805	107	1020	3.56e-157	496	PolB [Mayetiola barley midge adintovirus].	Mayetiola barley midge adintovirus	Viruses;Varidnaviria;Bamfordvirae;Preplasmiviricota;Polintoviricetes;Orthopolintovirales;Adintoviridae;Alphadintovirus;Alphadintovirusmayetiola.	Adintoviridae	dsDNA
TRINITY_DN61900_c0_g1_i22	YP_010841540.1	5694	31.818	946	416	21	5390	2730	108	883	1.25e-23	113	collagen-like protein 7 [Cotonvirus japonicus].	Cotonvirus japonicus	Viruses;Varidnaviria;Bamfordvirae;Nucleocytoviricota;Megaviricetes;Imitervirales;Mimiviridae;Megamimivirinae;Cotonvirus;Cotonvirusjaponicum.	Mimiviridae	dsDNA
TRINITY_DN3332_c0_g1_i1	YP_010802960.1	6522	25.742	944	557	22	5716	2939	72	889	1.27e-56	218	hypothetical protein QKU48_gp0077 [Fadolivirus algeromassiliense].	Fadolivirus algeromassiliense	Viruses;Varidnaviria;Bamfordvirae;Nucleocytoviricota;Megaviricetes;Imitervirales;Mimiviridae;Klosneuvirinae;Fadolivirus.	Mimiviridae	dsDNA
TRINITY_DN3332_c0_g1_i3	YP_010803161.1	3719	28.268	941	622	16	542	3280	6	921	3.01e-103	352	peptidase M16 [Fadolivirus algeromassiliense].	Fadolivirus algeromassiliense	Viruses;Varidnaviria;Bamfordvirae;Nucleocytoviricota;Megaviricetes;Imitervirales;Mimiviridae;Klosneuvirinae;Fadolivirus.	Mimiviridae	dsDNA
TRINITY_DN7891_c0_g1_i2	YP_010803161.1	3523	28.268	941	622	16	346	3084	6	921	1.2e-103	352	peptidase M16 [Fadolivirus algeromassiliense].	Fadolivirus algeromassiliense	Viruses;Varidnaviria;Bamfordvirae;Nucleocytoviricota;Megaviricetes;Imitervirales;Mimiviridae;Klosneuvirinae;Fadolivirus.	Mimiviridae	dsDNA
TRINITY_DN583_c23_g1_i1	YP_008130310.1	10916	39.061	937	543	13	3182	405	2243	3162	1.65e-178	623	polyprotein [Nilaparvata lugens honeydew virus-3].	Nilaparvata lugens honeydew virus-3	Viruses;Riboviria;Orthornavirae;Pisuviricota;Pisoniviricetes;Picornavirales;Iflaviridae.	Iflaviridae	ssRNA(+)
TRINITY_DN8544_c0_g2_i2	YP_010803459.1	5797	29.475	933	542	18	1340	4078	337	1173	4.07e-98	353	DNA-directed RNA polymerase subunit 1 [Fadolivirusalgeromassiliense].	Fadolivirus algeromassiliense	Viruses;Varidnaviria;Bamfordvirae;Nucleocytoviricota;Megaviricetes;Imitervirales;Mimiviridae;Klosneuvirinae;Fadolivirus.	Mimiviridae	dsDNA
TRINITY_DN224002_c0_g1_i2	YP_010841540.1	5694	32.139	921	419	17	5390	2730	354	1102	2.31e-35	152	collagen-like protein 7 [Cotonvirus japonicus].	Cotonvirus japonicus	Viruses;Varidnaviria;Bamfordvirae;Nucleocytoviricota;Megaviricetes;Imitervirales;Mimiviridae;Megamimivirinae;Cotonvirus;Cotonvirusjaponicum.	Mimiviridae	dsDNA
TRINITY_DN224002_c0_g1_i12	YP_010803204.1	2964	22.041	921	570	34	239	2614	4	905	8.54e-28	125	DNA mismatch repair protein mutSMSH [Fadolivirusalgeromassiliense].	Fadolivirus algeromassiliense	Viruses;Varidnaviria;Bamfordvirae;Nucleocytoviricota;Megaviricetes;Imitervirales;Mimiviridae;Klosneuvirinae;Fadolivirus.	Mimiviridae	dsDNA
TRINITY_DN4658_c0_g1_i20	YP_009174650.1	3267	35.12	914	508	25	3074	402	20	871	9.56e-147	464	putative DNA polymerase [Yellowstone lake phycodnavirus 2].	Yellowstone lake phycodnavirus 2	Viruses;Varidnaviria;Bamfordvirae;Nucleocytoviricota;Megaviricetes;Algavirales;Phycodnaviridae;Prasinovirus.	Phycodnaviridae	dsDNA
TRINITY_DN61900_c0_g1_i18	YP_008052581.1	4904	34.721	913	534	20	4767	2059	11	871	4.37e-151	505	DNA-directed RNA polymerase II subunit RPB1 [Phaeocystis globosavirus].	Phaeocystis globosa virus	Viruses;Varidnaviria;Bamfordvirae;Nucleocytoviricota;Megaviricetes;Algavirales;Phycodnaviridae;Prymnesiovirus.	Phycodnaviridae	dsDNA
TRINITY_DN61900_c0_g1_i23	YP_008052581.1	4519	34.721	913	534	20	4382	1674	11	871	6e-152	504	DNA-directed RNA polymerase II subunit RPB1 [Phaeocystis globosavirus].	Phaeocystis globosa virus	Viruses;Varidnaviria;Bamfordvirae;Nucleocytoviricota;Megaviricetes;Algavirales;Phycodnaviridae;Prymnesiovirus.	Phycodnaviridae	dsDNA
TRINITY_DN23290_c0_g1_i1	YP_009173653.1	4529	36.344	908	537	11	194	2863	562	1446	8.1e-179	578	DNA-directed RNA polymerase II, subunit RpB1 [Chrysochromulinaericina virus].	Chrysochromulina ericina virus	Viruses;Varidnaviria;Bamfordvirae;Nucleocytoviricota;Megaviricetes;Algavirales;Phycodnaviridae.	Phycodnaviridae	dsDNA
TRINITY_DN23290_c0_g1_i3	YP_010802960.1	6399	26.91	903	557	20	5593	2939	72	889	5.54e-64	241	hypothetical protein QKU48_gp0077 [Fadolivirus algeromassiliense].	Fadolivirus algeromassiliense	Viruses;Varidnaviria;Bamfordvirae;Nucleocytoviricota;Megaviricetes;Imitervirales;Mimiviridae;Klosneuvirinae;Fadolivirus.	Mimiviridae	dsDNA
TRINITY_DN224002_c0_g1_i6	YP_010802960.1	6241	26.91	903	557	20	5593	2939	72	889	5.32e-64	241	hypothetical protein QKU48_gp0077 [Fadolivirus algeromassiliense].	Fadolivirus algeromassiliense	Viruses;Varidnaviria;Bamfordvirae;Nucleocytoviricota;Megaviricetes;Imitervirales;Mimiviridae;Klosneuvirinae;Fadolivirus.	Mimiviridae	dsDNA
TRINITY_DN96198_c0_g1_i11	YP_010781461.1	3276	25.53	897	570	24	501	3092	5	836	1.57e-67	247	aminopeptidase M1-like [Tupanvirus soda lake].	Tupanvirus soda lake	Viruses;Varidnaviria;Bamfordvirae;Nucleocytoviricota;Megaviricetes;Imitervirales;Mimiviridae;Megamimivirinae;Tupanvirus.	Mimiviridae	dsDNA
TRINITY_DN2030_c0_g1_i1	YP_010781461.1	3218	25.251	895	575	23	443	3034	5	836	9.81e-68	247	aminopeptidase M1-like [Tupanvirus soda lake].	Tupanvirus soda lake	Viruses;Varidnaviria;Bamfordvirae;Nucleocytoviricota;Megaviricetes;Imitervirales;Mimiviridae;Megamimivirinae;Tupanvirus.	Mimiviridae	dsDNA
TRINITY_DN8544_c0_g2_i12	YP_010841540.1	5694	32.584	890	367	17	5369	2730	331	997	4.11e-33	144	collagen-like protein 7 [Cotonvirus japonicus].	Cotonvirus japonicus	Viruses;Varidnaviria;Bamfordvirae;Nucleocytoviricota;Megaviricetes;Imitervirales;Mimiviridae;Megamimivirinae;Cotonvirus;Cotonvirusjaponicum.	Mimiviridae	dsDNA
TRINITY_DN565_c0_g1_i1	YP_010783546.1	2796	32.207	888	533	19	2704	68	1	828	2.99e-141	460	DNA-directed RNA polymerase II subunit Rpb1 [Tetraselmis virus 1].	Tetraselmis virus 1	Viruses;Varidnaviria;Bamfordvirae;Nucleocytoviricota;Megaviricetes;Imitervirales;Allomimiviridae;Oceanusvirus;Oceanusviruskaneohense.	Allomimiviridae	dsDNA
TRINITY_DN5638_c0_g1_i6	NP_955606.1	3409	35.062	887	465	18	2786	246	46	861	1.64e-159	499	FBS [Fujinami sarcoma virus]	Fujinami sarcoma virus	Viruses; Riboviria; Pararnavirae; Artverviricota; Revtraviricetes; Ortervirales; Retroviridae; Orthoretrovirinae; Alpharetrovirus.	Retroviridae	ss-RNA
TRINITY_DN8544_c0_g2_i11	YP_010781461.1	3262	23.138	886	553	37	235	2802	5	792	3.04e-27	123	aminopeptidase M1-like [Tupanvirus soda lake].	Tupanvirus soda lake	Viruses;Varidnaviria;Bamfordvirae;Nucleocytoviricota;Megaviricetes;Imitervirales;Mimiviridae;Megamimivirinae;Tupanvirus.	Mimiviridae	dsDNA
TRINITY_DN182_c7_g1_i2	YP_009174732.1	3639	35.973	884	489	22	3074	474	20	843	2.44e-145	463	putative DNA polymerase [Yellowstone lake phycodnavirus 1].	Yellowstone lake phycodnavirus 1	Viruses;Varidnaviria;Bamfordvirae;Nucleocytoviricota;Megaviricetes;Algavirales;Phycodnaviridae;Prasinovirus.	Phycodnaviridae	dsDNA
TRINITY_DN182_c7_g1_i7	YP_009448535.1	3247	32.729	883	497	20	463	3078	49	845	4.42e-116	388	Isoleucyl-tRNA synthetase [Orpheovirus IHUMI-LCC2].	Orpheovirus IHUMI-LCC2	Viruses;Varidnaviria;Bamfordvirae;Nucleocytoviricota;Megaviricetes;Algavirales;Phycodnaviridae.	Phycodnaviridae	dsDNA
TRINITY_DN182_c7_g1_i1	YP_010783644.1	4592	27.438	882	515	25	1224	3659	342	1168	2.47e-69	259	DNA-directed RNA polymerase II subunit Rpb2 [Tetraselmis virus 1].	Tetraselmis virus 1	Viruses;Varidnaviria;Bamfordvirae;Nucleocytoviricota;Megaviricetes;Imitervirales;Allomimiviridae;Oceanusvirus;Oceanusviruskaneohense.	Allomimiviridae	dsDNA
TRINITY_DN182_c7_g1_i5	YP_004061851.1	3250	34.447	868	481	26	2685	214	19	842	2.73e-134	434	hypothetical protein OlV1_219 [Ostreococcus lucimarinus virus 1].	Ostreococcus lucimarinus virus 1	Viruses;Varidnaviria;Bamfordvirae;Nucleocytoviricota;Megaviricetes;Algavirales;Phycodnaviridae;Prasinovirus.	Phycodnaviridae	dsDNA
TRINITY_DN224002_c0_g1_i19	YP_010803626.1	3980	22.997	861	564	25	3520	1007	14	798	2.09e-36	153	P-type ATPase subfamily IV [Fadolivirus algeromassiliense].	Fadolivirus algeromassiliense	Viruses;Varidnaviria;Bamfordvirae;Nucleocytoviricota;Megaviricetes;Imitervirales;Mimiviridae;Klosneuvirinae;Fadolivirus.	Mimiviridae	dsDNA
TRINITY_DN35432_c0_g1_i5	YP_010803626.1	3680	22.997	861	564	25	3220	707	14	798	1.37e-36	153	P-type ATPase subfamily IV [Fadolivirus algeromassiliense].	Fadolivirus algeromassiliense	Viruses;Varidnaviria;Bamfordvirae;Nucleocytoviricota;Megaviricetes;Imitervirales;Mimiviridae;Klosneuvirinae;Fadolivirus.	Mimiviridae	dsDNA
TRINITY_DN96198_c0_g1_i1	YP_010803626.1	3640	22.997	861	564	25	3180	667	14	798	1.54e-36	153	P-type ATPase subfamily IV [Fadolivirus algeromassiliense].	Fadolivirus algeromassiliense	Viruses;Varidnaviria;Bamfordvirae;Nucleocytoviricota;Megaviricetes;Imitervirales;Mimiviridae;Klosneuvirinae;Fadolivirus.	Mimiviridae	dsDNA
TRINITY_DN48589_c0_g1_i17	YP_010803626.1	3624	22.997	861	564	25	3164	651	14	798	1.72e-36	153	P-type ATPase subfamily IV [Fadolivirus algeromassiliense].	Fadolivirus algeromassiliense	Viruses;Varidnaviria;Bamfordvirae;Nucleocytoviricota;Megaviricetes;Imitervirales;Mimiviridae;Klosneuvirinae;Fadolivirus.	Mimiviridae	dsDNA
TRINITY_DN48589_c0_g1_i14	YP_010788984.1	3149	25.671	857	482	17	2889	742	110	952	4.12e-80	285	DNA-directed RNA polymerase subunit 1 [Megavirus baoshan].	Megavirus baoshan	Viruses;Varidnaviria;Bamfordvirae;Nucleocytoviricota;Megaviricetes;Imitervirales;Mimiviridae;Megamimivirinae;Megavirus;Megavirusbaoshanense.	Mimiviridae	dsDNA
TRINITY_DN565_c0_g1_i2	YP_007354261.1	3416	26.901	855	488	38	3034	737	15	821	6.83e-58	221	isoleucyl-tRNA synthetase [Acanthamoeba polyphaga moumouvirus].	Acanthamoeba polyphaga moumouvirus	Viruses;Varidnaviria;Bamfordvirae;Nucleocytoviricota;Megaviricetes;Imitervirales;Mimiviridae;Megamimivirinae;Moumouvirus.	Mimiviridae	dsDNA
TRINITY_DN96198_c0_g1_i5	NP_955606.1	3393	34.467	853	448	18	2770	332	46	827	8.43e-144	457	FBS [Fujinami sarcoma virus]	Fujinami sarcoma virus	Viruses; Riboviria; Pararnavirae; Artverviricota; Revtraviricetes; Ortervirales; Retroviridae; Orthoretrovirinae; Alpharetrovirus.	Retroviridae	ss-RNA
TRINITY_DN98143_c2_g1_i2	YP_009388574.1	4471	26.415	848	497	29	1950	4259	515	1313	5.3e-59	227	tegument protein G75 [Common bottlenose dolphin gammaherpesvirus 1strain Sarasota].	Common bottlenose dolphin gammaherpesvirus 1 strain Sarasota	Viruses;Duplodnaviria;Heunggongvirae;Peploviricota;Herviviricetes;Herpesvirales;Orthoherpesviridae;Gammaherpesvirinae;Bossavirus;Bossavirusdelphinidgamma1.	Orthoherpesviridae	dsDNA
TRINITY_DN2749_c0_g1_i4	YP_009388574.1	3238	26.415	848	497	29	717	3026	515	1313	1.16e-59	227	tegument protein G75 [Common bottlenose dolphin gammaherpesvirus 1strain Sarasota].	Common bottlenose dolphin gammaherpesvirus 1 strain Sarasota	Viruses;Duplodnaviria;Heunggongvirae;Peploviricota;Herviviricetes;Herpesvirales;Orthoherpesviridae;Gammaherpesvirinae;Bossavirus;Bossavirusdelphinidgamma1.	Orthoherpesviridae	dsDNA
TRINITY_DN2749_c0_g1_i1	YP_009448535.1	2724	33.176	847	472	18	42	2555	84	845	4.35e-115	380	Isoleucyl-tRNA synthetase [Orpheovirus IHUMI-LCC2].	Orpheovirus IHUMI-LCC2	Viruses;Varidnaviria;Bamfordvirae;Nucleocytoviricota;Megaviricetes;Algavirales;Phycodnaviridae.	Phycodnaviridae	dsDNA
TRINITY_DN2749_c0_g1_i2	NP_955606.1	3286	36.525	846	467	16	2663	246	46	861	8.98e-165	511	FBS [Fujinami sarcoma virus]	Fujinami sarcoma virus	Viruses; Riboviria; Pararnavirae; Artverviricota; Revtraviricetes; Ortervirales; Retroviridae; Orthoretrovirinae; Alpharetrovirus.	Retroviridae	ss-RNA
TRINITY_DN27729_c0_g1_i3	YP_010803532.1	3276	35.919	838	506	14	2813	318	5	817	0	556	eukaryotic translation elongation factor 2 [Fadolivirusalgeromassiliense].	Fadolivirus algeromassiliense	Viruses;Varidnaviria;Bamfordvirae;Nucleocytoviricota;Megaviricetes;Imitervirales;Mimiviridae;Klosneuvirinae;Fadolivirus.	Mimiviridae	dsDNA
TRINITY_DN27729_c0_g1_i4	YP_009553211.1	8657	41.219	837	467	15	5028	2539	1020	1838	6.98e-178	603	polyprotein [Sogatella furcifera hepe-like virus].	Sogatella furcifera hepe-like virus	Viruses;Riboviria;Orthornavirae;Kitrinoviricota;Alsuviricetes;Hepelivirales;Hepeviridae.	Hepeviridae	ssRNA(+)
TRINITY_DN27729_c0_g1_i9	YP_009553211.1	8367	41.219	837	467	15	4738	2249	1020	1838	4.61e-178	603	polyprotein [Sogatella furcifera hepe-like virus].	Sogatella furcifera hepe-like virus	Viruses;Riboviria;Orthornavirae;Kitrinoviricota;Alsuviricetes;Hepelivirales;Hepeviridae.	Hepeviridae	ssRNA(+)
TRINITY_DN27729_c0_g1_i10	YP_009553211.1	8367	41.219	837	467	15	4738	2249	1020	1838	4.61e-178	603	polyprotein [Sogatella furcifera hepe-like virus].	Sogatella furcifera hepe-like virus	Viruses;Riboviria;Orthornavirae;Kitrinoviricota;Alsuviricetes;Hepelivirales;Hepeviridae.	Hepeviridae	ssRNA(+)
TRINITY_DN75840_c0_g4_i1	YP_010803626.1	5006	22.847	836	466	27	3777	1336	68	746	8.25e-33	142	P-type ATPase subfamily IV [Fadolivirus algeromassiliense].	Fadolivirus algeromassiliense	Viruses;Varidnaviria;Bamfordvirae;Nucleocytoviricota;Megaviricetes;Imitervirales;Mimiviridae;Klosneuvirinae;Fadolivirus.	Mimiviridae	dsDNA
TRINITY_DN5674_c0_g1_i6	YP_010803626.1	4501	22.847	836	466	27	3777	1336	68	746	3.07e-33	143	P-type ATPase subfamily IV [Fadolivirus algeromassiliense].	Fadolivirus algeromassiliense	Viruses;Varidnaviria;Bamfordvirae;Nucleocytoviricota;Megaviricetes;Imitervirales;Mimiviridae;Klosneuvirinae;Fadolivirus.	Mimiviridae	dsDNA
TRINITY_DN5674_c0_g1_i1	YP_010803626.1	4205	22.847	836	466	27	3777	1336	68	746	2.66e-33	143	P-type ATPase subfamily IV [Fadolivirus algeromassiliense].	Fadolivirus algeromassiliense	Viruses;Varidnaviria;Bamfordvirae;Nucleocytoviricota;Megaviricetes;Imitervirales;Mimiviridae;Klosneuvirinae;Fadolivirus.	Mimiviridae	dsDNA
TRINITY_DN5495_c0_g1_i12	YP_010803626.1	3911	22.847	836	466	27	3483	1042	68	746	2.33e-33	143	P-type ATPase subfamily IV [Fadolivirus algeromassiliense].	Fadolivirus algeromassiliense	Viruses;Varidnaviria;Bamfordvirae;Nucleocytoviricota;Megaviricetes;Imitervirales;Mimiviridae;Klosneuvirinae;Fadolivirus.	Mimiviridae	dsDNA
TRINITY_DN29106_c0_g1_i24	YP_010841621.1	4893	27.338	834	522	23	3461	1173	14	834	9.77e-89	318	isoleucyl-tRNA synthetase [Cotonvirus japonicus].	Cotonvirus japonicus	Viruses;Varidnaviria;Bamfordvirae;Nucleocytoviricota;Megaviricetes;Imitervirales;Mimiviridae;Megamimivirinae;Cotonvirus;Cotonvirusjaponicum.	Mimiviridae	dsDNA
TRINITY_DN1725_c0_g1_i3	YP_010803532.1	3612	54.087	832	357	8	223	2703	8	819	0	866	eukaryotic translation elongation factor 2 [Fadolivirusalgeromassiliense].	Fadolivirus algeromassiliense	Viruses;Varidnaviria;Bamfordvirae;Nucleocytoviricota;Megaviricetes;Imitervirales;Mimiviridae;Klosneuvirinae;Fadolivirus.	Mimiviridae	dsDNA
TRINITY_DN1725_c0_g1_i10	YP_010803532.1	3564	54.087	832	357	8	175	2655	8	819	0	867	eukaryotic translation elongation factor 2 [Fadolivirusalgeromassiliense].	Fadolivirus algeromassiliense	Viruses;Varidnaviria;Bamfordvirae;Nucleocytoviricota;Megaviricetes;Imitervirales;Mimiviridae;Klosneuvirinae;Fadolivirus.	Mimiviridae	dsDNA
TRINITY_DN1725_c0_g1_i1	YP_008052546.1	2790	44.928	828	422	13	2622	199	387	1200	0	713	DNA-directed RNA polymerase II subunit RPB2 [Phaeocystis globosavirus].	Phaeocystis globosa virus	Viruses;Varidnaviria;Bamfordvirae;Nucleocytoviricota;Megaviricetes;Algavirales;Phycodnaviridae;Prymnesiovirus.	Phycodnaviridae	dsDNA
TRINITY_DN28039_c0_g1_i1	YP_001498866.1	5317	20.631	824	499	26	747	3119	28	729	2.79e-11	72.4	ATPase [Paramecium bursaria Chlorella virus AR158].	Paramecium bursaria Chlorella virus AR158	Viruses;Varidnaviria;Bamfordvirae;Nucleocytoviricota;Megaviricetes;Algavirales;Phycodnaviridae;Chlorovirus.	Phycodnaviridae	dsDNA
TRINITY_DN362_c5_g1_i2	YP_009325865.1	4270	29.562	822	473	21	869	3322	19	738	2.05e-83	296	ATPase [Only Syngen Nebraska virus 5].	Only Syngen Nebraska virus 5	Viruses;Varidnaviria;Bamfordvirae;Nucleocytoviricota;Megaviricetes;Algavirales;Phycodnaviridae;Chlorovirus.	Phycodnaviridae	dsDNA
TRINITY_DN362_c5_g1_i5	YP_009325865.1	3953	29.562	822	473	21	869	3322	19	738	1.59e-83	296	ATPase [Only Syngen Nebraska virus 5].	Only Syngen Nebraska virus 5	Viruses;Varidnaviria;Bamfordvirae;Nucleocytoviricota;Megaviricetes;Algavirales;Phycodnaviridae;Chlorovirus.	Phycodnaviridae	dsDNA
TRINITY_DN362_c5_g1_i7	YP_009325865.1	3915	29.562	822	473	21	514	2967	19	738	1.16e-83	296	ATPase [Only Syngen Nebraska virus 5].	Only Syngen Nebraska virus 5	Viruses;Varidnaviria;Bamfordvirae;Nucleocytoviricota;Megaviricetes;Algavirales;Phycodnaviridae;Chlorovirus.	Phycodnaviridae	dsDNA
TRINITY_DN1725_c0_g1_i9	YP_010803676.1	5365	35.775	819	442	13	2209	4659	1	737	7.2e-170	538	valyl-tRNA synthetase [Fadolivirus algeromassiliense].	Fadolivirus algeromassiliense	Viruses;Varidnaviria;Bamfordvirae;Nucleocytoviricota;Megaviricetes;Imitervirales;Mimiviridae;Klosneuvirinae;Fadolivirus.	Mimiviridae	dsDNA
TRINITY_DN66784_c0_g2_i3	YP_009325865.1	5530	28.606	818	454	28	5119	2753	19	735	1.25e-63	238	ATPase [Only Syngen Nebraska virus 5].	Only Syngen Nebraska virus 5	Viruses;Varidnaviria;Bamfordvirae;Nucleocytoviricota;Megaviricetes;Algavirales;Phycodnaviridae;Chlorovirus.	Phycodnaviridae	dsDNA
TRINITY_DN66784_c0_g2_i8	YP_009325865.1	5530	28.606	818	454	28	5119	2753	19	735	1.25e-63	238	ATPase [Only Syngen Nebraska virus 5].	Only Syngen Nebraska virus 5	Viruses;Varidnaviria;Bamfordvirae;Nucleocytoviricota;Megaviricetes;Algavirales;Phycodnaviridae;Chlorovirus.	Phycodnaviridae	dsDNA
TRINITY_DN21558_c0_g1_i2	YP_009325865.1	3987	28.834	815	456	28	3654	1288	19	735	6.68e-64	238	ATPase [Only Syngen Nebraska virus 5].	Only Syngen Nebraska virus 5	Viruses;Varidnaviria;Bamfordvirae;Nucleocytoviricota;Megaviricetes;Algavirales;Phycodnaviridae;Chlorovirus.	Phycodnaviridae	dsDNA
TRINITY_DN95050_c0_g1_i3	YP_009325865.1	3598	29.73	814	466	21	538	2967	27	738	3.41e-84	296	ATPase [Only Syngen Nebraska virus 5].	Only Syngen Nebraska virus 5	Viruses;Varidnaviria;Bamfordvirae;Nucleocytoviricota;Megaviricetes;Algavirales;Phycodnaviridae;Chlorovirus.	Phycodnaviridae	dsDNA
TRINITY_DN7656_c0_g1_i19	YP_010803532.1	2766	24.307	794	468	26	282	2318	9	784	4.4e-34	144	eukaryotic translation elongation factor 2 [Fadolivirusalgeromassiliense].	Fadolivirus algeromassiliense	Viruses;Varidnaviria;Bamfordvirae;Nucleocytoviricota;Megaviricetes;Imitervirales;Mimiviridae;Klosneuvirinae;Fadolivirus.	Mimiviridae	dsDNA
TRINITY_DN346_c0_g1_i22	YP_010803532.1	2642	24.307	794	468	26	282	2318	9	784	3.86e-34	144	eukaryotic translation elongation factor 2 [Fadolivirusalgeromassiliense].	Fadolivirus algeromassiliense	Viruses;Varidnaviria;Bamfordvirae;Nucleocytoviricota;Megaviricetes;Imitervirales;Mimiviridae;Klosneuvirinae;Fadolivirus.	Mimiviridae	dsDNA
TRINITY_DN3791_c0_g1_i5	YP_010803150.1	3459	41.466	791	428	18	3	2297	149	930	0	618	isoleucyl-tRNA synthetase [Fadolivirus algeromassiliense].	Fadolivirus algeromassiliense	Viruses;Varidnaviria;Bamfordvirae;Nucleocytoviricota;Megaviricetes;Imitervirales;Mimiviridae;Klosneuvirinae;Fadolivirus.	Mimiviridae	dsDNA
TRINITY_DN3791_c0_g1_i29	YP_009701904.1	4046	29.315	788	449	25	3163	851	45	741	4.53e-72	263	ATPase [Paramecium bursaria Chlorella virus CVA-1].	Paramecium bursaria Chlorella virus CVA-1	Viruses;Varidnaviria;Bamfordvirae;Nucleocytoviricota;Megaviricetes;Algavirales;Phycodnaviridae;Chlorovirus;ParameciumbursariaChlorellavirusA1.	Phycodnaviridae	dsDNA
TRINITY_DN3791_c0_g1_i50	YP_010796961.1	2785	36.548	788	447	16	2712	448	418	1185	6.86e-135	436	PolB [Mayetiola barley midge adintovirus].	Mayetiola barley midge adintovirus	Viruses;Varidnaviria;Bamfordvirae;Preplasmiviricota;Polintoviricetes;Orthopolintovirales;Adintoviridae;Alphadintovirus;Alphadintovirusmayetiola.	Adintoviridae	dsDNA
TRINITY_DN3791_c0_g1_i13	YP_010796961.1	4520	42.912	776	403	12	3014	783	418	1185	0	575	PolB [Mayetiola barley midge adintovirus].	Mayetiola barley midge adintovirus	Viruses;Varidnaviria;Bamfordvirae;Preplasmiviricota;Polintoviricetes;Orthopolintovirales;Adintoviridae;Alphadintovirus;Alphadintovirusmayetiola.	Adintoviridae	dsDNA
TRINITY_DN5674_c0_g1_i9	YP_010841540.1	5694	35.409	771	366	13	5390	3162	549	1215	1.32e-27	126	collagen-like protein 7 [Cotonvirus japonicus].	Cotonvirus japonicus	Viruses;Varidnaviria;Bamfordvirae;Nucleocytoviricota;Megaviricetes;Imitervirales;Mimiviridae;Megamimivirinae;Cotonvirus;Cotonvirusjaponicum.	Mimiviridae	dsDNA
TRINITY_DN35432_c0_g1_i3	YP_009325865.1	3508	30.779	770	447	26	762	2981	114	827	1.68e-79	283	ATPase [Only Syngen Nebraska virus 5].	Only Syngen Nebraska virus 5	Viruses;Varidnaviria;Bamfordvirae;Nucleocytoviricota;Megaviricetes;Algavirales;Phycodnaviridae;Chlorovirus.	Phycodnaviridae	dsDNA
TRINITY_DN3791_c0_g1_i11	YP_009325865.1	3439	30.779	770	447	26	693	2912	114	827	1.15e-79	283	ATPase [Only Syngen Nebraska virus 5].	Only Syngen Nebraska virus 5	Viruses;Varidnaviria;Bamfordvirae;Nucleocytoviricota;Megaviricetes;Algavirales;Phycodnaviridae;Chlorovirus.	Phycodnaviridae	dsDNA
TRINITY_DN11816_c4_g1_i1	YP_009325865.1	3416	30.779	770	447	26	670	2889	114	827	7e-80	283	ATPase [Only Syngen Nebraska virus 5].	Only Syngen Nebraska virus 5	Viruses;Varidnaviria;Bamfordvirae;Nucleocytoviricota;Megaviricetes;Algavirales;Phycodnaviridae;Chlorovirus.	Phycodnaviridae	dsDNA
TRINITY_DN7656_c0_g1_i10	YP_009325865.1	3246	30.779	770	447	26	500	2719	114	827	5.34e-80	283	ATPase [Only Syngen Nebraska virus 5].	Only Syngen Nebraska virus 5	Viruses;Varidnaviria;Bamfordvirae;Nucleocytoviricota;Megaviricetes;Algavirales;Phycodnaviridae;Chlorovirus.	Phycodnaviridae	dsDNA
TRINITY_DN4157_c0_g1_i12	YP_010803532.1	2760	53.706	769	331	8	175	2466	8	756	0	789	eukaryotic translation elongation factor 2 [Fadolivirusalgeromassiliense].	Fadolivirus algeromassiliense	Viruses;Varidnaviria;Bamfordvirae;Nucleocytoviricota;Megaviricetes;Imitervirales;Mimiviridae;Klosneuvirinae;Fadolivirus.	Mimiviridae	dsDNA
TRINITY_DN66784_c0_g2_i5	YP_007354261.1	3270	27.734	768	443	32	2846	762	33	761	4.78e-53	206	isoleucyl-tRNA synthetase [Acanthamoeba polyphaga moumouvirus].	Acanthamoeba polyphaga moumouvirus	Viruses;Varidnaviria;Bamfordvirae;Nucleocytoviricota;Megaviricetes;Imitervirales;Mimiviridae;Megamimivirinae;Moumouvirus.	Mimiviridae	dsDNA
TRINITY_DN7656_c0_g1_i13	YP_009665578.1	2875	29.79	762	443	24	198	2387	138	839	3.23e-79	279	ATPase [Paramecium bursaria Chlorella virus NYs1].	Paramecium bursaria Chlorella virus NYs1	Viruses;Varidnaviria;Bamfordvirae;Nucleocytoviricota;Megaviricetes;Algavirales;Phycodnaviridae;Chlorovirus.	Phycodnaviridae	dsDNA
TRINITY_DN5495_c0_g1_i3	YP_003986584.1	4051	24.342	760	457	25	2399	204	50	719	1.57e-34	147	putative ankyrin repeat protein [Acanthamoeba polyphaga mimivirus].	Acanthamoeba polyphaga mimivirus	Viruses;Varidnaviria;Bamfordvirae;Nucleocytoviricota;Megaviricetes;Imitervirales;Mimiviridae;Megamimivirinae;Mimivirus;Mimivirusbradfordmassiliense.	Mimiviridae	dsDNA
TRINITY_DN9331_c0_g1_i17	YP_010796961.1	3693	36.724	757	418	18	2687	495	364	1085	3.84e-127	424	PolB [Mayetiola barley midge adintovirus].	Mayetiola barley midge adintovirus	Viruses;Varidnaviria;Bamfordvirae;Preplasmiviricota;Polintoviricetes;Orthopolintovirales;Adintoviridae;Alphadintovirus;Alphadintovirusmayetiola.	Adintoviridae	dsDNA
TRINITY_DN1280_c0_g1_i12	YP_009505829.1	3044	71.126	755	216	2	2624	366	48	802	0	1155	RR1 [Spodoptera littoralis nucleopolyhedrovirus].	Spodoptera littoralis nucleopolyhedrovirus	Viruses;Naldaviricetes;Lefavirales;Baculoviridae;Alphabaculovirus;Alphabaculovirussplittoralis.	Baculoviridae	dsDNA
TRINITY_DN1280_c0_g1_i8	YP_010803532.1	3107	24.138	754	440	25	282	2201	9	744	3.49e-30	132	eukaryotic translation elongation factor 2 [Fadolivirusalgeromassiliense].	Fadolivirus algeromassiliense	Viruses;Varidnaviria;Bamfordvirae;Nucleocytoviricota;Megaviricetes;Imitervirales;Mimiviridae;Klosneuvirinae;Fadolivirus.	Mimiviridae	dsDNA
TRINITY_DN1280_c0_g1_i22	YP_010796961.1	3905	37.052	753	417	17	2900	720	364	1085	1.7e-128	429	PolB [Mayetiola barley midge adintovirus].	Mayetiola barley midge adintovirus	Viruses;Varidnaviria;Bamfordvirae;Preplasmiviricota;Polintoviricetes;Orthopolintovirales;Adintoviridae;Alphadintovirus;Alphadintovirusmayetiola.	Adintoviridae	dsDNA
TRINITY_DN8212_c0_g1_i11	YP_008052546.1	2602	47.676	753	372	11	2433	199	462	1200	0	700	DNA-directed RNA polymerase II subunit RPB2 [Phaeocystis globosavirus].	Phaeocystis globosa virus	Viruses;Varidnaviria;Bamfordvirae;Nucleocytoviricota;Megaviricetes;Algavirales;Phycodnaviridae;Prymnesiovirus.	Phycodnaviridae	dsDNA
TRINITY_DN8212_c0_g1_i5	YP_010796961.1	2225	36.533	750	406	15	2206	86	137	859	5.5e-139	441	PolB [Mayetiola barley midge adintovirus].	Mayetiola barley midge adintovirus	Viruses;Varidnaviria;Bamfordvirae;Preplasmiviricota;Polintoviricetes;Orthopolintovirales;Adintoviridae;Alphadintovirus;Alphadintovirusmayetiola.	Adintoviridae	dsDNA
TRINITY_DN4658_c0_g1_i7	YP_010087656.1	13229	25.235	745	455	20	2696	699	209	930	1.83e-46	170	LEF-8 [Homarus gammarus nudivirus].	Homarus gammarus nudivirus	Viruses;Naldaviricetes;Lefavirales;Nudiviridae;Gammanudivirus;Gammanudivirushogammari.	Nudiviridae	dsDNA
TRINITY_DN5638_c0_g1_i11	YP_010087656.1	13229	25.101	745	456	20	6491	8488	209	930	4.94e-46	168	LEF-8 [Homarus gammarus nudivirus].	Homarus gammarus nudivirus	Viruses;Naldaviricetes;Lefavirales;Nudiviridae;Gammanudivirus;Gammanudivirushogammari.	Nudiviridae	dsDNA
TRINITY_DN50053_c0_g1_i3	YP_010087656.1	13229	25.235	745	455	20	2696	699	209	930	1.83e-46	170	LEF-8 [Homarus gammarus nudivirus].	Homarus gammarus nudivirus	Viruses;Naldaviricetes;Lefavirales;Nudiviridae;Gammanudivirus;Gammanudivirushogammari.	Nudiviridae	dsDNA
TRINITY_DN15882_c0_g1_i6	YP_010087656.1	13229	25.101	745	456	20	6491	8488	209	930	4.94e-46	168	LEF-8 [Homarus gammarus nudivirus].	Homarus gammarus nudivirus	Viruses;Naldaviricetes;Lefavirales;Nudiviridae;Gammanudivirus;Gammanudivirushogammari.	Nudiviridae	dsDNA
TRINITY_DN362_c5_g1_i1	YP_010087656.1	11033	25.235	745	455	20	2696	699	209	930	1.53e-46	170	LEF-8 [Homarus gammarus nudivirus].	Homarus gammarus nudivirus	Viruses;Naldaviricetes;Lefavirales;Nudiviridae;Gammanudivirus;Gammanudivirushogammari.	Nudiviridae	dsDNA
TRINITY_DN5573_c0_g1_i16	YP_010087656.1	11033	25.101	745	456	20	6491	8488	209	930	4.14e-46	168	LEF-8 [Homarus gammarus nudivirus].	Homarus gammarus nudivirus	Viruses;Naldaviricetes;Lefavirales;Nudiviridae;Gammanudivirus;Gammanudivirushogammari.	Nudiviridae	dsDNA
TRINITY_DN5573_c0_g1_i7	YP_009342207.1	2757	42.098	734	370	13	44	2239	4	684	0	545	AAA+ ATPase predicted domain [Lymphocystis disease virus Sa].	Lymphocystis disease virus Sa	Viruses;Varidnaviria;Bamfordvirae;Nucleocytoviricota;Megaviricetes;Pimascovirales;Iridoviridae;Alphairidovirinae;Lymphocystivirus.	Iridoviridae	dsDNA
TRINITY_DN5495_c0_g1_i13	YP_009342207.1	2684	42.098	734	370	13	44	2239	4	684	0	545	AAA+ ATPase predicted domain [Lymphocystis disease virus Sa].	Lymphocystis disease virus Sa	Viruses;Varidnaviria;Bamfordvirae;Nucleocytoviricota;Megaviricetes;Pimascovirales;Iridoviridae;Alphairidovirinae;Lymphocystivirus.	Iridoviridae	dsDNA
TRINITY_DN1487_c0_g1_i12	YP_010783546.1	2526	39.154	733	404	12	63	2252	10	703	1.21e-147	474	DNA-directed RNA polymerase II subunit Rpb1 [Tetraselmis virus 1].	Tetraselmis virus 1	Viruses;Varidnaviria;Bamfordvirae;Nucleocytoviricota;Megaviricetes;Imitervirales;Allomimiviridae;Oceanusvirus;Oceanusviruskaneohense.	Allomimiviridae	dsDNA
TRINITY_DN224002_c0_g1_i18	YP_009010708.1	2467	21.282	733	462	23	202	2220	35	712	5.13e-26	118	DNA-directed RNA polymerase II subunit RPB2 [Invertebrateiridovirus 25].	Invertebrate iridovirus 25	Viruses;Varidnaviria;Bamfordvirae;Nucleocytoviricota;Megaviricetes;Pimascovirales;Iridoviridae;Betairidovirinae;Chloriridovirus.	Iridoviridae	dsDNA
TRINITY_DN224002_c0_g1_i7	YP_003986584.1	3005	27.023	729	412	27	516	2615	82	719	2e-29	130	putative ankyrin repeat protein [Acanthamoeba polyphaga mimivirus].	Acanthamoeba polyphaga mimivirus	Viruses;Varidnaviria;Bamfordvirae;Nucleocytoviricota;Megaviricetes;Imitervirales;Mimiviridae;Megamimivirinae;Mimivirus;Mimivirusbradfordmassiliense.	Mimiviridae	dsDNA
TRINITY_DN346_c0_g1_i27	YP_007354233.1	2852	29.849	727	411	19	2766	643	243	889	3.61e-91	312	Glycosyltransferase family 25 fused to procollagen lysine2-oxoglutarate 5-dioxygenase [Acanthamoeba polyphaga moumouvirus].	Acanthamoeba polyphaga moumouvirus	Viruses;Varidnaviria;Bamfordvirae;Nucleocytoviricota;Megaviricetes;Imitervirales;Mimiviridae;Megamimivirinae;Moumouvirus.	Mimiviridae	dsDNA
TRINITY_DN346_c0_g1_i28	YP_009701904.1	3756	29.752	726	392	20	3627	1516	99	728	3.47e-62	233	ATPase [Paramecium bursaria Chlorella virus CVA-1].	Paramecium bursaria Chlorella virus CVA-1	Viruses;Varidnaviria;Bamfordvirae;Nucleocytoviricota;Megaviricetes;Algavirales;Phycodnaviridae;Chlorovirus;ParameciumbursariaChlorellavirusA1.	Phycodnaviridae	dsDNA
TRINITY_DN4998_c0_g2_i2	YP_009001498.1	2988	27.109	723	435	19	2812	662	368	1004	6.54e-73	267	ABC transporter [Anomala cuprea entomopoxvirus].	Anomala cuprea entomopoxvirus	Viruses;Varidnaviria;Bamfordvirae;Nucleocytoviricota;Pokkesviricetes;Chitovirales;Poxviridae;Entomopoxvirinae;Alphaentomopoxvirus.	Poxviridae	dsDNA
TRINITY_DN2117_c0_g1_i16	YP_009001498.1	2496	27.663	723	431	21	2320	170	368	1004	6.57e-74	267	ABC transporter [Anomala cuprea entomopoxvirus].	Anomala cuprea entomopoxvirus	Viruses;Varidnaviria;Bamfordvirae;Nucleocytoviricota;Pokkesviricetes;Chitovirales;Poxviridae;Entomopoxvirinae;Alphaentomopoxvirus.	Poxviridae	dsDNA
TRINITY_DN890_c0_g1_i22	YP_008052546.1	2422	47.199	714	356	10	2316	199	500	1200	0	665	DNA-directed RNA polymerase II subunit RPB2 [Phaeocystis globosavirus].	Phaeocystis globosa virus	Viruses;Varidnaviria;Bamfordvirae;Nucleocytoviricota;Megaviricetes;Algavirales;Phycodnaviridae;Prymnesiovirus.	Phycodnaviridae	dsDNA
TRINITY_DN890_c0_g1_i4	YP_001425667.1	2554	32.444	712	350	21	2412	325	47	643	1.74e-93	310	hypothetical protein FR483_N035R [Paramecium bursaria Chlorellavirus FR483].	Paramecium bursaria Chlorella virus FR483	Viruses;Varidnaviria;Bamfordvirae;Nucleocytoviricota;Megaviricetes;Algavirales;Phycodnaviridae;Chlorovirus;ParameciumbursariaChlorellavirusA1.	Phycodnaviridae	dsDNA
TRINITY_DN890_c0_g1_i9	YP_010783546.1	2481	31.364	711	424	17	2389	275	1	653	4.24e-103	351	DNA-directed RNA polymerase II subunit Rpb1 [Tetraselmis virus 1].	Tetraselmis virus 1	Viruses;Varidnaviria;Bamfordvirae;Nucleocytoviricota;Megaviricetes;Imitervirales;Allomimiviridae;Oceanusvirus;Oceanusviruskaneohense.	Allomimiviridae	dsDNA
TRINITY_DN890_c0_g1_i26	YP_010783546.1	2479	31.364	711	424	17	2387	273	1	653	3.4e-103	352	DNA-directed RNA polymerase II subunit Rpb1 [Tetraselmis virus 1].	Tetraselmis virus 1	Viruses;Varidnaviria;Bamfordvirae;Nucleocytoviricota;Megaviricetes;Imitervirales;Allomimiviridae;Oceanusvirus;Oceanusviruskaneohense.	Allomimiviridae	dsDNA
TRINITY_DN890_c0_g1_i15	YP_010796961.1	5866	42.113	710	350	11	2860	890	484	1185	1.6e-167	508	PolB [Mayetiola barley midge adintovirus].	Mayetiola barley midge adintovirus	Viruses;Varidnaviria;Bamfordvirae;Preplasmiviricota;Polintoviricetes;Orthopolintovirales;Adintoviridae;Alphadintovirus;Alphadintovirusmayetiola.	Adintoviridae	dsDNA
TRINITY_DN890_c0_g1_i1	YP_010796961.1	5852	42.113	710	350	11	2860	890	484	1185	1.03e-168	508	PolB [Mayetiola barley midge adintovirus].	Mayetiola barley midge adintovirus	Viruses;Varidnaviria;Bamfordvirae;Preplasmiviricota;Polintoviricetes;Orthopolintovirales;Adintoviridae;Alphadintovirus;Alphadintovirusmayetiola.	Adintoviridae	dsDNA
TRINITY_DN2117_c0_g1_i24	YP_010803136.1	2532	28.732	710	371	27	200	2101	51	701	2.62e-50	192	HrpA-like RNA helicase [Fadolivirus algeromassiliense].	Fadolivirus algeromassiliense	Viruses;Varidnaviria;Bamfordvirae;Nucleocytoviricota;Megaviricetes;Imitervirales;Mimiviridae;Klosneuvirinae;Fadolivirus.	Mimiviridae	dsDNA
TRINITY_DN2117_c0_g1_i6	YP_009325872.1	3105	23.121	705	448	22	2161	131	28	666	9.03e-27	121	SerThr protein phosphatase 6 regulatory ankyrin repeat subunit Blike [Only Syngen Nebraska virus 5].	Only Syngen Nebraska virus 5	Viruses;Varidnaviria;Bamfordvirae;Nucleocytoviricota;Megaviricetes;Algavirales;Phycodnaviridae;Chlorovirus.	Phycodnaviridae	dsDNA
TRINITY_DN2117_c0_g1_i22	YP_009701904.1	4348	22.301	704	410	23	1872	3821	72	692	4.5e-23	110	ATPase [Paramecium bursaria Chlorella virus CVA-1].	Paramecium bursaria Chlorella virus CVA-1	Viruses;Varidnaviria;Bamfordvirae;Nucleocytoviricota;Megaviricetes;Algavirales;Phycodnaviridae;Chlorovirus;ParameciumbursariaChlorellavirusA1.	Phycodnaviridae	dsDNA
TRINITY_DN2117_c0_g1_i8	YP_009701904.1	3973	22.301	704	410	23	1497	3446	72	692	3.93e-23	110	ATPase [Paramecium bursaria Chlorella virus CVA-1].	Paramecium bursaria Chlorella virus CVA-1	Viruses;Varidnaviria;Bamfordvirae;Nucleocytoviricota;Megaviricetes;Algavirales;Phycodnaviridae;Chlorovirus;ParameciumbursariaChlorellavirusA1.	Phycodnaviridae	dsDNA
TRINITY_DN27054_c0_g1_i36	YP_010841540.1	5694	30.156	703	256	16	5393	3369	719	1214	5.19e-20	101	collagen-like protein 7 [Cotonvirus japonicus].	Cotonvirus japonicus	Viruses;Varidnaviria;Bamfordvirae;Nucleocytoviricota;Megaviricetes;Imitervirales;Mimiviridae;Megamimivirinae;Cotonvirus;Cotonvirusjaponicum.	Mimiviridae	dsDNA
TRINITY_DN7508_c0_g1_i21	YP_009701904.1	2621	22.617	703	405	24	238	2181	72	690	1.01e-23	111	ATPase [Paramecium bursaria Chlorella virus CVA-1].	Paramecium bursaria Chlorella virus CVA-1	Viruses;Varidnaviria;Bamfordvirae;Nucleocytoviricota;Megaviricetes;Algavirales;Phycodnaviridae;Chlorovirus;ParameciumbursariaChlorellavirusA1.	Phycodnaviridae	dsDNA
TRINITY_DN1487_c0_g1_i3	YP_009701904.1	4427	22.365	702	408	23	2044	3987	72	690	3.4e-23	110	ATPase [Paramecium bursaria Chlorella virus CVA-1].	Paramecium bursaria Chlorella virus CVA-1	Viruses;Varidnaviria;Bamfordvirae;Nucleocytoviricota;Megaviricetes;Algavirales;Phycodnaviridae;Chlorovirus;ParameciumbursariaChlorellavirusA1.	Phycodnaviridae	dsDNA
TRINITY_DN437881_c0_g1_i1	YP_009701904.1	4255	22.365	702	408	23	1872	3815	72	690	3.2e-23	110	ATPase [Paramecium bursaria Chlorella virus CVA-1].	Paramecium bursaria Chlorella virus CVA-1	Viruses;Varidnaviria;Bamfordvirae;Nucleocytoviricota;Megaviricetes;Algavirales;Phycodnaviridae;Chlorovirus;ParameciumbursariaChlorellavirusA1.	Phycodnaviridae	dsDNA
TRINITY_DN83571_c0_g1_i3	YP_009701904.1	3880	22.365	702	408	23	1497	3440	72	690	2.78e-23	110	ATPase [Paramecium bursaria Chlorella virus CVA-1].	Paramecium bursaria Chlorella virus CVA-1	Viruses;Varidnaviria;Bamfordvirae;Nucleocytoviricota;Megaviricetes;Algavirales;Phycodnaviridae;Chlorovirus;ParameciumbursariaChlorellavirusA1.	Phycodnaviridae	dsDNA
TRINITY_DN13528_c0_g1_i37	YP_009325872.1	4008	23.286	700	445	21	2648	627	28	661	1.49e-27	124	SerThr protein phosphatase 6 regulatory ankyrin repeat subunit Blike [Only Syngen Nebraska virus 5].	Only Syngen Nebraska virus 5	Viruses;Varidnaviria;Bamfordvirae;Nucleocytoviricota;Megaviricetes;Algavirales;Phycodnaviridae;Chlorovirus.	Phycodnaviridae	dsDNA
TRINITY_DN13528_c0_g1_i41	YP_009325872.1	3766	23.286	700	445	21	2406	385	28	661	1.24e-27	124	SerThr protein phosphatase 6 regulatory ankyrin repeat subunit Blike [Only Syngen Nebraska virus 5].	Only Syngen Nebraska virus 5	Viruses;Varidnaviria;Bamfordvirae;Nucleocytoviricota;Megaviricetes;Algavirales;Phycodnaviridae;Chlorovirus.	Phycodnaviridae	dsDNA
TRINITY_DN27054_c0_g1_i18	YP_009325872.1	3683	23.286	700	445	21	2648	627	28	661	1.3e-27	124	SerThr protein phosphatase 6 regulatory ankyrin repeat subunit Blike [Only Syngen Nebraska virus 5].	Only Syngen Nebraska virus 5	Viruses;Varidnaviria;Bamfordvirae;Nucleocytoviricota;Megaviricetes;Algavirales;Phycodnaviridae;Chlorovirus.	Phycodnaviridae	dsDNA
TRINITY_DN27054_c0_g1_i6	YP_009325872.1	3027	23.286	700	445	21	2648	627	28	661	1.4e-27	123	SerThr protein phosphatase 6 regulatory ankyrin repeat subunit Blike [Only Syngen Nebraska virus 5].	Only Syngen Nebraska virus 5	Viruses;Varidnaviria;Bamfordvirae;Nucleocytoviricota;Megaviricetes;Algavirales;Phycodnaviridae;Chlorovirus.	Phycodnaviridae	dsDNA
TRINITY_DN27054_c0_g1_i35	YP_010803676.1	3302	34.15	694	366	9	308	2389	1	603	9.31e-138	438	valyl-tRNA synthetase [Fadolivirus algeromassiliense].	Fadolivirus algeromassiliense	Viruses;Varidnaviria;Bamfordvirae;Nucleocytoviricota;Megaviricetes;Imitervirales;Mimiviridae;Klosneuvirinae;Fadolivirus.	Mimiviridae	dsDNA
TRINITY_DN4486_c0_g2_i4	YP_010788465.1	4952	33.043	690	298	10	4787	2730	378	907	3.99e-34	147	collagen-like protein [Megavirus baoshan].	Megavirus baoshan	Viruses;Varidnaviria;Bamfordvirae;Nucleocytoviricota;Megaviricetes;Imitervirales;Mimiviridae;Megamimivirinae;Megavirus;Megavirusbaoshanense.	Mimiviridae	dsDNA
TRINITY_DN4486_c0_g2_i1	YP_010788465.1	4952	31.541	688	295	11	4769	2736	477	998	1.56e-23	112	collagen-like protein [Megavirus baoshan].	Megavirus baoshan	Viruses;Varidnaviria;Bamfordvirae;Nucleocytoviricota;Megaviricetes;Imitervirales;Mimiviridae;Megamimivirinae;Megavirus;Megavirusbaoshanense.	Mimiviridae	dsDNA
TRINITY_DN4486_c0_g2_i2	YP_009325557.1	2530	32.267	688	365	17	2376	331	1	593	2.06e-99	324	Glucosamine--fructose-6-phosphate aminotransferase [Only SyngenNebraska virus 5].	Only Syngen Nebraska virus 5	Viruses;Varidnaviria;Bamfordvirae;Nucleocytoviricota;Megaviricetes;Algavirales;Phycodnaviridae;Chlorovirus.	Phycodnaviridae	dsDNA
TRINITY_DN27054_c0_g1_i3	YP_010803621.1	2601	26.968	686	455	13	2327	333	7	667	1.53e-69	246	peptidase M3AM3B [Fadolivirus algeromassiliense].	Fadolivirus algeromassiliense	Viruses;Varidnaviria;Bamfordvirae;Nucleocytoviricota;Megaviricetes;Imitervirales;Mimiviridae;Klosneuvirinae;Fadolivirus.	Mimiviridae	dsDNA
TRINITY_DN1487_c0_g1_i8	YP_010804919.1	4886	25.22	682	425	22	2755	851	491	1134	6.98e-40	166	DNA polymerase [Acanthamoeba castellanii medusavirus].	Acanthamoeba castellanii medusavirus	Viruses.	Viruses	unclassified viruses
TRINITY_DN34726_c0_g1_i2	YP_010778001.1	2338	26.579	681	417	20	59	1966	1	643	3.01e-47	182	putative nuclear export mediator factor NEMF-like protein [Bodosaltans virus].	Bodo saltans virus	Viruses;Varidnaviria;Bamfordvirae;Nucleocytoviricota;Megaviricetes;Imitervirales;Mimiviridae;Klosneuvirinae;Theiavirus;Theiavirussalishense.	Mimiviridae	dsDNA
TRINITY_DN34726_c0_g1_i1	YP_010778001.1	2289	26.579	681	417	20	59	1966	1	643	2.56e-47	182	putative nuclear export mediator factor NEMF-like protein [Bodosaltans virus].	Bodo saltans virus	Viruses;Varidnaviria;Bamfordvirae;Nucleocytoviricota;Megaviricetes;Imitervirales;Mimiviridae;Klosneuvirinae;Theiavirus;Theiavirussalishense.	Mimiviridae	dsDNA
TRINITY_DN34726_c0_g1_i4	YP_010803676.1	4458	34.559	680	354	9	742	2781	15	603	1.17e-134	438	valyl-tRNA synthetase [Fadolivirus algeromassiliense].	Fadolivirus algeromassiliense	Viruses;Varidnaviria;Bamfordvirae;Nucleocytoviricota;Megaviricetes;Imitervirales;Mimiviridae;Klosneuvirinae;Fadolivirus.	Mimiviridae	dsDNA
TRINITY_DN43369_c0_g2_i4	YP_010803676.1	4066	34.559	680	354	9	350	2389	15	603	1.34e-135	438	valyl-tRNA synthetase [Fadolivirus algeromassiliense].	Fadolivirus algeromassiliense	Viruses;Varidnaviria;Bamfordvirae;Nucleocytoviricota;Megaviricetes;Imitervirales;Mimiviridae;Klosneuvirinae;Fadolivirus.	Mimiviridae	dsDNA
TRINITY_DN4203_c2_g1_i6	YP_010803676.1	4010	34.559	680	354	9	350	2389	15	603	9.63e-136	438	valyl-tRNA synthetase [Fadolivirus algeromassiliense].	Fadolivirus algeromassiliense	Viruses;Varidnaviria;Bamfordvirae;Nucleocytoviricota;Megaviricetes;Imitervirales;Mimiviridae;Klosneuvirinae;Fadolivirus.	Mimiviridae	dsDNA
TRINITY_DN4203_c2_g1_i1	YP_003969699.1	3730	27.059	680	414	19	630	2609	2	619	2.67e-60	222	putative metalloendopeptidase [Cafeteria roenbergensis virusBV-PW1].	Cafeteria roenbergensis virus BV-PW1	Viruses;Varidnaviria;Bamfordvirae;Nucleocytoviricota;Megaviricetes;Imitervirales;Mimiviridae;Aliimimivirinae;Rheavirus;Rheavirussinusmexicani.	Mimiviridae	dsDNA
TRINITY_DN50053_c0_g1_i9	YP_003969699.1	3611	27.059	680	414	19	511	2490	2	619	2.13e-60	222	putative metalloendopeptidase [Cafeteria roenbergensis virusBV-PW1].	Cafeteria roenbergensis virus BV-PW1	Viruses;Varidnaviria;Bamfordvirae;Nucleocytoviricota;Megaviricetes;Imitervirales;Mimiviridae;Aliimimivirinae;Rheavirus;Rheavirussinusmexicani.	Mimiviridae	dsDNA
TRINITY_DN14018_c0_g1_i2	YP_003969699.1	3596	27.059	680	414	19	511	2490	2	619	2.1e-60	222	putative metalloendopeptidase [Cafeteria roenbergensis virusBV-PW1].	Cafeteria roenbergensis virus BV-PW1	Viruses;Varidnaviria;Bamfordvirae;Nucleocytoviricota;Megaviricetes;Imitervirales;Mimiviridae;Aliimimivirinae;Rheavirus;Rheavirussinusmexicani.	Mimiviridae	dsDNA
TRINITY_DN14018_c0_g1_i15	YP_010803676.1	2972	34.412	680	355	8	350	2389	15	603	7.66e-139	437	valyl-tRNA synthetase [Fadolivirus algeromassiliense].	Fadolivirus algeromassiliense	Viruses;Varidnaviria;Bamfordvirae;Nucleocytoviricota;Megaviricetes;Imitervirales;Mimiviridae;Klosneuvirinae;Fadolivirus.	Mimiviridae	dsDNA
TRINITY_DN14018_c0_g1_i3	YP_009325557.1	2506	32.647	680	365	17	2352	331	1	593	5.2e-101	328	Glucosamine--fructose-6-phosphate aminotransferase [Only SyngenNebraska virus 5].	Only Syngen Nebraska virus 5	Viruses;Varidnaviria;Bamfordvirae;Nucleocytoviricota;Megaviricetes;Algavirales;Phycodnaviridae;Chlorovirus.	Phycodnaviridae	dsDNA
TRINITY_DN27054_c0_g1_i9	YP_003969699.1	3223	27.745	674	419	14	2231	246	2	619	5.9e-72	254	putative metalloendopeptidase [Cafeteria roenbergensis virusBV-PW1].	Cafeteria roenbergensis virus BV-PW1	Viruses;Varidnaviria;Bamfordvirae;Nucleocytoviricota;Megaviricetes;Imitervirales;Mimiviridae;Aliimimivirinae;Rheavirus;Rheavirussinusmexicani.	Mimiviridae	dsDNA
TRINITY_DN7656_c0_g1_i17	YP_003969699.1	2715	27.745	674	419	14	2231	246	2	619	1.15e-72	254	putative metalloendopeptidase [Cafeteria roenbergensis virusBV-PW1].	Cafeteria roenbergensis virus BV-PW1	Viruses;Varidnaviria;Bamfordvirae;Nucleocytoviricota;Megaviricetes;Imitervirales;Mimiviridae;Aliimimivirinae;Rheavirus;Rheavirussinusmexicani.	Mimiviridae	dsDNA
TRINITY_DN5674_c0_g1_i7	YP_003969699.1	2674	27.745	674	419	14	2231	246	2	619	8.38e-73	254	putative metalloendopeptidase [Cafeteria roenbergensis virusBV-PW1].	Cafeteria roenbergensis virus BV-PW1	Viruses;Varidnaviria;Bamfordvirae;Nucleocytoviricota;Megaviricetes;Imitervirales;Mimiviridae;Aliimimivirinae;Rheavirus;Rheavirussinusmexicani.	Mimiviridae	dsDNA
TRINITY_DN22474_c0_g1_i3	YP_010841542.1	5878	37.798	672	318	13	2213	4087	88	706	3.81e-23	111	collagen-like protein [Cotonvirus japonicus].	Cotonvirus japonicus	Viruses;Varidnaviria;Bamfordvirae;Nucleocytoviricota;Megaviricetes;Imitervirales;Mimiviridae;Megamimivirinae;Cotonvirus;Cotonvirusjaponicum.	Mimiviridae	dsDNA
TRINITY_DN7082_c0_g1_i10	YP_010802886.1	3175	42.772	671	324	13	372	2378	6	618	2.55e-165	503	GMP synthetase glutamine amidotransferase and ATP pyrophosphatasedomain protein [Fadolivirus algeromassiliense].	Fadolivirus algeromassiliense	Viruses;Varidnaviria;Bamfordvirae;Nucleocytoviricota;Megaviricetes;Imitervirales;Mimiviridae;Klosneuvirinae;Fadolivirus.	Mimiviridae	dsDNA
TRINITY_DN7082_c0_g1_i24	YP_010802886.1	3163	42.772	671	324	13	360	2366	6	618	4.75e-165	502	GMP synthetase glutamine amidotransferase and ATP pyrophosphatasedomain protein [Fadolivirus algeromassiliense].	Fadolivirus algeromassiliense	Viruses;Varidnaviria;Bamfordvirae;Nucleocytoviricota;Megaviricetes;Imitervirales;Mimiviridae;Klosneuvirinae;Fadolivirus.	Mimiviridae	dsDNA
TRINITY_DN7082_c0_g1_i1	YP_010777010.1	2167	25.931	671	371	24	414	2162	79	711	3.55e-24	112	putative ankyrin repeat protein [Acanthamoeba polyphaga mimivirus].	Acanthamoeba polyphaga mimivirus	Viruses;Varidnaviria;Bamfordvirae;Nucleocytoviricota;Megaviricetes;Imitervirales;Mimiviridae;Megamimivirinae;Mimivirus;Mimivirusbradfordmassiliense.	Mimiviridae	dsDNA
TRINITY_DN5675_c2_g1_i13	YP_003969699.1	3254	27.612	670	419	15	2122	158	1	619	9.31e-65	234	putative metalloendopeptidase [Cafeteria roenbergensis virusBV-PW1].	Cafeteria roenbergensis virus BV-PW1	Viruses;Varidnaviria;Bamfordvirae;Nucleocytoviricota;Megaviricetes;Imitervirales;Mimiviridae;Aliimimivirinae;Rheavirus;Rheavirussinusmexicani.	Mimiviridae	dsDNA
TRINITY_DN5675_c2_g1_i19	YP_003969699.1	3039	27.612	670	419	15	2122	158	1	619	5.56e-65	234	putative metalloendopeptidase [Cafeteria roenbergensis virusBV-PW1].	Cafeteria roenbergensis virus BV-PW1	Viruses;Varidnaviria;Bamfordvirae;Nucleocytoviricota;Megaviricetes;Imitervirales;Mimiviridae;Aliimimivirinae;Rheavirus;Rheavirussinusmexicani.	Mimiviridae	dsDNA
TRINITY_DN23_c0_g1_i2	YP_003969699.1	2575	27.761	670	418	15	2122	158	1	619	9.67e-66	234	putative metalloendopeptidase [Cafeteria roenbergensis virusBV-PW1].	Cafeteria roenbergensis virus BV-PW1	Viruses;Varidnaviria;Bamfordvirae;Nucleocytoviricota;Megaviricetes;Imitervirales;Mimiviridae;Aliimimivirinae;Rheavirus;Rheavirussinusmexicani.	Mimiviridae	dsDNA
TRINITY_DN23_c0_g1_i3	YP_010788465.1	4952	34.132	668	312	10	4532	2730	181	787	1.57e-26	122	collagen-like protein [Megavirus baoshan].	Megavirus baoshan	Viruses;Varidnaviria;Bamfordvirae;Nucleocytoviricota;Megaviricetes;Imitervirales;Mimiviridae;Megamimivirinae;Megavirus;Megavirusbaoshanense.	Mimiviridae	dsDNA
TRINITY_DN96198_c0_g1_i9	YP_010803676.1	3796	34.933	667	347	8	175	2175	24	603	1.33e-134	433	valyl-tRNA synthetase [Fadolivirus algeromassiliense].	Fadolivirus algeromassiliense	Viruses;Varidnaviria;Bamfordvirae;Nucleocytoviricota;Megaviricetes;Imitervirales;Mimiviridae;Klosneuvirinae;Fadolivirus.	Mimiviridae	dsDNA
TRINITY_DN17474_c0_g1_i17	YP_010796961.1	2012	39.88	667	365	13	1939	8	418	1071	3.13e-139	439	PolB [Mayetiola barley midge adintovirus].	Mayetiola barley midge adintovirus	Viruses;Varidnaviria;Bamfordvirae;Preplasmiviricota;Polintoviricetes;Orthopolintovirales;Adintoviridae;Alphadintovirus;Alphadintovirusmayetiola.	Adintoviridae	dsDNA
TRINITY_DN17474_c0_g1_i18	YP_010803532.1	4209	52.338	663	292	7	223	2196	8	651	0	655	eukaryotic translation elongation factor 2 [Fadolivirusalgeromassiliense].	Fadolivirus algeromassiliense	Viruses;Varidnaviria;Bamfordvirae;Nucleocytoviricota;Megaviricetes;Imitervirales;Mimiviridae;Klosneuvirinae;Fadolivirus.	Mimiviridae	dsDNA
TRINITY_DN17474_c0_g1_i19	YP_010788465.1	4952	32.322	659	326	20	4532	2739	696	1295	1.08e-06	57.4	collagen-like protein [Megavirus baoshan].	Megavirus baoshan	Viruses;Varidnaviria;Bamfordvirae;Nucleocytoviricota;Megaviricetes;Imitervirales;Mimiviridae;Megamimivirinae;Megavirus;Megavirusbaoshanense.	Mimiviridae	dsDNA
TRINITY_DN17474_c0_g1_i2	YP_010803112.1	2609	19.727	659	458	19	2016	196	40	679	8.74e-35	145	peptidase M3AM3B [Fadolivirus algeromassiliense].	Fadolivirus algeromassiliense	Viruses;Varidnaviria;Bamfordvirae;Nucleocytoviricota;Megaviricetes;Imitervirales;Mimiviridae;Klosneuvirinae;Fadolivirus.	Mimiviridae	dsDNA
TRINITY_DN17474_c0_g1_i23	YP_009482408.1	3307	21.56	654	388	21	508	2316	35	614	1.36e-14	82	hAT family C-terminal dimerization region domain containing protein[Pandoravirus neocaledonia].	Pandoravirus neocaledonia	Viruses;Pandoravirus.	Pandoravirus	dsDNA
TRINITY_DN17474_c0_g1_i3	YP_009482408.1	3155	21.56	654	388	21	508	2316	35	614	1.27e-14	82	hAT family C-terminal dimerization region domain containing protein[Pandoravirus neocaledonia].	Pandoravirus neocaledonia	Viruses;Pandoravirus.	Pandoravirus	dsDNA
TRINITY_DN890_c0_g1_i2	YP_009482408.1	3148	21.56	654	388	21	501	2309	35	614	1.27e-14	82	hAT family C-terminal dimerization region domain containing protein[Pandoravirus neocaledonia].	Pandoravirus neocaledonia	Viruses;Pandoravirus.	Pandoravirus	dsDNA
TRINITY_DN21105_c0_g1_i9	YP_010841540.1	5694	31.547	653	269	14	5393	3441	746	1222	3.51e-13	79.3	collagen-like protein 7 [Cotonvirus japonicus].	Cotonvirus japonicus	Viruses;Varidnaviria;Bamfordvirae;Nucleocytoviricota;Megaviricetes;Imitervirales;Mimiviridae;Megamimivirinae;Cotonvirus;Cotonvirusjaponicum.	Mimiviridae	dsDNA
TRINITY_DN4658_c0_g1_i12	YP_003986584.1	3005	25.727	653	366	21	390	2102	105	720	1.02e-31	137	putative ankyrin repeat protein [Acanthamoeba polyphaga mimivirus].	Acanthamoeba polyphaga mimivirus	Viruses;Varidnaviria;Bamfordvirae;Nucleocytoviricota;Megaviricetes;Imitervirales;Mimiviridae;Megamimivirinae;Mimivirus;Mimivirusbradfordmassiliense.	Mimiviridae	dsDNA
TRINITY_DN50053_c0_g1_i4	YP_010803290.1	4371	30.368	652	363	18	200	2053	1	595	1.01e-68	246	5-3 exoribonuclease [Fadolivirus algeromassiliense].	Fadolivirus algeromassiliense	Viruses;Varidnaviria;Bamfordvirae;Nucleocytoviricota;Megaviricetes;Imitervirales;Mimiviridae;Klosneuvirinae;Fadolivirus.	Mimiviridae	dsDNA
TRINITY_DN15413_c0_g1_i1	YP_010803290.1	3904	30.368	652	363	18	200	2053	1	595	7.41e-69	246	5-3 exoribonuclease [Fadolivirus algeromassiliense].	Fadolivirus algeromassiliense	Viruses;Varidnaviria;Bamfordvirae;Nucleocytoviricota;Megaviricetes;Imitervirales;Mimiviridae;Klosneuvirinae;Fadolivirus.	Mimiviridae	dsDNA
TRINITY_DN80919_c0_g1_i6	YP_009417301.1	6128	33.744	649	352	22	2359	470	176	765	3.88e-72	263	RdRp [Australian Anopheles totivirus].	Australian Anopheles totivirus	Viruses;Riboviria;Orthornavirae;Duplornaviricota;Chrymotiviricetes;Ghabrivirales;Totiviridae.	Totiviridae	dsRNA
TRINITY_DN80919_c0_g1_i3	YP_009417301.1	6121	33.744	649	352	22	2359	470	176	765	3.87e-72	263	RdRp [Australian Anopheles totivirus].	Australian Anopheles totivirus	Viruses;Riboviria;Orthornavirae;Duplornaviricota;Chrymotiviricetes;Ghabrivirales;Totiviridae.	Totiviridae	dsRNA
TRINITY_DN5625_c0_g1_i2	NP_955606.1	2926	24.613	646	378	17	2303	480	46	620	2.33e-37	155	FBS [Fujinami sarcoma virus]	Fujinami sarcoma virus	Viruses; Riboviria; Pararnavirae; Artverviricota; Revtraviricetes; Ortervirales; Retroviridae; Orthoretrovirinae; Alpharetrovirus.	Retroviridae	ss-RNA
TRINITY_DN5625_c0_g1_i1	YP_009325865.1	4266	37.888	644	326	15	4088	2157	284	853	1.02e-115	388	ATPase [Only Syngen Nebraska virus 5].	Only Syngen Nebraska virus 5	Viruses;Varidnaviria;Bamfordvirae;Nucleocytoviricota;Megaviricetes;Algavirales;Phycodnaviridae;Chlorovirus.	Phycodnaviridae	dsDNA
TRINITY_DN9639_c0_g1_i2	YP_009325865.1	4266	37.888	644	326	15	4088	2157	284	853	1.33e-115	387	ATPase [Only Syngen Nebraska virus 5].	Only Syngen Nebraska virus 5	Viruses;Varidnaviria;Bamfordvirae;Nucleocytoviricota;Megaviricetes;Algavirales;Phycodnaviridae;Chlorovirus.	Phycodnaviridae	dsDNA
TRINITY_DN9639_c0_g1_i7	YP_009325865.1	4214	37.888	644	326	15	4036	2105	284	853	4.88e-116	388	ATPase [Only Syngen Nebraska virus 5].	Only Syngen Nebraska virus 5	Viruses;Varidnaviria;Bamfordvirae;Nucleocytoviricota;Megaviricetes;Algavirales;Phycodnaviridae;Chlorovirus.	Phycodnaviridae	dsDNA
TRINITY_DN715_c0_g1_i51	YP_009325865.1	4145	37.888	644	326	15	3967	2036	284	853	5.45e-116	388	ATPase [Only Syngen Nebraska virus 5].	Only Syngen Nebraska virus 5	Viruses;Varidnaviria;Bamfordvirae;Nucleocytoviricota;Megaviricetes;Algavirales;Phycodnaviridae;Chlorovirus.	Phycodnaviridae	dsDNA
TRINITY_DN94918_c0_g1_i2	YP_009325865.1	3016	37.888	644	326	15	2838	907	284	853	1.23e-118	387	ATPase [Only Syngen Nebraska virus 5].	Only Syngen Nebraska virus 5	Viruses;Varidnaviria;Bamfordvirae;Nucleocytoviricota;Megaviricetes;Algavirales;Phycodnaviridae;Chlorovirus.	Phycodnaviridae	dsDNA
TRINITY_DN793_c0_g1_i9	YP_009325865.1	2598	37.888	644	326	15	2420	489	284	853	4.93e-120	387	ATPase [Only Syngen Nebraska virus 5].	Only Syngen Nebraska virus 5	Viruses;Varidnaviria;Bamfordvirae;Nucleocytoviricota;Megaviricetes;Algavirales;Phycodnaviridae;Chlorovirus.	Phycodnaviridae	dsDNA
TRINITY_DN793_c0_g1_i14	YP_009701904.1	2367	23.795	643	364	23	149	1918	119	688	2.44e-23	109	ATPase [Paramecium bursaria Chlorella virus CVA-1].	Paramecium bursaria Chlorella virus CVA-1	Viruses;Varidnaviria;Bamfordvirae;Nucleocytoviricota;Megaviricetes;Algavirales;Phycodnaviridae;Chlorovirus;ParameciumbursariaChlorellavirusA1.	Phycodnaviridae	dsDNA
TRINITY_DN793_c0_g1_i15	YP_009329403.1	4850	26.636	642	392	14	1181	3058	12	590	4.67e-56	209	ABC transporter, partial [Cedratvirus A11].	Cedratvirus A11	Viruses;Pithoviruses.	Pithoviruses	dsDNA
TRINITY_DN793_c0_g1_i13	YP_009173653.1	3682	34.688	640	384	9	151	2016	823	1446	3.72e-111	384	DNA-directed RNA polymerase II, subunit RpB1 [Chrysochromulinaericina virus].	Chrysochromulina ericina virus	Viruses;Varidnaviria;Bamfordvirae;Nucleocytoviricota;Megaviricetes;Algavirales;Phycodnaviridae.	Phycodnaviridae	dsDNA
TRINITY_DN896_c0_g2_i10	YP_003986584.1	2158	25.665	639	391	21	390	2108	105	725	2.31e-31	134	putative ankyrin repeat protein [Acanthamoeba polyphaga mimivirus].	Acanthamoeba polyphaga mimivirus	Viruses;Varidnaviria;Bamfordvirae;Nucleocytoviricota;Megaviricetes;Imitervirales;Mimiviridae;Megamimivirinae;Mimivirus;Mimivirusbradfordmassiliense.	Mimiviridae	dsDNA
TRINITY_DN896_c0_g2_i1	YP_010781167.1	3733	36.478	636	391	4	444	2324	29	660	1.17e-134	429	threonyl-tRNA synthetase [Tupanvirus deep ocean].	Tupanvirus deep ocean	Viruses;Varidnaviria;Bamfordvirae;Nucleocytoviricota;Megaviricetes;Imitervirales;Mimiviridae;Megamimivirinae;Tupanvirus.	Mimiviridae	dsDNA
TRINITY_DN3452_c0_g1_i1	YP_010780309.1	2997	25.629	636	383	23	2842	977	4	563	2.43e-39	162	NcpA [Tupanvirus deep ocean].	Tupanvirus deep ocean	Viruses;Varidnaviria;Bamfordvirae;Nucleocytoviricota;Megaviricetes;Imitervirales;Mimiviridae;Megamimivirinae;Tupanvirus.	Mimiviridae	dsDNA
TRINITY_DN21105_c0_g1_i24	YP_010780309.1	3009	25.197	635	387	21	2842	977	4	563	1.79e-39	163	NcpA [Tupanvirus deep ocean].	Tupanvirus deep ocean	Viruses;Varidnaviria;Bamfordvirae;Nucleocytoviricota;Megaviricetes;Imitervirales;Mimiviridae;Megamimivirinae;Tupanvirus.	Mimiviridae	dsDNA
TRINITY_DN21105_c0_g1_i23	YP_010804160.1	2513	27.445	634	375	24	444	2189	41	641	1.8e-46	179	long-chain fatty acid CoA synthetase [Fadolivirusalgeromassiliense].	Fadolivirus algeromassiliense	Viruses;Varidnaviria;Bamfordvirae;Nucleocytoviricota;Megaviricetes;Imitervirales;Mimiviridae;Klosneuvirinae;Fadolivirus.	Mimiviridae	dsDNA
TRINITY_DN16039_c0_g1_i1	YP_010804160.1	2486	27.445	634	375	24	417	2162	41	641	1.71e-46	179	long-chain fatty acid CoA synthetase [Fadolivirusalgeromassiliense].	Fadolivirus algeromassiliense	Viruses;Varidnaviria;Bamfordvirae;Nucleocytoviricota;Megaviricetes;Imitervirales;Mimiviridae;Klosneuvirinae;Fadolivirus.	Mimiviridae	dsDNA
TRINITY_DN16039_c0_g1_i4	YP_010841542.1	5878	33.386	632	252	13	2225	4087	77	550	1.77e-20	102	collagen-like protein [Cotonvirus japonicus].	Cotonvirus japonicus	Viruses;Varidnaviria;Bamfordvirae;Nucleocytoviricota;Megaviricetes;Imitervirales;Mimiviridae;Megamimivirinae;Cotonvirus;Cotonvirusjaponicum.	Mimiviridae	dsDNA
TRINITY_DN7891_c0_g1_i3	YP_004061438.1	5029	65.506	632	200	5	4819	2963	4	630	0	791	hypothetical protein BpV1_008c [Bathycoccus sp. RCC1105 virusBpV1].	Bathycoccus sp. RCC1105 virus BpV1	Viruses;Varidnaviria;Bamfordvirae;Nucleocytoviricota;Megaviricetes;Algavirales;Phycodnaviridae;Prasinovirus;Bathycoccussp.RCC1105virusBpV.	Phycodnaviridae	dsDNA
TRINITY_DN13006_c0_g1_i10	YP_004061438.1	4747	65.506	632	200	5	4537	2681	4	630	0	791	hypothetical protein BpV1_008c [Bathycoccus sp. RCC1105 virusBpV1].	Bathycoccus sp. RCC1105 virus BpV1	Viruses;Varidnaviria;Bamfordvirae;Nucleocytoviricota;Megaviricetes;Algavirales;Phycodnaviridae;Prasinovirus;Bathycoccussp.RCC1105virusBpV.	Phycodnaviridae	dsDNA
TRINITY_DN3466_c0_g1_i35	YP_009325865.1	4133	21.677	632	374	26	341	2122	17	565	0.003	45.4	ATPase [Only Syngen Nebraska virus 5].	Only Syngen Nebraska virus 5	Viruses;Varidnaviria;Bamfordvirae;Nucleocytoviricota;Megaviricetes;Algavirales;Phycodnaviridae;Chlorovirus.	Phycodnaviridae	dsDNA
TRINITY_DN715_c0_g1_i67	YP_009001498.1	4727	24.444	630	409	20	3152	1314	101	680	1.15e-20	103	ABC transporter [Anomala cuprea entomopoxvirus].	Anomala cuprea entomopoxvirus	Viruses;Varidnaviria;Bamfordvirae;Nucleocytoviricota;Pokkesviricetes;Chitovirales;Poxviridae;Entomopoxvirinae;Alphaentomopoxvirus.	Poxviridae	dsDNA
TRINITY_DN3466_c0_g1_i37	YP_010780309.1	4492	25.397	630	386	18	4094	2268	1	567	1.85e-35	151	NcpA [Tupanvirus deep ocean].	Tupanvirus deep ocean	Viruses;Varidnaviria;Bamfordvirae;Nucleocytoviricota;Megaviricetes;Imitervirales;Mimiviridae;Megamimivirinae;Tupanvirus.	Mimiviridae	dsDNA
TRINITY_DN3466_c0_g1_i39	YP_010780309.1	4300	25.397	630	386	18	4094	2268	1	567	1.54e-35	151	NcpA [Tupanvirus deep ocean].	Tupanvirus deep ocean	Viruses;Varidnaviria;Bamfordvirae;Nucleocytoviricota;Megaviricetes;Imitervirales;Mimiviridae;Megamimivirinae;Tupanvirus.	Mimiviridae	dsDNA
TRINITY_DN3466_c0_g1_i23	YP_010780309.1	3347	25.397	630	386	18	3141	1315	1	567	8.89e-36	151	NcpA [Tupanvirus deep ocean].	Tupanvirus deep ocean	Viruses;Varidnaviria;Bamfordvirae;Nucleocytoviricota;Megaviricetes;Imitervirales;Mimiviridae;Megamimivirinae;Tupanvirus.	Mimiviridae	dsDNA
TRINITY_DN3466_c0_g1_i5	YP_010780309.1	2813	25.397	630	386	18	2607	781	1	567	4.31e-36	152	NcpA [Tupanvirus deep ocean].	Tupanvirus deep ocean	Viruses;Varidnaviria;Bamfordvirae;Nucleocytoviricota;Megaviricetes;Imitervirales;Mimiviridae;Megamimivirinae;Tupanvirus.	Mimiviridae	dsDNA
TRINITY_DN715_c0_g1_i20	YP_293911.1	4652	46.105	629	318	7	1562	3439	11	621	0	569	putative DNA ligase [Emiliania huxleyi virus 86].	Emiliania huxleyi virus 86	Viruses;Varidnaviria;Bamfordvirae;Nucleocytoviricota;Megaviricetes;Algavirales;Phycodnaviridae;Coccolithovirus.	Phycodnaviridae	dsDNA
TRINITY_DN3466_c0_g1_i24	YP_293911.1	3892	46.105	629	318	7	802	2679	11	621	0	568	putative DNA ligase [Emiliania huxleyi virus 86].	Emiliania huxleyi virus 86	Viruses;Varidnaviria;Bamfordvirae;Nucleocytoviricota;Megaviricetes;Algavirales;Phycodnaviridae;Coccolithovirus.	Phycodnaviridae	dsDNA
TRINITY_DN715_c0_g1_i87	YP_010780181.1	3013	28.662	628	366	21	135	1961	3	567	3.87e-50	194	hypothetical protein QJ856_gp1184 [Tupanvirus deep ocean].	Tupanvirus deep ocean	Viruses;Varidnaviria;Bamfordvirae;Nucleocytoviricota;Megaviricetes;Imitervirales;Mimiviridae;Megamimivirinae;Tupanvirus.	Mimiviridae	dsDNA
TRINITY_DN54736_c0_g1_i8	YP_009329403.1	5104	27.36	625	392	13	1486	3312	12	590	9.95e-60	220	ABC transporter, partial [Cedratvirus A11].	Cedratvirus A11	Viruses;Pithoviruses.	Pithoviruses	dsDNA
TRINITY_DN2462_c0_g2_i24	YP_009329403.1	4797	27.36	625	392	13	1181	3007	12	590	9.1e-60	220	ABC transporter, partial [Cedratvirus A11].	Cedratvirus A11	Viruses;Pithoviruses.	Pithoviruses	dsDNA
TRINITY_DN2462_c0_g2_i3	YP_010778125.1	3421	27.04	625	365	15	698	2503	6	562	4.6e-41	165	putative ATP-dependent RNA helicase [Bodo saltans virus].	Bodo saltans virus	Viruses;Varidnaviria;Bamfordvirae;Nucleocytoviricota;Megaviricetes;Imitervirales;Mimiviridae;Klosneuvirinae;Theiavirus;Theiavirussalishense.	Mimiviridae	dsDNA
TRINITY_DN2462_c0_g2_i18	YP_010778125.1	3269	27.04	625	365	15	698	2503	6	562	3.41e-41	166	putative ATP-dependent RNA helicase [Bodo saltans virus].	Bodo saltans virus	Viruses;Varidnaviria;Bamfordvirae;Nucleocytoviricota;Megaviricetes;Imitervirales;Mimiviridae;Klosneuvirinae;Theiavirus;Theiavirussalishense.	Mimiviridae	dsDNA
TRINITY_DN2462_c0_g2_i13	YP_008052581.1	4391	34.295	624	337	13	1337	3199	315	868	1.76e-95	342	DNA-directed RNA polymerase II subunit RPB1 [Phaeocystis globosavirus].	Phaeocystis globosa virus	Viruses;Varidnaviria;Bamfordvirae;Nucleocytoviricota;Megaviricetes;Algavirales;Phycodnaviridae;Prymnesiovirus.	Phycodnaviridae	dsDNA
TRINITY_DN3086_c9_g1_i4	YP_003986584.1	4051	25.843	623	362	24	2390	741	154	749	2.47e-27	124	putative ankyrin repeat protein [Acanthamoeba polyphaga mimivirus].	Acanthamoeba polyphaga mimivirus	Viruses;Varidnaviria;Bamfordvirae;Nucleocytoviricota;Megaviricetes;Imitervirales;Mimiviridae;Megamimivirinae;Mimivirus;Mimivirusbradfordmassiliense.	Mimiviridae	dsDNA
TRINITY_DN3086_c9_g1_i3	YP_010804160.1	3185	24.398	623	398	21	1045	2799	54	641	2.29e-24	113	long-chain fatty acid CoA synthetase [Fadolivirusalgeromassiliense].	Fadolivirus algeromassiliense	Viruses;Varidnaviria;Bamfordvirae;Nucleocytoviricota;Megaviricetes;Imitervirales;Mimiviridae;Klosneuvirinae;Fadolivirus.	Mimiviridae	dsDNA
TRINITY_DN11922_c0_g1_i1	YP_009325865.1	5735	23.312	622	327	24	3174	1381	133	628	1.66e-10	70.1	ATPase [Only Syngen Nebraska virus 5].	Only Syngen Nebraska virus 5	Viruses;Varidnaviria;Bamfordvirae;Nucleocytoviricota;Megaviricetes;Algavirales;Phycodnaviridae;Chlorovirus.	Phycodnaviridae	dsDNA
TRINITY_DN21093_c0_g1_i27	YP_009325865.1	5010	21.865	622	385	26	1218	2999	17	565	0.006	45.1	ATPase [Only Syngen Nebraska virus 5].	Only Syngen Nebraska virus 5	Viruses;Varidnaviria;Bamfordvirae;Nucleocytoviricota;Megaviricetes;Algavirales;Phycodnaviridae;Chlorovirus.	Phycodnaviridae	dsDNA
TRINITY_DN25720_c0_g1_i26	YP_009325865.1	4784	23.312	622	327	24	3174	1381	133	628	1.34e-10	70.1	ATPase [Only Syngen Nebraska virus 5].	Only Syngen Nebraska virus 5	Viruses;Varidnaviria;Bamfordvirae;Nucleocytoviricota;Megaviricetes;Algavirales;Phycodnaviridae;Chlorovirus.	Phycodnaviridae	dsDNA
TRINITY_DN21093_c0_g1_i25	YP_009325865.1	4698	23.312	622	327	24	3174	1381	133	628	1.31e-10	70.1	ATPase [Only Syngen Nebraska virus 5].	Only Syngen Nebraska virus 5	Viruses;Varidnaviria;Bamfordvirae;Nucleocytoviricota;Megaviricetes;Algavirales;Phycodnaviridae;Chlorovirus.	Phycodnaviridae	dsDNA
TRINITY_DN25720_c0_g1_i25	YP_009325865.1	4643	23.312	622	327	24	3174	1381	133	628	1.29e-10	70.1	ATPase [Only Syngen Nebraska virus 5].	Only Syngen Nebraska virus 5	Viruses;Varidnaviria;Bamfordvirae;Nucleocytoviricota;Megaviricetes;Algavirales;Phycodnaviridae;Chlorovirus.	Phycodnaviridae	dsDNA
TRINITY_DN3332_c0_g1_i2	YP_009325865.1	4557	23.312	622	327	24	3174	1381	133	628	1.26e-10	70.1	ATPase [Only Syngen Nebraska virus 5].	Only Syngen Nebraska virus 5	Viruses;Varidnaviria;Bamfordvirae;Nucleocytoviricota;Megaviricetes;Algavirales;Phycodnaviridae;Chlorovirus.	Phycodnaviridae	dsDNA
TRINITY_DN4808_c0_g1_i1	YP_009325865.1	4511	21.865	622	385	26	719	2500	17	565	0.005	45.1	ATPase [Only Syngen Nebraska virus 5].	Only Syngen Nebraska virus 5	Viruses;Varidnaviria;Bamfordvirae;Nucleocytoviricota;Megaviricetes;Algavirales;Phycodnaviridae;Chlorovirus.	Phycodnaviridae	dsDNA
TRINITY_DN54736_c0_g1_i11	YP_009325865.1	4316	23.312	622	327	24	3174	1381	133	628	1.18e-10	70.1	ATPase [Only Syngen Nebraska virus 5].	Only Syngen Nebraska virus 5	Viruses;Varidnaviria;Bamfordvirae;Nucleocytoviricota;Megaviricetes;Algavirales;Phycodnaviridae;Chlorovirus.	Phycodnaviridae	dsDNA
TRINITY_DN583_c0_g3_i1	YP_009325865.1	5153	21.613	620	389	23	2341	4122	17	565	0.006	45.1	ATPase [Only Syngen Nebraska virus 5].	Only Syngen Nebraska virus 5	Viruses;Varidnaviria;Bamfordvirae;Nucleocytoviricota;Megaviricetes;Algavirales;Phycodnaviridae;Chlorovirus.	Phycodnaviridae	dsDNA
TRINITY_DN11845_c0_g1_i1	YP_004894708.1	2532	29.564	619	384	16	232	1971	28	633	6.03e-74	258	putative ATP-dependent RNA helicase [Megavirus chiliensis].	Megavirus chiliensis	Viruses;Varidnaviria;Bamfordvirae;Nucleocytoviricota;Megaviricetes;Imitervirales;Mimiviridae;Megamimivirinae;Megavirus;Megaviruschilense.	Mimiviridae	dsDNA
TRINITY_DN129393_c0_g1_i3	YP_010804160.1	4185	45.955	618	312	10	1946	3775	43	646	1.29e-162	506	long-chain fatty acid CoA synthetase [Fadolivirusalgeromassiliense].	Fadolivirus algeromassiliense	Viruses;Varidnaviria;Bamfordvirae;Nucleocytoviricota;Megaviricetes;Imitervirales;Mimiviridae;Klosneuvirinae;Fadolivirus.	Mimiviridae	dsDNA
TRINITY_DN6597_c0_g1_i1	YP_010804160.1	3329	45.955	618	312	10	1090	2919	43	646	1.36e-165	506	long-chain fatty acid CoA synthetase [Fadolivirusalgeromassiliense].	Fadolivirus algeromassiliense	Viruses;Varidnaviria;Bamfordvirae;Nucleocytoviricota;Megaviricetes;Imitervirales;Mimiviridae;Klosneuvirinae;Fadolivirus.	Mimiviridae	dsDNA
TRINITY_DN1965_c0_g2_i1	YP_010804160.1	3034	45.955	618	312	10	795	2624	43	646	1.02e-166	506	long-chain fatty acid CoA synthetase [Fadolivirusalgeromassiliense].	Fadolivirus algeromassiliense	Viruses;Varidnaviria;Bamfordvirae;Nucleocytoviricota;Megaviricetes;Imitervirales;Mimiviridae;Klosneuvirinae;Fadolivirus.	Mimiviridae	dsDNA
TRINITY_DN2011_c12_g7_i1	YP_010804160.1	2900	45.955	618	312	10	661	2490	43	646	3.27e-167	506	long-chain fatty acid CoA synthetase [Fadolivirusalgeromassiliense].	Fadolivirus algeromassiliense	Viruses;Varidnaviria;Bamfordvirae;Nucleocytoviricota;Megaviricetes;Imitervirales;Mimiviridae;Klosneuvirinae;Fadolivirus.	Mimiviridae	dsDNA
TRINITY_DN61414_c1_g1_i1	YP_009173627.1	3508	62.075	617	225	6	457	2295	3	614	0	694	Hsp70 protein [Chrysochromulina ericina virus].	Chrysochromulina ericina virus	Viruses;Varidnaviria;Bamfordvirae;Nucleocytoviricota;Megaviricetes;Algavirales;Phycodnaviridae.	Phycodnaviridae	dsDNA
TRINITY_DN50934_c0_g1_i1	YP_009173627.1	3420	62.075	617	225	6	369	2207	3	614	0	694	Hsp70 protein [Chrysochromulina ericina virus].	Chrysochromulina ericina virus	Viruses;Varidnaviria;Bamfordvirae;Nucleocytoviricota;Megaviricetes;Algavirales;Phycodnaviridae.	Phycodnaviridae	dsDNA
TRINITY_DN5050_c0_g1_i3	NP_048448.2	2316	40.519	617	334	10	217	2040	1	593	2.72e-137	421	Glutamine:fructose-6-phosphate amidotransferase [Parameciumbursaria Chlorella virus 1].	Paramecium bursaria Chlorella virus 1	Viruses;Varidnaviria;Bamfordvirae;Nucleocytoviricota;Megaviricetes;Algavirales;Phycodnaviridae;Chlorovirus.	Phycodnaviridae	dsDNA
TRINITY_DN4217_c0_g1_i6	YP_009173627.1	4800	50.487	616	276	13	1387	3168	2	610	8.58e-162	509	Hsp70 protein [Chrysochromulina ericina virus].	Chrysochromulina ericina virus	Viruses;Varidnaviria;Bamfordvirae;Nucleocytoviricota;Megaviricetes;Algavirales;Phycodnaviridae.	Phycodnaviridae	dsDNA
TRINITY_DN1030_c0_g1_i3	YP_010796961.1	4043	27.597	616	369	21	1766	36	460	1037	3.63e-34	146	PolB [Mayetiola barley midge adintovirus].	Mayetiola barley midge adintovirus	Viruses;Varidnaviria;Bamfordvirae;Preplasmiviricota;Polintoviricetes;Orthopolintovirales;Adintoviridae;Alphadintovirus;Alphadintovirusmayetiola.	Adintoviridae	dsDNA
TRINITY_DN1030_c0_g1_i1	YP_009173627.1	3759	50.487	616	276	13	346	2127	2	610	1e-164	509	Hsp70 protein [Chrysochromulina ericina virus].	Chrysochromulina ericina virus	Viruses;Varidnaviria;Bamfordvirae;Nucleocytoviricota;Megaviricetes;Algavirales;Phycodnaviridae.	Phycodnaviridae	dsDNA
TRINITY_DN1030_c0_g1_i4	YP_010796961.1	3596	27.597	616	369	21	1766	36	460	1037	2.86e-34	146	PolB [Mayetiola barley midge adintovirus].	Mayetiola barley midge adintovirus	Viruses;Varidnaviria;Bamfordvirae;Preplasmiviricota;Polintoviricetes;Orthopolintovirales;Adintoviridae;Alphadintovirus;Alphadintovirusmayetiola.	Adintoviridae	dsDNA
TRINITY_DN7508_c0_g1_i13	YP_010803161.1	2367	33.171	615	379	8	346	2145	6	603	1.38e-92	313	peptidase M16 [Fadolivirus algeromassiliense].	Fadolivirus algeromassiliense	Viruses;Varidnaviria;Bamfordvirae;Nucleocytoviricota;Megaviricetes;Imitervirales;Mimiviridae;Klosneuvirinae;Fadolivirus.	Mimiviridae	dsDNA
TRINITY_DN1241_c0_g1_i13	YP_010788465.1	4952	32.79	613	264	13	4532	2796	558	1056	1.73e-17	92.8	collagen-like protein [Megavirus baoshan].	Megavirus baoshan	Viruses;Varidnaviria;Bamfordvirae;Nucleocytoviricota;Megaviricetes;Imitervirales;Mimiviridae;Megamimivirinae;Megavirus;Megavirusbaoshanense.	Mimiviridae	dsDNA
TRINITY_DN61414_c1_g1_i7	YP_010780181.1	4622	32.79	613	356	19	4537	2729	3	569	4.83e-79	283	hypothetical protein QJ856_gp1184 [Tupanvirus deep ocean].	Tupanvirus deep ocean	Viruses;Varidnaviria;Bamfordvirae;Nucleocytoviricota;Megaviricetes;Imitervirales;Mimiviridae;Megamimivirinae;Tupanvirus.	Mimiviridae	dsDNA
TRINITY_DN41597_c0_g1_i2	YP_010788696.1	2619	28.548	613	369	16	232	1989	28	598	2.6e-68	243	ATP-dependent RNA helicase [Megavirus baoshan].	Megavirus baoshan	Viruses;Varidnaviria;Bamfordvirae;Nucleocytoviricota;Megaviricetes;Imitervirales;Mimiviridae;Megamimivirinae;Megavirus;Megavirusbaoshanense.	Mimiviridae	dsDNA
TRINITY_DN41597_c0_g1_i6	YP_004061438.1	3728	46.895	612	301	9	3368	1572	1	601	3.22e-171	524	hypothetical protein BpV1_008c [Bathycoccus sp. RCC1105 virusBpV1].	Bathycoccus sp. RCC1105 virus BpV1	Viruses;Varidnaviria;Bamfordvirae;Nucleocytoviricota;Megaviricetes;Algavirales;Phycodnaviridae;Prasinovirus;Bathycoccussp.RCC1105virusBpV.	Phycodnaviridae	dsDNA
TRINITY_DN38827_c0_g1_i2	YP_009173627.1	2633	70.752	612	178	1	406	2238	3	614	0	843	Hsp70 protein [Chrysochromulina ericina virus].	Chrysochromulina ericina virus	Viruses;Varidnaviria;Bamfordvirae;Nucleocytoviricota;Megaviricetes;Algavirales;Phycodnaviridae.	Phycodnaviridae	dsDNA
TRINITY_DN41597_c0_g1_i8	YP_009173627.1	2443	66.83	612	199	3	326	2152	6	616	0	835	Hsp70 protein [Chrysochromulina ericina virus].	Chrysochromulina ericina virus	Viruses;Varidnaviria;Bamfordvirae;Nucleocytoviricota;Megaviricetes;Algavirales;Phycodnaviridae.	Phycodnaviridae	dsDNA
TRINITY_DN19341_c0_g1_i1	YP_010803676.1	2325	35.188	611	355	8	2079	322	35	629	5.61e-112	361	valyl-tRNA synthetase [Fadolivirus algeromassiliense].	Fadolivirus algeromassiliense	Viruses;Varidnaviria;Bamfordvirae;Nucleocytoviricota;Megaviricetes;Imitervirales;Mimiviridae;Klosneuvirinae;Fadolivirus.	Mimiviridae	dsDNA
TRINITY_DN3640_c0_g1_i4	YP_009173627.1	2792	47.869	610	297	11	2712	928	10	613	0	547	Hsp70 protein [Chrysochromulina ericina virus].	Chrysochromulina ericina virus	Viruses;Varidnaviria;Bamfordvirae;Nucleocytoviricota;Megaviricetes;Algavirales;Phycodnaviridae.	Phycodnaviridae	dsDNA
TRINITY_DN3640_c0_g1_i6	YP_010803544.1	2422	42.2	609	325	8	2128	353	1	599	5.3e-160	481	RNAse l inhibitor RLI1 [Fadolivirus algeromassiliense].	Fadolivirus algeromassiliense	Viruses;Varidnaviria;Bamfordvirae;Nucleocytoviricota;Megaviricetes;Imitervirales;Mimiviridae;Klosneuvirinae;Fadolivirus.	Mimiviridae	dsDNA
TRINITY_DN3640_c0_g1_i7	YP_009001225.1	2420	25.944	609	380	15	2332	572	65	624	7.5e-52	194	ABC transporter [Pithovirus sibericum].	Pithovirus sibericum	Viruses;Pithoviruses;Pithovirus.	Pithovirus	dsDNA
TRINITY_DN3640_c0_g1_i5	YP_919062.1	2656	27.467	608	387	13	2469	667	44	604	1.76e-37	154	DNA helicase [Halorubrum virus BJ1].	Halorubrum virus BJ1	Viruses;Duplodnaviria;Heunggongvirae;Uroviricota;Caudoviricetes;Kirjokansivirales;Graaviviridae;Beejeyvirus;BeejeyvirusBJ1.	Graaviviridae	dsDNA
TRINITY_DN16039_c0_g1_i11	YP_010780181.1	3000	31.796	607	356	20	173	1963	5	563	1.17e-66	243	hypothetical protein QJ856_gp1184 [Tupanvirus deep ocean].	Tupanvirus deep ocean	Viruses;Varidnaviria;Bamfordvirae;Nucleocytoviricota;Megaviricetes;Imitervirales;Mimiviridae;Megamimivirinae;Tupanvirus.	Mimiviridae	dsDNA
TRINITY_DN22474_c0_g1_i8	YP_010796961.1	2943	34.926	607	337	17	2931	1177	297	867	3.98e-135	277	PolB [Mayetiola barley midge adintovirus].	Mayetiola barley midge adintovirus	Viruses;Varidnaviria;Bamfordvirae;Preplasmiviricota;Polintoviricetes;Orthopolintovirales;Adintoviridae;Alphadintovirus;Alphadintovirusmayetiola.	Adintoviridae	dsDNA
TRINITY_DN1802_c0_g1_i6	YP_009173627.1	2394	66.063	607	202	3	251	2062	9	614	0	771	Hsp70 protein [Chrysochromulina ericina virus].	Chrysochromulina ericina virus	Viruses;Varidnaviria;Bamfordvirae;Nucleocytoviricota;Megaviricetes;Algavirales;Phycodnaviridae.	Phycodnaviridae	dsDNA
TRINITY_DN50053_c0_g1_i11	YP_009173627.1	2335	66.063	607	202	3	251	2062	9	614	0	771	Hsp70 protein [Chrysochromulina ericina virus].	Chrysochromulina ericina virus	Viruses;Varidnaviria;Bamfordvirae;Nucleocytoviricota;Megaviricetes;Algavirales;Phycodnaviridae.	Phycodnaviridae	dsDNA
TRINITY_DN61900_c0_g1_i15	YP_009173627.1	2325	66.063	607	202	3	241	2052	9	614	0	771	Hsp70 protein [Chrysochromulina ericina virus].	Chrysochromulina ericina virus	Viruses;Varidnaviria;Bamfordvirae;Nucleocytoviricota;Megaviricetes;Algavirales;Phycodnaviridae.	Phycodnaviridae	dsDNA
TRINITY_DN9400_c0_g1_i17	YP_010788465.1	2000	30.643	607	266	12	1862	81	417	881	1e-14	82	collagen-like protein [Megavirus baoshan].	Megavirus baoshan	Viruses;Varidnaviria;Bamfordvirae;Nucleocytoviricota;Megaviricetes;Imitervirales;Mimiviridae;Megamimivirinae;Megavirus;Megavirusbaoshanense.	Mimiviridae	dsDNA
TRINITY_DN9400_c0_g1_i11	YP_010780309.1	4492	26.368	603	368	18	4019	2274	1037	1584	4.52e-38	160	NcpA [Tupanvirus deep ocean].	Tupanvirus deep ocean	Viruses;Varidnaviria;Bamfordvirae;Nucleocytoviricota;Megaviricetes;Imitervirales;Mimiviridae;Megamimivirinae;Tupanvirus.	Mimiviridae	dsDNA
TRINITY_DN9400_c0_g1_i5	YP_010780309.1	4300	26.368	603	368	18	4019	2274	1037	1584	3.59e-38	160	NcpA [Tupanvirus deep ocean].	Tupanvirus deep ocean	Viruses;Varidnaviria;Bamfordvirae;Nucleocytoviricota;Megaviricetes;Imitervirales;Mimiviridae;Megamimivirinae;Tupanvirus.	Mimiviridae	dsDNA
TRINITY_DN4203_c2_g1_i3	YP_010780309.1	3347	26.368	603	368	18	3066	1321	1037	1584	1.99e-38	160	NcpA [Tupanvirus deep ocean].	Tupanvirus deep ocean	Viruses;Varidnaviria;Bamfordvirae;Nucleocytoviricota;Megaviricetes;Imitervirales;Mimiviridae;Megamimivirinae;Tupanvirus.	Mimiviridae	dsDNA
TRINITY_DN3791_c0_g1_i32	YP_010780309.1	2813	26.368	603	368	18	2532	787	1037	1584	1.24e-38	160	NcpA [Tupanvirus deep ocean].	Tupanvirus deep ocean	Viruses;Varidnaviria;Bamfordvirae;Nucleocytoviricota;Megaviricetes;Imitervirales;Mimiviridae;Megamimivirinae;Tupanvirus.	Mimiviridae	dsDNA
TRINITY_DN4808_c0_g1_i19	YP_010782239.1	2541	42.123	603	335	5	1888	83	444	1033	3.03e-147	462	putative ATP-citrate synthase [Tupanvirus soda lake].	Tupanvirus soda lake	Viruses;Varidnaviria;Bamfordvirae;Nucleocytoviricota;Megaviricetes;Imitervirales;Mimiviridae;Megamimivirinae;Tupanvirus.	Mimiviridae	dsDNA
TRINITY_DN60771_c0_g1_i10	YP_009329403.1	1876	27.861	603	388	17	1824	67	12	584	4.87e-55	200	ABC transporter, partial [Cedratvirus A11].	Cedratvirus A11	Viruses;Pithoviruses.	Pithoviruses	dsDNA
TRINITY_DN60771_c0_g1_i6	YP_010778015.1	4643	40.532	602	343	6	2353	560	124	714	1.11e-133	434	translation initiation factor IF-2 [Bodo saltans virus].	Bodo saltans virus	Viruses;Varidnaviria;Bamfordvirae;Nucleocytoviricota;Megaviricetes;Imitervirales;Mimiviridae;Klosneuvirinae;Theiavirus;Theiavirussalishense.	Mimiviridae	dsDNA
TRINITY_DN2002_c0_g1_i3	YP_010778015.1	4360	40.532	602	343	6	2068	275	124	714	7.6e-134	433	translation initiation factor IF-2 [Bodo saltans virus].	Bodo saltans virus	Viruses;Varidnaviria;Bamfordvirae;Nucleocytoviricota;Megaviricetes;Imitervirales;Mimiviridae;Klosneuvirinae;Theiavirus;Theiavirussalishense.	Mimiviridae	dsDNA
TRINITY_DN3882_c0_g1_i1	YP_010788465.1	2000	29.734	602	236	12	1865	75	356	775	8.4e-20	98.2	collagen-like protein [Megavirus baoshan].	Megavirus baoshan	Viruses;Varidnaviria;Bamfordvirae;Nucleocytoviricota;Megaviricetes;Imitervirales;Mimiviridae;Megamimivirinae;Megavirus;Megavirusbaoshanense.	Mimiviridae	dsDNA
TRINITY_DN5074_c0_g1_i10	YP_009665578.1	4251	21.667	600	360	15	782	2545	129	630	1.49e-11	72.8	ATPase [Paramecium bursaria Chlorella virus NYs1].	Paramecium bursaria Chlorella virus NYs1	Viruses;Varidnaviria;Bamfordvirae;Nucleocytoviricota;Megaviricetes;Algavirales;Phycodnaviridae;Chlorovirus.	Phycodnaviridae	dsDNA
TRINITY_DN9400_c0_g1_i1	YP_010778015.1	4196	37.667	600	309	6	1906	275	124	714	6.69e-117	386	translation initiation factor IF-2 [Bodo saltans virus].	Bodo saltans virus	Viruses;Varidnaviria;Bamfordvirae;Nucleocytoviricota;Megaviricetes;Imitervirales;Mimiviridae;Klosneuvirinae;Theiavirus;Theiavirussalishense.	Mimiviridae	dsDNA
TRINITY_DN4486_c0_g2_i3	YP_004061438.1	2516	47.667	600	291	9	69	1835	1	588	1.26e-174	521	hypothetical protein BpV1_008c [Bathycoccus sp. RCC1105 virusBpV1].	Bathycoccus sp. RCC1105 virus BpV1	Viruses;Varidnaviria;Bamfordvirae;Nucleocytoviricota;Megaviricetes;Algavirales;Phycodnaviridae;Prasinovirus;Bathycoccussp.RCC1105virusBpV.	Phycodnaviridae	dsDNA
TRINITY_DN5158_c0_g1_i1	YP_003970022.1	6076	23.873	599	402	13	3120	1393	238	805	2.35e-28	128	putative superfamily II RNA helicase [Cafeteria roenbergensis virusBV-PW1].	Cafeteria roenbergensis virus BV-PW1	Viruses;Varidnaviria;Bamfordvirae;Nucleocytoviricota;Megaviricetes;Imitervirales;Mimiviridae;Aliimimivirinae;Rheavirus;Rheavirussinusmexicani.	Mimiviridae	dsDNA
TRINITY_DN61900_c0_g1_i2	YP_003970022.1	5957	23.873	599	402	13	3120	1393	238	805	2.29e-28	128	putative superfamily II RNA helicase [Cafeteria roenbergensis virusBV-PW1].	Cafeteria roenbergensis virus BV-PW1	Viruses;Varidnaviria;Bamfordvirae;Nucleocytoviricota;Megaviricetes;Imitervirales;Mimiviridae;Aliimimivirinae;Rheavirus;Rheavirussinusmexicani.	Mimiviridae	dsDNA
TRINITY_DN5465_c0_g1_i2	YP_003970022.1	5635	23.873	599	402	13	3120	1393	238	805	2.12e-28	128	putative superfamily II RNA helicase [Cafeteria roenbergensis virusBV-PW1].	Cafeteria roenbergensis virus BV-PW1	Viruses;Varidnaviria;Bamfordvirae;Nucleocytoviricota;Megaviricetes;Imitervirales;Mimiviridae;Aliimimivirinae;Rheavirus;Rheavirussinusmexicani.	Mimiviridae	dsDNA
TRINITY_DN5465_c0_g1_i23	YP_003970022.1	5335	23.873	599	402	13	2820	1093	238	805	1.96e-28	128	putative superfamily II RNA helicase [Cafeteria roenbergensis virusBV-PW1].	Cafeteria roenbergensis virus BV-PW1	Viruses;Varidnaviria;Bamfordvirae;Nucleocytoviricota;Megaviricetes;Imitervirales;Mimiviridae;Aliimimivirinae;Rheavirus;Rheavirussinusmexicani.	Mimiviridae	dsDNA
TRINITY_DN27054_c0_g1_i40	YP_010778125.1	4284	27.546	599	345	14	698	2431	6	536	5.82e-41	166	putative ATP-dependent RNA helicase [Bodo saltans virus].	Bodo saltans virus	Viruses;Varidnaviria;Bamfordvirae;Nucleocytoviricota;Megaviricetes;Imitervirales;Mimiviridae;Klosneuvirinae;Theiavirus;Theiavirussalishense.	Mimiviridae	dsDNA
TRINITY_DN5465_c0_g1_i13	YP_010803112.1	1965	20.234	598	411	17	1845	196	100	679	1.76e-34	143	peptidase M3AM3B [Fadolivirus algeromassiliense].	Fadolivirus algeromassiliense	Viruses;Varidnaviria;Bamfordvirae;Nucleocytoviricota;Megaviricetes;Imitervirales;Mimiviridae;Klosneuvirinae;Fadolivirus.	Mimiviridae	dsDNA
TRINITY_DN9400_c0_g1_i4	YP_010803663.1	2373	36.683	597	353	11	1944	178	4	583	3.31e-131	405	class II glycyl-tRNA synthetase [Fadolivirus algeromassiliense].	Fadolivirus algeromassiliense	Viruses;Varidnaviria;Bamfordvirae;Nucleocytoviricota;Megaviricetes;Imitervirales;Mimiviridae;Klosneuvirinae;Fadolivirus.	Mimiviridae	dsDNA
TRINITY_DN261130_c0_g1_i1	YP_010779185.1	3351	26.678	596	358	20	420	2114	79	626	1.24e-27	124	repeat protein [Moumouvirus goulette].	Moumouvirus goulette	Viruses;Varidnaviria;Bamfordvirae;Nucleocytoviricota;Megaviricetes;Imitervirales;Mimiviridae;Megamimivirinae;Moumouvirus;Moumouvirusgoulettemassiliense.	Mimiviridae	dsDNA
TRINITY_DN13342_c0_g1_i8	YP_010782577.1	2175	27.013	596	368	16	1867	128	329	873	2.86e-54	204	hypothetical protein QJ857_gp0130 [Tupanvirus soda lake].	Tupanvirus soda lake	Viruses;Varidnaviria;Bamfordvirae;Nucleocytoviricota;Megaviricetes;Imitervirales;Mimiviridae;Megamimivirinae;Tupanvirus.	Mimiviridae	dsDNA
TRINITY_DN18571_c0_g1_i1	YP_010781422.1	2335	28.908	595	298	25	1723	251	119	692	1.79e-37	153	glucose-methanol-choline oxidoreductase [Tupanvirus soda lake].	Tupanvirus soda lake	Viruses;Varidnaviria;Bamfordvirae;Nucleocytoviricota;Megaviricetes;Imitervirales;Mimiviridae;Megamimivirinae;Tupanvirus.	Mimiviridae	dsDNA
TRINITY_DN39471_c0_g1_i1	YP_010781422.1	2313	28.908	595	298	25	1723	251	119	692	1.71e-37	153	glucose-methanol-choline oxidoreductase [Tupanvirus soda lake].	Tupanvirus soda lake	Viruses;Varidnaviria;Bamfordvirae;Nucleocytoviricota;Megaviricetes;Imitervirales;Mimiviridae;Megamimivirinae;Tupanvirus.	Mimiviridae	dsDNA
TRINITY_DN27042_c0_g1_i12	YP_010788465.1	2000	29.412	595	257	11	1862	93	477	913	1.46e-17	90.9	collagen-like protein [Megavirus baoshan].	Megavirus baoshan	Viruses;Varidnaviria;Bamfordvirae;Nucleocytoviricota;Megaviricetes;Imitervirales;Mimiviridae;Megamimivirinae;Megavirus;Megavirusbaoshanense.	Mimiviridae	dsDNA
TRINITY_DN39005_c0_g1_i7	YP_010781422.1	1927	28.908	595	298	25	1723	251	119	692	1.48e-37	152	glucose-methanol-choline oxidoreductase [Tupanvirus soda lake].	Tupanvirus soda lake	Viruses;Varidnaviria;Bamfordvirae;Nucleocytoviricota;Megaviricetes;Imitervirales;Mimiviridae;Megamimivirinae;Tupanvirus.	Mimiviridae	dsDNA
TRINITY_DN21105_c0_g1_i1	YP_010802886.1	3013	41.919	594	287	12	441	2216	81	618	2.93e-137	429	GMP synthetase glutamine amidotransferase and ATP pyrophosphatasedomain protein [Fadolivirus algeromassiliense].	Fadolivirus algeromassiliense	Viruses;Varidnaviria;Bamfordvirae;Nucleocytoviricota;Megaviricetes;Imitervirales;Mimiviridae;Klosneuvirinae;Fadolivirus.	Mimiviridae	dsDNA
TRINITY_DN25948_c0_g1_i21	YP_009325865.1	2526	32.209	593	320	23	670	2364	114	652	8.5e-63	230	ATPase [Only Syngen Nebraska virus 5].	Only Syngen Nebraska virus 5	Viruses;Varidnaviria;Bamfordvirae;Nucleocytoviricota;Megaviricetes;Algavirales;Phycodnaviridae;Chlorovirus.	Phycodnaviridae	dsDNA
TRINITY_DN7290_c0_g1_i14	YP_010780181.1	2553	33.503	591	334	19	2364	622	28	569	1.38e-79	277	hypothetical protein QJ856_gp1184 [Tupanvirus deep ocean].	Tupanvirus deep ocean	Viruses;Varidnaviria;Bamfordvirae;Nucleocytoviricota;Megaviricetes;Imitervirales;Mimiviridae;Megamimivirinae;Tupanvirus.	Mimiviridae	dsDNA
TRINITY_DN66844_c0_g1_i5	NP_073525.1	3574	22.542	590	400	13	481	2208	10	556	1.48e-39	159	140R protein [Yaba-like disease virus].	Yaba-like disease virus	Viruses;Varidnaviria;Bamfordvirae;Nucleocytoviricota;Pokkesviricetes;Chitovirales;Poxviridae;Chordopoxvirinae;Yatapoxvirus;Tanapoxvirus.	Poxviridae	dsDNA
TRINITY_DN7290_c0_g1_i24	NP_073525.1	3325	22.542	590	400	13	232	1959	10	556	1.21e-39	159	140R protein [Yaba-like disease virus].	Yaba-like disease virus	Viruses;Varidnaviria;Bamfordvirae;Nucleocytoviricota;Pokkesviricetes;Chitovirales;Poxviridae;Chordopoxvirinae;Yatapoxvirus;Tanapoxvirus.	Poxviridae	dsDNA
TRINITY_DN23357_c0_g1_i9	YP_009483690.1	1986	25.593	590	320	21	1850	246	43	568	5.66e-38	152	Carboxylic ester hydrolase [Pandoravirus quercus].	Pandoravirus quercus	Viruses;Pandoravirus.	Pandoravirus	dsDNA
TRINITY_DN25948_c0_g1_i14	YP_009173627.1	2364	63.497	589	213	2	2062	299	5	592	0	729	Hsp70 protein [Chrysochromulina ericina virus].	Chrysochromulina ericina virus	Viruses;Varidnaviria;Bamfordvirae;Nucleocytoviricota;Megaviricetes;Algavirales;Phycodnaviridae.	Phycodnaviridae	dsDNA
TRINITY_DN25948_c0_g1_i13	YP_010841542.1	5878	39.286	588	286	9	2405	4090	276	818	6.96e-31	136	collagen-like protein [Cotonvirus japonicus].	Cotonvirus japonicus	Viruses;Varidnaviria;Bamfordvirae;Nucleocytoviricota;Megaviricetes;Imitervirales;Mimiviridae;Megamimivirinae;Cotonvirus;Cotonvirusjaponicum.	Mimiviridae	dsDNA
TRINITY_DN23357_c0_g1_i4	YP_008052594.1	3014	22.959	588	361	17	454	2046	25	577	8.92e-22	105	DNA topoisomerase I [Phaeocystis globosa virus].	Phaeocystis globosa virus	Viruses;Varidnaviria;Bamfordvirae;Nucleocytoviricota;Megaviricetes;Algavirales;Phycodnaviridae;Prymnesiovirus.	Phycodnaviridae	dsDNA
TRINITY_DN39670_c0_g2_i1	YP_010781422.1	2574	29.082	588	294	24	1962	505	119	685	7.39e-37	151	glucose-methanol-choline oxidoreductase [Tupanvirus soda lake].	Tupanvirus soda lake	Viruses;Varidnaviria;Bamfordvirae;Nucleocytoviricota;Megaviricetes;Imitervirales;Mimiviridae;Megamimivirinae;Tupanvirus.	Mimiviridae	dsDNA
TRINITY_DN7509_c0_g1_i1	YP_003969699.1	2323	27.211	588	358	16	511	2220	2	537	1.22e-51	193	putative metalloendopeptidase [Cafeteria roenbergensis virusBV-PW1].	Cafeteria roenbergensis virus BV-PW1	Viruses;Varidnaviria;Bamfordvirae;Nucleocytoviricota;Megaviricetes;Imitervirales;Mimiviridae;Aliimimivirinae;Rheavirus;Rheavirussinusmexicani.	Mimiviridae	dsDNA
TRINITY_DN295_c0_g2_i9	YP_010841542.1	5878	36.519	586	267	12	2399	4090	94	596	7.11e-24	114	collagen-like protein [Cotonvirus japonicus].	Cotonvirus japonicus	Viruses;Varidnaviria;Bamfordvirae;Nucleocytoviricota;Megaviricetes;Imitervirales;Mimiviridae;Megamimivirinae;Cotonvirus;Cotonvirusjaponicum.	Mimiviridae	dsDNA
TRINITY_DN295_c0_g2_i1	YP_010788465.1	4952	32.423	586	252	14	4532	2790	567	1013	2.17e-21	105	collagen-like protein [Megavirus baoshan].	Megavirus baoshan	Viruses;Varidnaviria;Bamfordvirae;Nucleocytoviricota;Megaviricetes;Imitervirales;Mimiviridae;Megamimivirinae;Megavirus;Megavirusbaoshanense.	Mimiviridae	dsDNA
TRINITY_DN295_c0_g2_i14	NP_039006.1	2615	28.328	586	360	22	2284	575	2	543	9.4e-38	152	DNA ligase [Fowlpox virus].	Fowlpox virus	Viruses;Varidnaviria;Bamfordvirae;Nucleocytoviricota;Pokkesviricetes;Chitovirales;Poxviridae;Chordopoxvirinae;Avipoxvirus.	Poxviridae	dsDNA
TRINITY_DN295_c0_g2_i4	YP_010782577.1	4965	26.667	585	365	13	4657	2945	329	863	1.3e-52	205	hypothetical protein QJ857_gp0130 [Tupanvirus soda lake].	Tupanvirus soda lake	Viruses;Varidnaviria;Bamfordvirae;Nucleocytoviricota;Megaviricetes;Imitervirales;Mimiviridae;Megamimivirinae;Tupanvirus.	Mimiviridae	dsDNA
TRINITY_DN295_c0_g2_i5	YP_010778125.1	3907	24.957	585	346	15	2476	800	44	561	8.61e-39	159	putative ATP-dependent RNA helicase [Bodo saltans virus].	Bodo saltans virus	Viruses;Varidnaviria;Bamfordvirae;Nucleocytoviricota;Megaviricetes;Imitervirales;Mimiviridae;Klosneuvirinae;Theiavirus;Theiavirussalishense.	Mimiviridae	dsDNA
TRINITY_DN6670_c0_g1_i11	YP_010778125.1	3863	24.957	585	346	15	2476	800	44	561	1.02e-38	158	putative ATP-dependent RNA helicase [Bodo saltans virus].	Bodo saltans virus	Viruses;Varidnaviria;Bamfordvirae;Nucleocytoviricota;Megaviricetes;Imitervirales;Mimiviridae;Klosneuvirinae;Theiavirus;Theiavirussalishense.	Mimiviridae	dsDNA
TRINITY_DN231154_c0_g1_i3	YP_010803676.1	3793	28.889	585	327	10	1315	3069	268	763	2.2e-74	267	valyl-tRNA synthetase [Fadolivirus algeromassiliense].	Fadolivirus algeromassiliense	Viruses;Varidnaviria;Bamfordvirae;Nucleocytoviricota;Megaviricetes;Imitervirales;Mimiviridae;Klosneuvirinae;Fadolivirus.	Mimiviridae	dsDNA
TRINITY_DN166155_c0_g2_i5	YP_010778125.1	2737	24.957	585	346	15	2476	800	44	561	2.33e-39	159	putative ATP-dependent RNA helicase [Bodo saltans virus].	Bodo saltans virus	Viruses;Varidnaviria;Bamfordvirae;Nucleocytoviricota;Megaviricetes;Imitervirales;Mimiviridae;Klosneuvirinae;Theiavirus;Theiavirussalishense.	Mimiviridae	dsDNA
TRINITY_DN97132_c1_g1_i6	YP_010788625.1	1951	27.911	584	289	22	1950	511	121	676	1.14e-35	146	glucose-methanol-choline oxidoreductase [Megavirus baoshan].	Megavirus baoshan	Viruses;Varidnaviria;Bamfordvirae;Nucleocytoviricota;Megaviricetes;Imitervirales;Mimiviridae;Megamimivirinae;Megavirus;Megavirusbaoshanense.	Mimiviridae	dsDNA
TRINITY_DN97132_c1_g1_i3	YP_010777010.1	2167	28.055	581	322	25	414	1991	190	729	4.11e-31	134	putative ankyrin repeat protein [Acanthamoeba polyphaga mimivirus].	Acanthamoeba polyphaga mimivirus	Viruses;Varidnaviria;Bamfordvirae;Nucleocytoviricota;Megaviricetes;Imitervirales;Mimiviridae;Megamimivirinae;Mimivirus;Mimivirusbradfordmassiliense.	Mimiviridae	dsDNA
TRINITY_DN27125_c0_g1_i1	YP_010776576.1	1590	29.088	581	295	22	1583	129	128	687	1.53e-41	161	hypothetical protein QJ849_gp663 [Powai lake megavirus].	Powai lake megavirus	Viruses;Varidnaviria;Bamfordvirae;Nucleocytoviricota;Megaviricetes;Imitervirales;Mimiviridae;Megamimivirinae;Megavirus;Megaviruspowaiense.	Mimiviridae	dsDNA
TRINITY_DN97132_c1_g1_i2	YP_009448418.1	2412	34.483	580	321	15	330	1928	38	605	1.1e-89	298	Arginyl-tRNA synthetase [Orpheovirus IHUMI-LCC2].	Orpheovirus IHUMI-LCC2	Viruses;Varidnaviria;Bamfordvirae;Nucleocytoviricota;Megaviricetes;Algavirales;Phycodnaviridae.	Phycodnaviridae	dsDNA
TRINITY_DN9868_c3_g1_i1	YP_003986584.1	2158	27.069	580	365	21	420	2066	192	744	7.07e-30	130	putative ankyrin repeat protein [Acanthamoeba polyphaga mimivirus].	Acanthamoeba polyphaga mimivirus	Viruses;Varidnaviria;Bamfordvirae;Nucleocytoviricota;Megaviricetes;Imitervirales;Mimiviridae;Megamimivirinae;Mimivirus;Mimivirusbradfordmassiliense.	Mimiviridae	dsDNA
TRINITY_DN890_c0_g1_i21	YP_010781593.1	2534	27.903	577	361	20	512	2152	46	597	8.67e-42	166	HrpA-like helicase [Tupanvirus soda lake].	Tupanvirus soda lake	Viruses;Varidnaviria;Bamfordvirae;Nucleocytoviricota;Megaviricetes;Imitervirales;Mimiviridae;Megamimivirinae;Tupanvirus.	Mimiviridae	dsDNA
TRINITY_DN1918_c0_g1_i4	YP_010842031.1	2339	27.556	577	317	22	1887	424	103	667	8.99e-37	150	glucose-methanol-choline oxidoreductase [Cotonvirus japonicus].	Cotonvirus japonicus	Viruses;Varidnaviria;Bamfordvirae;Nucleocytoviricota;Megaviricetes;Imitervirales;Mimiviridae;Megamimivirinae;Cotonvirus;Cotonvirusjaponicum.	Mimiviridae	dsDNA
TRINITY_DN7891_c0_g1_i4	YP_009329013.1	2278	22.357	577	365	21	2038	410	18	545	2.43e-22	106	serine-threonine kinase [Cedratvirus A11].	Cedratvirus A11	Viruses;Pithoviruses.	Pithoviruses	dsDNA
TRINITY_DN1918_c0_g1_i6	YP_009173631.1	2736	38.542	576	310	16	2517	850	1	552	1.12e-109	352	asparagine synthetase B [Chrysochromulina ericina virus].	Chrysochromulina ericina virus	Viruses;Varidnaviria;Bamfordvirae;Nucleocytoviricota;Megaviricetes;Algavirales;Phycodnaviridae.	Phycodnaviridae	dsDNA
TRINITY_DN1918_c0_g1_i1	YP_009329403.1	2256	26.91	576	366	12	105	1784	54	590	2.28e-53	197	ABC transporter, partial [Cedratvirus A11].	Cedratvirus A11	Viruses;Pithoviruses.	Pithoviruses	dsDNA
TRINITY_DN7290_c0_g1_i5	YP_010779322.1	3089	29.739	575	295	23	397	1842	117	675	7.39e-39	158	oxidoreductase [Moumouvirus goulette].	Moumouvirus goulette	Viruses;Varidnaviria;Bamfordvirae;Nucleocytoviricota;Megaviricetes;Imitervirales;Mimiviridae;Megamimivirinae;Moumouvirus;Moumouvirusgoulettemassiliense.	Mimiviridae	dsDNA
TRINITY_DN98_c1_g1_i2	NP_612286.1	2952	28	575	305	21	308	2011	4	476	1.27e-51	192	putative RNA guanylytransferase [Infectious spleen and kidneynecrosis virus].	Infectious spleen and kidney necrosis virus	Viruses;Varidnaviria;Bamfordvirae;Nucleocytoviricota;Megaviricetes;Pimascovirales;Iridoviridae;Alphairidovirinae;Megalocytivirus.	Iridoviridae	dsDNA
TRINITY_DN3427_c0_g1_i3	YP_010802560.1	2459	59.13	575	225	2	569	2287	23	589	0	729	DNA ligase III [Chrysodeixis includens nucleopolyhedrovirus].	Chrysodeixis includens nucleopolyhedrovirus	Viruses;Naldaviricetes;Lefavirales;Baculoviridae;Alphabaculovirus;Alphabaculovirusalterchrincludentis.	Baculoviridae	dsDNA
TRINITY_DN41699_c3_g1_i14	NP_612286.1	2394	28	575	305	21	308	2011	4	476	3.64e-52	192	putative RNA guanylytransferase [Infectious spleen and kidneynecrosis virus].	Infectious spleen and kidney necrosis virus	Viruses;Varidnaviria;Bamfordvirae;Nucleocytoviricota;Megaviricetes;Pimascovirales;Iridoviridae;Alphairidovirinae;Megalocytivirus.	Iridoviridae	dsDNA
TRINITY_DN4217_c0_g1_i1	YP_010782446.1	4040	29.268	574	352	10	3558	1873	3	534	1.88e-61	226	putative acyl-CoA oxidase [Tupanvirus soda lake].	Tupanvirus soda lake	Viruses;Varidnaviria;Bamfordvirae;Nucleocytoviricota;Megaviricetes;Imitervirales;Mimiviridae;Megamimivirinae;Tupanvirus.	Mimiviridae	dsDNA
TRINITY_DN105685_c0_g1_i1	YP_010779322.1	3573	29.791	574	294	23	881	2323	117	674	1.53e-38	157	oxidoreductase [Moumouvirus goulette].	Moumouvirus goulette	Viruses;Varidnaviria;Bamfordvirae;Nucleocytoviricota;Megaviricetes;Imitervirales;Mimiviridae;Megamimivirinae;Moumouvirus;Moumouvirusgoulettemassiliense.	Mimiviridae	dsDNA
TRINITY_DN6102_c0_g1_i2	YP_010779322.1	3311	29.791	574	294	23	619	2061	117	674	1.33e-38	157	oxidoreductase [Moumouvirus goulette].	Moumouvirus goulette	Viruses;Varidnaviria;Bamfordvirae;Nucleocytoviricota;Megaviricetes;Imitervirales;Mimiviridae;Megamimivirinae;Moumouvirus;Moumouvirusgoulettemassiliense.	Mimiviridae	dsDNA
TRINITY_DN6102_c0_g1_i3	YP_010782446.1	2935	29.268	574	352	10	2453	768	3	534	4.13e-62	226	putative acyl-CoA oxidase [Tupanvirus soda lake].	Tupanvirus soda lake	Viruses;Varidnaviria;Bamfordvirae;Nucleocytoviricota;Megaviricetes;Imitervirales;Mimiviridae;Megamimivirinae;Tupanvirus.	Mimiviridae	dsDNA
TRINITY_DN2117_c0_g1_i7	YP_010841542.1	5878	39.442	573	264	9	2384	4087	371	865	2.01e-32	141	collagen-like protein [Cotonvirus japonicus].	Cotonvirus japonicus	Viruses;Varidnaviria;Bamfordvirae;Nucleocytoviricota;Megaviricetes;Imitervirales;Mimiviridae;Megamimivirinae;Cotonvirus;Cotonvirusjaponicum.	Mimiviridae	dsDNA
TRINITY_DN13027_c1_g1_i1	YP_010781461.1	2438	23.037	573	375	21	1757	123	301	835	3.75e-34	144	aminopeptidase M1-like [Tupanvirus soda lake].	Tupanvirus soda lake	Viruses;Varidnaviria;Bamfordvirae;Nucleocytoviricota;Megaviricetes;Imitervirales;Mimiviridae;Megamimivirinae;Tupanvirus.	Mimiviridae	dsDNA
TRINITY_DN13027_c1_g1_i6	YP_010804886.1	3354	29.371	572	349	16	1281	2945	105	638	7.07e-64	233	replication factor C large subunit [Acanthamoeba castellaniimedusavirus].	Acanthamoeba castellanii medusavirus	Viruses.	Viruses	unclassified viruses
TRINITY_DN62595_c0_g1_i2	YP_009177124.1	6269	28.497	572	324	13	5587	3998	23	551	1.05e-42	173	ankyrin repeat family protein [Turkeypox virus].	Turkeypox virus	Viruses;Varidnaviria;Bamfordvirae;Nucleocytoviricota;Pokkesviricetes;Chitovirales;Poxviridae;Chordopoxvirinae;Avipoxvirus.	Poxviridae	dsDNA
TRINITY_DN42564_c0_g1_i1	YP_009177124.1	6203	28.497	572	324	13	5521	3932	23	551	1.04e-42	173	ankyrin repeat family protein [Turkeypox virus].	Turkeypox virus	Viruses;Varidnaviria;Bamfordvirae;Nucleocytoviricota;Pokkesviricetes;Chitovirales;Poxviridae;Chordopoxvirinae;Avipoxvirus.	Poxviridae	dsDNA
TRINITY_DN1522_c2_g1_i1	YP_009177124.1	6095	28.497	572	324	13	5413	3824	23	551	1.01e-42	173	ankyrin repeat family protein [Turkeypox virus].	Turkeypox virus	Viruses;Varidnaviria;Bamfordvirae;Nucleocytoviricota;Pokkesviricetes;Chitovirales;Poxviridae;Chordopoxvirinae;Avipoxvirus.	Poxviridae	dsDNA
TRINITY_DN235368_c0_g1_i1	YP_009177124.1	5780	28.497	572	324	13	5098	3509	23	551	9.37e-43	173	ankyrin repeat family protein [Turkeypox virus].	Turkeypox virus	Viruses;Varidnaviria;Bamfordvirae;Nucleocytoviricota;Pokkesviricetes;Chitovirales;Poxviridae;Chordopoxvirinae;Avipoxvirus.	Poxviridae	dsDNA
TRINITY_DN272701_c0_g1_i1	YP_009177124.1	3571	28.497	572	324	13	2889	1300	23	551	1.75e-43	174	ankyrin repeat family protein [Turkeypox virus].	Turkeypox virus	Viruses;Varidnaviria;Bamfordvirae;Nucleocytoviricota;Pokkesviricetes;Chitovirales;Poxviridae;Chordopoxvirinae;Avipoxvirus.	Poxviridae	dsDNA
TRINITY_DN6553_c0_g1_i5	YP_010788465.1	2000	30.998	571	229	15	1865	237	569	1002	2.45e-11	70.9	collagen-like protein [Megavirus baoshan].	Megavirus baoshan	Viruses;Varidnaviria;Bamfordvirae;Nucleocytoviricota;Megaviricetes;Imitervirales;Mimiviridae;Megamimivirinae;Megavirus;Megavirusbaoshanense.	Mimiviridae	dsDNA
TRINITY_DN6553_c0_g1_i4	YP_010780309.1	1894	22.767	571	336	22	227	1861	3	494	3.41e-07	57.4	NcpA [Tupanvirus deep ocean].	Tupanvirus deep ocean	Viruses;Varidnaviria;Bamfordvirae;Nucleocytoviricota;Megaviricetes;Imitervirales;Mimiviridae;Megamimivirinae;Tupanvirus.	Mimiviridae	dsDNA
TRINITY_DN63_c0_g1_i4	YP_010780181.1	3023	31.459	569	329	15	229	1917	3	516	4.9e-65	239	hypothetical protein QJ856_gp1184 [Tupanvirus deep ocean].	Tupanvirus deep ocean	Viruses;Varidnaviria;Bamfordvirae;Nucleocytoviricota;Megaviricetes;Imitervirales;Mimiviridae;Megamimivirinae;Tupanvirus.	Mimiviridae	dsDNA
TRINITY_DN793_c0_g1_i7	YP_004894780.1	1763	26.889	569	320	20	1449	1	116	674	2.75e-41	162	glucose-methanol-choline oxidoreductase [Megavirus chiliensis].	Megavirus chiliensis	Viruses;Varidnaviria;Bamfordvirae;Nucleocytoviricota;Megaviricetes;Imitervirales;Mimiviridae;Megamimivirinae;Megavirus;Megaviruschilense.	Mimiviridae	dsDNA
TRINITY_DN793_c0_g1_i8	NP_848354.1	5034	23.063	568	315	14	2238	589	24	487	9.13e-31	132	global transactivator [Choristoneura fumiferana multiplenucleopolyhedrovirus].	Choristoneura fumiferana multiple nucleopolyhedrovirus	Viruses;Naldaviricetes;Lefavirales;Baculoviridae;Alphabaculovirus;Alphabaculoviruschofumiferanae.	Baculoviridae	dsDNA
TRINITY_DN674_c2_g4_i2	NP_848354.1	5003	23.063	568	315	14	2207	558	24	487	1.11e-30	131	global transactivator [Choristoneura fumiferana multiplenucleopolyhedrovirus].	Choristoneura fumiferana multiple nucleopolyhedrovirus	Viruses;Naldaviricetes;Lefavirales;Baculoviridae;Alphabaculovirus;Alphabaculoviruschofumiferanae.	Baculoviridae	dsDNA
TRINITY_DN6288_c3_g1_i1	YP_010803136.1	3648	27.641	568	345	17	2875	1334	37	592	5.34e-54	205	HrpA-like RNA helicase [Fadolivirus algeromassiliense].	Fadolivirus algeromassiliense	Viruses;Varidnaviria;Bamfordvirae;Nucleocytoviricota;Megaviricetes;Imitervirales;Mimiviridae;Klosneuvirinae;Fadolivirus.	Mimiviridae	dsDNA
TRINITY_DN674_c2_g4_i1	NP_848354.1	3023	23.063	568	315	14	2207	558	24	487	5.22e-31	131	global transactivator [Choristoneura fumiferana multiplenucleopolyhedrovirus].	Choristoneura fumiferana multiple nucleopolyhedrovirus	Viruses;Naldaviricetes;Lefavirales;Baculoviridae;Alphabaculovirus;Alphabaculoviruschofumiferanae.	Baculoviridae	dsDNA
TRINITY_DN3791_c0_g1_i42	YP_009665063.1	2993	43.11	566	293	6	972	2657	28	568	9.51e-134	417	cell division protein [Micromonas pusilla virus SP1].	Micromonas pusilla virus SP1	Viruses;Varidnaviria;Bamfordvirae;Nucleocytoviricota;Megaviricetes;Algavirales;Phycodnaviridae;Prasinovirus.	Phycodnaviridae	dsDNA
TRINITY_DN18027_c1_g1_i1	YP_009701904.1	3591	20.177	565	341	23	1497	3110	72	553	3.02e-05	52	ATPase [Paramecium bursaria Chlorella virus CVA-1].	Paramecium bursaria Chlorella virus CVA-1	Viruses;Varidnaviria;Bamfordvirae;Nucleocytoviricota;Megaviricetes;Algavirales;Phycodnaviridae;Chlorovirus;ParameciumbursariaChlorellavirusA1.	Phycodnaviridae	dsDNA
TRINITY_DN9331_c0_g1_i14	YP_010780181.1	3904	31.56	564	333	14	3317	1656	5	525	1.6e-73	266	hypothetical protein QJ856_gp1184 [Tupanvirus deep ocean].	Tupanvirus deep ocean	Viruses;Varidnaviria;Bamfordvirae;Nucleocytoviricota;Megaviricetes;Imitervirales;Mimiviridae;Megamimivirinae;Tupanvirus.	Mimiviridae	dsDNA
TRINITY_DN9331_c0_g1_i4	YP_008052581.1	3397	31.915	564	311	13	1337	3019	315	808	4.02e-90	266	DNA-directed RNA polymerase II subunit RPB1 [Phaeocystis globosavirus].	Phaeocystis globosa virus	Viruses;Varidnaviria;Bamfordvirae;Nucleocytoviricota;Megaviricetes;Algavirales;Phycodnaviridae;Prymnesiovirus.	Phycodnaviridae	dsDNA
TRINITY_DN2070_c1_g1_i2	YP_010780181.1	3344	31.56	564	333	14	2757	1096	5	525	4.64e-74	266	hypothetical protein QJ856_gp1184 [Tupanvirus deep ocean].	Tupanvirus deep ocean	Viruses;Varidnaviria;Bamfordvirae;Nucleocytoviricota;Megaviricetes;Imitervirales;Mimiviridae;Megamimivirinae;Tupanvirus.	Mimiviridae	dsDNA
TRINITY_DN2070_c1_g1_i6	YP_010780181.1	2844	31.56	564	333	14	2257	596	5	525	1.21e-74	265	hypothetical protein QJ856_gp1184 [Tupanvirus deep ocean].	Tupanvirus deep ocean	Viruses;Varidnaviria;Bamfordvirae;Nucleocytoviricota;Megaviricetes;Imitervirales;Mimiviridae;Megamimivirinae;Tupanvirus.	Mimiviridae	dsDNA
TRINITY_DN2070_c1_g1_i1	NP_612286.1	2237	27.66	564	299	21	308	1978	4	465	5.01e-51	188	putative RNA guanylytransferase [Infectious spleen and kidneynecrosis virus].	Infectious spleen and kidney necrosis virus	Viruses;Varidnaviria;Bamfordvirae;Nucleocytoviricota;Megaviricetes;Pimascovirales;Iridoviridae;Alphairidovirinae;Megalocytivirus.	Iridoviridae	dsDNA
TRINITY_DN5279_c0_g1_i14	YP_009329013.1	2036	25	564	365	20	1883	270	15	546	2.18e-29	128	serine-threonine kinase [Cedratvirus A11].	Cedratvirus A11	Viruses;Pithoviruses.	Pithoviruses	dsDNA
TRINITY_DN5279_c0_g1_i4	NP_570296.1	3047	21.314	563	378	14	2487	871	2	523	1.83e-33	140	SPV136 kelch-like protein [Swinepox virus].	Swinepox virus	Viruses;Varidnaviria;Bamfordvirae;Nucleocytoviricota;Pokkesviricetes;Chitovirales;Poxviridae;Chordopoxvirinae;Suipoxvirus.	Poxviridae	dsDNA
TRINITY_DN5279_c0_g1_i10	NP_570296.1	3852	26.512	562	366	10	3272	1623	6	532	7.63e-52	196	SPV136 kelch-like protein [Swinepox virus].	Swinepox virus	Viruses;Varidnaviria;Bamfordvirae;Nucleocytoviricota;Pokkesviricetes;Chitovirales;Poxviridae;Chordopoxvirinae;Suipoxvirus.	Poxviridae	dsDNA
TRINITY_DN23_c0_g1_i1	YP_010796961.1	2568	28.648	562	332	17	1917	346	110	640	6.58e-67	206	PolB [Mayetiola barley midge adintovirus].	Mayetiola barley midge adintovirus	Viruses;Varidnaviria;Bamfordvirae;Preplasmiviricota;Polintoviricetes;Orthopolintovirales;Adintoviridae;Alphadintovirus;Alphadintovirusmayetiola.	Adintoviridae	dsDNA
TRINITY_DN7092_c0_g1_i3	YP_009329013.1	1920	23.843	562	361	20	184	1779	18	542	8.45e-30	129	serine-threonine kinase [Cedratvirus A11].	Cedratvirus A11	Viruses;Pithoviruses.	Pithoviruses	dsDNA
TRINITY_DN3830_c0_g1_i5	YP_008004421.1	9816	24.421	561	298	27	4159	2711	90	602	0.000362	50.1	tryptophan repeat gene family [Choristoneura rosaceanaentomopoxvirus L].	Choristoneura rosaceana entomopoxvirus L	Viruses;Varidnaviria;Bamfordvirae;Nucleocytoviricota;Pokkesviricetes;Chitovirales;Poxviridae;Entomopoxvirinae;Betaentomopoxvirus;Choristoneurarosaceanaentomopoxvirus.	Poxviridae	dsDNA
TRINITY_DN54419_c1_g1_i1	YP_008004421.1	8775	24.421	561	298	27	4159	2711	90	602	0.000321	50.1	tryptophan repeat gene family [Choristoneura rosaceanaentomopoxvirus L].	Choristoneura rosaceana entomopoxvirus L	Viruses;Varidnaviria;Bamfordvirae;Nucleocytoviricota;Pokkesviricetes;Chitovirales;Poxviridae;Entomopoxvirinae;Betaentomopoxvirus;Choristoneurarosaceanaentomopoxvirus.	Poxviridae	dsDNA
TRINITY_DN1135_c1_g1_i6	YP_009177124.1	3195	24.821	560	320	15	2078	501	26	518	1.33e-24	114	ankyrin repeat family protein [Turkeypox virus].	Turkeypox virus	Viruses;Varidnaviria;Bamfordvirae;Nucleocytoviricota;Pokkesviricetes;Chitovirales;Poxviridae;Chordopoxvirinae;Avipoxvirus.	Poxviridae	dsDNA
TRINITY_DN1135_c1_g1_i9	NP_073525.1	2455	25.179	560	375	11	2154	523	15	546	9.17e-50	187	140R protein [Yaba-like disease virus].	Yaba-like disease virus	Viruses;Varidnaviria;Bamfordvirae;Nucleocytoviricota;Pokkesviricetes;Chitovirales;Poxviridae;Chordopoxvirinae;Yatapoxvirus;Tanapoxvirus.	Poxviridae	dsDNA
TRINITY_DN41699_c3_g1_i7	NP_073525.1	2402	25.179	560	375	11	2101	470	15	546	7.84e-50	187	140R protein [Yaba-like disease virus].	Yaba-like disease virus	Viruses;Varidnaviria;Bamfordvirae;Nucleocytoviricota;Pokkesviricetes;Chitovirales;Poxviridae;Chordopoxvirinae;Yatapoxvirus;Tanapoxvirus.	Poxviridae	dsDNA
TRINITY_DN1135_c1_g1_i2	NP_073525.1	2278	28.086	559	379	6	1977	313	4	543	1.46e-69	241	140R protein [Yaba-like disease virus].	Yaba-like disease virus	Viruses;Varidnaviria;Bamfordvirae;Nucleocytoviricota;Pokkesviricetes;Chitovirales;Poxviridae;Chordopoxvirinae;Yatapoxvirus;Tanapoxvirus.	Poxviridae	dsDNA
TRINITY_DN21093_c0_g1_i18	NP_073525.1	2117	23.792	559	393	8	228	1874	11	546	1.14e-50	189	140R protein [Yaba-like disease virus].	Yaba-like disease virus	Viruses;Varidnaviria;Bamfordvirae;Nucleocytoviricota;Pokkesviricetes;Chitovirales;Poxviridae;Chordopoxvirinae;Yatapoxvirus;Tanapoxvirus.	Poxviridae	dsDNA
TRINITY_DN295_c0_g1_i6	YP_010789745.1	7090	48.029	558	268	11	2950	4584	6	554	1.44e-146	474	heat shock 70 kDa protein-like protein [Moumouvirus australiensis].	Moumouvirus australiensis	Viruses;Varidnaviria;Bamfordvirae;Nucleocytoviricota;Megaviricetes;Imitervirales;Mimiviridae;Megamimivirinae;Moumouvirus;Moumouvirusaustraliense.	Mimiviridae	dsDNA
TRINITY_DN295_c0_g1_i1	YP_004061438.1	2831	51.167	557	256	7	1955	321	1	553	2.59e-176	528	hypothetical protein BpV1_008c [Bathycoccus sp. RCC1105 virusBpV1].	Bathycoccus sp. RCC1105 virus BpV1	Viruses;Varidnaviria;Bamfordvirae;Nucleocytoviricota;Megaviricetes;Algavirales;Phycodnaviridae;Prasinovirus;Bathycoccussp.RCC1105virusBpV.	Phycodnaviridae	dsDNA
TRINITY_DN295_c0_g1_i11	YP_009553211.1	8657	43.165	556	297	11	7347	5704	5	549	6.22e-108	389	polyprotein [Sogatella furcifera hepe-like virus].	Sogatella furcifera hepe-like virus	Viruses;Riboviria;Orthornavirae;Kitrinoviricota;Alsuviricetes;Hepelivirales;Hepeviridae.	Hepeviridae	ssRNA(+)
TRINITY_DN295_c0_g1_i23	YP_009553211.1	8367	43.165	556	297	11	7057	5414	5	549	5.75e-108	389	polyprotein [Sogatella furcifera hepe-like virus].	Sogatella furcifera hepe-like virus	Viruses;Riboviria;Orthornavirae;Kitrinoviricota;Alsuviricetes;Hepelivirales;Hepeviridae.	Hepeviridae	ssRNA(+)
TRINITY_DN295_c0_g1_i14	YP_009553211.1	8367	43.165	556	297	11	7057	5414	5	549	5.75e-108	389	polyprotein [Sogatella furcifera hepe-like virus].	Sogatella furcifera hepe-like virus	Viruses;Riboviria;Orthornavirae;Kitrinoviricota;Alsuviricetes;Hepelivirales;Hepeviridae.	Hepeviridae	ssRNA(+)
TRINITY_DN295_c0_g1_i2	YP_009483690.1	2520	25.719	556	295	22	2291	774	42	529	7.27e-36	147	Carboxylic ester hydrolase [Pandoravirus quercus].	Pandoravirus quercus	Viruses;Pandoravirus.	Pandoravirus	dsDNA
TRINITY_DN17474_c0_g1_i6	YP_009482408.1	3085	23.604	555	388	12	956	2545	74	617	3.57e-27	121	hAT family C-terminal dimerization region domain containing protein[Pandoravirus neocaledonia].	Pandoravirus neocaledonia	Viruses;Pandoravirus.	Pandoravirus	dsDNA
TRINITY_DN48589_c0_g1_i1	YP_009482408.1	2952	23.604	555	388	12	823	2412	74	617	2.97e-27	121	hAT family C-terminal dimerization region domain containing protein[Pandoravirus neocaledonia].	Pandoravirus neocaledonia	Viruses;Pandoravirus.	Pandoravirus	dsDNA
TRINITY_DN30212_c0_g1_i1	YP_009329013.1	2229	23.964	555	350	23	1880	321	18	535	3.78e-29	128	serine-threonine kinase [Cedratvirus A11].	Cedratvirus A11	Viruses;Pithoviruses.	Pithoviruses	dsDNA
TRINITY_DN295_c0_g2_i6	YP_010788465.1	4952	30.922	553	262	25	4517	2976	971	1442	0.000348	49.3	collagen-like protein [Megavirus baoshan].	Megavirus baoshan	Viruses;Varidnaviria;Bamfordvirae;Nucleocytoviricota;Megaviricetes;Imitervirales;Mimiviridae;Megamimivirinae;Megavirus;Megavirusbaoshanense.	Mimiviridae	dsDNA
TRINITY_DN42069_c0_g1_i1	YP_010780309.1	4347	25.859	553	335	17	3872	2274	1087	1584	3.82e-31	137	NcpA [Tupanvirus deep ocean].	Tupanvirus deep ocean	Viruses;Varidnaviria;Bamfordvirae;Nucleocytoviricota;Megaviricetes;Imitervirales;Mimiviridae;Megamimivirinae;Tupanvirus.	Mimiviridae	dsDNA
TRINITY_DN44056_c1_g1_i12	YP_010780309.1	4155	25.859	553	335	17	3872	2274	1087	1584	3.53e-31	137	NcpA [Tupanvirus deep ocean].	Tupanvirus deep ocean	Viruses;Varidnaviria;Bamfordvirae;Nucleocytoviricota;Megaviricetes;Imitervirales;Mimiviridae;Megamimivirinae;Tupanvirus.	Mimiviridae	dsDNA
TRINITY_DN1195_c0_g1_i19	YP_010803678.1	3209	41.772	553	286	9	1332	2966	1	525	4.24e-122	387	ABC transporter [Fadolivirus algeromassiliense].	Fadolivirus algeromassiliense	Viruses;Varidnaviria;Bamfordvirae;Nucleocytoviricota;Megaviricetes;Imitervirales;Mimiviridae;Klosneuvirinae;Fadolivirus.	Mimiviridae	dsDNA
TRINITY_DN26469_c1_g1_i1	YP_010804156.1	3106	39.964	553	286	9	460	2085	7	524	4.95e-121	390	DNA helicase ATP-dependent recq type [Fadolivirusalgeromassiliense].	Fadolivirus algeromassiliense	Viruses;Varidnaviria;Bamfordvirae;Nucleocytoviricota;Megaviricetes;Imitervirales;Mimiviridae;Klosneuvirinae;Fadolivirus.	Mimiviridae	dsDNA
TRINITY_DN39005_c0_g1_i6	YP_010803678.1	3043	41.772	553	286	9	1166	2800	1	525	1.01e-122	387	ABC transporter [Fadolivirus algeromassiliense].	Fadolivirus algeromassiliense	Viruses;Varidnaviria;Bamfordvirae;Nucleocytoviricota;Megaviricetes;Imitervirales;Mimiviridae;Klosneuvirinae;Fadolivirus.	Mimiviridae	dsDNA
TRINITY_DN13852_c0_g1_i4	YP_009701904.1	2423	26.221	553	356	12	310	1935	327	838	1.53e-52	181	ATPase [Paramecium bursaria Chlorella virus CVA-1].	Paramecium bursaria Chlorella virus CVA-1	Viruses;Varidnaviria;Bamfordvirae;Nucleocytoviricota;Megaviricetes;Algavirales;Phycodnaviridae;Chlorovirus;ParameciumbursariaChlorellavirusA1.	Phycodnaviridae	dsDNA
TRINITY_DN6670_c0_g1_i7	YP_010780309.1	4347	25.045	551	336	15	3872	2268	78	567	8.73e-28	126	NcpA [Tupanvirus deep ocean].	Tupanvirus deep ocean	Viruses;Varidnaviria;Bamfordvirae;Nucleocytoviricota;Megaviricetes;Imitervirales;Mimiviridae;Megamimivirinae;Tupanvirus.	Mimiviridae	dsDNA
TRINITY_DN11922_c1_g7_i1	YP_010780309.1	4155	25.045	551	336	15	3872	2268	78	567	8.1e-28	126	NcpA [Tupanvirus deep ocean].	Tupanvirus deep ocean	Viruses;Varidnaviria;Bamfordvirae;Nucleocytoviricota;Megaviricetes;Imitervirales;Mimiviridae;Megamimivirinae;Tupanvirus.	Mimiviridae	dsDNA
TRINITY_DN4998_c0_g2_i9	YP_010779185.1	2485	32.123	551	326	21	2274	739	84	625	3.45e-41	165	repeat protein [Moumouvirus goulette].	Moumouvirus goulette	Viruses;Varidnaviria;Bamfordvirae;Nucleocytoviricota;Megaviricetes;Imitervirales;Mimiviridae;Megamimivirinae;Moumouvirus;Moumouvirusgoulettemassiliense.	Mimiviridae	dsDNA
TRINITY_DN2070_c1_g1_i3	YP_010796961.1	3629	30.545	550	309	14	3460	1937	95	613	1.39e-135	209	PolB [Mayetiola barley midge adintovirus].	Mayetiola barley midge adintovirus	Viruses;Varidnaviria;Bamfordvirae;Preplasmiviricota;Polintoviricetes;Orthopolintovirales;Adintoviridae;Alphadintovirus;Alphadintovirusmayetiola.	Adintoviridae	dsDNA
TRINITY_DN1333_c0_g1_i2	YP_010796961.1	3602	30.364	550	310	14	3433	1910	95	613	1.12e-133	206	PolB [Mayetiola barley midge adintovirus].	Mayetiola barley midge adintovirus	Viruses;Varidnaviria;Bamfordvirae;Preplasmiviricota;Polintoviricetes;Orthopolintovirales;Adintoviridae;Alphadintovirus;Alphadintovirusmayetiola.	Adintoviridae	dsDNA
TRINITY_DN11565_c0_g1_i25	YP_009665827.1	2834	31.876	549	329	13	963	2525	54	585	1.46e-75	262	hypothetical protein CsmBV13.10 [Bracoviriform facetosae].	Bracoviriform facetosae	Viruses;Polydnaviriformidae;Bracoviriform.	Polydnaviriformidae	dsDNA
TRINITY_DN11565_c0_g1_i5	YP_009665827.1	2797	31.876	549	329	13	926	2488	54	585	8.94e-76	262	hypothetical protein CsmBV13.10 [Bracoviriform facetosae].	Bracoviriform facetosae	Viruses;Polydnaviriformidae;Bracoviriform.	Polydnaviriformidae	dsDNA
TRINITY_DN138075_c0_g1_i6	YP_009665827.1	2796	31.876	549	329	13	925	2487	54	585	8.94e-76	262	hypothetical protein CsmBV13.10 [Bracoviriform facetosae].	Bracoviriform facetosae	Viruses;Polydnaviriformidae;Bracoviriform.	Polydnaviriformidae	dsDNA
TRINITY_DN3427_c0_g1_i31	YP_010780309.1	1894	23.862	549	339	15	227	1831	1008	1491	1.12e-18	94.4	NcpA [Tupanvirus deep ocean].	Tupanvirus deep ocean	Viruses;Varidnaviria;Bamfordvirae;Nucleocytoviricota;Megaviricetes;Imitervirales;Mimiviridae;Megamimivirinae;Tupanvirus.	Mimiviridae	dsDNA
TRINITY_DN712_c0_g1_i8	YP_009173627.1	4222	29.197	548	340	15	3904	2285	9	516	8.28e-53	201	Hsp70 protein [Chrysochromulina ericina virus].	Chrysochromulina ericina virus	Viruses;Varidnaviria;Bamfordvirae;Nucleocytoviricota;Megaviricetes;Algavirales;Phycodnaviridae.	Phycodnaviridae	dsDNA
TRINITY_DN1438_c1_g1_i4	YP_009173627.1	2923	29.197	548	340	15	2605	986	9	516	2.89e-53	201	Hsp70 protein [Chrysochromulina ericina virus].	Chrysochromulina ericina virus	Viruses;Varidnaviria;Bamfordvirae;Nucleocytoviricota;Megaviricetes;Algavirales;Phycodnaviridae.	Phycodnaviridae	dsDNA
TRINITY_DN712_c0_g1_i7	YP_009173627.1	2764	29.197	548	340	15	2446	827	9	516	2.08e-53	201	Hsp70 protein [Chrysochromulina ericina virus].	Chrysochromulina ericina virus	Viruses;Varidnaviria;Bamfordvirae;Nucleocytoviricota;Megaviricetes;Algavirales;Phycodnaviridae.	Phycodnaviridae	dsDNA
TRINITY_DN712_c0_g1_i2	YP_009417301.1	3010	35.649	547	296	18	2527	965	107	623	4.26e-74	264	RdRp [Australian Anopheles totivirus].	Australian Anopheles totivirus	Viruses;Riboviria;Orthornavirae;Duplornaviricota;Chrymotiviricetes;Ghabrivirales;Totiviridae.	Totiviridae	dsRNA
TRINITY_DN6389_c1_g1_i32	NP_073525.1	2575	26.19	546	375	7	2282	675	14	541	2.03e-56	207	140R protein [Yaba-like disease virus].	Yaba-like disease virus	Viruses;Varidnaviria;Bamfordvirae;Nucleocytoviricota;Pokkesviricetes;Chitovirales;Poxviridae;Chordopoxvirinae;Yatapoxvirus;Tanapoxvirus.	Poxviridae	dsDNA
TRINITY_DN6389_c1_g1_i15	NP_570296.1	2483	27.289	546	354	12	1913	318	7	523	1.52e-60	218	SPV136 kelch-like protein [Swinepox virus].	Swinepox virus	Viruses;Varidnaviria;Bamfordvirae;Nucleocytoviricota;Pokkesviricetes;Chitovirales;Poxviridae;Chordopoxvirinae;Suipoxvirus.	Poxviridae	dsDNA
TRINITY_DN6977_c0_g1_i16	YP_009001225.1	2271	28.571	546	323	12	404	1999	72	564	1.45e-51	193	ABC transporter [Pithovirus sibericum].	Pithovirus sibericum	Viruses;Pithoviruses;Pithovirus.	Pithovirus	dsDNA
TRINITY_DN30744_c0_g1_i27	YP_010804172.1	4374	42.647	544	278	9	2952	1330	44	556	4.09e-127	409	DNA topoisomerase I [Fadolivirus algeromassiliense].	Fadolivirus algeromassiliense	Viruses;Varidnaviria;Bamfordvirae;Nucleocytoviricota;Megaviricetes;Imitervirales;Mimiviridae;Klosneuvirinae;Fadolivirus.	Mimiviridae	dsDNA
TRINITY_DN30744_c0_g1_i14	YP_010804172.1	3874	42.647	544	278	9	2953	1331	44	556	3.31e-128	409	DNA topoisomerase I [Fadolivirus algeromassiliense].	Fadolivirus algeromassiliense	Viruses;Varidnaviria;Bamfordvirae;Nucleocytoviricota;Megaviricetes;Imitervirales;Mimiviridae;Klosneuvirinae;Fadolivirus.	Mimiviridae	dsDNA
TRINITY_DN30744_c0_g1_i17	NP_570296.1	3390	26.838	544	352	9	3221	1623	24	532	1.11e-50	192	SPV136 kelch-like protein [Swinepox virus].	Swinepox virus	Viruses;Varidnaviria;Bamfordvirae;Nucleocytoviricota;Pokkesviricetes;Chitovirales;Poxviridae;Chordopoxvirinae;Suipoxvirus.	Poxviridae	dsDNA
TRINITY_DN30744_c0_g1_i31	YP_010804172.1	3241	42.647	544	278	9	2952	1330	44	556	1.01e-129	409	DNA topoisomerase I [Fadolivirus algeromassiliense].	Fadolivirus algeromassiliense	Viruses;Varidnaviria;Bamfordvirae;Nucleocytoviricota;Megaviricetes;Imitervirales;Mimiviridae;Klosneuvirinae;Fadolivirus.	Mimiviridae	dsDNA
TRINITY_DN30744_c0_g1_i7	YP_007676312.1	5484	47.33	543	262	9	2200	3789	39	570	1.32e-143	462	heat shock protein 70 [Micromonas pusilla virus 12T].	Micromonas pusilla virus 12T	Viruses;Varidnaviria;Bamfordvirae;Nucleocytoviricota;Megaviricetes;Algavirales;Phycodnaviridae;Prasinovirus.	Phycodnaviridae	dsDNA
TRINITY_DN21236_c0_g1_i47	YP_009177124.1	8911	30.258	542	325	11	7776	6175	26	522	1.41e-53	207	ankyrin repeat family protein [Turkeypox virus].	Turkeypox virus	Viruses;Varidnaviria;Bamfordvirae;Nucleocytoviricota;Pokkesviricetes;Chitovirales;Poxviridae;Chordopoxvirinae;Avipoxvirus.	Poxviridae	dsDNA
TRINITY_DN21236_c0_g1_i22	YP_009177124.1	8911	30.258	542	327	11	8373	6769	25	522	9.29e-47	186	ankyrin repeat family protein [Turkeypox virus].	Turkeypox virus	Viruses;Varidnaviria;Bamfordvirae;Nucleocytoviricota;Pokkesviricetes;Chitovirales;Poxviridae;Chordopoxvirinae;Avipoxvirus.	Poxviridae	dsDNA
TRINITY_DN21236_c0_g1_i35	YP_009177124.1	8797	30.258	542	325	11	7662	6061	26	522	1.38e-53	207	ankyrin repeat family protein [Turkeypox virus].	Turkeypox virus	Viruses;Varidnaviria;Bamfordvirae;Nucleocytoviricota;Pokkesviricetes;Chitovirales;Poxviridae;Chordopoxvirinae;Avipoxvirus.	Poxviridae	dsDNA
TRINITY_DN21236_c0_g1_i24	YP_009177124.1	8797	30.258	542	327	11	8259	6655	25	522	9.14e-47	186	ankyrin repeat family protein [Turkeypox virus].	Turkeypox virus	Viruses;Varidnaviria;Bamfordvirae;Nucleocytoviricota;Pokkesviricetes;Chitovirales;Poxviridae;Chordopoxvirinae;Avipoxvirus.	Poxviridae	dsDNA
TRINITY_DN21236_c0_g1_i10	YP_009177124.1	8179	30.258	542	325	11	7044	5443	26	522	1.26e-53	207	ankyrin repeat family protein [Turkeypox virus].	Turkeypox virus	Viruses;Varidnaviria;Bamfordvirae;Nucleocytoviricota;Pokkesviricetes;Chitovirales;Poxviridae;Chordopoxvirinae;Avipoxvirus.	Poxviridae	dsDNA
TRINITY_DN30744_c0_g1_i3	YP_009177124.1	8179	30.258	542	327	11	7641	6037	25	522	8.32e-47	186	ankyrin repeat family protein [Turkeypox virus].	Turkeypox virus	Viruses;Varidnaviria;Bamfordvirae;Nucleocytoviricota;Pokkesviricetes;Chitovirales;Poxviridae;Chordopoxvirinae;Avipoxvirus.	Poxviridae	dsDNA
TRINITY_DN7673_c0_g1_i4	YP_009177124.1	8065	30.258	542	325	11	6930	5329	26	522	1.24e-53	207	ankyrin repeat family protein [Turkeypox virus].	Turkeypox virus	Viruses;Varidnaviria;Bamfordvirae;Nucleocytoviricota;Pokkesviricetes;Chitovirales;Poxviridae;Chordopoxvirinae;Avipoxvirus.	Poxviridae	dsDNA
TRINITY_DN44056_c1_g1_i5	YP_009177124.1	8065	30.258	542	327	11	7527	5923	25	522	8.17e-47	186	ankyrin repeat family protein [Turkeypox virus].	Turkeypox virus	Viruses;Varidnaviria;Bamfordvirae;Nucleocytoviricota;Pokkesviricetes;Chitovirales;Poxviridae;Chordopoxvirinae;Avipoxvirus.	Poxviridae	dsDNA
TRINITY_DN5279_c0_g1_i5	YP_009177124.1	6697	30.258	542	325	11	5562	3961	26	522	9.59e-54	207	ankyrin repeat family protein [Turkeypox virus].	Turkeypox virus	Viruses;Varidnaviria;Bamfordvirae;Nucleocytoviricota;Pokkesviricetes;Chitovirales;Poxviridae;Chordopoxvirinae;Avipoxvirus.	Poxviridae	dsDNA
TRINITY_DN13027_c1_g1_i3	YP_009177124.1	6697	30.258	542	327	11	6159	4555	25	522	6.35e-47	186	ankyrin repeat family protein [Turkeypox virus].	Turkeypox virus	Viruses;Varidnaviria;Bamfordvirae;Nucleocytoviricota;Pokkesviricetes;Chitovirales;Poxviridae;Chordopoxvirinae;Avipoxvirus.	Poxviridae	dsDNA
TRINITY_DN101638_c0_g1_i20	YP_009177124.1	6062	30.258	542	325	11	4927	3326	26	522	8.3e-54	207	ankyrin repeat family protein [Turkeypox virus].	Turkeypox virus	Viruses;Varidnaviria;Bamfordvirae;Nucleocytoviricota;Pokkesviricetes;Chitovirales;Poxviridae;Chordopoxvirinae;Avipoxvirus.	Poxviridae	dsDNA
TRINITY_DN101638_c0_g1_i15	YP_009177124.1	6062	30.258	542	327	11	5524	3920	25	522	5.51e-47	186	ankyrin repeat family protein [Turkeypox virus].	Turkeypox virus	Viruses;Varidnaviria;Bamfordvirae;Nucleocytoviricota;Pokkesviricetes;Chitovirales;Poxviridae;Chordopoxvirinae;Avipoxvirus.	Poxviridae	dsDNA
TRINITY_DN54161_c0_g1_i1	YP_009325865.1	3299	41.144	542	256	13	3121	1496	284	762	7.63e-112	371	ATPase [Only Syngen Nebraska virus 5].	Only Syngen Nebraska virus 5	Viruses;Varidnaviria;Bamfordvirae;Nucleocytoviricota;Megaviricetes;Algavirales;Phycodnaviridae;Chlorovirus.	Phycodnaviridae	dsDNA
TRINITY_DN54161_c0_g1_i2	YP_001129438.1	2410	28.413	542	334	18	636	2195	800	1309	9.7e-43	171	BNRF1 [Human herpesvirus 4 type 2].	Human herpesvirus 4 type 2	Viruses;Duplodnaviria;Heunggongvirae;Peploviricota;Herviviricetes;Herpesvirales;Orthoherpesviridae;Gammaherpesvirinae;Lymphocryptovirus;Lymphocryptovirushumangamma4.	Orthoherpesviridae	dsDNA
TRINITY_DN84410_c0_g1_i19	YP_010780181.1	1856	28.229	542	343	17	157	1752	2	507	2.43e-51	193	hypothetical protein QJ856_gp1184 [Tupanvirus deep ocean].	Tupanvirus deep ocean	Viruses;Varidnaviria;Bamfordvirae;Nucleocytoviricota;Megaviricetes;Imitervirales;Mimiviridae;Megamimivirinae;Tupanvirus.	Mimiviridae	dsDNA
TRINITY_DN84410_c0_g1_i8	YP_009177124.1	6011	29.02	541	335	11	5329	3731	23	522	5.61e-43	174	ankyrin repeat family protein [Turkeypox virus].	Turkeypox virus	Viruses;Varidnaviria;Bamfordvirae;Nucleocytoviricota;Pokkesviricetes;Chitovirales;Poxviridae;Chordopoxvirinae;Avipoxvirus.	Poxviridae	dsDNA
TRINITY_DN166286_c0_g1_i3	YP_010782357.1	1935	28.571	539	248	37	31	1455	55	520	2.3e-09	63.9	hypothetical protein QJ857_gp0350 [Tupanvirus soda lake].	Tupanvirus soda lake	Viruses;Varidnaviria;Bamfordvirae;Nucleocytoviricota;Megaviricetes;Imitervirales;Mimiviridae;Megamimivirinae;Tupanvirus.	Mimiviridae	dsDNA
TRINITY_DN166286_c0_g1_i1	NP_073525.1	1757	24.49	539	327	7	1523	87	12	530	5.31e-47	176	140R protein [Yaba-like disease virus].	Yaba-like disease virus	Viruses;Varidnaviria;Bamfordvirae;Nucleocytoviricota;Pokkesviricetes;Chitovirales;Poxviridae;Chordopoxvirinae;Yatapoxvirus;Tanapoxvirus.	Poxviridae	dsDNA
TRINITY_DN166286_c0_g1_i2	YP_008004421.1	9816	25.651	538	284	27	4669	3203	132	602	0.000308	50.1	tryptophan repeat gene family [Choristoneura rosaceanaentomopoxvirus L].	Choristoneura rosaceana entomopoxvirus L	Viruses;Varidnaviria;Bamfordvirae;Nucleocytoviricota;Pokkesviricetes;Chitovirales;Poxviridae;Entomopoxvirinae;Betaentomopoxvirus;Choristoneurarosaceanaentomopoxvirus.	Poxviridae	dsDNA
TRINITY_DN6621_c0_g3_i2	YP_008004421.1	8775	25.651	538	284	27	4669	3203	132	602	0.000273	50.1	tryptophan repeat gene family [Choristoneura rosaceanaentomopoxvirus L].	Choristoneura rosaceana entomopoxvirus L	Viruses;Varidnaviria;Bamfordvirae;Nucleocytoviricota;Pokkesviricetes;Chitovirales;Poxviridae;Entomopoxvirinae;Betaentomopoxvirus;Choristoneurarosaceanaentomopoxvirus.	Poxviridae	dsDNA
TRINITY_DN146955_c0_g1_i1	YP_003987440.1	4858	29.182	538	294	23	4590	3100	5	496	9.96e-38	154	probable cholinesterase [Acanthamoeba polyphaga mimivirus].	Acanthamoeba polyphaga mimivirus	Viruses;Varidnaviria;Bamfordvirae;Nucleocytoviricota;Megaviricetes;Imitervirales;Mimiviridae;Megamimivirinae;Mimivirus;Mimivirusbradfordmassiliense.	Mimiviridae	dsDNA
TRINITY_DN1802_c0_g1_i7	YP_010796961.1	2101	25.465	538	310	18	75	1520	109	611	4.78e-32	137	PolB [Mayetiola barley midge adintovirus].	Mayetiola barley midge adintovirus	Viruses;Varidnaviria;Bamfordvirae;Preplasmiviricota;Polintoviricetes;Orthopolintovirales;Adintoviridae;Alphadintovirus;Alphadintovirusmayetiola.	Adintoviridae	dsDNA
TRINITY_DN7027_c0_g1_i2	YP_009173631.1	5367	38.175	537	289	15	5148	3598	1	514	9.15e-93	317	asparagine synthetase B [Chrysochromulina ericina virus].	Chrysochromulina ericina virus	Viruses;Varidnaviria;Bamfordvirae;Nucleocytoviricota;Megaviricetes;Algavirales;Phycodnaviridae.	Phycodnaviridae	dsDNA
TRINITY_DN1288_c0_g1_i25	YP_010778819.1	2991	27.002	537	336	16	217	1719	41	557	8.76e-51	194	dynamin-like protein [Bodo saltans virus].	Bodo saltans virus	Viruses;Varidnaviria;Bamfordvirae;Nucleocytoviricota;Megaviricetes;Imitervirales;Mimiviridae;Klosneuvirinae;Theiavirus;Theiavirussalishense.	Mimiviridae	dsDNA
TRINITY_DN1288_c0_g1_i10	YP_010780309.1	1765	23.836	537	329	21	227	1732	3	494	1.14e-07	58.9	NcpA [Tupanvirus deep ocean].	Tupanvirus deep ocean	Viruses;Varidnaviria;Bamfordvirae;Nucleocytoviricota;Megaviricetes;Imitervirales;Mimiviridae;Megamimivirinae;Tupanvirus.	Mimiviridae	dsDNA
TRINITY_DN1288_c0_g1_i19	YP_009325851.1	3696	51.028	535	249	2	3180	1582	9	532	0	552	CTP synthetase [Only Syngen Nebraska virus 5].	Only Syngen Nebraska virus 5	Viruses;Varidnaviria;Bamfordvirae;Nucleocytoviricota;Megaviricetes;Algavirales;Phycodnaviridae;Chlorovirus.	Phycodnaviridae	dsDNA
TRINITY_DN1288_c0_g1_i14	YP_010778125.1	2355	31.963	535	320	13	197	1705	48	570	6.46e-56	207	putative ATP-dependent RNA helicase [Bodo saltans virus].	Bodo saltans virus	Viruses;Varidnaviria;Bamfordvirae;Nucleocytoviricota;Megaviricetes;Imitervirales;Mimiviridae;Klosneuvirinae;Theiavirus;Theiavirussalishense.	Mimiviridae	dsDNA
TRINITY_DN1288_c0_g1_i12	YP_009665827.1	1943	31.776	535	329	12	424	1941	54	581	1.74e-75	255	hypothetical protein CsmBV13.10 [Bracoviriform facetosae].	Bracoviriform facetosae	Viruses;Polydnaviriformidae;Bracoviriform.	Polydnaviriformidae	dsDNA
TRINITY_DN1288_c0_g1_i30	YP_009417301.1	5405	33.895	534	309	16	2963	4486	104	619	7.59e-72	261	RdRp [Australian Anopheles totivirus].	Australian Anopheles totivirus	Viruses;Riboviria;Orthornavirae;Duplornaviricota;Chrymotiviricetes;Ghabrivirales;Totiviridae.	Totiviridae	dsRNA
TRINITY_DN34726_c0_g1_i23	YP_009046239.1	3665	28.839	534	236	21	3410	1884	14	428	1.15e-31	135	ankyrin repeat protein [Penguinpox virus].	Penguinpox virus	Viruses;Varidnaviria;Bamfordvirae;Nucleocytoviricota;Pokkesviricetes;Chitovirales;Poxviridae;Chordopoxvirinae;Avipoxvirus.	Poxviridae	dsDNA
TRINITY_DN101638_c0_g1_i11	YP_009046239.1	3170	28.839	534	236	21	2606	1080	14	428	1.14e-31	135	ankyrin repeat protein [Penguinpox virus].	Penguinpox virus	Viruses;Varidnaviria;Bamfordvirae;Nucleocytoviricota;Pokkesviricetes;Chitovirales;Poxviridae;Chordopoxvirinae;Avipoxvirus.	Poxviridae	dsDNA
TRINITY_DN15201_c1_g1_i1	YP_010781689.1	3084	48.689	534	239	6	1319	2848	2	524	3.69e-175	524	prolyl-tRNA synthetase [Tupanvirus soda lake].	Tupanvirus soda lake	Viruses;Varidnaviria;Bamfordvirae;Nucleocytoviricota;Megaviricetes;Imitervirales;Mimiviridae;Megamimivirinae;Tupanvirus.	Mimiviridae	dsDNA
TRINITY_DN2543_c1_g1_i3	NP_570296.1	1844	21.536	534	355	13	1760	228	31	523	7.88e-33	136	SPV136 kelch-like protein [Swinepox virus].	Swinepox virus	Viruses;Varidnaviria;Bamfordvirae;Nucleocytoviricota;Pokkesviricetes;Chitovirales;Poxviridae;Chordopoxvirinae;Suipoxvirus.	Poxviridae	dsDNA
TRINITY_DN3031_c0_g1_i6	YP_009173045.1	4167	32.645	533	309	16	1987	467	1	509	4.81e-71	252	hypothetical protein AP054_gp033 [Ostreococcus lucimarinus virus7].	Ostreococcus lucimarinus virus 7	Viruses;Varidnaviria;Bamfordvirae;Nucleocytoviricota;Megaviricetes;Algavirales;Phycodnaviridae;Prasinovirus.	Phycodnaviridae	dsDNA
TRINITY_DN138075_c0_g1_i11	YP_010804160.1	3942	23.265	533	318	18	766	2184	61	562	5e-20	99.8	long-chain fatty acid CoA synthetase [Fadolivirusalgeromassiliense].	Fadolivirus algeromassiliense	Viruses;Varidnaviria;Bamfordvirae;Nucleocytoviricota;Megaviricetes;Imitervirales;Mimiviridae;Klosneuvirinae;Fadolivirus.	Mimiviridae	dsDNA
TRINITY_DN138075_c0_g1_i8	YP_009173045.1	3763	32.645	533	309	16	1987	467	1	509	3.22e-71	252	hypothetical protein AP054_gp033 [Ostreococcus lucimarinus virus7].	Ostreococcus lucimarinus virus 7	Viruses;Varidnaviria;Bamfordvirae;Nucleocytoviricota;Megaviricetes;Algavirales;Phycodnaviridae;Prasinovirus.	Phycodnaviridae	dsDNA
TRINITY_DN138075_c0_g1_i3	YP_009173045.1	3732	32.645	533	309	16	1987	467	1	509	3.07e-71	252	hypothetical protein AP054_gp033 [Ostreococcus lucimarinus virus7].	Ostreococcus lucimarinus virus 7	Viruses;Varidnaviria;Bamfordvirae;Nucleocytoviricota;Megaviricetes;Algavirales;Phycodnaviridae;Prasinovirus.	Phycodnaviridae	dsDNA
TRINITY_DN138075_c0_g1_i1	YP_010779185.1	3351	24.953	533	335	15	591	2114	60	552	8.17e-26	118	repeat protein [Moumouvirus goulette].	Moumouvirus goulette	Viruses;Varidnaviria;Bamfordvirae;Nucleocytoviricota;Megaviricetes;Imitervirales;Mimiviridae;Megamimivirinae;Moumouvirus;Moumouvirusgoulettemassiliense.	Mimiviridae	dsDNA
TRINITY_DN53476_c0_g1_i1	NP_570746.1	4422	25.235	531	340	19	3899	2373	67	562	1.75e-34	145	complement binding protein [Macacine gammaherpesvirus 5].	Macacine gammaherpesvirus 5	Viruses;Duplodnaviria;Heunggongvirae;Peploviricota;Herviviricetes;Herpesvirales;Orthoherpesviridae;Gammaherpesvirinae;Rhadinovirus;Rhadinovirusmacacinegamma5.	Orthoherpesviridae	dsDNA
TRINITY_DN579_c0_g1_i14	NP_570746.1	4354	25.235	531	340	19	3831	2305	67	562	1.71e-34	145	complement binding protein [Macacine gammaherpesvirus 5].	Macacine gammaherpesvirus 5	Viruses;Duplodnaviria;Heunggongvirae;Peploviricota;Herviviricetes;Herpesvirales;Orthoherpesviridae;Gammaherpesvirinae;Rhadinovirus;Rhadinovirusmacacinegamma5.	Orthoherpesviridae	dsDNA
TRINITY_DN3830_c0_g1_i1	YP_009481512.1	2404	25.424	531	310	22	454	1920	25	511	1.21e-33	140	Carboxylic ester hydrolase [Pandoravirus macleodensis].	Pandoravirus macleodensis	Viruses;Pandoravirus.	Pandoravirus	dsDNA
TRINITY_DN5108_c0_g2_i2	YP_009664930.1	6382	24.906	530	288	18	4440	5969	22	461	5.56e-31	132	DNA helicase [Micromonas pusilla virus SP1].	Micromonas pusilla virus SP1	Viruses;Varidnaviria;Bamfordvirae;Nucleocytoviricota;Megaviricetes;Algavirales;Phycodnaviridae;Prasinovirus.	Phycodnaviridae	dsDNA
TRINITY_DN5108_c0_g2_i4	YP_009664930.1	6050	24.906	530	288	18	4108	5637	22	461	5.21e-31	132	DNA helicase [Micromonas pusilla virus SP1].	Micromonas pusilla virus SP1	Viruses;Varidnaviria;Bamfordvirae;Nucleocytoviricota;Megaviricetes;Algavirales;Phycodnaviridae;Prasinovirus.	Phycodnaviridae	dsDNA
TRINITY_DN5108_c0_g2_i3	YP_009664930.1	6048	24.906	530	288	18	4106	5635	22	461	5.21e-31	132	DNA helicase [Micromonas pusilla virus SP1].	Micromonas pusilla virus SP1	Viruses;Varidnaviria;Bamfordvirae;Nucleocytoviricota;Megaviricetes;Algavirales;Phycodnaviridae;Prasinovirus.	Phycodnaviridae	dsDNA
TRINITY_DN5108_c0_g2_i1	YP_009664930.1	6043	24.906	530	288	18	4101	5630	22	461	5.21e-31	132	DNA helicase [Micromonas pusilla virus SP1].	Micromonas pusilla virus SP1	Viruses;Varidnaviria;Bamfordvirae;Nucleocytoviricota;Megaviricetes;Algavirales;Phycodnaviridae;Prasinovirus.	Phycodnaviridae	dsDNA
TRINITY_DN26265_c0_g1_i2	YP_009664930.1	5661	24.906	530	288	18	3719	5248	22	461	4.8e-31	132	DNA helicase [Micromonas pusilla virus SP1].	Micromonas pusilla virus SP1	Viruses;Varidnaviria;Bamfordvirae;Nucleocytoviricota;Megaviricetes;Algavirales;Phycodnaviridae;Prasinovirus.	Phycodnaviridae	dsDNA
TRINITY_DN9132_c0_g1_i6	YP_010778819.1	3354	29.811	530	314	14	316	1776	40	554	6.85e-54	203	dynamin-like protein [Bodo saltans virus].	Bodo saltans virus	Viruses;Varidnaviria;Bamfordvirae;Nucleocytoviricota;Megaviricetes;Imitervirales;Mimiviridae;Klosneuvirinae;Theiavirus;Theiavirussalishense.	Mimiviridae	dsDNA
TRINITY_DN963_c0_g3_i2	YP_010778819.1	3273	29.811	530	314	14	316	1776	40	554	4.31e-54	204	dynamin-like protein [Bodo saltans virus].	Bodo saltans virus	Viruses;Varidnaviria;Bamfordvirae;Nucleocytoviricota;Megaviricetes;Imitervirales;Mimiviridae;Klosneuvirinae;Theiavirus;Theiavirussalishense.	Mimiviridae	dsDNA
TRINITY_DN42030_c0_g1_i1	YP_010778819.1	3245	29.811	530	314	14	316	1776	40	554	5.95e-54	203	dynamin-like protein [Bodo saltans virus].	Bodo saltans virus	Viruses;Varidnaviria;Bamfordvirae;Nucleocytoviricota;Megaviricetes;Imitervirales;Mimiviridae;Klosneuvirinae;Theiavirus;Theiavirussalishense.	Mimiviridae	dsDNA
TRINITY_DN9004_c0_g2_i4	YP_010778819.1	3170	29.811	530	314	14	316	1776	40	554	5.81e-54	203	dynamin-like protein [Bodo saltans virus].	Bodo saltans virus	Viruses;Varidnaviria;Bamfordvirae;Nucleocytoviricota;Megaviricetes;Imitervirales;Mimiviridae;Klosneuvirinae;Theiavirus;Theiavirussalishense.	Mimiviridae	dsDNA
TRINITY_DN42030_c0_g1_i2	YP_010778819.1	3156	29.811	530	314	14	316	1776	40	554	5.36e-54	203	dynamin-like protein [Bodo saltans virus].	Bodo saltans virus	Viruses;Varidnaviria;Bamfordvirae;Nucleocytoviricota;Megaviricetes;Imitervirales;Mimiviridae;Klosneuvirinae;Theiavirus;Theiavirussalishense.	Mimiviridae	dsDNA
TRINITY_DN963_c0_g3_i1	YP_009664930.1	2427	24.906	530	288	18	485	2014	22	461	1.06e-31	133	DNA helicase [Micromonas pusilla virus SP1].	Micromonas pusilla virus SP1	Viruses;Varidnaviria;Bamfordvirae;Nucleocytoviricota;Megaviricetes;Algavirales;Phycodnaviridae;Prasinovirus.	Phycodnaviridae	dsDNA
TRINITY_DN6751_c4_g4_i1	YP_009329403.1	2749	31.191	529	335	10	568	2148	30	531	3.16e-68	241	ABC transporter, partial [Cedratvirus A11].	Cedratvirus A11	Viruses;Pithoviruses.	Pithoviruses	dsDNA
TRINITY_DN5573_c0_g1_i12	NP_073525.1	2269	25.331	529	368	6	2063	507	23	534	4.36e-46	176	140R protein [Yaba-like disease virus].	Yaba-like disease virus	Viruses;Varidnaviria;Bamfordvirae;Nucleocytoviricota;Pokkesviricetes;Chitovirales;Poxviridae;Chordopoxvirinae;Yatapoxvirus;Tanapoxvirus.	Poxviridae	dsDNA
TRINITY_DN6212_c2_g1_i19	NP_570746.1	4422	24.858	527	311	22	4199	2727	85	562	1.51e-30	133	complement binding protein [Macacine gammaherpesvirus 5].	Macacine gammaherpesvirus 5	Viruses;Duplodnaviria;Heunggongvirae;Peploviricota;Herviviricetes;Herpesvirales;Orthoherpesviridae;Gammaherpesvirinae;Rhadinovirus;Rhadinovirusmacacinegamma5.	Orthoherpesviridae	dsDNA
TRINITY_DN6212_c2_g1_i9	NP_570746.1	4354	24.858	527	311	22	4131	2659	85	562	1.48e-30	133	complement binding protein [Macacine gammaherpesvirus 5].	Macacine gammaherpesvirus 5	Viruses;Duplodnaviria;Heunggongvirae;Peploviricota;Herviviricetes;Herpesvirales;Orthoherpesviridae;Gammaherpesvirinae;Rhadinovirus;Rhadinovirusmacacinegamma5.	Orthoherpesviridae	dsDNA
TRINITY_DN15338_c0_g1_i2	YP_009173627.1	4185	29.222	527	326	14	3841	2285	29	516	3.87e-51	196	Hsp70 protein [Chrysochromulina ericina virus].	Chrysochromulina ericina virus	Viruses;Varidnaviria;Bamfordvirae;Nucleocytoviricota;Megaviricetes;Algavirales;Phycodnaviridae.	Phycodnaviridae	dsDNA
TRINITY_DN26265_c0_g1_i4	NP_073525.1	1977	25.996	527	346	11	1676	144	15	513	6.79e-50	186	140R protein [Yaba-like disease virus].	Yaba-like disease virus	Viruses;Varidnaviria;Bamfordvirae;Nucleocytoviricota;Pokkesviricetes;Chitovirales;Poxviridae;Chordopoxvirinae;Yatapoxvirus;Tanapoxvirus.	Poxviridae	dsDNA
TRINITY_DN72627_c0_g1_i12	YP_010779185.1	2485	26.857	525	306	17	2388	1015	191	704	8.07e-24	111	repeat protein [Moumouvirus goulette].	Moumouvirus goulette	Viruses;Varidnaviria;Bamfordvirae;Nucleocytoviricota;Megaviricetes;Imitervirales;Mimiviridae;Megamimivirinae;Moumouvirus;Moumouvirusgoulettemassiliense.	Mimiviridae	dsDNA
TRINITY_DN38154_c0_g1_i5	YP_009001225.1	2280	29.905	525	325	15	305	1834	68	564	1.3e-55	204	ABC transporter [Pithovirus sibericum].	Pithovirus sibericum	Viruses;Pithoviruses;Pithovirus.	Pithovirus	dsDNA
TRINITY_DN946_c0_g1_i3	YP_009001225.1	2120	29.905	525	325	15	145	1674	68	564	6.45e-56	204	ABC transporter [Pithovirus sibericum].	Pithovirus sibericum	Viruses;Pithoviruses;Pithovirus.	Pithovirus	dsDNA
TRINITY_DN9331_c0_g1_i7	YP_010778125.1	4247	28.626	524	323	13	1603	3099	36	533	4.53e-50	193	putative ATP-dependent RNA helicase [Bodo saltans virus].	Bodo saltans virus	Viruses;Varidnaviria;Bamfordvirae;Nucleocytoviricota;Megaviricetes;Imitervirales;Mimiviridae;Klosneuvirinae;Theiavirus;Theiavirussalishense.	Mimiviridae	dsDNA
TRINITY_DN946_c0_g1_i4	YP_010778125.1	4031	28.626	524	323	13	1387	2883	36	533	4.14e-50	193	putative ATP-dependent RNA helicase [Bodo saltans virus].	Bodo saltans virus	Viruses;Varidnaviria;Bamfordvirae;Nucleocytoviricota;Megaviricetes;Imitervirales;Mimiviridae;Klosneuvirinae;Theiavirus;Theiavirussalishense.	Mimiviridae	dsDNA
TRINITY_DN38827_c0_g1_i5	YP_010803136.1	3306	25	524	334	14	639	2132	38	528	2.19e-27	123	HrpA-like RNA helicase [Fadolivirus algeromassiliense].	Fadolivirus algeromassiliense	Viruses;Varidnaviria;Bamfordvirae;Nucleocytoviricota;Megaviricetes;Imitervirales;Mimiviridae;Klosneuvirinae;Fadolivirus.	Mimiviridae	dsDNA
TRINITY_DN2005_c0_g1_i2	YP_010803136.1	3217	25	524	334	14	550	2043	38	528	2.45e-27	122	HrpA-like RNA helicase [Fadolivirus algeromassiliense].	Fadolivirus algeromassiliense	Viruses;Varidnaviria;Bamfordvirae;Nucleocytoviricota;Megaviricetes;Imitervirales;Mimiviridae;Klosneuvirinae;Fadolivirus.	Mimiviridae	dsDNA
TRINITY_DN20382_c0_g1_i1	YP_009177124.1	6269	30.402	523	338	11	4990	3464	28	538	9.53e-49	191	ankyrin repeat family protein [Turkeypox virus].	Turkeypox virus	Viruses;Varidnaviria;Bamfordvirae;Nucleocytoviricota;Pokkesviricetes;Chitovirales;Poxviridae;Chordopoxvirinae;Avipoxvirus.	Poxviridae	dsDNA
TRINITY_DN13006_c0_g1_i21	YP_009177124.1	6203	30.402	523	338	11	4924	3398	28	538	9.39e-49	191	ankyrin repeat family protein [Turkeypox virus].	Turkeypox virus	Viruses;Varidnaviria;Bamfordvirae;Nucleocytoviricota;Pokkesviricetes;Chitovirales;Poxviridae;Chordopoxvirinae;Avipoxvirus.	Poxviridae	dsDNA
TRINITY_DN105823_c0_g1_i6	YP_009177124.1	6095	30.402	523	338	11	4816	3290	28	538	9.15e-49	191	ankyrin repeat family protein [Turkeypox virus].	Turkeypox virus	Viruses;Varidnaviria;Bamfordvirae;Nucleocytoviricota;Pokkesviricetes;Chitovirales;Poxviridae;Chordopoxvirinae;Avipoxvirus.	Poxviridae	dsDNA
TRINITY_DN105823_c0_g1_i7	YP_009177124.1	6011	30.402	523	338	11	4732	3206	28	538	4.56e-49	192	ankyrin repeat family protein [Turkeypox virus].	Turkeypox virus	Viruses;Varidnaviria;Bamfordvirae;Nucleocytoviricota;Pokkesviricetes;Chitovirales;Poxviridae;Chordopoxvirinae;Avipoxvirus.	Poxviridae	dsDNA
TRINITY_DN339637_c0_g1_i2	YP_009177124.1	5780	30.402	523	338	11	4501	2975	28	538	8.46e-49	191	ankyrin repeat family protein [Turkeypox virus].	Turkeypox virus	Viruses;Varidnaviria;Bamfordvirae;Nucleocytoviricota;Pokkesviricetes;Chitovirales;Poxviridae;Chordopoxvirinae;Avipoxvirus.	Poxviridae	dsDNA
TRINITY_DN1473_c0_g3_i3	YP_010778125.1	3892	30.593	523	326	16	2129	648	59	573	4.11e-63	232	putative ATP-dependent RNA helicase [Bodo saltans virus].	Bodo saltans virus	Viruses;Varidnaviria;Bamfordvirae;Nucleocytoviricota;Megaviricetes;Imitervirales;Mimiviridae;Klosneuvirinae;Theiavirus;Theiavirussalishense.	Mimiviridae	dsDNA
TRINITY_DN2920_c0_g1_i28	YP_009177124.1	3571	30.402	523	338	11	2292	766	28	538	1.68e-49	192	ankyrin repeat family protein [Turkeypox virus].	Turkeypox virus	Viruses;Varidnaviria;Bamfordvirae;Nucleocytoviricota;Pokkesviricetes;Chitovirales;Poxviridae;Chordopoxvirinae;Avipoxvirus.	Poxviridae	dsDNA
TRINITY_DN138075_c0_g1_i13	YP_010778125.1	3380	30.593	523	326	16	2129	648	59	573	2.29e-63	232	putative ATP-dependent RNA helicase [Bodo saltans virus].	Bodo saltans virus	Viruses;Varidnaviria;Bamfordvirae;Nucleocytoviricota;Megaviricetes;Imitervirales;Mimiviridae;Klosneuvirinae;Theiavirus;Theiavirussalishense.	Mimiviridae	dsDNA
TRINITY_DN13342_c0_g1_i7	YP_010778125.1	2776	30.593	523	326	16	2129	648	59	573	5.13e-64	232	putative ATP-dependent RNA helicase [Bodo saltans virus].	Bodo saltans virus	Viruses;Varidnaviria;Bamfordvirae;Nucleocytoviricota;Megaviricetes;Imitervirales;Mimiviridae;Klosneuvirinae;Theiavirus;Theiavirussalishense.	Mimiviridae	dsDNA
TRINITY_DN64509_c0_g1_i5	YP_010781219.1	2680	34.608	523	311	10	1953	424	29	533	2.25e-91	303	arginyl tRNA-synthetase [Tupanvirus deep ocean].	Tupanvirus deep ocean	Viruses;Varidnaviria;Bamfordvirae;Nucleocytoviricota;Megaviricetes;Imitervirales;Mimiviridae;Megamimivirinae;Tupanvirus.	Mimiviridae	dsDNA
TRINITY_DN3427_c0_g1_i16	YP_010780181.1	1984	25.239	523	305	19	388	1854	3	473	3.48e-26	117	hypothetical protein QJ856_gp1184 [Tupanvirus deep ocean].	Tupanvirus deep ocean	Viruses;Varidnaviria;Bamfordvirae;Nucleocytoviricota;Megaviricetes;Imitervirales;Mimiviridae;Megamimivirinae;Tupanvirus.	Mimiviridae	dsDNA
TRINITY_DN2516_c0_g1_i19	YP_010803663.1	2195	36.59	522	307	10	1766	225	4	509	2.5e-111	352	class II glycyl-tRNA synthetase [Fadolivirus algeromassiliense].	Fadolivirus algeromassiliense	Viruses;Varidnaviria;Bamfordvirae;Nucleocytoviricota;Megaviricetes;Imitervirales;Mimiviridae;Klosneuvirinae;Fadolivirus.	Mimiviridae	dsDNA
TRINITY_DN2516_c0_g1_i14	YP_010803678.1	2523	38.388	521	291	8	543	2072	5	506	4.35e-115	363	ABC transporter [Fadolivirus algeromassiliense].	Fadolivirus algeromassiliense	Viruses;Varidnaviria;Bamfordvirae;Nucleocytoviricota;Megaviricetes;Imitervirales;Mimiviridae;Klosneuvirinae;Fadolivirus.	Mimiviridae	dsDNA
TRINITY_DN2516_c0_g1_i4	YP_009001498.1	8261	28.846	520	321	13	2692	4224	205	684	1.3e-53	212	ABC transporter [Anomala cuprea entomopoxvirus].	Anomala cuprea entomopoxvirus	Viruses;Varidnaviria;Bamfordvirae;Nucleocytoviricota;Pokkesviricetes;Chitovirales;Poxviridae;Entomopoxvirinae;Alphaentomopoxvirus.	Poxviridae	dsDNA
TRINITY_DN2516_c0_g1_i31	YP_009001498.1	8008	28.846	520	321	13	2692	4224	205	684	1.18e-53	212	ABC transporter [Anomala cuprea entomopoxvirus].	Anomala cuprea entomopoxvirus	Viruses;Varidnaviria;Bamfordvirae;Nucleocytoviricota;Pokkesviricetes;Chitovirales;Poxviridae;Entomopoxvirinae;Alphaentomopoxvirus.	Poxviridae	dsDNA
TRINITY_DN2516_c0_g1_i13	YP_009001498.1	7887	28.846	520	321	13	2692	4224	205	684	9.69e-54	212	ABC transporter [Anomala cuprea entomopoxvirus].	Anomala cuprea entomopoxvirus	Viruses;Varidnaviria;Bamfordvirae;Nucleocytoviricota;Pokkesviricetes;Chitovirales;Poxviridae;Entomopoxvirinae;Alphaentomopoxvirus.	Poxviridae	dsDNA
TRINITY_DN2516_c0_g1_i39	YP_009001498.1	7827	28.846	520	321	13	2692	4224	205	684	9.57e-54	212	ABC transporter [Anomala cuprea entomopoxvirus].	Anomala cuprea entomopoxvirus	Viruses;Varidnaviria;Bamfordvirae;Nucleocytoviricota;Pokkesviricetes;Chitovirales;Poxviridae;Entomopoxvirinae;Alphaentomopoxvirus.	Poxviridae	dsDNA
TRINITY_DN2516_c0_g1_i6	YP_009001498.1	7777	28.846	520	321	13	2692	4224	205	684	9.88e-54	212	ABC transporter [Anomala cuprea entomopoxvirus].	Anomala cuprea entomopoxvirus	Viruses;Varidnaviria;Bamfordvirae;Nucleocytoviricota;Pokkesviricetes;Chitovirales;Poxviridae;Entomopoxvirinae;Alphaentomopoxvirus.	Poxviridae	dsDNA
TRINITY_DN2516_c0_g1_i17	YP_009001498.1	5774	28.654	520	322	13	2692	4224	205	684	4.89e-54	213	ABC transporter [Anomala cuprea entomopoxvirus].	Anomala cuprea entomopoxvirus	Viruses;Varidnaviria;Bamfordvirae;Nucleocytoviricota;Pokkesviricetes;Chitovirales;Poxviridae;Entomopoxvirinae;Alphaentomopoxvirus.	Poxviridae	dsDNA
TRINITY_DN2020_c0_g1_i3	YP_009325872.1	4008	23.462	520	326	18	2660	1122	159	613	1.35e-19	98.6	SerThr protein phosphatase 6 regulatory ankyrin repeat subunit Blike [Only Syngen Nebraska virus 5].	Only Syngen Nebraska virus 5	Viruses;Varidnaviria;Bamfordvirae;Nucleocytoviricota;Megaviricetes;Algavirales;Phycodnaviridae;Chlorovirus.	Phycodnaviridae	dsDNA
TRINITY_DN339637_c0_g1_i1	YP_009325872.1	3766	23.462	520	326	18	2418	880	159	613	1.43e-19	98.6	SerThr protein phosphatase 6 regulatory ankyrin repeat subunit Blike [Only Syngen Nebraska virus 5].	Only Syngen Nebraska virus 5	Viruses;Varidnaviria;Bamfordvirae;Nucleocytoviricota;Megaviricetes;Algavirales;Phycodnaviridae;Chlorovirus.	Phycodnaviridae	dsDNA
TRINITY_DN715_c0_g1_i43	YP_009325872.1	3683	23.462	520	326	18	2660	1122	159	613	1.2e-19	98.6	SerThr protein phosphatase 6 regulatory ankyrin repeat subunit Blike [Only Syngen Nebraska virus 5].	Only Syngen Nebraska virus 5	Viruses;Varidnaviria;Bamfordvirae;Nucleocytoviricota;Megaviricetes;Algavirales;Phycodnaviridae;Chlorovirus.	Phycodnaviridae	dsDNA
TRINITY_DN66844_c0_g1_i13	YP_009325872.1	3105	23.462	520	326	18	2173	635	159	613	8.33e-20	99	SerThr protein phosphatase 6 regulatory ankyrin repeat subunit Blike [Only Syngen Nebraska virus 5].	Only Syngen Nebraska virus 5	Viruses;Varidnaviria;Bamfordvirae;Nucleocytoviricota;Megaviricetes;Algavirales;Phycodnaviridae;Chlorovirus.	Phycodnaviridae	dsDNA
TRINITY_DN21189_c0_g2_i4	YP_009325872.1	3027	23.462	520	326	18	2660	1122	159	613	7.78e-20	99	SerThr protein phosphatase 6 regulatory ankyrin repeat subunit Blike [Only Syngen Nebraska virus 5].	Only Syngen Nebraska virus 5	Viruses;Varidnaviria;Bamfordvirae;Nucleocytoviricota;Megaviricetes;Algavirales;Phycodnaviridae;Chlorovirus.	Phycodnaviridae	dsDNA
TRINITY_DN661_c3_g1_i3	YP_010780309.1	3009	28.846	520	317	21	2809	1265	1020	1491	4.55e-40	165	NcpA [Tupanvirus deep ocean].	Tupanvirus deep ocean	Viruses;Varidnaviria;Bamfordvirae;Nucleocytoviricota;Megaviricetes;Imitervirales;Mimiviridae;Megamimivirinae;Tupanvirus.	Mimiviridae	dsDNA
TRINITY_DN9469_c0_g1_i2	YP_010780309.1	2997	28.846	520	317	21	2809	1265	1020	1491	6.44e-40	164	NcpA [Tupanvirus deep ocean].	Tupanvirus deep ocean	Viruses;Varidnaviria;Bamfordvirae;Nucleocytoviricota;Megaviricetes;Imitervirales;Mimiviridae;Megamimivirinae;Tupanvirus.	Mimiviridae	dsDNA
TRINITY_DN661_c3_g1_i2	YP_003969699.1	2787	26.346	520	326	12	1795	266	2	474	8.48e-42	166	putative metalloendopeptidase [Cafeteria roenbergensis virusBV-PW1].	Cafeteria roenbergensis virus BV-PW1	Viruses;Varidnaviria;Bamfordvirae;Nucleocytoviricota;Megaviricetes;Imitervirales;Mimiviridae;Aliimimivirinae;Rheavirus;Rheavirussinusmexicani.	Mimiviridae	dsDNA
TRINITY_DN21093_c0_g1_i22	YP_009001225.1	2141	29.808	520	323	14	178	1695	73	564	8.57e-56	204	ABC transporter [Pithovirus sibericum].	Pithovirus sibericum	Viruses;Pithoviruses;Pithovirus.	Pithovirus	dsDNA
TRINITY_DN15225_c8_g1_i7	YP_003969699.1	2981	20.039	519	369	16	750	2282	2	482	3.39e-05	51.2	putative metalloendopeptidase [Cafeteria roenbergensis virusBV-PW1].	Cafeteria roenbergensis virus BV-PW1	Viruses;Varidnaviria;Bamfordvirae;Nucleocytoviricota;Megaviricetes;Imitervirales;Mimiviridae;Aliimimivirinae;Rheavirus;Rheavirussinusmexicani.	Mimiviridae	dsDNA
TRINITY_DN15225_c8_g1_i9	YP_003969699.1	2505	28.324	519	290	15	839	2356	170	619	3.33e-45	176	putative metalloendopeptidase [Cafeteria roenbergensis virusBV-PW1].	Cafeteria roenbergensis virus BV-PW1	Viruses;Varidnaviria;Bamfordvirae;Nucleocytoviricota;Megaviricetes;Imitervirales;Mimiviridae;Aliimimivirinae;Rheavirus;Rheavirussinusmexicani.	Mimiviridae	dsDNA
TRINITY_DN14238_c4_g1_i1	YP_010796784.1	2141	23.507	519	281	19	385	1923	17	425	3.26e-20	98.2	putative gamma-glutamyl transpeptidase [Diachasmimorphalongicaudata entomopoxvirus].	Diachasmimorpha longicaudata entomopoxvirus	Viruses;Varidnaviria;Bamfordvirae;Nucleocytoviricota;Pokkesviricetes;Chitovirales;Poxviridae;Entomopoxvirinae;Diachasmimorphaentomopoxvirus.	Poxviridae	dsDNA
TRINITY_DN8104_c0_g2_i4	YP_010781689.1	6098	49.807	518	226	5	4378	5862	18	524	6.57e-165	518	prolyl-tRNA synthetase [Tupanvirus soda lake].	Tupanvirus soda lake	Viruses;Varidnaviria;Bamfordvirae;Nucleocytoviricota;Megaviricetes;Imitervirales;Mimiviridae;Megamimivirinae;Tupanvirus.	Mimiviridae	dsDNA
TRINITY_DN12867_c0_g1_i3	YP_010781689.1	5389	49.807	518	226	5	3669	5153	18	524	3.77e-166	518	prolyl-tRNA synthetase [Tupanvirus soda lake].	Tupanvirus soda lake	Viruses;Varidnaviria;Bamfordvirae;Nucleocytoviricota;Megaviricetes;Imitervirales;Mimiviridae;Megamimivirinae;Tupanvirus.	Mimiviridae	dsDNA
TRINITY_DN12867_c0_g1_i2	YP_010781689.1	5148	49.807	518	226	5	3428	4912	18	524	1.17e-166	518	prolyl-tRNA synthetase [Tupanvirus soda lake].	Tupanvirus soda lake	Viruses;Varidnaviria;Bamfordvirae;Nucleocytoviricota;Megaviricetes;Imitervirales;Mimiviridae;Megamimivirinae;Tupanvirus.	Mimiviridae	dsDNA
TRINITY_DN12867_c0_g1_i10	YP_010781689.1	4940	49.807	518	226	5	3220	4704	18	524	3.89e-167	518	prolyl-tRNA synthetase [Tupanvirus soda lake].	Tupanvirus soda lake	Viruses;Varidnaviria;Bamfordvirae;Nucleocytoviricota;Megaviricetes;Imitervirales;Mimiviridae;Megamimivirinae;Tupanvirus.	Mimiviridae	dsDNA
TRINITY_DN5074_c0_g1_i27	YP_009325872.1	4008	23.359	518	308	15	1913	546	10	500	4.63e-19	97.1	SerThr protein phosphatase 6 regulatory ankyrin repeat subunit Blike [Only Syngen Nebraska virus 5].	Only Syngen Nebraska virus 5	Viruses;Varidnaviria;Bamfordvirae;Nucleocytoviricota;Megaviricetes;Algavirales;Phycodnaviridae;Chlorovirus.	Phycodnaviridae	dsDNA
TRINITY_DN60771_c0_g1_i7	YP_009325872.1	3766	23.359	518	308	15	1671	304	10	500	3.13e-19	97.4	SerThr protein phosphatase 6 regulatory ankyrin repeat subunit Blike [Only Syngen Nebraska virus 5].	Only Syngen Nebraska virus 5	Viruses;Varidnaviria;Bamfordvirae;Nucleocytoviricota;Megaviricetes;Algavirales;Phycodnaviridae;Chlorovirus.	Phycodnaviridae	dsDNA
TRINITY_DN61702_c0_g1_i3	YP_009325872.1	3683	23.359	518	308	15	1913	546	10	500	4.09e-19	97.1	SerThr protein phosphatase 6 regulatory ankyrin repeat subunit Blike [Only Syngen Nebraska virus 5].	Only Syngen Nebraska virus 5	Viruses;Varidnaviria;Bamfordvirae;Nucleocytoviricota;Megaviricetes;Algavirales;Phycodnaviridae;Chlorovirus.	Phycodnaviridae	dsDNA
TRINITY_DN20200_c0_g1_i6	YP_009325872.1	3027	23.359	518	308	15	1913	546	10	500	4e-19	96.7	SerThr protein phosphatase 6 regulatory ankyrin repeat subunit Blike [Only Syngen Nebraska virus 5].	Only Syngen Nebraska virus 5	Viruses;Varidnaviria;Bamfordvirae;Nucleocytoviricota;Megaviricetes;Algavirales;Phycodnaviridae;Chlorovirus.	Phycodnaviridae	dsDNA
TRINITY_DN715_c0_g1_i6	YP_010842284.1	2797	27.413	518	249	21	630	2054	118	551	5.98e-26	117	GMc oxidoreductase [Cotonvirus japonicus].	Cotonvirus japonicus	Viruses;Varidnaviria;Bamfordvirae;Nucleocytoviricota;Megaviricetes;Imitervirales;Mimiviridae;Megamimivirinae;Cotonvirus;Cotonvirusjaponicum.	Mimiviridae	dsDNA
TRINITY_DN65280_c0_g1_i1	YP_010803173.1	2687	27.413	518	292	14	2518	1190	2	510	2.02e-43	169	transcription factor GTP-binding domain protein [Fadolivirusalgeromassiliense].	Fadolivirus algeromassiliense	Viruses;Varidnaviria;Bamfordvirae;Nucleocytoviricota;Megaviricetes;Imitervirales;Mimiviridae;Klosneuvirinae;Fadolivirus.	Mimiviridae	dsDNA
TRINITY_DN142_c0_g1_i1	NP_570296.1	2179	27.606	518	336	9	1832	318	32	523	1.01e-59	214	SPV136 kelch-like protein [Swinepox virus].	Swinepox virus	Viruses;Varidnaviria;Bamfordvirae;Nucleocytoviricota;Pokkesviricetes;Chitovirales;Poxviridae;Chordopoxvirinae;Suipoxvirus.	Poxviridae	dsDNA
TRINITY_DN142_c0_g1_i3	YP_010803041.1	5458	32.108	517	322	9	3790	2255	377	869	2.21e-78	283	leucyl-tRNA synthetase class IA [Fadolivirus algeromassiliense].	Fadolivirus algeromassiliense	Viruses;Varidnaviria;Bamfordvirae;Nucleocytoviricota;Megaviricetes;Imitervirales;Mimiviridae;Klosneuvirinae;Fadolivirus.	Mimiviridae	dsDNA
TRINITY_DN142_c0_g1_i9	YP_010803041.1	5322	32.108	517	322	9	3654	2119	377	869	1.9e-78	284	leucyl-tRNA synthetase class IA [Fadolivirus algeromassiliense].	Fadolivirus algeromassiliense	Viruses;Varidnaviria;Bamfordvirae;Nucleocytoviricota;Megaviricetes;Imitervirales;Mimiviridae;Klosneuvirinae;Fadolivirus.	Mimiviridae	dsDNA
TRINITY_DN20200_c0_g1_i1	YP_010803041.1	4307	32.108	517	322	9	2639	1104	377	869	9.02e-79	284	leucyl-tRNA synthetase class IA [Fadolivirus algeromassiliense].	Fadolivirus algeromassiliense	Viruses;Varidnaviria;Bamfordvirae;Nucleocytoviricota;Megaviricetes;Imitervirales;Mimiviridae;Klosneuvirinae;Fadolivirus.	Mimiviridae	dsDNA
TRINITY_DN21163_c0_g1_i18	YP_010803041.1	4245	32.108	517	322	9	2577	1042	377	869	9.98e-79	283	leucyl-tRNA synthetase class IA [Fadolivirus algeromassiliense].	Fadolivirus algeromassiliense	Viruses;Varidnaviria;Bamfordvirae;Nucleocytoviricota;Megaviricetes;Imitervirales;Mimiviridae;Klosneuvirinae;Fadolivirus.	Mimiviridae	dsDNA
TRINITY_DN3466_c0_g1_i9	YP_010802393.1	1877	27.466	517	322	17	120	1577	4	498	1.36e-30	129	VP1 [Lupine feces-associated densovirus 2].	Lupine feces-associated densovirus 2	Viruses;Monodnaviria;Shotokuvirae;Cossaviricota;Quintoviricetes;Piccovirales;Parvoviridae;Densovirinae;Tetuambidensovirus;Tetuambidensovirusincertum2.	Parvoviridae	ssDNA(+-)
TRINITY_DN3453_c0_g1_i22	YP_010804160.1	3696	23.837	516	292	17	510	1862	47	526	7.86e-20	99	long-chain fatty acid CoA synthetase [Fadolivirusalgeromassiliense].	Fadolivirus algeromassiliense	Viruses;Varidnaviria;Bamfordvirae;Nucleocytoviricota;Megaviricetes;Imitervirales;Mimiviridae;Klosneuvirinae;Fadolivirus.	Mimiviridae	dsDNA
TRINITY_DN1118_c0_g2_i4	YP_009483690.1	2807	25.581	516	296	19	2257	809	59	519	3.88e-34	142	Carboxylic ester hydrolase [Pandoravirus quercus].	Pandoravirus quercus	Viruses;Pandoravirus.	Pandoravirus	dsDNA
TRINITY_DN1118_c0_g2_i3	YP_009483690.1	2653	28.101	516	294	18	735	2174	42	516	2.11e-38	155	Carboxylic ester hydrolase [Pandoravirus quercus].	Pandoravirus quercus	Viruses;Pandoravirus.	Pandoravirus	dsDNA
TRINITY_DN1118_c0_g2_i2	YP_009046239.1	2632	28.876	516	285	11	1830	403	16	489	2.67e-37	152	ankyrin repeat protein [Penguinpox virus].	Penguinpox virus	Viruses;Varidnaviria;Bamfordvirae;Nucleocytoviricota;Pokkesviricetes;Chitovirales;Poxviridae;Chordopoxvirinae;Avipoxvirus.	Poxviridae	dsDNA
TRINITY_DN10984_c0_g2_i3	YP_009483690.1	2621	28.101	516	294	18	703	2142	42	516	2.04e-38	155	Carboxylic ester hydrolase [Pandoravirus quercus].	Pandoravirus quercus	Viruses;Pandoravirus.	Pandoravirus	dsDNA
TRINITY_DN21163_c0_g1_i26	YP_009483690.1	2451	25.581	516	296	19	2257	809	59	519	2.65e-34	142	Carboxylic ester hydrolase [Pandoravirus quercus].	Pandoravirus quercus	Viruses;Pandoravirus.	Pandoravirus	dsDNA
TRINITY_DN3683_c0_g1_i8	YP_010842074.1	2058	29.07	516	329	16	1860	376	2	501	1.5e-60	215	methionyl-tRNA synthetase [Cotonvirus japonicus].	Cotonvirus japonicus	Viruses;Varidnaviria;Bamfordvirae;Nucleocytoviricota;Megaviricetes;Imitervirales;Mimiviridae;Megamimivirinae;Cotonvirus;Cotonvirusjaponicum.	Mimiviridae	dsDNA
TRINITY_DN3683_c0_g1_i1	YP_009001498.1	1617	26.55	516	315	16	1614	94	544	1004	8.64e-44	170	ABC transporter [Anomala cuprea entomopoxvirus].	Anomala cuprea entomopoxvirus	Viruses;Varidnaviria;Bamfordvirae;Nucleocytoviricota;Pokkesviricetes;Chitovirales;Poxviridae;Entomopoxvirinae;Alphaentomopoxvirus.	Poxviridae	dsDNA
TRINITY_DN3683_c0_g1_i15	NP_570746.1	6053	24.272	515	263	23	1910	600	113	578	1.01e-15	86.7	complement binding protein [Macacine gammaherpesvirus 5].	Macacine gammaherpesvirus 5	Viruses;Duplodnaviria;Heunggongvirae;Peploviricota;Herviviricetes;Herpesvirales;Orthoherpesviridae;Gammaherpesvirinae;Rhadinovirus;Rhadinovirusmacacinegamma5.	Orthoherpesviridae	dsDNA
TRINITY_DN3683_c0_g1_i3	NP_570746.1	5794	24.272	515	263	23	1910	600	113	578	9.56e-16	86.7	complement binding protein [Macacine gammaherpesvirus 5].	Macacine gammaherpesvirus 5	Viruses;Duplodnaviria;Heunggongvirae;Peploviricota;Herviviricetes;Herpesvirales;Orthoherpesviridae;Gammaherpesvirinae;Rhadinovirus;Rhadinovirusmacacinegamma5.	Orthoherpesviridae	dsDNA
TRINITY_DN16487_c3_g1_i4	YP_010803098.1	2393	37.476	515	291	9	1842	361	3	507	8.35e-104	332	lysyl-tRNA ligase class II [Fadolivirus algeromassiliense].	Fadolivirus algeromassiliense	Viruses;Varidnaviria;Bamfordvirae;Nucleocytoviricota;Megaviricetes;Imitervirales;Mimiviridae;Klosneuvirinae;Fadolivirus.	Mimiviridae	dsDNA
TRINITY_DN41334_c0_g2_i1	YP_010802393.1	2089	26.796	515	329	16	120	1580	4	498	1.51e-31	133	VP1 [Lupine feces-associated densovirus 2].	Lupine feces-associated densovirus 2	Viruses;Monodnaviria;Shotokuvirae;Cossaviricota;Quintoviricetes;Piccovirales;Parvoviridae;Densovirinae;Tetuambidensovirus;Tetuambidensovirusincertum2.	Parvoviridae	ssDNA(+-)
TRINITY_DN53619_c2_g1_i4	YP_758442.1	2416	28.016	514	347	10	517	2034	51	549	5.05e-63	224	egt [Leucania separata nucleopolyhedrovirus].	Leucania separata nucleopolyhedrovirus	Viruses;Naldaviricetes;Lefavirales;Baculoviridae;Alphabaculovirus;Alphabaculovirusleseparatae.	Baculoviridae	dsDNA
TRINITY_DN16039_c0_g1_i2	NP_619974.1	3792	20.858	513	338	17	3568	2084	19	481	2.22e-10	68.6	CPXV193 protein [Cowpox virus].	Cowpox virus	Viruses;Varidnaviria;Bamfordvirae;Nucleocytoviricota;Pokkesviricetes;Chitovirales;Poxviridae;Chordopoxvirinae;Orthopoxvirus.	Poxviridae	dsDNA
TRINITY_DN88205_c1_g1_i1	YP_010781615.1	3732	49.903	513	242	7	379	1887	5	512	2.09e-169	515	lysine-tRNA synthetase [Tupanvirus soda lake].	Tupanvirus soda lake	Viruses;Varidnaviria;Bamfordvirae;Nucleocytoviricota;Megaviricetes;Imitervirales;Mimiviridae;Megamimivirinae;Tupanvirus.	Mimiviridae	dsDNA
TRINITY_DN4782_c0_g1_i1	YP_010796961.1	3625	30.214	513	293	13	3347	1935	124	613	3.46e-132	200	PolB [Mayetiola barley midge adintovirus].	Mayetiola barley midge adintovirus	Viruses;Varidnaviria;Bamfordvirae;Preplasmiviricota;Polintoviricetes;Orthopolintovirales;Adintoviridae;Alphadintovirus;Alphadintovirusmayetiola.	Adintoviridae	dsDNA
TRINITY_DN4782_c0_g1_i2	YP_010781615.1	3563	49.903	513	242	7	210	1718	5	512	6.53e-170	515	lysine-tRNA synthetase [Tupanvirus soda lake].	Tupanvirus soda lake	Viruses;Varidnaviria;Bamfordvirae;Nucleocytoviricota;Megaviricetes;Imitervirales;Mimiviridae;Megamimivirinae;Tupanvirus.	Mimiviridae	dsDNA
TRINITY_DN2233_c0_g2_i9	YP_009665578.1	2454	21.442	513	313	16	782	2227	129	582	1.65e-05	52.4	ATPase [Paramecium bursaria Chlorella virus NYs1].	Paramecium bursaria Chlorella virus NYs1	Viruses;Varidnaviria;Bamfordvirae;Nucleocytoviricota;Megaviricetes;Algavirales;Phycodnaviridae;Chlorovirus.	Phycodnaviridae	dsDNA
TRINITY_DN21189_c0_g2_i3	YP_009481512.1	2028	25.536	513	293	17	163	1593	49	508	1.07e-30	130	Carboxylic ester hydrolase [Pandoravirus macleodensis].	Pandoravirus macleodensis	Viruses;Pandoravirus.	Pandoravirus	dsDNA
TRINITY_DN11845_c0_g1_i6	YP_010841542.1	5878	39.844	512	262	5	2381	3895	394	866	6.13e-25	117	collagen-like protein [Cotonvirus japonicus].	Cotonvirus japonicus	Viruses;Varidnaviria;Bamfordvirae;Nucleocytoviricota;Megaviricetes;Imitervirales;Mimiviridae;Megamimivirinae;Cotonvirus;Cotonvirusjaponicum.	Mimiviridae	dsDNA
TRINITY_DN11845_c0_g1_i4	YP_010781461.1	3479	28.906	512	298	17	609	2090	94	557	3.64e-53	204	aminopeptidase M1-like [Tupanvirus soda lake].	Tupanvirus soda lake	Viruses;Varidnaviria;Bamfordvirae;Nucleocytoviricota;Megaviricetes;Imitervirales;Mimiviridae;Megamimivirinae;Tupanvirus.	Mimiviridae	dsDNA
TRINITY_DN54736_c0_g1_i4	YP_010804160.1	2904	25.195	512	332	16	1051	2520	56	538	1.82e-23	110	long-chain fatty acid CoA synthetase [Fadolivirusalgeromassiliense].	Fadolivirus algeromassiliense	Viruses;Varidnaviria;Bamfordvirae;Nucleocytoviricota;Megaviricetes;Imitervirales;Mimiviridae;Klosneuvirinae;Fadolivirus.	Mimiviridae	dsDNA
TRINITY_DN54736_c0_g1_i9	NP_570746.1	4595	24.658	511	296	24	4004	2661	19	503	8.16e-27	121	complement binding protein [Macacine gammaherpesvirus 5].	Macacine gammaherpesvirus 5	Viruses;Duplodnaviria;Heunggongvirae;Peploviricota;Herviviricetes;Herpesvirales;Orthoherpesviridae;Gammaherpesvirinae;Rhadinovirus;Rhadinovirusmacacinegamma5.	Orthoherpesviridae	dsDNA
TRINITY_DN793_c0_g1_i29	NP_570746.1	4352	24.658	511	296	24	3761	2418	19	503	6.44e-27	121	complement binding protein [Macacine gammaherpesvirus 5].	Macacine gammaherpesvirus 5	Viruses;Duplodnaviria;Heunggongvirae;Peploviricota;Herviviricetes;Herpesvirales;Orthoherpesviridae;Gammaherpesvirinae;Rhadinovirus;Rhadinovirusmacacinegamma5.	Orthoherpesviridae	dsDNA
TRINITY_DN51233_c0_g1_i1	YP_010778819.1	2106	25.832	511	334	16	1960	527	56	554	6.29e-36	147	dynamin-like protein [Bodo saltans virus].	Bodo saltans virus	Viruses;Varidnaviria;Bamfordvirae;Nucleocytoviricota;Megaviricetes;Imitervirales;Mimiviridae;Klosneuvirinae;Theiavirus;Theiavirussalishense.	Mimiviridae	dsDNA
TRINITY_DN9132_c0_g1_i4	YP_010802393.1	1523	26.027	511	322	17	3	1436	11	498	1.95e-27	119	VP1 [Lupine feces-associated densovirus 2].	Lupine feces-associated densovirus 2	Viruses;Monodnaviria;Shotokuvirae;Cossaviricota;Quintoviricetes;Piccovirales;Parvoviridae;Densovirinae;Tetuambidensovirus;Tetuambidensovirusincertum2.	Parvoviridae	ssDNA(+-)
TRINITY_DN54419_c1_g1_i16	YP_010803174.1	3479	23.333	510	329	21	2004	589	54	539	5.49e-15	82.8	ABC transporter type 1 transmembrane domain [Fadolivirusalgeromassiliense].	Fadolivirus algeromassiliense	Viruses;Varidnaviria;Bamfordvirae;Nucleocytoviricota;Megaviricetes;Imitervirales;Mimiviridae;Klosneuvirinae;Fadolivirus.	Mimiviridae	dsDNA
TRINITY_DN51233_c0_g1_i2	YP_010780537.1	2963	41.961	510	277	6	764	2284	10	503	5.9e-133	413	bifunctional glutamateproline tRNA-synthetase [Tupanvirus deepocean].	Tupanvirus deep ocean	Viruses;Varidnaviria;Bamfordvirae;Nucleocytoviricota;Megaviricetes;Imitervirales;Mimiviridae;Megamimivirinae;Tupanvirus.	Mimiviridae	dsDNA
TRINITY_DN55970_c0_g1_i7	YP_009448418.1	2200	33.725	510	280	13	330	1718	38	536	1.13e-75	258	Arginyl-tRNA synthetase [Orpheovirus IHUMI-LCC2].	Orpheovirus IHUMI-LCC2	Viruses;Varidnaviria;Bamfordvirae;Nucleocytoviricota;Megaviricetes;Algavirales;Phycodnaviridae.	Phycodnaviridae	dsDNA
TRINITY_DN4808_c0_g1_i3	YP_010796575.1	1682	30.784	510	323	17	1640	162	1	497	3.24e-60	210	EGT [Mythimna unipuncta nucleopolyhedrovirus].	Mythimna unipuncta nucleopolyhedrovirus	Viruses;Naldaviricetes;Lefavirales;Baculoviridae;Alphabaculovirus.	Baculoviridae	dsDNA
TRINITY_DN17614_c0_g1_i2	NP_570296.1	1600	20.98	510	311	16	1516	98	31	485	8.56e-24	108	SPV136 kelch-like protein [Swinepox virus].	Swinepox virus	Viruses;Varidnaviria;Bamfordvirae;Nucleocytoviricota;Pokkesviricetes;Chitovirales;Poxviridae;Chordopoxvirinae;Suipoxvirus.	Poxviridae	dsDNA
TRINITY_DN685_c0_g1_i3	YP_008378458.1	5053	26.719	509	329	14	1905	3404	18	491	3.03e-44	172	GTA [Choristoneura rosaceana nucleopolyhedrovirus].	Choristoneura rosaceana nucleopolyhedrovirus	Viruses;Naldaviricetes;Lefavirales;Baculoviridae;Alphabaculovirus;Alphabaculoviruschorosaceanae.	Baculoviridae	dsDNA
TRINITY_DN685_c0_g1_i12	YP_008378458.1	4737	26.719	509	329	14	1589	3088	18	491	2.78e-44	172	GTA [Choristoneura rosaceana nucleopolyhedrovirus].	Choristoneura rosaceana nucleopolyhedrovirus	Viruses;Naldaviricetes;Lefavirales;Baculoviridae;Alphabaculovirus;Alphabaculoviruschorosaceanae.	Baculoviridae	dsDNA
TRINITY_DN142_c0_g1_i7	YP_008378458.1	4510	26.719	509	329	14	1589	3088	18	491	2.6e-44	172	GTA [Choristoneura rosaceana nucleopolyhedrovirus].	Choristoneura rosaceana nucleopolyhedrovirus	Viruses;Naldaviricetes;Lefavirales;Baculoviridae;Alphabaculovirus;Alphabaculoviruschorosaceanae.	Baculoviridae	dsDNA
TRINITY_DN21163_c0_g1_i10	YP_008378458.1	4247	26.719	509	329	14	1589	3088	18	491	2.39e-44	172	GTA [Choristoneura rosaceana nucleopolyhedrovirus].	Choristoneura rosaceana nucleopolyhedrovirus	Viruses;Naldaviricetes;Lefavirales;Baculoviridae;Alphabaculovirus;Alphabaculoviruschorosaceanae.	Baculoviridae	dsDNA
TRINITY_DN3697_c0_g1_i20	YP_008378458.1	4014	26.719	509	329	14	1589	3088	18	491	2.07e-44	172	GTA [Choristoneura rosaceana nucleopolyhedrovirus].	Choristoneura rosaceana nucleopolyhedrovirus	Viruses;Naldaviricetes;Lefavirales;Baculoviridae;Alphabaculovirus;Alphabaculoviruschorosaceanae.	Baculoviridae	dsDNA
TRINITY_DN3697_c0_g1_i4	YP_008378458.1	3940	26.719	509	329	14	1589	3088	18	491	2.15e-44	172	GTA [Choristoneura rosaceana nucleopolyhedrovirus].	Choristoneura rosaceana nucleopolyhedrovirus	Viruses;Naldaviricetes;Lefavirales;Baculoviridae;Alphabaculovirus;Alphabaculoviruschorosaceanae.	Baculoviridae	dsDNA
TRINITY_DN3697_c0_g1_i16	YP_008378458.1	3775	26.719	509	329	14	884	2383	18	491	2.88e-44	172	GTA [Choristoneura rosaceana nucleopolyhedrovirus].	Choristoneura rosaceana nucleopolyhedrovirus	Viruses;Naldaviricetes;Lefavirales;Baculoviridae;Alphabaculovirus;Alphabaculoviruschorosaceanae.	Baculoviridae	dsDNA
TRINITY_DN14737_c0_g1_i9	YP_008378458.1	3530	26.719	509	329	14	1179	2678	18	491	1.82e-44	172	GTA [Choristoneura rosaceana nucleopolyhedrovirus].	Choristoneura rosaceana nucleopolyhedrovirus	Viruses;Naldaviricetes;Lefavirales;Baculoviridae;Alphabaculovirus;Alphabaculoviruschorosaceanae.	Baculoviridae	dsDNA
TRINITY_DN14737_c0_g1_i2	YP_003986584.1	2158	28.487	509	296	18	537	1991	86	550	7.22e-24	110	putative ankyrin repeat protein [Acanthamoeba polyphaga mimivirus].	Acanthamoeba polyphaga mimivirus	Viruses;Varidnaviria;Bamfordvirae;Nucleocytoviricota;Megaviricetes;Imitervirales;Mimiviridae;Megamimivirinae;Mimivirus;Mimivirusbradfordmassiliense.	Mimiviridae	dsDNA
TRINITY_DN14737_c0_g1_i3	YP_010796575.1	1740	30.648	509	327	9	142	1623	14	511	1.09e-72	244	EGT [Mythimna unipuncta nucleopolyhedrovirus].	Mythimna unipuncta nucleopolyhedrovirus	Viruses;Naldaviricetes;Lefavirales;Baculoviridae;Alphabaculovirus.	Baculoviridae	dsDNA
TRINITY_DN3697_c0_g1_i22	YP_010778819.1	1711	25.933	509	332	16	1559	132	58	554	2.9e-36	146	dynamin-like protein [Bodo saltans virus].	Bodo saltans virus	Viruses;Varidnaviria;Bamfordvirae;Nucleocytoviricota;Megaviricetes;Imitervirales;Mimiviridae;Klosneuvirinae;Theiavirus;Theiavirussalishense.	Mimiviridae	dsDNA
TRINITY_DN3697_c0_g1_i2	YP_009325865.1	4052	21.457	508	295	21	590	2041	138	565	0.015	43.5	ATPase [Only Syngen Nebraska virus 5].	Only Syngen Nebraska virus 5	Viruses;Varidnaviria;Bamfordvirae;Nucleocytoviricota;Megaviricetes;Algavirales;Phycodnaviridae;Chlorovirus.	Phycodnaviridae	dsDNA
TRINITY_DN9004_c0_g2_i5	YP_010788465.1	2000	28.543	508	204	9	1412	81	181	593	8.48e-14	79	collagen-like protein [Megavirus baoshan].	Megavirus baoshan	Viruses;Varidnaviria;Bamfordvirae;Nucleocytoviricota;Megaviricetes;Imitervirales;Mimiviridae;Megamimivirinae;Megavirus;Megavirusbaoshanense.	Mimiviridae	dsDNA
TRINITY_DN7311_c0_g1_i50	YP_010802560.1	1741	60.827	508	189	2	52	1569	90	589	0	660	DNA ligase III [Chrysodeixis includens nucleopolyhedrovirus].	Chrysodeixis includens nucleopolyhedrovirus	Viruses;Naldaviricetes;Lefavirales;Baculoviridae;Alphabaculovirus;Alphabaculovirusalterchrincludentis.	Baculoviridae	dsDNA
TRINITY_DN7311_c0_g1_i17	YP_010803998.1	1873	32.544	507	287	17	1631	171	5	476	3.1e-70	239	methionyl-tRNA synthetase [Fadolivirus algeromassiliense].	Fadolivirus algeromassiliense	Viruses;Varidnaviria;Bamfordvirae;Nucleocytoviricota;Megaviricetes;Imitervirales;Mimiviridae;Klosneuvirinae;Fadolivirus.	Mimiviridae	dsDNA
TRINITY_DN7311_c0_g1_i46	YP_010796575.1	2569	26.68	506	332	11	2319	859	13	498	6.65e-49	184	EGT [Mythimna unipuncta nucleopolyhedrovirus].	Mythimna unipuncta nucleopolyhedrovirus	Viruses;Naldaviricetes;Lefavirales;Baculoviridae;Alphabaculovirus.	Baculoviridae	dsDNA
TRINITY_DN88573_c0_g1_i2	YP_010804160.1	2533	23.913	506	284	17	1896	511	78	526	4.82e-20	99	long-chain fatty acid CoA synthetase [Fadolivirusalgeromassiliense].	Fadolivirus algeromassiliense	Viruses;Varidnaviria;Bamfordvirae;Nucleocytoviricota;Megaviricetes;Imitervirales;Mimiviridae;Klosneuvirinae;Fadolivirus.	Mimiviridae	dsDNA
TRINITY_DN16207_c0_g1_i1	YP_010796575.1	2506	26.68	506	332	11	2319	859	13	498	5.75e-49	184	EGT [Mythimna unipuncta nucleopolyhedrovirus].	Mythimna unipuncta nucleopolyhedrovirus	Viruses;Naldaviricetes;Lefavirales;Baculoviridae;Alphabaculovirus.	Baculoviridae	dsDNA
TRINITY_DN39365_c3_g1_i15	YP_009173627.1	2217	54.348	506	214	7	346	1830	2	501	4.27e-159	479	Hsp70 protein [Chrysochromulina ericina virus].	Chrysochromulina ericina virus	Viruses;Varidnaviria;Bamfordvirae;Nucleocytoviricota;Megaviricetes;Algavirales;Phycodnaviridae.	Phycodnaviridae	dsDNA
TRINITY_DN61702_c0_g1_i2	NP_570746.1	4595	23.762	505	320	23	4109	2652	107	565	5.88e-18	93.6	complement binding protein [Macacine gammaherpesvirus 5].	Macacine gammaherpesvirus 5	Viruses;Duplodnaviria;Heunggongvirae;Peploviricota;Herviviricetes;Herpesvirales;Orthoherpesviridae;Gammaherpesvirinae;Rhadinovirus;Rhadinovirusmacacinegamma5.	Orthoherpesviridae	dsDNA
TRINITY_DN80919_c0_g1_i1	NP_570746.1	4352	23.762	505	320	23	3866	2409	107	565	4.52e-18	93.6	complement binding protein [Macacine gammaherpesvirus 5].	Macacine gammaherpesvirus 5	Viruses;Duplodnaviria;Heunggongvirae;Peploviricota;Herviviricetes;Herpesvirales;Orthoherpesviridae;Gammaherpesvirinae;Rhadinovirus;Rhadinovirusmacacinegamma5.	Orthoherpesviridae	dsDNA
TRINITY_DN10683_c5_g1_i3	YP_009173627.1	3333	36.238	505	295	11	2778	1300	10	499	2.46e-89	305	Hsp70 protein [Chrysochromulina ericina virus].	Chrysochromulina ericina virus	Viruses;Varidnaviria;Bamfordvirae;Nucleocytoviricota;Megaviricetes;Algavirales;Phycodnaviridae.	Phycodnaviridae	dsDNA
TRINITY_DN7311_c0_g1_i13	YP_009173627.1	3254	36.04	505	296	10	2699	1221	10	499	2.19e-89	305	Hsp70 protein [Chrysochromulina ericina virus].	Chrysochromulina ericina virus	Viruses;Varidnaviria;Bamfordvirae;Nucleocytoviricota;Megaviricetes;Algavirales;Phycodnaviridae.	Phycodnaviridae	dsDNA
TRINITY_DN3800_c0_g1_i18	YP_919062.1	3017	27.921	505	336	11	1113	2582	122	613	2.37e-51	196	DNA helicase [Halorubrum virus BJ1].	Halorubrum virus BJ1	Viruses;Duplodnaviria;Heunggongvirae;Uroviricota;Caudoviricetes;Kirjokansivirales;Graaviviridae;Beejeyvirus;BeejeyvirusBJ1.	Graaviviridae	dsDNA
TRINITY_DN3800_c0_g1_i12	YP_010803161.1	4097	30.952	504	327	7	953	2443	32	521	6.92e-64	228	peptidase M16 [Fadolivirus algeromassiliense].	Fadolivirus algeromassiliense	Viruses;Varidnaviria;Bamfordvirae;Nucleocytoviricota;Megaviricetes;Imitervirales;Mimiviridae;Klosneuvirinae;Fadolivirus.	Mimiviridae	dsDNA
TRINITY_DN3800_c0_g1_i8	YP_010803532.1	3220	21.429	504	304	15	1012	2316	307	787	2.41e-12	75.1	eukaryotic translation elongation factor 2 [Fadolivirusalgeromassiliense].	Fadolivirus algeromassiliense	Viruses;Varidnaviria;Bamfordvirae;Nucleocytoviricota;Megaviricetes;Imitervirales;Mimiviridae;Klosneuvirinae;Fadolivirus.	Mimiviridae	dsDNA
TRINITY_DN3800_c0_g1_i14	YP_010803532.1	2585	21.429	504	304	15	1012	2316	307	787	1.74e-12	75.1	eukaryotic translation elongation factor 2 [Fadolivirusalgeromassiliense].	Fadolivirus algeromassiliense	Viruses;Varidnaviria;Bamfordvirae;Nucleocytoviricota;Megaviricetes;Imitervirales;Mimiviridae;Klosneuvirinae;Fadolivirus.	Mimiviridae	dsDNA
TRINITY_DN3800_c0_g1_i10	YP_010803532.1	2438	21.429	504	304	15	1012	2316	307	787	1.5e-12	75.1	eukaryotic translation elongation factor 2 [Fadolivirusalgeromassiliense].	Fadolivirus algeromassiliense	Viruses;Varidnaviria;Bamfordvirae;Nucleocytoviricota;Megaviricetes;Imitervirales;Mimiviridae;Klosneuvirinae;Fadolivirus.	Mimiviridae	dsDNA
TRINITY_DN3800_c0_g1_i3	YP_008052594.1	2129	24.008	504	319	15	454	1878	25	493	4.01e-21	102	DNA topoisomerase I [Phaeocystis globosa virus].	Phaeocystis globosa virus	Viruses;Varidnaviria;Bamfordvirae;Nucleocytoviricota;Megaviricetes;Algavirales;Phycodnaviridae;Prymnesiovirus.	Phycodnaviridae	dsDNA
TRINITY_DN15882_c0_g1_i2	NP_073525.1	3186	20.08	503	345	13	354	1820	97	556	7.6e-29	83.2	140R protein [Yaba-like disease virus].	Yaba-like disease virus	Viruses;Varidnaviria;Bamfordvirae;Nucleocytoviricota;Pokkesviricetes;Chitovirales;Poxviridae;Chordopoxvirinae;Yatapoxvirus;Tanapoxvirus.	Poxviridae	dsDNA
TRINITY_DN6977_c0_g1_i10	NP_073525.1	1946	24.453	503	339	12	372	1838	34	509	1.16e-33	138	140R protein [Yaba-like disease virus].	Yaba-like disease virus	Viruses;Varidnaviria;Bamfordvirae;Nucleocytoviricota;Pokkesviricetes;Chitovirales;Poxviridae;Chordopoxvirinae;Yatapoxvirus;Tanapoxvirus.	Poxviridae	dsDNA
TRINITY_DN686_c1_g2_i1	YP_758442.1	1771	30.02	503	310	18	95	1528	50	535	3.45e-51	187	egt [Leucania separata nucleopolyhedrovirus].	Leucania separata nucleopolyhedrovirus	Viruses;Naldaviricetes;Lefavirales;Baculoviridae;Alphabaculovirus;Alphabaculovirusleseparatae.	Baculoviridae	dsDNA
TRINITY_DN6212_c2_g1_i6	YP_009701904.1	4555	23.705	502	288	21	2671	4122	140	564	7.9e-07	57.8	ATPase [Paramecium bursaria Chlorella virus CVA-1].	Paramecium bursaria Chlorella virus CVA-1	Viruses;Varidnaviria;Bamfordvirae;Nucleocytoviricota;Megaviricetes;Algavirales;Phycodnaviridae;Chlorovirus;ParameciumbursariaChlorellavirusA1.	Phycodnaviridae	dsDNA
TRINITY_DN686_c1_g1_i1	YP_003986584.1	3005	26.494	502	284	22	1203	2615	21	468	4.71e-09	64.3	putative ankyrin repeat protein [Acanthamoeba polyphaga mimivirus].	Acanthamoeba polyphaga mimivirus	Viruses;Varidnaviria;Bamfordvirae;Nucleocytoviricota;Megaviricetes;Imitervirales;Mimiviridae;Megamimivirinae;Mimivirus;Mimivirusbradfordmassiliense.	Mimiviridae	dsDNA
TRINITY_DN3791_c0_g1_i31	YP_010841542.1	5878	33.134	501	223	12	2768	4087	23	472	1e-08	64.3	collagen-like protein [Cotonvirus japonicus].	Cotonvirus japonicus	Viruses;Varidnaviria;Bamfordvirae;Nucleocytoviricota;Megaviricetes;Imitervirales;Mimiviridae;Megamimivirinae;Cotonvirus;Cotonvirusjaponicum.	Mimiviridae	dsDNA
TRINITY_DN101638_c0_g1_i27	YP_010842284.1	1644	27.944	501	262	16	1631	228	117	551	4.36e-35	142	GMc oxidoreductase [Cotonvirus japonicus].	Cotonvirus japonicus	Viruses;Varidnaviria;Bamfordvirae;Nucleocytoviricota;Megaviricetes;Imitervirales;Mimiviridae;Megamimivirinae;Cotonvirus;Cotonvirusjaponicum.	Mimiviridae	dsDNA
TRINITY_DN12809_c0_g2_i17	YP_009001498.1	8008	24.649	499	313	17	5944	7401	339	787	4.34e-27	125	ABC transporter [Anomala cuprea entomopoxvirus].	Anomala cuprea entomopoxvirus	Viruses;Varidnaviria;Bamfordvirae;Nucleocytoviricota;Pokkesviricetes;Chitovirales;Poxviridae;Entomopoxvirinae;Alphaentomopoxvirus.	Poxviridae	dsDNA
TRINITY_DN39639_c0_g1_i2	YP_010788465.1	4952	30.461	499	241	23	4520	3156	1036	1472	0.093	41.2	collagen-like protein [Megavirus baoshan].	Megavirus baoshan	Viruses;Varidnaviria;Bamfordvirae;Nucleocytoviricota;Megaviricetes;Imitervirales;Mimiviridae;Megamimivirinae;Megavirus;Megavirusbaoshanense.	Mimiviridae	dsDNA
TRINITY_DN142_c0_g2_i1	YP_010796575.1	1929	27.655	499	323	12	206	1654	7	483	2.54e-60	213	EGT [Mythimna unipuncta nucleopolyhedrovirus].	Mythimna unipuncta nucleopolyhedrovirus	Viruses;Naldaviricetes;Lefavirales;Baculoviridae;Alphabaculovirus.	Baculoviridae	dsDNA
TRINITY_DN142_c0_g2_i2	YP_010796575.1	1929	27.856	499	322	12	206	1654	7	483	1.29e-60	213	EGT [Mythimna unipuncta nucleopolyhedrovirus].	Mythimna unipuncta nucleopolyhedrovirus	Viruses;Naldaviricetes;Lefavirales;Baculoviridae;Alphabaculovirus.	Baculoviridae	dsDNA
TRINITY_DN450_c0_g1_i38	YP_010796575.1	1929	27.655	499	323	12	206	1654	7	483	2.35e-59	210	EGT [Mythimna unipuncta nucleopolyhedrovirus].	Mythimna unipuncta nucleopolyhedrovirus	Viruses;Naldaviricetes;Lefavirales;Baculoviridae;Alphabaculovirus.	Baculoviridae	dsDNA
TRINITY_DN450_c0_g1_i12	YP_758442.1	1771	29.259	499	319	15	95	1528	50	535	6.85e-51	187	egt [Leucania separata nucleopolyhedrovirus].	Leucania separata nucleopolyhedrovirus	Viruses;Naldaviricetes;Lefavirales;Baculoviridae;Alphabaculovirus;Alphabaculovirusleseparatae.	Baculoviridae	dsDNA
TRINITY_DN450_c0_g1_i15	YP_758442.1	1718	26.052	499	325	13	1524	118	54	538	7e-42	161	egt [Leucania separata nucleopolyhedrovirus].	Leucania separata nucleopolyhedrovirus	Viruses;Naldaviricetes;Lefavirales;Baculoviridae;Alphabaculovirus;Alphabaculovirusleseparatae.	Baculoviridae	dsDNA
TRINITY_DN450_c0_g1_i13	YP_009325865.1	4635	23.494	498	289	21	3252	1831	133	562	3.82e-09	65.1	ATPase [Only Syngen Nebraska virus 5].	Only Syngen Nebraska virus 5	Viruses;Varidnaviria;Bamfordvirae;Nucleocytoviricota;Megaviricetes;Algavirales;Phycodnaviridae;Chlorovirus.	Phycodnaviridae	dsDNA
TRINITY_DN450_c0_g1_i7	YP_009001225.1	3701	29.116	498	278	13	379	1833	41	476	4.14e-56	210	ABC transporter [Pithovirus sibericum].	Pithovirus sibericum	Viruses;Pithoviruses;Pithovirus.	Pithovirus	dsDNA
TRINITY_DN46973_c0_g2_i3	YP_009448415.1	3190	29.518	498	268	17	3124	1760	14	471	3.27e-40	159	Glycyl-tRNA synthetase [Orpheovirus IHUMI-LCC2].	Orpheovirus IHUMI-LCC2	Viruses;Varidnaviria;Bamfordvirae;Nucleocytoviricota;Megaviricetes;Algavirales;Phycodnaviridae.	Phycodnaviridae	dsDNA
TRINITY_DN48797_c0_g1_i1	YP_009448415.1	3160	29.518	498	268	17	3094	1730	14	471	3.22e-40	159	Glycyl-tRNA synthetase [Orpheovirus IHUMI-LCC2].	Orpheovirus IHUMI-LCC2	Viruses;Varidnaviria;Bamfordvirae;Nucleocytoviricota;Megaviricetes;Algavirales;Phycodnaviridae.	Phycodnaviridae	dsDNA
TRINITY_DN39365_c3_g1_i1	YP_009448415.1	3056	29.518	498	268	17	2990	1626	14	471	3.04e-40	159	Glycyl-tRNA synthetase [Orpheovirus IHUMI-LCC2].	Orpheovirus IHUMI-LCC2	Viruses;Varidnaviria;Bamfordvirae;Nucleocytoviricota;Megaviricetes;Algavirales;Phycodnaviridae.	Phycodnaviridae	dsDNA
TRINITY_DN5561_c0_g3_i1	YP_010804160.1	2381	25.502	498	273	12	484	1779	61	526	2.1e-24	112	long-chain fatty acid CoA synthetase [Fadolivirusalgeromassiliense].	Fadolivirus algeromassiliense	Viruses;Varidnaviria;Bamfordvirae;Nucleocytoviricota;Megaviricetes;Imitervirales;Mimiviridae;Klosneuvirinae;Fadolivirus.	Mimiviridae	dsDNA
TRINITY_DN66784_c0_g2_i2	YP_758442.1	1754	27.711	498	330	11	1560	118	54	538	5.85e-52	189	egt [Leucania separata nucleopolyhedrovirus].	Leucania separata nucleopolyhedrovirus	Viruses;Naldaviricetes;Lefavirales;Baculoviridae;Alphabaculovirus;Alphabaculovirusleseparatae.	Baculoviridae	dsDNA
TRINITY_DN23_c0_g1_i5	YP_010796961.1	6913	38.431	497	260	15	2561	1137	598	1070	1.55e-79	273	PolB [Mayetiola barley midge adintovirus].	Mayetiola barley midge adintovirus	Viruses;Varidnaviria;Bamfordvirae;Preplasmiviricota;Polintoviricetes;Orthopolintovirales;Adintoviridae;Alphadintovirus;Alphadintovirusmayetiola.	Adintoviridae	dsDNA
TRINITY_DN23_c0_g1_i4	YP_010796961.1	6886	38.431	497	260	15	2561	1137	598	1070	1.55e-79	273	PolB [Mayetiola barley midge adintovirus].	Mayetiola barley midge adintovirus	Viruses;Varidnaviria;Bamfordvirae;Preplasmiviricota;Polintoviricetes;Orthopolintovirales;Adintoviridae;Alphadintovirus;Alphadintovirusmayetiola.	Adintoviridae	dsDNA
TRINITY_DN5508_c0_g1_i1	YP_010796961.1	6884	38.431	497	260	15	2561	1137	598	1070	1.55e-79	273	PolB [Mayetiola barley midge adintovirus].	Mayetiola barley midge adintovirus	Viruses;Varidnaviria;Bamfordvirae;Preplasmiviricota;Polintoviricetes;Orthopolintovirales;Adintoviridae;Alphadintovirus;Alphadintovirusmayetiola.	Adintoviridae	dsDNA
TRINITY_DN1163_c0_g1_i4	YP_010796961.1	6872	38.431	497	260	15	2561	1137	598	1070	1.54e-79	273	PolB [Mayetiola barley midge adintovirus].	Mayetiola barley midge adintovirus	Viruses;Varidnaviria;Bamfordvirae;Preplasmiviricota;Polintoviricetes;Orthopolintovirales;Adintoviridae;Alphadintovirus;Alphadintovirusmayetiola.	Adintoviridae	dsDNA
TRINITY_DN234991_c0_g1_i1	YP_009165054.1	2616	32.998	497	272	16	276	1640	2	479	1.06e-54	201	Amidophosphoribosyltransferase [Mollivirus sibericum].	Mollivirus sibericum	Viruses.	Viruses	unclassified viruses
TRINITY_DN3031_c0_g1_i8	YP_004061908.1	2799	37.223	497	280	13	495	1970	5	474	2.7e-86	288	hypothetical protein MpV1_025c [Micromonas sp. RCC1109 virus MpV1].	Micromonas sp. RCC1109 virus MpV1	Viruses;Varidnaviria;Bamfordvirae;Nucleocytoviricota;Megaviricetes;Algavirales;Phycodnaviridae;Prasinovirus.	Phycodnaviridae	dsDNA
TRINITY_DN3031_c0_g1_i1	YP_010803610.1	2481	28.169	497	306	16	587	2050	5	459	9.4e-47	177	deoxyribodipyrimidine photolyase [Fadolivirus algeromassiliense].	Fadolivirus algeromassiliense	Viruses;Varidnaviria;Bamfordvirae;Nucleocytoviricota;Megaviricetes;Imitervirales;Mimiviridae;Klosneuvirinae;Fadolivirus.	Mimiviridae	dsDNA
TRINITY_DN7142_c0_g1_i5	YP_010778125.1	2348	28.571	497	282	10	698	2161	6	438	3.9e-35	145	putative ATP-dependent RNA helicase [Bodo saltans virus].	Bodo saltans virus	Viruses;Varidnaviria;Bamfordvirae;Nucleocytoviricota;Megaviricetes;Imitervirales;Mimiviridae;Klosneuvirinae;Theiavirus;Theiavirussalishense.	Mimiviridae	dsDNA
TRINITY_DN7142_c0_g1_i12	YP_003986619.1	3094	25.806	496	270	19	1960	587	124	559	1.6e-20	100	putative GMC-type oxidoreductase [Acanthamoeba polyphagamimivirus].	Acanthamoeba polyphaga mimivirus	Viruses;Varidnaviria;Bamfordvirae;Nucleocytoviricota;Megaviricetes;Imitervirales;Mimiviridae;Megamimivirinae;Mimivirus;Mimivirusbradfordmassiliense.	Mimiviridae	dsDNA
TRINITY_DN1163_c0_g1_i2	YP_010803343.1	2056	34.073	496	283	11	327	1766	7	474	3.59e-77	258	inosine-5-monophosphate dehydrogenase [Fadolivirusalgeromassiliense].	Fadolivirus algeromassiliense	Viruses;Varidnaviria;Bamfordvirae;Nucleocytoviricota;Megaviricetes;Imitervirales;Mimiviridae;Klosneuvirinae;Fadolivirus.	Mimiviridae	dsDNA
TRINITY_DN3466_c0_g1_i18	YP_010803343.1	2041	34.073	496	283	11	327	1766	7	474	3.23e-77	258	inosine-5-monophosphate dehydrogenase [Fadolivirusalgeromassiliense].	Fadolivirus algeromassiliense	Viruses;Varidnaviria;Bamfordvirae;Nucleocytoviricota;Megaviricetes;Imitervirales;Mimiviridae;Klosneuvirinae;Fadolivirus.	Mimiviridae	dsDNA
TRINITY_DN6670_c0_g1_i8	YP_009448636.1	1911	26.613	496	288	19	213	1640	19	458	2.12e-22	104	Cytochrome P450-like protein E-class [Orpheovirus IHUMI-LCC2].	Orpheovirus IHUMI-LCC2	Viruses;Varidnaviria;Bamfordvirae;Nucleocytoviricota;Megaviricetes;Algavirales;Phycodnaviridae.	Phycodnaviridae	dsDNA
TRINITY_DN140734_c0_g1_i7	YP_010803998.1	1718	32.056	496	282	17	1598	171	16	476	2.26e-66	228	methionyl-tRNA synthetase [Fadolivirus algeromassiliense].	Fadolivirus algeromassiliense	Viruses;Varidnaviria;Bamfordvirae;Nucleocytoviricota;Megaviricetes;Imitervirales;Mimiviridae;Klosneuvirinae;Fadolivirus.	Mimiviridae	dsDNA
TRINITY_DN5638_c0_g1_i1	YP_004061438.1	4552	72.267	494	131	1	2679	4160	118	605	0	675	hypothetical protein BpV1_008c [Bathycoccus sp. RCC1105 virusBpV1].	Bathycoccus sp. RCC1105 virus BpV1	Viruses;Varidnaviria;Bamfordvirae;Nucleocytoviricota;Megaviricetes;Algavirales;Phycodnaviridae;Prasinovirus;Bathycoccussp.RCC1105virusBpV.	Phycodnaviridae	dsDNA
TRINITY_DN6389_c0_g1_i1	YP_004061438.1	4019	72.267	494	131	1	2146	3627	118	605	0	675	hypothetical protein BpV1_008c [Bathycoccus sp. RCC1105 virusBpV1].	Bathycoccus sp. RCC1105 virus BpV1	Viruses;Varidnaviria;Bamfordvirae;Nucleocytoviricota;Megaviricetes;Algavirales;Phycodnaviridae;Prasinovirus;Bathycoccussp.RCC1105virusBpV.	Phycodnaviridae	dsDNA
TRINITY_DN6389_c0_g1_i2	YP_010788696.1	2614	31.984	494	308	12	232	1668	28	508	2.91e-69	246	ATP-dependent RNA helicase [Megavirus baoshan].	Megavirus baoshan	Viruses;Varidnaviria;Bamfordvirae;Nucleocytoviricota;Megaviricetes;Imitervirales;Mimiviridae;Megamimivirinae;Megavirus;Megavirusbaoshanense.	Mimiviridae	dsDNA
TRINITY_DN629_c1_g1_i2	YP_010788696.1	2102	31.984	494	308	12	232	1668	28	508	1.46e-70	246	ATP-dependent RNA helicase [Megavirus baoshan].	Megavirus baoshan	Viruses;Varidnaviria;Bamfordvirae;Nucleocytoviricota;Megaviricetes;Imitervirales;Mimiviridae;Megamimivirinae;Megavirus;Megavirusbaoshanense.	Mimiviridae	dsDNA
TRINITY_DN31984_c0_g1_i3	YP_010780309.1	1802	27.935	494	288	16	1521	88	1037	1478	4.25e-34	142	NcpA [Tupanvirus deep ocean].	Tupanvirus deep ocean	Viruses;Varidnaviria;Bamfordvirae;Nucleocytoviricota;Megaviricetes;Imitervirales;Mimiviridae;Megamimivirinae;Tupanvirus.	Mimiviridae	dsDNA
TRINITY_DN3031_c0_g1_i9	YP_009046239.1	2632	28.803	493	273	12	1719	250	19	436	1.31e-32	138	ankyrin repeat protein [Penguinpox virus].	Penguinpox virus	Viruses;Varidnaviria;Bamfordvirae;Nucleocytoviricota;Pokkesviricetes;Chitovirales;Poxviridae;Chordopoxvirinae;Avipoxvirus.	Poxviridae	dsDNA
TRINITY_DN55970_c0_g1_i6	YP_004956771.1	2130	27.181	493	312	11	1897	428	8	456	3.62e-39	155	orf23 gene product [Helicoverpa zea nudivirus 2].	Helicoverpa zea nudivirus 2	Viruses;Naldaviricetes;Lefavirales;Nudiviridae;Betanudivirus;Betanudivirushezeae.	Nudiviridae	dsDNA
TRINITY_DN4658_c0_g1_i6	YP_010804160.1	2018	24.138	493	275	15	510	1799	47	503	3.32e-19	95.5	long-chain fatty acid CoA synthetase [Fadolivirusalgeromassiliense].	Fadolivirus algeromassiliense	Viruses;Varidnaviria;Bamfordvirae;Nucleocytoviricota;Megaviricetes;Imitervirales;Mimiviridae;Klosneuvirinae;Fadolivirus.	Mimiviridae	dsDNA
TRINITY_DN8104_c0_g2_i3	YP_009001225.1	1977	29.615	493	281	11	404	1843	72	511	3.34e-50	187	ABC transporter [Pithovirus sibericum].	Pithovirus sibericum	Viruses;Pithoviruses;Pithovirus.	Pithovirus	dsDNA
TRINITY_DN1195_c0_g1_i2	YP_004956771.1	1890	27.181	493	312	11	1657	188	8	456	1.74e-39	155	orf23 gene product [Helicoverpa zea nudivirus 2].	Helicoverpa zea nudivirus 2	Viruses;Naldaviricetes;Lefavirales;Nudiviridae;Betanudivirus;Betanudivirushezeae.	Nudiviridae	dsDNA
TRINITY_DN101638_c0_g1_i4	YP_010803569.1	1836	34.686	493	281	18	288	1700	21	494	7.42e-76	253	cysteinyl-tRNA synthetase [Fadolivirus algeromassiliense].	Fadolivirus algeromassiliense	Viruses;Varidnaviria;Bamfordvirae;Nucleocytoviricota;Megaviricetes;Imitervirales;Mimiviridae;Klosneuvirinae;Fadolivirus.	Mimiviridae	dsDNA
TRINITY_DN1438_c1_g1_i7	YP_010780181.1	4459	35.569	492	270	15	4177	2729	116	569	6.63e-73	265	hypothetical protein QJ856_gp1184 [Tupanvirus deep ocean].	Tupanvirus deep ocean	Viruses;Varidnaviria;Bamfordvirae;Nucleocytoviricota;Megaviricetes;Imitervirales;Mimiviridae;Megamimivirinae;Tupanvirus.	Mimiviridae	dsDNA
TRINITY_DN193594_c0_g2_i2	YP_010801995.1	1778	35.438	491	260	15	233	1648	5	457	2.48e-79	260	beta-galactosidase [Acanthamoeba castellanii medusavirus].	Acanthamoeba castellanii medusavirus	Viruses.	Viruses	unclassified viruses
TRINITY_DN686_c1_g1_i4	NP_570746.1	4422	24.847	491	302	18	3776	2367	2	446	7.75e-24	112	complement binding protein [Macacine gammaherpesvirus 5].	Macacine gammaherpesvirus 5	Viruses;Duplodnaviria;Heunggongvirae;Peploviricota;Herviviricetes;Herpesvirales;Orthoherpesviridae;Gammaherpesvirinae;Rhadinovirus;Rhadinovirusmacacinegamma5.	Orthoherpesviridae	dsDNA
TRINITY_DN21163_c0_g1_i21	NP_570746.1	4354	24.847	491	302	18	3708	2299	2	446	7.59e-24	112	complement binding protein [Macacine gammaherpesvirus 5].	Macacine gammaherpesvirus 5	Viruses;Duplodnaviria;Heunggongvirae;Peploviricota;Herviviricetes;Herpesvirales;Orthoherpesviridae;Gammaherpesvirinae;Rhadinovirus;Rhadinovirusmacacinegamma5.	Orthoherpesviridae	dsDNA
TRINITY_DN21163_c0_g1_i31	YP_010777733.1	4298	25.458	491	310	18	2300	933	779	1248	5.01e-28	127	putative serinethreonine-protein kinasereceptor [Acanthamoebapolyphaga mimivirus].	Acanthamoeba polyphaga mimivirus	Viruses;Varidnaviria;Bamfordvirae;Nucleocytoviricota;Megaviricetes;Imitervirales;Mimiviridae;Megamimivirinae;Mimivirus;Mimivirusbradfordmassiliense.	Mimiviridae	dsDNA
TRINITY_DN7563_c0_g1_i3	YP_010777733.1	2913	25.051	491	312	18	2300	933	779	1248	2.87e-28	127	putative serinethreonine-protein kinasereceptor [Acanthamoebapolyphaga mimivirus].	Acanthamoeba polyphaga mimivirus	Viruses;Varidnaviria;Bamfordvirae;Nucleocytoviricota;Megaviricetes;Imitervirales;Mimiviridae;Megamimivirinae;Mimivirus;Mimivirusbradfordmassiliense.	Mimiviridae	dsDNA
TRINITY_DN7563_c0_g1_i8	YP_010796575.1	1926	26.68	491	337	11	206	1651	7	483	2.19e-53	194	EGT [Mythimna unipuncta nucleopolyhedrovirus].	Mythimna unipuncta nucleopolyhedrovirus	Viruses;Naldaviricetes;Lefavirales;Baculoviridae;Alphabaculovirus.	Baculoviridae	dsDNA
TRINITY_DN3198_c0_g1_i6	YP_758442.1	1795	27.291	491	339	9	1557	118	55	538	5.34e-52	190	egt [Leucania separata nucleopolyhedrovirus].	Leucania separata nucleopolyhedrovirus	Viruses;Naldaviricetes;Lefavirales;Baculoviridae;Alphabaculovirus;Alphabaculovirusleseparatae.	Baculoviridae	dsDNA
TRINITY_DN3198_c0_g1_i15	YP_611073.1	12497	28.221	489	298	16	3663	5078	20	472	4.46e-35	146	global transactivator [Antheraea pernyi nucleopolyhedrovirus].	Antheraea pernyi nucleopolyhedrovirus	Viruses;Naldaviricetes;Lefavirales;Baculoviridae;Alphabaculovirus;Alphabaculovirusanpernyi.	Baculoviridae	dsDNA
TRINITY_DN3198_c0_g1_i24	YP_611073.1	6649	28.221	489	298	16	3663	5078	20	472	2.16e-35	146	global transactivator [Antheraea pernyi nucleopolyhedrovirus].	Antheraea pernyi nucleopolyhedrovirus	Viruses;Naldaviricetes;Lefavirales;Baculoviridae;Alphabaculovirus;Alphabaculovirusanpernyi.	Baculoviridae	dsDNA
TRINITY_DN3198_c0_g1_i10	NP_570746.1	6053	23.108	489	301	19	1673	288	66	506	1.96e-18	95.5	complement binding protein [Macacine gammaherpesvirus 5].	Macacine gammaherpesvirus 5	Viruses;Duplodnaviria;Heunggongvirae;Peploviricota;Herviviricetes;Herpesvirales;Orthoherpesviridae;Gammaherpesvirinae;Rhadinovirus;Rhadinovirusmacacinegamma5.	Orthoherpesviridae	dsDNA
TRINITY_DN42061_c0_g1_i7	YP_611073.1	5798	28.221	489	298	16	3663	5078	20	472	1.2e-35	147	global transactivator [Antheraea pernyi nucleopolyhedrovirus].	Antheraea pernyi nucleopolyhedrovirus	Viruses;Naldaviricetes;Lefavirales;Baculoviridae;Alphabaculovirus;Alphabaculovirusanpernyi.	Baculoviridae	dsDNA
TRINITY_DN3427_c0_g1_i27	NP_570746.1	5794	23.108	489	301	19	1673	288	66	506	1.86e-18	95.5	complement binding protein [Macacine gammaherpesvirus 5].	Macacine gammaherpesvirus 5	Viruses;Duplodnaviria;Heunggongvirae;Peploviricota;Herviviricetes;Herpesvirales;Orthoherpesviridae;Gammaherpesvirinae;Rhadinovirus;Rhadinovirusmacacinegamma5.	Orthoherpesviridae	dsDNA
TRINITY_DN3427_c0_g1_i19	YP_010803146.1	4384	34.151	489	295	15	1794	3224	5	478	7.62e-72	252	polyADP-ribose polymerase with WGR domain [Fadolivirusalgeromassiliense].	Fadolivirus algeromassiliense	Viruses;Varidnaviria;Bamfordvirae;Nucleocytoviricota;Megaviricetes;Imitervirales;Mimiviridae;Klosneuvirinae;Fadolivirus.	Mimiviridae	dsDNA
TRINITY_DN3941_c0_g1_i2	YP_010803146.1	4262	34.151	489	295	15	1672	3102	5	478	7.15e-72	252	polyADP-ribose polymerase with WGR domain [Fadolivirusalgeromassiliense].	Fadolivirus algeromassiliense	Viruses;Varidnaviria;Bamfordvirae;Nucleocytoviricota;Megaviricetes;Imitervirales;Mimiviridae;Klosneuvirinae;Fadolivirus.	Mimiviridae	dsDNA
TRINITY_DN10470_c2_g2_i1	YP_010803146.1	3823	34.151	489	295	15	1233	2663	5	478	4.85e-72	252	polyADP-ribose polymerase with WGR domain [Fadolivirusalgeromassiliense].	Fadolivirus algeromassiliense	Viruses;Varidnaviria;Bamfordvirae;Nucleocytoviricota;Megaviricetes;Imitervirales;Mimiviridae;Klosneuvirinae;Fadolivirus.	Mimiviridae	dsDNA
TRINITY_DN7311_c0_g1_i21	YP_611073.1	3464	28.221	489	298	16	1329	2744	20	472	5.94e-36	147	global transactivator [Antheraea pernyi nucleopolyhedrovirus].	Antheraea pernyi nucleopolyhedrovirus	Viruses;Naldaviricetes;Lefavirales;Baculoviridae;Alphabaculovirus;Alphabaculovirusanpernyi.	Baculoviridae	dsDNA
TRINITY_DN22162_c0_g1_i1	YP_611073.1	2586	28.221	489	298	16	451	1866	20	472	3.97e-36	146	global transactivator [Antheraea pernyi nucleopolyhedrovirus].	Antheraea pernyi nucleopolyhedrovirus	Viruses;Naldaviricetes;Lefavirales;Baculoviridae;Alphabaculovirus;Alphabaculovirusanpernyi.	Baculoviridae	dsDNA
TRINITY_DN25381_c0_g1_i1	YP_009046239.1	1731	28.016	489	260	12	1469	15	19	419	2.91e-29	125	ankyrin repeat protein [Penguinpox virus].	Penguinpox virus	Viruses;Varidnaviria;Bamfordvirae;Nucleocytoviricota;Pokkesviricetes;Chitovirales;Poxviridae;Chordopoxvirinae;Avipoxvirus.	Poxviridae	dsDNA
TRINITY_DN8899_c0_g2_i22	YP_010841253.1	3627	29.508	488	293	16	2843	1380	91	527	4.87e-52	195	putative ankyrin repeat protein [Cotonvirus japonicus].	Cotonvirus japonicus	Viruses;Varidnaviria;Bamfordvirae;Nucleocytoviricota;Megaviricetes;Imitervirales;Mimiviridae;Megamimivirinae;Cotonvirus;Cotonvirusjaponicum.	Mimiviridae	dsDNA
TRINITY_DN8899_c0_g2_i3	YP_010841253.1	3588	29.508	488	293	16	2804	1341	91	527	4.78e-52	195	putative ankyrin repeat protein [Cotonvirus japonicus].	Cotonvirus japonicus	Viruses;Varidnaviria;Bamfordvirae;Nucleocytoviricota;Megaviricetes;Imitervirales;Mimiviridae;Megamimivirinae;Cotonvirus;Cotonvirusjaponicum.	Mimiviridae	dsDNA
TRINITY_DN25810_c1_g1_i4	YP_009177124.1	3195	22.951	488	268	16	2102	930	87	563	5.93e-11	70.5	ankyrin repeat family protein [Turkeypox virus].	Turkeypox virus	Viruses;Varidnaviria;Bamfordvirae;Nucleocytoviricota;Pokkesviricetes;Chitovirales;Poxviridae;Chordopoxvirinae;Avipoxvirus.	Poxviridae	dsDNA
TRINITY_DN2020_c1_g1_i5	YP_010841253.1	3175	29.508	488	293	16	2391	928	91	527	3.56e-52	195	putative ankyrin repeat protein [Cotonvirus japonicus].	Cotonvirus japonicus	Viruses;Varidnaviria;Bamfordvirae;Nucleocytoviricota;Megaviricetes;Imitervirales;Mimiviridae;Megamimivirinae;Cotonvirus;Cotonvirusjaponicum.	Mimiviridae	dsDNA
TRINITY_DN7727_c0_g1_i21	YP_009448185.1	2003	22.951	488	254	21	1661	273	1381	1771	6.47e-05	50.1	ORF2 [Dianke virus].	Dianke virus	Viruses;Riboviria;Orthornavirae;Pisuviricota;Pisoniviricetes;Nidovirales;Mesnidovirineae;Mesoniviridae;Hexponivirinae;Alphamesonivirus;Namcalivirus;Alphamesonivirus10.	Mesoniviridae	ssRNA(+)
TRINITY_DN5625_c0_g1_i3	YP_009701780.1	7080	35.934	487	274	6	898	2355	13	462	1.11e-83	295	Holliday junction branch migration helicase [Paramecium bursariaChlorella virus CVA-1].	Paramecium bursaria Chlorella virus CVA-1	Viruses;Varidnaviria;Bamfordvirae;Nucleocytoviricota;Megaviricetes;Algavirales;Phycodnaviridae;Chlorovirus;ParameciumbursariaChlorellavirusA1.	Phycodnaviridae	dsDNA
TRINITY_DN41694_c0_g1_i3	YP_003970015.1	2261	37.782	487	234	8	1743	319	23	452	4.9e-97	320	Holliday junction branch migration helicase [Cafeteriaroenbergensis virus BV-PW1].	Cafeteria roenbergensis virus BV-PW1	Viruses;Varidnaviria;Bamfordvirae;Nucleocytoviricota;Megaviricetes;Imitervirales;Mimiviridae;Aliimimivirinae;Rheavirus;Rheavirussinusmexicani.	Mimiviridae	dsDNA
TRINITY_DN156_c0_g2_i1	NP_073525.1	1865	23.614	487	331	12	339	1757	50	509	2.37e-29	126	140R protein [Yaba-like disease virus].	Yaba-like disease virus	Viruses;Varidnaviria;Bamfordvirae;Nucleocytoviricota;Pokkesviricetes;Chitovirales;Poxviridae;Chordopoxvirinae;Yatapoxvirus;Tanapoxvirus.	Poxviridae	dsDNA
TRINITY_DN156_c0_g2_i2	YP_010780309.1	2798	25.309	486	298	17	2410	977	135	563	2.08e-26	120	NcpA [Tupanvirus deep ocean].	Tupanvirus deep ocean	Viruses;Varidnaviria;Bamfordvirae;Nucleocytoviricota;Megaviricetes;Imitervirales;Mimiviridae;Megamimivirinae;Tupanvirus.	Mimiviridae	dsDNA
TRINITY_DN214450_c0_g1_i3	YP_758442.1	2527	28.189	486	313	14	683	2089	55	521	9.6e-57	207	egt [Leucania separata nucleopolyhedrovirus].	Leucania separata nucleopolyhedrovirus	Viruses;Naldaviricetes;Lefavirales;Baculoviridae;Alphabaculovirus;Alphabaculovirusleseparatae.	Baculoviridae	dsDNA
TRINITY_DN48589_c0_g1_i13	YP_010841796.1	3687	29.485	485	298	13	3002	1548	91	531	6.39e-55	204	putative ankyrin repeat protein [Cotonvirus japonicus].	Cotonvirus japonicus	Viruses;Varidnaviria;Bamfordvirae;Nucleocytoviricota;Megaviricetes;Imitervirales;Mimiviridae;Megamimivirinae;Cotonvirus;Cotonvirusjaponicum.	Mimiviridae	dsDNA
TRINITY_DN86973_c1_g1_i9	YP_004956816.1	2360	31.134	485	256	24	1765	476	245	706	6.93e-38	155	orf68 gene product [Helicoverpa zea nudivirus 2].	Helicoverpa zea nudivirus 2	Viruses;Naldaviricetes;Lefavirales;Nudiviridae;Betanudivirus;Betanudivirushezeae.	Nudiviridae	dsDNA
TRINITY_DN86973_c1_g1_i6	YP_004956816.1	2342	31.134	485	256	24	1747	458	245	706	4.15e-38	155	orf68 gene product [Helicoverpa zea nudivirus 2].	Helicoverpa zea nudivirus 2	Viruses;Naldaviricetes;Lefavirales;Nudiviridae;Betanudivirus;Betanudivirushezeae.	Nudiviridae	dsDNA
TRINITY_DN6413_c0_g1_i10	YP_004956816.1	2338	31.134	485	256	24	1743	454	245	706	5.91e-38	155	orf68 gene product [Helicoverpa zea nudivirus 2].	Helicoverpa zea nudivirus 2	Viruses;Naldaviricetes;Lefavirales;Nudiviridae;Betanudivirus;Betanudivirushezeae.	Nudiviridae	dsDNA
TRINITY_DN46973_c0_g2_i2	YP_004956816.1	2219	31.134	485	256	24	1624	335	245	706	6.06e-38	155	orf68 gene product [Helicoverpa zea nudivirus 2].	Helicoverpa zea nudivirus 2	Viruses;Naldaviricetes;Lefavirales;Nudiviridae;Betanudivirus;Betanudivirushezeae.	Nudiviridae	dsDNA
TRINITY_DN45274_c0_g1_i4	YP_004956816.1	2201	31.134	485	256	24	1606	317	245	706	5.11e-38	155	orf68 gene product [Helicoverpa zea nudivirus 2].	Helicoverpa zea nudivirus 2	Viruses;Naldaviricetes;Lefavirales;Nudiviridae;Betanudivirus;Betanudivirushezeae.	Nudiviridae	dsDNA
TRINITY_DN12809_c0_g2_i3	YP_004956816.1	2154	31.134	485	256	24	1559	270	245	706	4.2e-38	155	orf68 gene product [Helicoverpa zea nudivirus 2].	Helicoverpa zea nudivirus 2	Viruses;Naldaviricetes;Lefavirales;Nudiviridae;Betanudivirus;Betanudivirushezeae.	Nudiviridae	dsDNA
TRINITY_DN23357_c0_g1_i2	YP_010781174.1	2090	31.34	485	283	15	1971	550	9	454	1e-65	227	hypothetical protein QJ856_gp0191 [Tupanvirus deep ocean].	Tupanvirus deep ocean	Viruses;Varidnaviria;Bamfordvirae;Nucleocytoviricota;Megaviricetes;Imitervirales;Mimiviridae;Megamimivirinae;Tupanvirus.	Mimiviridae	dsDNA
TRINITY_DN6595_c0_g1_i1	YP_009481512.1	1997	24.536	485	285	21	185	1513	66	511	1.72e-24	111	Carboxylic ester hydrolase [Pandoravirus macleodensis].	Pandoravirus macleodensis	Viruses;Pandoravirus.	Pandoravirus	dsDNA
TRINITY_DN5429_c0_g1_i10	YP_010796575.1	1749	29.072	485	312	10	1641	235	13	481	1.19e-57	204	EGT [Mythimna unipuncta nucleopolyhedrovirus].	Mythimna unipuncta nucleopolyhedrovirus	Viruses;Naldaviricetes;Lefavirales;Baculoviridae;Alphabaculovirus.	Baculoviridae	dsDNA
TRINITY_DN3675_c0_g1_i6	NP_570746.1	1724	22.887	485	277	22	1556	297	110	562	1.33e-15	83.6	complement binding protein [Macacine gammaherpesvirus 5].	Macacine gammaherpesvirus 5	Viruses;Duplodnaviria;Heunggongvirae;Peploviricota;Herviviricetes;Herpesvirales;Orthoherpesviridae;Gammaherpesvirinae;Rhadinovirus;Rhadinovirusmacacinegamma5.	Orthoherpesviridae	dsDNA
TRINITY_DN5880_c0_g1_i3	YP_009046239.1	2632	25.413	484	268	11	2436	1000	31	426	7.87e-27	120	ankyrin repeat protein [Penguinpox virus].	Penguinpox virus	Viruses;Varidnaviria;Bamfordvirae;Nucleocytoviricota;Pokkesviricetes;Chitovirales;Poxviridae;Chordopoxvirinae;Avipoxvirus.	Poxviridae	dsDNA
TRINITY_DN3697_c0_g1_i23	YP_010796575.1	2060	28.719	484	305	10	1865	474	16	479	4.83e-61	216	EGT [Mythimna unipuncta nucleopolyhedrovirus].	Mythimna unipuncta nucleopolyhedrovirus	Viruses;Naldaviricetes;Lefavirales;Baculoviridae;Alphabaculovirus.	Baculoviridae	dsDNA
TRINITY_DN963_c0_g3_i3	YP_009325865.1	2306	31.056	483	254	20	670	2037	114	544	1.76e-39	160	ATPase [Only Syngen Nebraska virus 5].	Only Syngen Nebraska virus 5	Viruses;Varidnaviria;Bamfordvirae;Nucleocytoviricota;Megaviricetes;Algavirales;Phycodnaviridae;Chlorovirus.	Phycodnaviridae	dsDNA
TRINITY_DN40691_c1_g1_i3	YP_009001225.1	2082	27.536	483	307	15	230	1636	111	564	5.4e-41	162	ABC transporter [Pithovirus sibericum].	Pithovirus sibericum	Viruses;Pithoviruses;Pithovirus.	Pithovirus	dsDNA
TRINITY_DN384653_c0_g1_i1	YP_010789287.1	1790	31.056	483	283	17	64	1374	63	541	1.81e-39	156	ankyrin repeat protein [Megavirus baoshan].	Megavirus baoshan	Viruses;Varidnaviria;Bamfordvirae;Nucleocytoviricota;Megaviricetes;Imitervirales;Mimiviridae;Megamimivirinae;Megavirus;Megavirusbaoshanense.	Mimiviridae	dsDNA
TRINITY_DN60771_c0_g1_i3	YP_758442.1	2217	29.668	482	317	10	587	2005	49	517	5.45e-58	209	egt [Leucania separata nucleopolyhedrovirus].	Leucania separata nucleopolyhedrovirus	Viruses;Naldaviricetes;Lefavirales;Baculoviridae;Alphabaculovirus;Alphabaculovirusleseparatae.	Baculoviridae	dsDNA
TRINITY_DN10214_c0_g1_i3	YP_010796575.1	2375	29.106	481	319	11	305	1714	7	476	1.56e-56	205	EGT [Mythimna unipuncta nucleopolyhedrovirus].	Mythimna unipuncta nucleopolyhedrovirus	Viruses;Naldaviricetes;Lefavirales;Baculoviridae;Alphabaculovirus.	Baculoviridae	dsDNA
TRINITY_DN7247_c0_g1_i8	YP_010796575.1	2210	29.106	481	319	11	140	1549	7	476	5.89e-57	205	EGT [Mythimna unipuncta nucleopolyhedrovirus].	Mythimna unipuncta nucleopolyhedrovirus	Viruses;Naldaviricetes;Lefavirales;Baculoviridae;Alphabaculovirus.	Baculoviridae	dsDNA
TRINITY_DN9205_c1_g1_i6	YP_003986584.1	6218	26.042	480	281	15	692	1939	300	769	5.15e-23	110	putative ankyrin repeat protein [Acanthamoeba polyphaga mimivirus].	Acanthamoeba polyphaga mimivirus	Viruses;Varidnaviria;Bamfordvirae;Nucleocytoviricota;Megaviricetes;Imitervirales;Mimiviridae;Megamimivirinae;Mimivirus;Mimivirusbradfordmassiliense.	Mimiviridae	dsDNA
TRINITY_DN894_c0_g1_i1	YP_003986584.1	5937	26.042	480	281	15	411	1658	300	769	5.1e-23	110	putative ankyrin repeat protein [Acanthamoeba polyphaga mimivirus].	Acanthamoeba polyphaga mimivirus	Viruses;Varidnaviria;Bamfordvirae;Nucleocytoviricota;Megaviricetes;Imitervirales;Mimiviridae;Megamimivirinae;Mimivirus;Mimivirusbradfordmassiliense.	Mimiviridae	dsDNA
TRINITY_DN111470_c0_g1_i5	YP_003986584.1	5879	26.042	480	281	15	353	1600	300	769	4.79e-23	110	putative ankyrin repeat protein [Acanthamoeba polyphaga mimivirus].	Acanthamoeba polyphaga mimivirus	Viruses;Varidnaviria;Bamfordvirae;Nucleocytoviricota;Megaviricetes;Imitervirales;Mimiviridae;Megamimivirinae;Mimivirus;Mimivirusbradfordmassiliense.	Mimiviridae	dsDNA
TRINITY_DN10214_c0_g1_i7	YP_003986584.1	5817	26.042	480	281	15	246	1493	300	769	4.72e-23	110	putative ankyrin repeat protein [Acanthamoeba polyphaga mimivirus].	Acanthamoeba polyphaga mimivirus	Viruses;Varidnaviria;Bamfordvirae;Nucleocytoviricota;Megaviricetes;Imitervirales;Mimiviridae;Megamimivirinae;Mimivirus;Mimivirusbradfordmassiliense.	Mimiviridae	dsDNA
TRINITY_DN19775_c0_g1_i11	YP_003986584.1	3298	26.042	480	281	15	246	1493	300	769	2.02e-23	110	putative ankyrin repeat protein [Acanthamoeba polyphaga mimivirus].	Acanthamoeba polyphaga mimivirus	Viruses;Varidnaviria;Bamfordvirae;Nucleocytoviricota;Megaviricetes;Imitervirales;Mimiviridae;Megamimivirinae;Mimivirus;Mimivirusbradfordmassiliense.	Mimiviridae	dsDNA
TRINITY_DN32938_c0_g1_i1	YP_010781535.1	3123	37.917	480	231	12	2735	1389	11	454	6.38e-91	301	alanyl-tRNA synthetase [Tupanvirus soda lake].	Tupanvirus soda lake	Viruses;Varidnaviria;Bamfordvirae;Nucleocytoviricota;Megaviricetes;Imitervirales;Mimiviridae;Megamimivirinae;Tupanvirus.	Mimiviridae	dsDNA
TRINITY_DN1195_c1_g1_i2	YP_009046239.1	2427	31.875	480	249	7	1899	466	38	441	3.2e-43	169	ankyrin repeat protein [Penguinpox virus].	Penguinpox virus	Viruses;Varidnaviria;Bamfordvirae;Nucleocytoviricota;Pokkesviricetes;Chitovirales;Poxviridae;Chordopoxvirinae;Avipoxvirus.	Poxviridae	dsDNA
TRINITY_DN7656_c0_g1_i8	YP_010778630.1	3557	32.985	479	272	6	3021	1621	27	468	1.92e-75	270	DEXDc helicase [Bodo saltans virus].	Bodo saltans virus	Viruses;Varidnaviria;Bamfordvirae;Nucleocytoviricota;Megaviricetes;Imitervirales;Mimiviridae;Klosneuvirinae;Theiavirus;Theiavirussalishense.	Mimiviridae	dsDNA
TRINITY_DN21093_c0_g1_i21	YP_009448811.1	2350	45.397	478	221	9	1927	515	5	449	5.48e-118	367	Serine-tRNA synthetase, type1 [Orpheovirus IHUMI-LCC2].	Orpheovirus IHUMI-LCC2	Viruses;Varidnaviria;Bamfordvirae;Nucleocytoviricota;Megaviricetes;Algavirales;Phycodnaviridae.	Phycodnaviridae	dsDNA
TRINITY_DN378962_c0_g1_i1	YP_010803532.1	2234	22.176	478	305	14	539	1786	312	784	6.9e-20	98.2	eukaryotic translation elongation factor 2 [Fadolivirusalgeromassiliense].	Fadolivirus algeromassiliense	Viruses;Varidnaviria;Bamfordvirae;Nucleocytoviricota;Megaviricetes;Imitervirales;Mimiviridae;Klosneuvirinae;Fadolivirus.	Mimiviridae	dsDNA
TRINITY_DN6595_c0_g1_i4	YP_009417301.1	6128	38.365	477	253	14	2359	965	176	623	4.51e-71	259	RdRp [Australian Anopheles totivirus].	Australian Anopheles totivirus	Viruses;Riboviria;Orthornavirae;Duplornaviricota;Chrymotiviricetes;Ghabrivirales;Totiviridae.	Totiviridae	dsRNA
TRINITY_DN4658_c0_g1_i16	YP_009417301.1	6121	38.365	477	253	14	2359	965	176	623	4.5e-71	259	RdRp [Australian Anopheles totivirus].	Australian Anopheles totivirus	Viruses;Riboviria;Orthornavirae;Duplornaviricota;Chrymotiviricetes;Ghabrivirales;Totiviridae.	Totiviridae	dsRNA
TRINITY_DN43369_c0_g2_i1	YP_009344999.1	4512	35.849	477	278	11	1225	2634	41	496	4.72e-78	273	hypothetical protein 2 [Wuhan spider virus 9].	Wuhan spider virus 9	Viruses;Riboviria.	Riboviria	unclassified Riboviria
TRINITY_DN3184_c1_g1_i17	YP_009046239.1	2475	28.721	477	309	14	2019	628	20	478	1.85e-31	134	ankyrin repeat protein [Penguinpox virus].	Penguinpox virus	Viruses;Varidnaviria;Bamfordvirae;Nucleocytoviricota;Pokkesviricetes;Chitovirales;Poxviridae;Chordopoxvirinae;Avipoxvirus.	Poxviridae	dsDNA
TRINITY_DN27054_c0_g1_i49	YP_010780082.1	2337	37.107	477	266	7	72	1412	17	489	1.9e-83	277	asparaginyl t-RNA synthetase [Tupanvirus deep ocean].	Tupanvirus deep ocean	Viruses;Varidnaviria;Bamfordvirae;Nucleocytoviricota;Megaviricetes;Imitervirales;Mimiviridae;Megamimivirinae;Tupanvirus.	Mimiviridae	dsDNA
TRINITY_DN10858_c0_g1_i6	YP_010796784.1	2298	25.367	477	271	17	412	1815	25	425	5.43e-26	115	putative gamma-glutamyl transpeptidase [Diachasmimorphalongicaudata entomopoxvirus].	Diachasmimorpha longicaudata entomopoxvirus	Viruses;Varidnaviria;Bamfordvirae;Nucleocytoviricota;Pokkesviricetes;Chitovirales;Poxviridae;Entomopoxvirinae;Diachasmimorphaentomopoxvirus.	Poxviridae	dsDNA
TRINITY_DN10858_c0_g1_i15	YP_010796784.1	2033	25.367	477	271	17	412	1815	25	425	4.99e-26	115	putative gamma-glutamyl transpeptidase [Diachasmimorphalongicaudata entomopoxvirus].	Diachasmimorpha longicaudata entomopoxvirus	Viruses;Varidnaviria;Bamfordvirae;Nucleocytoviricota;Pokkesviricetes;Chitovirales;Poxviridae;Entomopoxvirinae;Diachasmimorphaentomopoxvirus.	Poxviridae	dsDNA
TRINITY_DN10858_c0_g1_i14	YP_010801995.1	2568	36.134	476	252	15	677	2044	9	452	1.24e-78	265	beta-galactosidase [Acanthamoeba castellanii medusavirus].	Acanthamoeba castellanii medusavirus	Viruses.	Viruses	unclassified viruses
TRINITY_DN79842_c0_g1_i5	YP_010801995.1	2226	36.134	476	252	15	335	1702	9	452	2.3e-79	264	beta-galactosidase [Acanthamoeba castellanii medusavirus].	Acanthamoeba castellanii medusavirus	Viruses.	Viruses	unclassified viruses
TRINITY_DN83330_c0_g2_i9	YP_009046239.1	3097	28.782	476	310	13	2019	628	20	478	2.97e-31	134	ankyrin repeat protein [Penguinpox virus].	Penguinpox virus	Viruses;Varidnaviria;Bamfordvirae;Nucleocytoviricota;Pokkesviricetes;Chitovirales;Poxviridae;Chordopoxvirinae;Avipoxvirus.	Poxviridae	dsDNA
TRINITY_DN2020_c1_g1_i9	YP_009325865.1	2822	22.689	476	276	21	1439	84	133	540	0.00048	47.8	ATPase [Only Syngen Nebraska virus 5].	Only Syngen Nebraska virus 5	Viruses;Varidnaviria;Bamfordvirae;Nucleocytoviricota;Megaviricetes;Algavirales;Phycodnaviridae;Chlorovirus.	Phycodnaviridae	dsDNA
TRINITY_DN6113_c1_g1_i5	YP_010804160.1	1970	22.689	476	299	12	311	1603	68	519	9.27e-22	103	long-chain fatty acid CoA synthetase [Fadolivirusalgeromassiliense].	Fadolivirus algeromassiliense	Viruses;Varidnaviria;Bamfordvirae;Nucleocytoviricota;Megaviricetes;Imitervirales;Mimiviridae;Klosneuvirinae;Fadolivirus.	Mimiviridae	dsDNA
TRINITY_DN6113_c1_g1_i4	YP_009448636.1	1907	24.58	476	302	18	121	1503	8	441	4.47e-27	118	Cytochrome P450-like protein E-class [Orpheovirus IHUMI-LCC2].	Orpheovirus IHUMI-LCC2	Viruses;Varidnaviria;Bamfordvirae;Nucleocytoviricota;Megaviricetes;Algavirales;Phycodnaviridae.	Phycodnaviridae	dsDNA
TRINITY_DN6113_c1_g1_i2	YP_004732897.1	1847	25	476	270	15	152	1468	348	773	1.09e-28	125	hypothetical protein WIV_gp114 [Wiseana iridescent virus].	Wiseana iridescent virus	Viruses;Varidnaviria;Bamfordvirae;Nucleocytoviricota;Megaviricetes;Pimascovirales;Iridoviridae;Betairidovirinae;Chloriridovirus;Invertebrateiridescentvirus9.	Iridoviridae	dsDNA
TRINITY_DN6113_c1_g1_i1	NP_570746.1	1724	23.529	476	291	17	1550	288	49	506	9.08e-18	90.5	complement binding protein [Macacine gammaherpesvirus 5].	Macacine gammaherpesvirus 5	Viruses;Duplodnaviria;Heunggongvirae;Peploviricota;Herviviricetes;Herpesvirales;Orthoherpesviridae;Gammaherpesvirinae;Rhadinovirus;Rhadinovirusmacacinegamma5.	Orthoherpesviridae	dsDNA
TRINITY_DN4203_c2_g1_i5	YP_009177124.1	8911	28.421	475	292	9	7401	6091	20	484	1.42e-32	142	ankyrin repeat family protein [Turkeypox virus].	Turkeypox virus	Viruses;Varidnaviria;Bamfordvirae;Nucleocytoviricota;Pokkesviricetes;Chitovirales;Poxviridae;Chordopoxvirinae;Avipoxvirus.	Poxviridae	dsDNA
TRINITY_DN45114_c0_g1_i3	YP_009177124.1	8797	28.421	475	292	9	7287	5977	20	484	1.4e-32	142	ankyrin repeat family protein [Turkeypox virus].	Turkeypox virus	Viruses;Varidnaviria;Bamfordvirae;Nucleocytoviricota;Pokkesviricetes;Chitovirales;Poxviridae;Chordopoxvirinae;Avipoxvirus.	Poxviridae	dsDNA
TRINITY_DN45114_c0_g1_i1	YP_009177124.1	8179	28.421	475	292	9	6669	5359	20	484	1.28e-32	142	ankyrin repeat family protein [Turkeypox virus].	Turkeypox virus	Viruses;Varidnaviria;Bamfordvirae;Nucleocytoviricota;Pokkesviricetes;Chitovirales;Poxviridae;Chordopoxvirinae;Avipoxvirus.	Poxviridae	dsDNA
TRINITY_DN2543_c1_g1_i4	YP_009177124.1	8065	28.421	475	292	9	6555	5245	20	484	1.26e-32	142	ankyrin repeat family protein [Turkeypox virus].	Turkeypox virus	Viruses;Varidnaviria;Bamfordvirae;Nucleocytoviricota;Pokkesviricetes;Chitovirales;Poxviridae;Chordopoxvirinae;Avipoxvirus.	Poxviridae	dsDNA
TRINITY_DN57203_c0_g4_i5	YP_009177124.1	6697	28.421	475	292	9	5187	3877	20	484	9.88e-33	142	ankyrin repeat family protein [Turkeypox virus].	Turkeypox virus	Viruses;Varidnaviria;Bamfordvirae;Nucleocytoviricota;Pokkesviricetes;Chitovirales;Poxviridae;Chordopoxvirinae;Avipoxvirus.	Poxviridae	dsDNA
TRINITY_DN979_c0_g1_i7	YP_009177124.1	6062	28.421	475	292	9	4552	3242	20	484	8.63e-33	142	ankyrin repeat family protein [Turkeypox virus].	Turkeypox virus	Viruses;Varidnaviria;Bamfordvirae;Nucleocytoviricota;Pokkesviricetes;Chitovirales;Poxviridae;Chordopoxvirinae;Avipoxvirus.	Poxviridae	dsDNA
TRINITY_DN979_c0_g1_i2	YP_010781262.1	4812	25.474	475	282	17	3209	1989	305	775	1.96e-21	105	mimivirus elongation factor aef-2 [Tupanvirus deep ocean].	Tupanvirus deep ocean	Viruses;Varidnaviria;Bamfordvirae;Nucleocytoviricota;Megaviricetes;Imitervirales;Mimiviridae;Megamimivirinae;Tupanvirus.	Mimiviridae	dsDNA
TRINITY_DN979_c0_g1_i13	YP_010781262.1	4809	25.474	475	282	17	3209	1989	305	775	1.96e-21	105	mimivirus elongation factor aef-2 [Tupanvirus deep ocean].	Tupanvirus deep ocean	Viruses;Varidnaviria;Bamfordvirae;Nucleocytoviricota;Megaviricetes;Imitervirales;Mimiviridae;Megamimivirinae;Tupanvirus.	Mimiviridae	dsDNA
TRINITY_DN979_c0_g1_i1	YP_001427077.1	7160	25.527	474	217	21	5305	4010	28	407	1.34e-16	90.1	Holliday junction branch migration helicase [Chlorovirusheliozoae].	Chlorovirus heliozoae	Viruses;Varidnaviria;Bamfordvirae;Nucleocytoviricota;Megaviricetes;Algavirales;Phycodnaviridae;Chlorovirus.	Phycodnaviridae	dsDNA
TRINITY_DN979_c0_g1_i16	YP_009483690.1	2729	29.747	474	268	16	522	1913	42	460	8.43e-47	180	Carboxylic ester hydrolase [Pandoravirus quercus].	Pandoravirus quercus	Viruses;Pandoravirus.	Pandoravirus	dsDNA
TRINITY_DN113819_c0_g1_i7	YP_010796784.1	2167	25.105	474	276	16	412	1815	25	425	5.45e-26	115	putative gamma-glutamyl transpeptidase [Diachasmimorphalongicaudata entomopoxvirus].	Diachasmimorpha longicaudata entomopoxvirus	Viruses;Varidnaviria;Bamfordvirae;Nucleocytoviricota;Pokkesviricetes;Chitovirales;Poxviridae;Entomopoxvirinae;Diachasmimorphaentomopoxvirus.	Poxviridae	dsDNA
TRINITY_DN6515_c0_g1_i5	YP_010803569.1	1821	35.021	474	268	17	288	1646	21	475	8.65e-75	250	cysteinyl-tRNA synthetase [Fadolivirus algeromassiliense].	Fadolivirus algeromassiliense	Viruses;Varidnaviria;Bamfordvirae;Nucleocytoviricota;Megaviricetes;Imitervirales;Mimiviridae;Klosneuvirinae;Fadolivirus.	Mimiviridae	dsDNA
TRINITY_DN9082_c0_g3_i1	YP_010789287.1	1790	30.38	474	276	17	100	1374	40	508	1.1e-39	157	ankyrin repeat protein [Megavirus baoshan].	Megavirus baoshan	Viruses;Varidnaviria;Bamfordvirae;Nucleocytoviricota;Megaviricetes;Imitervirales;Mimiviridae;Megamimivirinae;Megavirus;Megavirusbaoshanense.	Mimiviridae	dsDNA
TRINITY_DN12213_c0_g4_i1	YP_010783546.1	1610	43.46	474	247	6	63	1484	10	462	2.33e-108	356	DNA-directed RNA polymerase II subunit Rpb1 [Tetraselmis virus 1].	Tetraselmis virus 1	Viruses;Varidnaviria;Bamfordvirae;Nucleocytoviricota;Megaviricetes;Imitervirales;Allomimiviridae;Oceanusvirus;Oceanusviruskaneohense.	Allomimiviridae	dsDNA
TRINITY_DN3800_c0_g1_i6	YP_010803161.1	2671	30.021	473	310	7	2	1399	63	521	2.24e-54	196	peptidase M16 [Fadolivirus algeromassiliense].	Fadolivirus algeromassiliense	Viruses;Varidnaviria;Bamfordvirae;Nucleocytoviricota;Megaviricetes;Imitervirales;Mimiviridae;Klosneuvirinae;Fadolivirus.	Mimiviridae	dsDNA
TRINITY_DN21977_c0_g1_i8	YP_009483690.1	1994	32.347	473	270	21	1739	378	54	495	5.1e-48	181	Carboxylic ester hydrolase [Pandoravirus quercus].	Pandoravirus quercus	Viruses;Pandoravirus.	Pandoravirus	dsDNA
TRINITY_DN2020_c1_g1_i19	YP_009001225.1	1821	27.484	473	301	14	14	1375	115	564	8.23e-41	160	ABC transporter [Pithovirus sibericum].	Pithovirus sibericum	Viruses;Pithoviruses;Pithovirus.	Pithovirus	dsDNA
TRINITY_DN113819_c0_g3_i1	YP_010804160.1	1653	24.313	473	269	19	344	1585	61	503	1.85e-19	95.5	long-chain fatty acid CoA synthetase [Fadolivirusalgeromassiliense].	Fadolivirus algeromassiliense	Viruses;Varidnaviria;Bamfordvirae;Nucleocytoviricota;Megaviricetes;Imitervirales;Mimiviridae;Klosneuvirinae;Fadolivirus.	Mimiviridae	dsDNA
TRINITY_DN53619_c2_g1_i3	YP_010803343.1	4133	39.831	472	277	5	440	1840	6	475	1.17e-109	358	inosine-5-monophosphate dehydrogenase [Fadolivirusalgeromassiliense].	Fadolivirus algeromassiliense	Viruses;Varidnaviria;Bamfordvirae;Nucleocytoviricota;Megaviricetes;Imitervirales;Mimiviridae;Klosneuvirinae;Fadolivirus.	Mimiviridae	dsDNA
TRINITY_DN2020_c1_g1_i8	YP_010796575.1	2485	29.449	472	311	9	2243	861	16	476	2.83e-58	210	EGT [Mythimna unipuncta nucleopolyhedrovirus].	Mythimna unipuncta nucleopolyhedrovirus	Viruses;Naldaviricetes;Lefavirales;Baculoviridae;Alphabaculovirus.	Baculoviridae	dsDNA
TRINITY_DN93971_c0_g1_i1	YP_758442.1	1755	28.814	472	314	12	1517	141	55	517	5.74e-51	187	egt [Leucania separata nucleopolyhedrovirus].	Leucania separata nucleopolyhedrovirus	Viruses;Naldaviricetes;Lefavirales;Baculoviridae;Alphabaculovirus;Alphabaculovirusleseparatae.	Baculoviridae	dsDNA
TRINITY_DN2020_c1_g1_i11	YP_010780309.1	1802	25.902	471	309	11	1596	211	1	440	4.78e-32	136	NcpA [Tupanvirus deep ocean].	Tupanvirus deep ocean	Viruses;Varidnaviria;Bamfordvirae;Nucleocytoviricota;Megaviricetes;Imitervirales;Mimiviridae;Megamimivirinae;Tupanvirus.	Mimiviridae	dsDNA
TRINITY_DN19775_c0_g1_i24	YP_758442.1	1758	31.635	471	303	15	1520	141	55	517	6.73e-59	208	egt [Leucania separata nucleopolyhedrovirus].	Leucania separata nucleopolyhedrovirus	Viruses;Naldaviricetes;Lefavirales;Baculoviridae;Alphabaculovirus;Alphabaculovirusleseparatae.	Baculoviridae	dsDNA
TRINITY_DN19775_c0_g1_i37	YP_628286.1	3826	54.255	470	207	4	938	2341	63	526	1.5e-174	532	protein-tyrosine kinase [Y73 sarcoma virus].	Y73 sarcoma virus	Viruses;Riboviria;Pararnavirae;Artverviricota;Revtraviricetes;Ortervirales;Retroviridae;Orthoretrovirinae;Alpharetrovirus.	Retroviridae	ssRNA-RT
TRINITY_DN19775_c0_g1_i12	YP_628286.1	3807	54.255	470	207	4	919	2322	63	526	1.3e-174	532	protein-tyrosine kinase [Y73 sarcoma virus].	Y73 sarcoma virus	Viruses;Riboviria;Pararnavirae;Artverviricota;Revtraviricetes;Ortervirales;Retroviridae;Orthoretrovirinae;Alpharetrovirus.	Retroviridae	ssRNA-RT
TRINITY_DN19775_c0_g1_i34	YP_009483487.1	3049	29.574	470	259	21	912	2285	39	448	9.59e-32	135	Carboxylic ester hydrolase [Pandoravirus quercus].	Pandoravirus quercus	Viruses;Pandoravirus.	Pandoravirus	dsDNA
TRINITY_DN138075_c0_g1_i10	YP_009483487.1	2944	29.574	470	259	21	807	2180	39	448	9.01e-32	135	Carboxylic ester hydrolase [Pandoravirus quercus].	Pandoravirus quercus	Viruses;Pandoravirus.	Pandoravirus	dsDNA
TRINITY_DN5279_c0_g1_i3	YP_009483487.1	2390	29.574	470	259	21	253	1626	39	448	4.4e-32	135	Carboxylic ester hydrolase [Pandoravirus quercus].	Pandoravirus quercus	Viruses;Pandoravirus.	Pandoravirus	dsDNA
TRINITY_DN130876_c0_g1_i7	YP_009483487.1	2358	29.574	470	259	21	221	1594	39	448	4.4e-32	135	Carboxylic ester hydrolase [Pandoravirus quercus].	Pandoravirus quercus	Viruses;Pandoravirus.	Pandoravirus	dsDNA
TRINITY_DN130876_c0_g1_i4	YP_010780181.1	2215	28.511	470	286	11	306	1700	122	546	1.04e-47	184	hypothetical protein QJ856_gp1184 [Tupanvirus deep ocean].	Tupanvirus deep ocean	Viruses;Varidnaviria;Bamfordvirae;Nucleocytoviricota;Megaviricetes;Imitervirales;Mimiviridae;Megamimivirinae;Tupanvirus.	Mimiviridae	dsDNA
TRINITY_DN130876_c0_g1_i10	NP_073525.1	3505	21.109	469	323	10	2558	1194	13	448	1.2e-26	102	140R protein [Yaba-like disease virus].	Yaba-like disease virus	Viruses;Varidnaviria;Bamfordvirae;Nucleocytoviricota;Pokkesviricetes;Chitovirales;Poxviridae;Chordopoxvirinae;Yatapoxvirus;Tanapoxvirus.	Poxviridae	dsDNA
TRINITY_DN15121_c0_g1_i17	NP_073525.1	3184	21.109	469	323	10	2237	873	13	448	3.25e-21	102	140R protein [Yaba-like disease virus].	Yaba-like disease virus	Viruses;Varidnaviria;Bamfordvirae;Nucleocytoviricota;Pokkesviricetes;Chitovirales;Poxviridae;Chordopoxvirinae;Yatapoxvirus;Tanapoxvirus.	Poxviridae	dsDNA
TRINITY_DN15121_c0_g1_i52	YP_009448636.1	1807	24.145	468	264	15	225	1592	53	441	1.47e-25	113	Cytochrome P450-like protein E-class [Orpheovirus IHUMI-LCC2].	Orpheovirus IHUMI-LCC2	Viruses;Varidnaviria;Bamfordvirae;Nucleocytoviricota;Megaviricetes;Algavirales;Phycodnaviridae.	Phycodnaviridae	dsDNA
TRINITY_DN15121_c0_g1_i31	YP_010776588.1	1797	34.188	468	287	11	1612	254	3	464	1.78e-90	290	hypothetical protein QJ849_gp675 [Powai lake megavirus].	Powai lake megavirus	Viruses;Varidnaviria;Bamfordvirae;Nucleocytoviricota;Megaviricetes;Imitervirales;Mimiviridae;Megamimivirinae;Megavirus;Megaviruspowaiense.	Mimiviridae	dsDNA
TRINITY_DN15121_c0_g1_i25	YP_010779553.1	2057	30.193	467	263	14	1636	245	61	467	5.37e-45	170	repeat protein [Moumouvirus goulette].	Moumouvirus goulette	Viruses;Varidnaviria;Bamfordvirae;Nucleocytoviricota;Megaviricetes;Imitervirales;Mimiviridae;Megamimivirinae;Moumouvirus;Moumouvirusgoulettemassiliense.	Mimiviridae	dsDNA
TRINITY_DN15121_c0_g1_i27	YP_010788611.1	2034	33.619	467	277	15	201	1541	18	471	2.1e-64	223	asparaginyl-tRNA synthetase [Megavirus baoshan].	Megavirus baoshan	Viruses;Varidnaviria;Bamfordvirae;Nucleocytoviricota;Megaviricetes;Imitervirales;Mimiviridae;Megamimivirinae;Megavirus;Megavirusbaoshanense.	Mimiviridae	dsDNA
TRINITY_DN15121_c0_g1_i22	YP_010803309.1	1964	33.191	467	292	9	362	1732	3	459	6.07e-63	219	carbohydrate kinase pfkb with cytidyltransferase-like domain[Fadolivirus algeromassiliense].	Fadolivirus algeromassiliense	Viruses;Varidnaviria;Bamfordvirae;Nucleocytoviricota;Megaviricetes;Imitervirales;Mimiviridae;Klosneuvirinae;Fadolivirus.	Mimiviridae	dsDNA
TRINITY_DN15121_c0_g1_i21	NP_047448.1	4009	25.966	466	307	14	2941	1619	12	464	7.6e-36	147	GTA [Bombyx mori nucleopolyhedrovirus].	Bombyx mori nucleopolyhedrovirus	Viruses;Naldaviricetes;Lefavirales;Baculoviridae;Alphabaculovirus;Alphabaculovirusbomori.	Baculoviridae	dsDNA
TRINITY_DN491402_c0_g1_i1	NP_047448.1	3347	25.966	466	307	14	2400	1078	12	464	5.8e-36	147	GTA [Bombyx mori nucleopolyhedrovirus].	Bombyx mori nucleopolyhedrovirus	Viruses;Naldaviricetes;Lefavirales;Baculoviridae;Alphabaculovirus;Alphabaculovirusbomori.	Baculoviridae	dsDNA
TRINITY_DN448_c0_g1_i1	YP_010796575.1	1942	30.687	466	307	8	261	1625	16	476	1.14e-64	224	EGT [Mythimna unipuncta nucleopolyhedrovirus].	Mythimna unipuncta nucleopolyhedrovirus	Viruses;Naldaviricetes;Lefavirales;Baculoviridae;Alphabaculovirus.	Baculoviridae	dsDNA
TRINITY_DN63040_c0_g3_i1	YP_010796575.1	1586	29.399	466	282	13	1317	1	6	451	4.35e-53	191	EGT [Mythimna unipuncta nucleopolyhedrovirus].	Mythimna unipuncta nucleopolyhedrovirus	Viruses;Naldaviricetes;Lefavirales;Baculoviridae;Alphabaculovirus.	Baculoviridae	dsDNA
TRINITY_DN3406_c0_g1_i20	YP_010803393.1	3318	29.032	465	265	13	468	1853	2	404	8.9e-51	188	orotidine 5-phosphate decarboxylase [Fadolivirusalgeromassiliense].	Fadolivirus algeromassiliense	Viruses;Varidnaviria;Bamfordvirae;Nucleocytoviricota;Megaviricetes;Imitervirales;Mimiviridae;Klosneuvirinae;Fadolivirus.	Mimiviridae	dsDNA
TRINITY_DN3406_c0_g1_i18	YP_010804160.1	1825	29.462	465	268	19	417	1712	41	478	6.41e-41	160	long-chain fatty acid CoA synthetase [Fadolivirusalgeromassiliense].	Fadolivirus algeromassiliense	Viruses;Varidnaviria;Bamfordvirae;Nucleocytoviricota;Megaviricetes;Imitervirales;Mimiviridae;Klosneuvirinae;Fadolivirus.	Mimiviridae	dsDNA
TRINITY_DN2249_c0_g1_i1	YP_009177124.1	6269	28.879	464	280	10	4621	3347	20	472	4.3e-33	142	ankyrin repeat family protein [Turkeypox virus].	Turkeypox virus	Viruses;Varidnaviria;Bamfordvirae;Nucleocytoviricota;Pokkesviricetes;Chitovirales;Poxviridae;Chordopoxvirinae;Avipoxvirus.	Poxviridae	dsDNA
TRINITY_DN6299_c0_g1_i12	YP_009177124.1	6203	28.879	464	280	10	4555	3281	20	472	4.24e-33	142	ankyrin repeat family protein [Turkeypox virus].	Turkeypox virus	Viruses;Varidnaviria;Bamfordvirae;Nucleocytoviricota;Pokkesviricetes;Chitovirales;Poxviridae;Chordopoxvirinae;Avipoxvirus.	Poxviridae	dsDNA
TRINITY_DN6299_c0_g1_i19	YP_009177124.1	6095	28.879	464	280	10	4447	3173	20	472	4.14e-33	142	ankyrin repeat family protein [Turkeypox virus].	Turkeypox virus	Viruses;Varidnaviria;Bamfordvirae;Nucleocytoviricota;Pokkesviricetes;Chitovirales;Poxviridae;Chordopoxvirinae;Avipoxvirus.	Poxviridae	dsDNA
TRINITY_DN61414_c1_g1_i8	YP_009177124.1	6011	28.879	464	280	10	4363	3089	20	472	2.38e-33	143	ankyrin repeat family protein [Turkeypox virus].	Turkeypox virus	Viruses;Varidnaviria;Bamfordvirae;Nucleocytoviricota;Pokkesviricetes;Chitovirales;Poxviridae;Chordopoxvirinae;Avipoxvirus.	Poxviridae	dsDNA
TRINITY_DN3556_c0_g2_i6	YP_009177124.1	5780	28.879	464	280	10	4132	2858	20	472	3.85e-33	142	ankyrin repeat family protein [Turkeypox virus].	Turkeypox virus	Viruses;Varidnaviria;Bamfordvirae;Nucleocytoviricota;Pokkesviricetes;Chitovirales;Poxviridae;Chordopoxvirinae;Avipoxvirus.	Poxviridae	dsDNA
TRINITY_DN11922_c1_g8_i1	YP_010803626.1	3723	24.138	464	288	16	1866	526	458	874	7.34e-16	86.7	P-type ATPase subfamily IV [Fadolivirus algeromassiliense].	Fadolivirus algeromassiliense	Viruses;Varidnaviria;Bamfordvirae;Nucleocytoviricota;Megaviricetes;Imitervirales;Mimiviridae;Klosneuvirinae;Fadolivirus.	Mimiviridae	dsDNA
TRINITY_DN2249_c0_g1_i4	YP_009177124.1	3571	28.879	464	280	10	1923	649	20	472	7.43e-34	144	ankyrin repeat family protein [Turkeypox virus].	Turkeypox virus	Viruses;Varidnaviria;Bamfordvirae;Nucleocytoviricota;Pokkesviricetes;Chitovirales;Poxviridae;Chordopoxvirinae;Avipoxvirus.	Poxviridae	dsDNA
TRINITY_DN9639_c0_g1_i4	YP_009000992.1	2404	32.328	464	252	11	2084	822	6	450	1.16e-70	242	2-aminooxy adenylosuccinate synthetase [Pithovirus sibericum].	Pithovirus sibericum	Viruses;Pithoviruses;Pithovirus.	Pithovirus	dsDNA
TRINITY_DN441_c1_g1_i16	YP_009000992.1	2363	32.328	464	252	11	2084	822	6	450	9.37e-71	242	2-aminooxy adenylosuccinate synthetase [Pithovirus sibericum].	Pithovirus sibericum	Viruses;Pithoviruses;Pithovirus.	Pithovirus	dsDNA
TRINITY_DN51513_c1_g2_i4	YP_010781535.1	1745	39.655	464	222	12	1506	154	7	425	1.18e-99	313	alanyl-tRNA synthetase [Tupanvirus soda lake].	Tupanvirus soda lake	Viruses;Varidnaviria;Bamfordvirae;Nucleocytoviricota;Megaviricetes;Imitervirales;Mimiviridae;Megamimivirinae;Tupanvirus.	Mimiviridae	dsDNA
TRINITY_DN51513_c1_g2_i3	YP_009388574.1	1642	28.664	464	280	16	108	1430	878	1313	2.13e-40	160	tegument protein G75 [Common bottlenose dolphin gammaherpesvirus 1strain Sarasota].	Common bottlenose dolphin gammaherpesvirus 1 strain Sarasota	Viruses;Duplodnaviria;Heunggongvirae;Peploviricota;Herviviricetes;Herpesvirales;Orthoherpesviridae;Gammaherpesvirinae;Bossavirus;Bossavirusdelphinidgamma1.	Orthoherpesviridae	dsDNA
TRINITY_DN51513_c1_g2_i1	YP_010804160.1	2451	24.406	463	271	12	2198	990	61	504	2.73e-20	99.4	long-chain fatty acid CoA synthetase [Fadolivirusalgeromassiliense].	Fadolivirus algeromassiliense	Viruses;Varidnaviria;Bamfordvirae;Nucleocytoviricota;Megaviricetes;Imitervirales;Mimiviridae;Klosneuvirinae;Fadolivirus.	Mimiviridae	dsDNA
TRINITY_DN51513_c1_g2_i7	YP_010804160.1	1733	24.406	463	271	12	1480	272	61	504	1.13e-20	99.8	long-chain fatty acid CoA synthetase [Fadolivirusalgeromassiliense].	Fadolivirus algeromassiliense	Viruses;Varidnaviria;Bamfordvirae;Nucleocytoviricota;Megaviricetes;Imitervirales;Mimiviridae;Klosneuvirinae;Fadolivirus.	Mimiviridae	dsDNA
TRINITY_DN79842_c0_g1_i9	YP_611073.1	5252	25.974	462	298	12	4302	2968	28	462	3.34e-38	154	global transactivator [Antheraea pernyi nucleopolyhedrovirus].	Antheraea pernyi nucleopolyhedrovirus	Viruses;Naldaviricetes;Lefavirales;Baculoviridae;Alphabaculovirus;Alphabaculovirusanpernyi.	Baculoviridae	dsDNA
TRINITY_DN12192_c0_g1_i3	YP_010781535.1	3069	39.394	462	231	12	2681	1389	11	454	7.84e-94	308	alanyl-tRNA synthetase [Tupanvirus soda lake].	Tupanvirus soda lake	Viruses;Varidnaviria;Bamfordvirae;Nucleocytoviricota;Megaviricetes;Imitervirales;Mimiviridae;Megamimivirinae;Tupanvirus.	Mimiviridae	dsDNA
TRINITY_DN12192_c0_g1_i6	YP_009352567.1	2687	27.332	461	265	14	1101	2336	60	499	1.32e-35	145	Peroxinectin [Kaumoebavirus].	Kaumoebavirus	Viruses.	Viruses	unclassified viruses
TRINITY_DN6413_c0_g1_i13	YP_010789287.1	4649	31.02	461	264	17	100	1338	40	494	8.53e-38	155	ankyrin repeat protein [Megavirus baoshan].	Megavirus baoshan	Viruses;Varidnaviria;Bamfordvirae;Nucleocytoviricota;Megaviricetes;Imitervirales;Mimiviridae;Megamimivirinae;Megavirus;Megavirusbaoshanense.	Mimiviridae	dsDNA
TRINITY_DN3184_c1_g1_i14	YP_010782446.1	3746	32.538	461	259	8	3222	1873	115	534	3.44e-54	204	putative acyl-CoA oxidase [Tupanvirus soda lake].	Tupanvirus soda lake	Viruses;Varidnaviria;Bamfordvirae;Nucleocytoviricota;Megaviricetes;Imitervirales;Mimiviridae;Megamimivirinae;Tupanvirus.	Mimiviridae	dsDNA
TRINITY_DN579_c0_g1_i19	YP_009000992.1	3268	39.913	461	214	12	2930	1683	9	451	5.01e-91	302	2-aminooxy adenylosuccinate synthetase [Pithovirus sibericum].	Pithovirus sibericum	Viruses;Pithoviruses;Pithovirus.	Pithovirus	dsDNA
TRINITY_DN579_c0_g1_i1	YP_010803214.1	2710	33.406	461	252	9	599	1900	40	472	3.42e-67	236	GTP binding translation elongation factor [Fadolivirusalgeromassiliense].	Fadolivirus algeromassiliense	Viruses;Varidnaviria;Bamfordvirae;Nucleocytoviricota;Megaviricetes;Imitervirales;Mimiviridae;Klosneuvirinae;Fadolivirus.	Mimiviridae	dsDNA
TRINITY_DN579_c0_g1_i23	YP_010777233.1	2257	21.692	461	297	13	131	1462	22	435	8.14e-08	58.9	putative ubiquitin-specific protease [Acanthamoeba polyphagamimivirus].	Acanthamoeba polyphaga mimivirus	Viruses;Varidnaviria;Bamfordvirae;Nucleocytoviricota;Megaviricetes;Imitervirales;Mimiviridae;Megamimivirinae;Mimivirus;Mimivirusbradfordmassiliense.	Mimiviridae	dsDNA
TRINITY_DN3556_c0_g2_i13	YP_009448636.1	1712	26.681	461	278	17	1554	196	38	446	8e-30	125	Cytochrome P450-like protein E-class [Orpheovirus IHUMI-LCC2].	Orpheovirus IHUMI-LCC2	Viruses;Varidnaviria;Bamfordvirae;Nucleocytoviricota;Megaviricetes;Algavirales;Phycodnaviridae.	Phycodnaviridae	dsDNA
TRINITY_DN78601_c0_g1_i29	YP_611073.1	8851	28.478	460	278	15	98	1432	49	472	1.14e-33	141	global transactivator [Antheraea pernyi nucleopolyhedrovirus].	Antheraea pernyi nucleopolyhedrovirus	Viruses;Naldaviricetes;Lefavirales;Baculoviridae;Alphabaculovirus;Alphabaculovirusanpernyi.	Baculoviridae	dsDNA
TRINITY_DN78601_c0_g1_i34	YP_009483690.1	2301	25.435	460	263	16	2092	809	108	519	9.33e-28	122	Carboxylic ester hydrolase [Pandoravirus quercus].	Pandoravirus quercus	Viruses;Pandoravirus.	Pandoravirus	dsDNA
TRINITY_DN9436_c2_g1_i3	YP_009552663.1	1809	28.696	460	301	10	1556	222	12	459	1.14e-55	199	EGT [Operophtera brumata nucleopolyhedrovirus].	Operophtera brumata nucleopolyhedrovirus	Viruses;Naldaviricetes;Lefavirales;Baculoviridae;Alphabaculovirus;Alphabaculovirusopbrumatae.	Baculoviridae	dsDNA
TRINITY_DN9436_c2_g1_i4	YP_009001498.1	8261	25.708	459	285	16	5944	7302	339	747	1.61e-26	123	ABC transporter [Anomala cuprea entomopoxvirus].	Anomala cuprea entomopoxvirus	Viruses;Varidnaviria;Bamfordvirae;Nucleocytoviricota;Pokkesviricetes;Chitovirales;Poxviridae;Entomopoxvirinae;Alphaentomopoxvirus.	Poxviridae	dsDNA
TRINITY_DN3313_c0_g1_i19	YP_009001498.1	7887	25.708	459	285	16	5944	7302	339	747	1.6e-26	123	ABC transporter [Anomala cuprea entomopoxvirus].	Anomala cuprea entomopoxvirus	Viruses;Varidnaviria;Bamfordvirae;Nucleocytoviricota;Pokkesviricetes;Chitovirales;Poxviridae;Entomopoxvirinae;Alphaentomopoxvirus.	Poxviridae	dsDNA
TRINITY_DN3313_c0_g1_i8	YP_009001498.1	7827	25.708	459	285	16	5944	7302	339	747	1.58e-26	123	ABC transporter [Anomala cuprea entomopoxvirus].	Anomala cuprea entomopoxvirus	Viruses;Varidnaviria;Bamfordvirae;Nucleocytoviricota;Pokkesviricetes;Chitovirales;Poxviridae;Entomopoxvirinae;Alphaentomopoxvirus.	Poxviridae	dsDNA
TRINITY_DN2233_c0_g2_i3	YP_009001498.1	7777	25.708	459	285	16	5944	7302	339	747	1.65e-26	123	ABC transporter [Anomala cuprea entomopoxvirus].	Anomala cuprea entomopoxvirus	Viruses;Varidnaviria;Bamfordvirae;Nucleocytoviricota;Pokkesviricetes;Chitovirales;Poxviridae;Entomopoxvirinae;Alphaentomopoxvirus.	Poxviridae	dsDNA
TRINITY_DN4939_c0_g2_i31	YP_009165152.1	1656	24.837	459	300	15	1523	225	70	509	3.63e-31	130	Cytochrome P450 [Mollivirus sibericum].	Mollivirus sibericum	Viruses.	Viruses	unclassified viruses
TRINITY_DN4939_c0_g2_i30	NP_052026.1	2890	21.569	459	302	13	115	1464	116	525	8.91e-13	75.5	gp140R [Rabbit fibroma virus].	Rabbit fibroma virus	Viruses;Varidnaviria;Bamfordvirae;Nucleocytoviricota;Pokkesviricetes;Chitovirales;Poxviridae;Chordopoxvirinae;Leporipoxvirus.	Poxviridae	dsDNA
TRINITY_DN4939_c0_g2_i32	YP_010780309.1	2854	19.826	459	296	15	342	1691	17	412	3.75e-05	51.6	NcpA [Tupanvirus deep ocean].	Tupanvirus deep ocean	Viruses;Varidnaviria;Bamfordvirae;Nucleocytoviricota;Megaviricetes;Imitervirales;Mimiviridae;Megamimivirinae;Tupanvirus.	Mimiviridae	dsDNA
TRINITY_DN118696_c0_g1_i15	YP_010780494.1	2788	29.63	459	283	14	1878	595	48	497	1.65e-46	177	aspartyl-tRNA synthetase [Tupanvirus deep ocean].	Tupanvirus deep ocean	Viruses;Varidnaviria;Bamfordvirae;Nucleocytoviricota;Megaviricetes;Imitervirales;Mimiviridae;Megamimivirinae;Tupanvirus.	Mimiviridae	dsDNA
TRINITY_DN118696_c0_g1_i2	YP_009329403.1	2402	30.719	459	274	14	372	1694	12	444	4.69e-53	197	ABC transporter, partial [Cedratvirus A11].	Cedratvirus A11	Viruses;Pithoviruses.	Pithoviruses	dsDNA
TRINITY_DN16487_c3_g1_i3	YP_010780494.1	2247	48.366	459	235	2	540	1916	41	497	4.17e-149	447	aspartyl-tRNA synthetase [Tupanvirus deep ocean].	Tupanvirus deep ocean	Viruses;Varidnaviria;Bamfordvirae;Nucleocytoviricota;Megaviricetes;Imitervirales;Mimiviridae;Megamimivirinae;Tupanvirus.	Mimiviridae	dsDNA
TRINITY_DN4939_c0_g2_i27	YP_009448636.1	1609	26.144	459	280	17	97	1419	21	438	4.89e-28	120	Cytochrome P450-like protein E-class [Orpheovirus IHUMI-LCC2].	Orpheovirus IHUMI-LCC2	Viruses;Varidnaviria;Bamfordvirae;Nucleocytoviricota;Megaviricetes;Algavirales;Phycodnaviridae.	Phycodnaviridae	dsDNA
TRINITY_DN185752_c0_g1_i4	YP_010780309.1	3015	19.869	458	295	15	503	1849	17	411	6.92e-05	50.8	NcpA [Tupanvirus deep ocean].	Tupanvirus deep ocean	Viruses;Varidnaviria;Bamfordvirae;Nucleocytoviricota;Megaviricetes;Imitervirales;Mimiviridae;Megamimivirinae;Tupanvirus.	Mimiviridae	dsDNA
TRINITY_DN45274_c0_g1_i13	YP_009046239.1	2427	30.349	458	267	10	2271	919	14	426	9.07e-38	153	ankyrin repeat protein [Penguinpox virus].	Penguinpox virus	Viruses;Varidnaviria;Bamfordvirae;Nucleocytoviricota;Pokkesviricetes;Chitovirales;Poxviridae;Chordopoxvirinae;Avipoxvirus.	Poxviridae	dsDNA
TRINITY_DN45274_c0_g1_i10	YP_007354480.1	3712	22.976	457	274	21	1816	3069	24	441	0.000154	49.3	peptidase C19 subfamily protein [Acanthamoeba polyphagamoumouvirus].	Acanthamoeba polyphaga moumouvirus	Viruses;Varidnaviria;Bamfordvirae;Nucleocytoviricota;Megaviricetes;Imitervirales;Mimiviridae;Megamimivirinae;Moumouvirus.	Mimiviridae	dsDNA
TRINITY_DN41699_c3_g1_i13	YP_010803877.1	1827	39.168	457	264	10	146	1498	6	454	5.76e-101	317	adenylsuccinate lyase [Fadolivirus algeromassiliense].	Fadolivirus algeromassiliense	Viruses;Varidnaviria;Bamfordvirae;Nucleocytoviricota;Megaviricetes;Imitervirales;Mimiviridae;Klosneuvirinae;Fadolivirus.	Mimiviridae	dsDNA
TRINITY_DN3427_c0_g1_i18	YP_009483690.1	1744	29.322	457	263	19	1335	22	42	457	6.05e-32	134	Carboxylic ester hydrolase [Pandoravirus quercus].	Pandoravirus quercus	Viruses;Pandoravirus.	Pandoravirus	dsDNA
TRINITY_DN1236_c1_g1_i9	YP_010796961.1	2278	34.868	456	271	7	2205	901	418	868	3.14e-71	256	PolB [Mayetiola barley midge adintovirus].	Mayetiola barley midge adintovirus	Viruses;Varidnaviria;Bamfordvirae;Preplasmiviricota;Polintoviricetes;Orthopolintovirales;Adintoviridae;Alphadintovirus;Alphadintovirusmayetiola.	Adintoviridae	dsDNA
TRINITY_DN1236_c1_g1_i12	YP_009173627.1	6444	51.868	455	196	10	3502	4812	161	610	4.34e-110	370	Hsp70 protein [Chrysochromulina ericina virus].	Chrysochromulina ericina virus	Viruses;Varidnaviria;Bamfordvirae;Nucleocytoviricota;Megaviricetes;Algavirales;Phycodnaviridae.	Phycodnaviridae	dsDNA
TRINITY_DN1236_c1_g1_i19	YP_009172504.1	4342	47.692	455	216	3	990	2345	139	574	5.26e-126	407	hypothetical protein APZ24_gp013 [Ostreococcus lucimarinus virus2].	Ostreococcus lucimarinus virus 2	Viruses;Varidnaviria;Bamfordvirae;Nucleocytoviricota;Megaviricetes;Algavirales;Phycodnaviridae;Prasinovirus.	Phycodnaviridae	dsDNA
TRINITY_DN4658_c0_g1_i4	YP_009046239.1	3665	29.451	455	255	17	3146	1824	17	419	6.36e-32	136	ankyrin repeat protein [Penguinpox virus].	Penguinpox virus	Viruses;Varidnaviria;Bamfordvirae;Nucleocytoviricota;Pokkesviricetes;Chitovirales;Poxviridae;Chordopoxvirinae;Avipoxvirus.	Poxviridae	dsDNA
TRINITY_DN6299_c0_g1_i8	YP_009000992.1	3364	40	455	210	12	2912	1683	15	451	3.58e-89	297	2-aminooxy adenylosuccinate synthetase [Pithovirus sibericum].	Pithovirus sibericum	Viruses;Pithoviruses;Pithovirus.	Pithovirus	dsDNA
TRINITY_DN11784_c0_g1_i1	YP_009173653.1	3224	38.462	455	258	6	239	1558	999	1446	3.46e-92	327	DNA-directed RNA polymerase II, subunit RpB1 [Chrysochromulinaericina virus].	Chrysochromulina ericina virus	Viruses;Varidnaviria;Bamfordvirae;Nucleocytoviricota;Megaviricetes;Algavirales;Phycodnaviridae.	Phycodnaviridae	dsDNA
TRINITY_DN11784_c0_g1_i8	YP_009046239.1	3170	29.451	455	255	17	2342	1020	17	419	5.56e-32	136	ankyrin repeat protein [Penguinpox virus].	Penguinpox virus	Viruses;Varidnaviria;Bamfordvirae;Nucleocytoviricota;Pokkesviricetes;Chitovirales;Poxviridae;Chordopoxvirinae;Avipoxvirus.	Poxviridae	dsDNA
TRINITY_DN6413_c0_g1_i3	YP_010841598.1	2467	34.945	455	199	6	674	2029	97	457	5.01e-13	76.6	collagen triple helix repeat containing protein [Cotonvirusjaponicus].	Cotonvirus japonicus	Viruses;Varidnaviria;Bamfordvirae;Nucleocytoviricota;Megaviricetes;Imitervirales;Mimiviridae;Megamimivirinae;Cotonvirus;Cotonvirusjaponicum.	Mimiviridae	dsDNA
TRINITY_DN6413_c0_g1_i8	YP_009329403.1	2260	29.451	455	282	12	2035	698	12	436	6.6e-54	199	ABC transporter, partial [Cedratvirus A11].	Cedratvirus A11	Viruses;Pithoviruses.	Pithoviruses	dsDNA
TRINITY_DN16927_c0_g1_i1	YP_010803676.1	2247	27.473	455	241	10	159	1523	398	763	6.69e-45	176	valyl-tRNA synthetase [Fadolivirus algeromassiliense].	Fadolivirus algeromassiliense	Viruses;Varidnaviria;Bamfordvirae;Nucleocytoviricota;Megaviricetes;Imitervirales;Mimiviridae;Klosneuvirinae;Fadolivirus.	Mimiviridae	dsDNA
TRINITY_DN15121_c0_g1_i49	YP_010789287.1	4649	31.498	454	263	16	64	1293	63	512	6.57e-37	152	ankyrin repeat protein [Megavirus baoshan].	Megavirus baoshan	Viruses;Varidnaviria;Bamfordvirae;Nucleocytoviricota;Megaviricetes;Imitervirales;Mimiviridae;Megamimivirinae;Megavirus;Megavirusbaoshanense.	Mimiviridae	dsDNA
TRINITY_DN3029_c1_g3_i1	YP_010779936.1	4137	25.771	454	278	13	2740	1442	45	460	3.54e-24	112	hypothetical protein QJ854_gp081 [Moumouvirus goulette].	Moumouvirus goulette	Viruses;Varidnaviria;Bamfordvirae;Nucleocytoviricota;Megaviricetes;Imitervirales;Mimiviridae;Megamimivirinae;Moumouvirus;Moumouvirusgoulettemassiliense.	Mimiviridae	dsDNA
TRINITY_DN119063_c0_g1_i12	YP_010779936.1	4136	25.771	454	278	13	2740	1442	45	460	3.54e-24	112	hypothetical protein QJ854_gp081 [Moumouvirus goulette].	Moumouvirus goulette	Viruses;Varidnaviria;Bamfordvirae;Nucleocytoviricota;Megaviricetes;Imitervirales;Mimiviridae;Megamimivirinae;Moumouvirus;Moumouvirusgoulettemassiliense.	Mimiviridae	dsDNA
TRINITY_DN185752_c0_g1_i1	YP_010779936.1	4104	25.771	454	278	13	2707	1409	45	460	2.55e-24	112	hypothetical protein QJ854_gp081 [Moumouvirus goulette].	Moumouvirus goulette	Viruses;Varidnaviria;Bamfordvirae;Nucleocytoviricota;Megaviricetes;Imitervirales;Mimiviridae;Megamimivirinae;Moumouvirus;Moumouvirusgoulettemassiliense.	Mimiviridae	dsDNA
TRINITY_DN119063_c0_g1_i26	YP_009666148.1	2436	25.551	454	253	11	628	1977	5	377	8.63e-35	140	hypothetical protein FLA14_p101 [Diachasmimorpha longicaudataentomopoxvirus].	Diachasmimorpha longicaudata entomopoxvirus	Viruses;Varidnaviria;Bamfordvirae;Nucleocytoviricota;Pokkesviricetes;Chitovirales;Poxviridae;Entomopoxvirinae;Diachasmimorphaentomopoxvirus.	Poxviridae	dsDNA
TRINITY_DN22185_c0_g1_i1	YP_009480832.1	1856	20.705	454	289	13	1439	216	67	495	1.84e-14	79.7	Cytochrome P450 [Pandoravirus macleodensis].	Pandoravirus macleodensis	Viruses;Pandoravirus.	Pandoravirus	dsDNA
TRINITY_DN22185_c0_g1_i2	YP_009552663.1	1335	28.194	454	309	10	1329	1	4	451	8.68e-53	187	EGT [Operophtera brumata nucleopolyhedrovirus].	Operophtera brumata nucleopolyhedrovirus	Viruses;Naldaviricetes;Lefavirales;Baculoviridae;Alphabaculovirus;Alphabaculovirusopbrumatae.	Baculoviridae	dsDNA
TRINITY_DN629_c1_g1_i6	YP_010781535.1	4354	49.227	453	211	7	183	1514	1	443	1.19e-138	436	alanyl-tRNA synthetase [Tupanvirus soda lake].	Tupanvirus soda lake	Viruses;Varidnaviria;Bamfordvirae;Nucleocytoviricota;Megaviricetes;Imitervirales;Mimiviridae;Megamimivirinae;Tupanvirus.	Mimiviridae	dsDNA
TRINITY_DN15470_c0_g1_i13	YP_010781535.1	3745	49.227	453	211	7	611	1942	1	443	2.21e-140	437	alanyl-tRNA synthetase [Tupanvirus soda lake].	Tupanvirus soda lake	Viruses;Varidnaviria;Bamfordvirae;Nucleocytoviricota;Megaviricetes;Imitervirales;Mimiviridae;Megamimivirinae;Tupanvirus.	Mimiviridae	dsDNA
TRINITY_DN796_c0_g2_i8	YP_010781535.1	3531	49.227	453	211	7	397	1728	1	443	5.3e-141	437	alanyl-tRNA synthetase [Tupanvirus soda lake].	Tupanvirus soda lake	Viruses;Varidnaviria;Bamfordvirae;Nucleocytoviricota;Megaviricetes;Imitervirales;Mimiviridae;Megamimivirinae;Tupanvirus.	Mimiviridae	dsDNA
TRINITY_DN2196_c0_g1_i7	YP_010781535.1	3317	49.227	453	211	7	183	1514	1	443	1.85e-141	436	alanyl-tRNA synthetase [Tupanvirus soda lake].	Tupanvirus soda lake	Viruses;Varidnaviria;Bamfordvirae;Nucleocytoviricota;Megaviricetes;Imitervirales;Mimiviridae;Megamimivirinae;Tupanvirus.	Mimiviridae	dsDNA
TRINITY_DN2196_c0_g1_i10	YP_010802886.1	2260	40.397	453	212	12	111	1463	222	618	6.6e-89	295	GMP synthetase glutamine amidotransferase and ATP pyrophosphatasedomain protein [Fadolivirus algeromassiliense].	Fadolivirus algeromassiliense	Viruses;Varidnaviria;Bamfordvirae;Nucleocytoviricota;Megaviricetes;Imitervirales;Mimiviridae;Klosneuvirinae;Fadolivirus.	Mimiviridae	dsDNA
TRINITY_DN2196_c0_g1_i3	NP_048306.1	1986	57.395	453	188	3	405	1763	14	461	0	568	ORF MSV235 putative CPD photolyase, similar to Monodelphisdomestica GB:D31902 [Melanoplus sanguinipes entomopoxvirus].	Melanoplus sanguinipes entomopoxvirus	Viruses;Varidnaviria;Bamfordvirae;Nucleocytoviricota;Pokkesviricetes;Chitovirales;Poxviridae;Entomopoxvirinae;Deltaentomopoxvirus.	Poxviridae	dsDNA
TRINITY_DN119063_c0_g1_i15	NP_048306.1	1799	57.395	453	188	3	218	1576	14	461	0	565	ORF MSV235 putative CPD photolyase, similar to Monodelphisdomestica GB:D31902 [Melanoplus sanguinipes entomopoxvirus].	Melanoplus sanguinipes entomopoxvirus	Viruses;Varidnaviria;Bamfordvirae;Nucleocytoviricota;Pokkesviricetes;Chitovirales;Poxviridae;Entomopoxvirinae;Deltaentomopoxvirus.	Poxviridae	dsDNA
TRINITY_DN39365_c3_g1_i8	YP_003969699.1	1696	29.581	453	255	12	225	1547	219	619	1.02e-45	173	putative metalloendopeptidase [Cafeteria roenbergensis virusBV-PW1].	Cafeteria roenbergensis virus BV-PW1	Viruses;Varidnaviria;Bamfordvirae;Nucleocytoviricota;Megaviricetes;Imitervirales;Mimiviridae;Aliimimivirinae;Rheavirus;Rheavirussinusmexicani.	Mimiviridae	dsDNA
TRINITY_DN24789_c0_g1_i7	YP_010803101.1	1648	45.254	453	237	5	211	1557	139	584	3.77e-119	366	arginyl-tRNA synthetase [Fadolivirus algeromassiliense].	Fadolivirus algeromassiliense	Viruses;Varidnaviria;Bamfordvirae;Nucleocytoviricota;Megaviricetes;Imitervirales;Mimiviridae;Klosneuvirinae;Fadolivirus.	Mimiviridae	dsDNA
TRINITY_DN24789_c0_g1_i15	YP_009352567.1	5630	29.425	452	251	14	4085	2880	60	493	2.39e-41	164	Peroxinectin [Kaumoebavirus].	Kaumoebavirus	Viruses.	Viruses	unclassified viruses
TRINITY_DN75417_c0_g2_i4	YP_009352567.1	5618	29.425	452	251	14	4073	2868	60	493	2.38e-41	164	Peroxinectin [Kaumoebavirus].	Kaumoebavirus	Viruses.	Viruses	unclassified viruses
TRINITY_DN75417_c0_g2_i3	YP_009352567.1	5606	29.425	452	251	14	4061	2856	60	493	2.38e-41	164	Peroxinectin [Kaumoebavirus].	Kaumoebavirus	Viruses.	Viruses	unclassified viruses
TRINITY_DN144859_c2_g1_i5	YP_009352567.1	5594	29.425	452	251	14	4049	2844	60	493	2.37e-41	164	Peroxinectin [Kaumoebavirus].	Kaumoebavirus	Viruses.	Viruses	unclassified viruses
TRINITY_DN144859_c2_g1_i4	YP_009352567.1	4343	29.425	452	251	14	4073	2868	60	493	1.34e-41	164	Peroxinectin [Kaumoebavirus].	Kaumoebavirus	Viruses.	Viruses	unclassified viruses
TRINITY_DN76_c0_g1_i28	YP_004956814.1	2202	63.938	452	139	4	1840	500	2	434	0	594	orf66 gene product [Helicoverpa zea nudivirus 2].	Helicoverpa zea nudivirus 2	Viruses;Naldaviricetes;Lefavirales;Nudiviridae;Betanudivirus;Betanudivirushezeae.	Nudiviridae	dsDNA
TRINITY_DN76_c0_g1_i12	YP_628286.1	2468	63.193	451	155	5	1856	522	76	521	0	582	protein-tyrosine kinase [Y73 sarcoma virus].	Y73 sarcoma virus	Viruses;Riboviria;Pararnavirae;Artverviricota;Revtraviricetes;Ortervirales;Retroviridae;Orthoretrovirinae;Alpharetrovirus.	Retroviridae	ssRNA-RT
TRINITY_DN76_c0_g1_i18	YP_009172680.1	1987	30.377	451	257	14	1584	238	6	401	8.17e-49	179	dehydrogenase [Ostreococcus lucimarinus virus 2].	Ostreococcus lucimarinus virus 2	Viruses;Varidnaviria;Bamfordvirae;Nucleocytoviricota;Megaviricetes;Algavirales;Phycodnaviridae;Prasinovirus.	Phycodnaviridae	dsDNA
TRINITY_DN76_c0_g1_i29	YP_008052567.1	1962	34.59	451	279	7	245	1588	5	442	9.6e-83	270	aminopeptidase C [Phaeocystis globosa virus].	Phaeocystis globosa virus	Viruses;Varidnaviria;Bamfordvirae;Nucleocytoviricota;Megaviricetes;Algavirales;Phycodnaviridae;Prymnesiovirus.	Phycodnaviridae	dsDNA
TRINITY_DN76_c0_g1_i25	YP_004956816.1	1912	29.933	451	239	22	1626	454	273	706	2.01e-29	127	orf68 gene product [Helicoverpa zea nudivirus 2].	Helicoverpa zea nudivirus 2	Viruses;Naldaviricetes;Lefavirales;Nudiviridae;Betanudivirus;Betanudivirushezeae.	Nudiviridae	dsDNA
TRINITY_DN205_c0_g1_i3	YP_004956814.1	1809	53.437	451	187	5	225	1571	2	431	9.96e-166	482	orf66 gene product [Helicoverpa zea nudivirus 2].	Helicoverpa zea nudivirus 2	Viruses;Naldaviricetes;Lefavirales;Nudiviridae;Betanudivirus;Betanudivirushezeae.	Nudiviridae	dsDNA
TRINITY_DN205_c0_g1_i1	YP_009046239.1	1731	27.494	451	269	9	1535	195	31	427	3.22e-33	137	ankyrin repeat protein [Penguinpox virus].	Penguinpox virus	Viruses;Varidnaviria;Bamfordvirae;Nucleocytoviricota;Pokkesviricetes;Chitovirales;Poxviridae;Chordopoxvirinae;Avipoxvirus.	Poxviridae	dsDNA
TRINITY_DN47656_c0_g1_i9	YP_009552663.1	1586	28.381	451	312	9	1329	1	4	451	6.31e-52	187	EGT [Operophtera brumata nucleopolyhedrovirus].	Operophtera brumata nucleopolyhedrovirus	Viruses;Naldaviricetes;Lefavirales;Baculoviridae;Alphabaculovirus;Alphabaculovirusopbrumatae.	Baculoviridae	dsDNA
TRINITY_DN41694_c0_g1_i9	YP_004956814.1	1504	61.641	451	151	4	1456	116	2	434	0	550	orf66 gene product [Helicoverpa zea nudivirus 2].	Helicoverpa zea nudivirus 2	Viruses;Naldaviricetes;Lefavirales;Nudiviridae;Betanudivirus;Betanudivirushezeae.	Nudiviridae	dsDNA
TRINITY_DN41990_c0_g1_i2	YP_010803610.1	1477	28.381	451	279	14	68	1393	5	420	1.32e-42	160	deoxyribodipyrimidine photolyase [Fadolivirus algeromassiliense].	Fadolivirus algeromassiliense	Viruses;Varidnaviria;Bamfordvirae;Nucleocytoviricota;Megaviricetes;Imitervirales;Mimiviridae;Klosneuvirinae;Fadolivirus.	Mimiviridae	dsDNA
TRINITY_DN41990_c0_g1_i1	YP_009552663.1	1453	28.16	451	313	9	1329	1	4	451	2.37e-53	189	EGT [Operophtera brumata nucleopolyhedrovirus].	Operophtera brumata nucleopolyhedrovirus	Viruses;Naldaviricetes;Lefavirales;Baculoviridae;Alphabaculovirus;Alphabaculovirusopbrumatae.	Baculoviridae	dsDNA
TRINITY_DN41694_c0_g1_i10	YP_919062.1	1443	27.716	451	281	16	1417	89	12	425	1.61e-29	125	DNA helicase [Halorubrum virus BJ1].	Halorubrum virus BJ1	Viruses;Duplodnaviria;Heunggongvirae;Uroviricota;Caudoviricetes;Kirjokansivirales;Graaviviridae;Beejeyvirus;BeejeyvirusBJ1.	Graaviviridae	dsDNA
TRINITY_DN111635_c0_g2_i4	YP_009552663.1	1443	28.381	451	312	9	1329	1	4	451	2.24e-52	187	EGT [Operophtera brumata nucleopolyhedrovirus].	Operophtera brumata nucleopolyhedrovirus	Viruses;Naldaviricetes;Lefavirales;Baculoviridae;Alphabaculovirus;Alphabaculovirusopbrumatae.	Baculoviridae	dsDNA
TRINITY_DN76723_c0_g1_i12	YP_010789829.1	4005	22.222	450	266	15	2169	3362	24	441	6.45e-05	50.8	putative ubiquitin carboxyl-terminal hydrolase [Moumouvirusaustraliensis].	Moumouvirus australiensis	Viruses;Varidnaviria;Bamfordvirae;Nucleocytoviricota;Megaviricetes;Imitervirales;Mimiviridae;Megamimivirinae;Moumouvirus;Moumouvirusaustraliense.	Mimiviridae	dsDNA
TRINITY_DN76723_c0_g1_i20	YP_010789829.1	3652	22.222	450	266	15	1816	3009	24	441	5.79e-05	50.8	putative ubiquitin carboxyl-terminal hydrolase [Moumouvirusaustraliensis].	Moumouvirus australiensis	Viruses;Varidnaviria;Bamfordvirae;Nucleocytoviricota;Megaviricetes;Imitervirales;Mimiviridae;Megamimivirinae;Moumouvirus;Moumouvirusaustraliense.	Mimiviridae	dsDNA
TRINITY_DN4856_c1_g1_i5	YP_010789829.1	3364	22.222	450	266	15	1528	2721	24	441	5.25e-05	50.8	putative ubiquitin carboxyl-terminal hydrolase [Moumouvirusaustraliensis].	Moumouvirus australiensis	Viruses;Varidnaviria;Bamfordvirae;Nucleocytoviricota;Megaviricetes;Imitervirales;Mimiviridae;Megamimivirinae;Moumouvirus;Moumouvirusaustraliense.	Mimiviridae	dsDNA
TRINITY_DN4856_c1_g1_i6	YP_010789829.1	3285	22.222	450	266	15	1816	3009	24	441	5.11e-05	50.8	putative ubiquitin carboxyl-terminal hydrolase [Moumouvirusaustraliensis].	Moumouvirus australiensis	Viruses;Varidnaviria;Bamfordvirae;Nucleocytoviricota;Megaviricetes;Imitervirales;Mimiviridae;Megamimivirinae;Moumouvirus;Moumouvirusaustraliense.	Mimiviridae	dsDNA
TRINITY_DN5078_c0_g3_i4	YP_010781689.1	2994	49.333	450	194	5	1478	2758	86	524	6.41e-141	434	prolyl-tRNA synthetase [Tupanvirus soda lake].	Tupanvirus soda lake	Viruses;Varidnaviria;Bamfordvirae;Nucleocytoviricota;Megaviricetes;Imitervirales;Mimiviridae;Megamimivirinae;Tupanvirus.	Mimiviridae	dsDNA
TRINITY_DN7438_c0_g1_i3	YP_009173627.1	2600	29.556	450	271	13	2314	986	106	516	2e-42	168	Hsp70 protein [Chrysochromulina ericina virus].	Chrysochromulina ericina virus	Viruses;Varidnaviria;Bamfordvirae;Nucleocytoviricota;Megaviricetes;Algavirales;Phycodnaviridae.	Phycodnaviridae	dsDNA
TRINITY_DN7438_c0_g1_i11	YP_010778587.1	2565	27.333	450	280	10	1873	560	6	420	1.03e-38	153	deoxyribodipyrimidine photo-lyase [Bodo saltans virus].	Bodo saltans virus	Viruses;Varidnaviria;Bamfordvirae;Nucleocytoviricota;Megaviricetes;Imitervirales;Mimiviridae;Klosneuvirinae;Theiavirus;Theiavirussalishense.	Mimiviridae	dsDNA
TRINITY_DN39005_c0_g1_i1	YP_010778587.1	2435	27.333	450	280	10	1873	560	6	420	8.38e-39	153	deoxyribodipyrimidine photo-lyase [Bodo saltans virus].	Bodo saltans virus	Viruses;Varidnaviria;Bamfordvirae;Nucleocytoviricota;Megaviricetes;Imitervirales;Mimiviridae;Klosneuvirinae;Theiavirus;Theiavirussalishense.	Mimiviridae	dsDNA
TRINITY_DN6670_c0_g1_i12	YP_010778587.1	2211	27.333	450	280	10	1873	560	6	420	5.72e-39	153	deoxyribodipyrimidine photo-lyase [Bodo saltans virus].	Bodo saltans virus	Viruses;Varidnaviria;Bamfordvirae;Nucleocytoviricota;Megaviricetes;Imitervirales;Mimiviridae;Klosneuvirinae;Theiavirus;Theiavirussalishense.	Mimiviridae	dsDNA
TRINITY_DN111470_c0_g1_i3	YP_009046239.1	3150	31.403	449	262	10	546	1862	16	428	2.51e-45	177	ankyrin repeat protein [Penguinpox virus].	Penguinpox virus	Viruses;Varidnaviria;Bamfordvirae;Nucleocytoviricota;Pokkesviricetes;Chitovirales;Poxviridae;Chordopoxvirinae;Avipoxvirus.	Poxviridae	dsDNA
TRINITY_DN194994_c0_g1_i1	YP_009046239.1	3087	31.403	449	262	10	483	1799	16	428	2.39e-45	177	ankyrin repeat protein [Penguinpox virus].	Penguinpox virus	Viruses;Varidnaviria;Bamfordvirae;Nucleocytoviricota;Pokkesviricetes;Chitovirales;Poxviridae;Chordopoxvirinae;Avipoxvirus.	Poxviridae	dsDNA
TRINITY_DN25948_c0_g1_i20	YP_009046239.1	3002	31.403	449	262	10	398	1714	16	428	2.22e-45	177	ankyrin repeat protein [Penguinpox virus].	Penguinpox virus	Viruses;Varidnaviria;Bamfordvirae;Nucleocytoviricota;Pokkesviricetes;Chitovirales;Poxviridae;Chordopoxvirinae;Avipoxvirus.	Poxviridae	dsDNA
TRINITY_DN1487_c0_g1_i4	YP_009046239.1	2939	31.403	449	262	10	335	1651	16	428	2.08e-45	177	ankyrin repeat protein [Penguinpox virus].	Penguinpox virus	Viruses;Varidnaviria;Bamfordvirae;Nucleocytoviricota;Pokkesviricetes;Chitovirales;Poxviridae;Chordopoxvirinae;Avipoxvirus.	Poxviridae	dsDNA
TRINITY_DN1487_c0_g1_i9	YP_009046239.1	2911	31.403	449	262	10	335	1651	16	428	2.3e-45	177	ankyrin repeat protein [Penguinpox virus].	Penguinpox virus	Viruses;Varidnaviria;Bamfordvirae;Nucleocytoviricota;Pokkesviricetes;Chitovirales;Poxviridae;Chordopoxvirinae;Avipoxvirus.	Poxviridae	dsDNA
TRINITY_DN7027_c0_g1_i8	YP_009046239.1	2211	31.403	449	262	10	335	1651	16	428	6.47e-46	177	ankyrin repeat protein [Penguinpox virus].	Penguinpox virus	Viruses;Varidnaviria;Bamfordvirae;Nucleocytoviricota;Pokkesviricetes;Chitovirales;Poxviridae;Chordopoxvirinae;Avipoxvirus.	Poxviridae	dsDNA
TRINITY_DN1487_c0_g1_i11	YP_009046239.1	2035	31.403	449	262	10	335	1651	16	428	3.5e-46	177	ankyrin repeat protein [Penguinpox virus].	Penguinpox virus	Viruses;Varidnaviria;Bamfordvirae;Nucleocytoviricota;Pokkesviricetes;Chitovirales;Poxviridae;Chordopoxvirinae;Avipoxvirus.	Poxviridae	dsDNA
TRINITY_DN1487_c0_g1_i6	YP_009165762.1	1835	26.786	448	277	14	79	1347	43	464	1.41e-27	120	hypothetical protein APL35_gp011 [Apis mellifera filamentousvirus].	Apis mellifera filamentous virus	Viruses.	Viruses	unclassified viruses
TRINITY_DN2704_c0_g2_i10	YP_007354613.1	4315	33.705	448	252	8	3206	1983	24	466	1.2e-69	245	asparaginyl t-RNA synthetase [Acanthamoeba polyphaga moumouvirus].	Acanthamoeba polyphaga moumouvirus	Viruses;Varidnaviria;Bamfordvirae;Nucleocytoviricota;Megaviricetes;Imitervirales;Mimiviridae;Megamimivirinae;Moumouvirus.	Mimiviridae	dsDNA
TRINITY_DN549_c0_g1_i3	YP_010778405.1	3957	44.866	448	242	5	2244	3578	6	451	2.23e-123	393	adenylosuccinate lyase [Bodo saltans virus].	Bodo saltans virus	Viruses;Varidnaviria;Bamfordvirae;Nucleocytoviricota;Megaviricetes;Imitervirales;Mimiviridae;Klosneuvirinae;Theiavirus;Theiavirussalishense.	Mimiviridae	dsDNA
TRINITY_DN23523_c0_g5_i1	YP_009483772.1	4099	29.53	447	298	13	1023	2336	8	446	5.25e-45	173	Bifunctional metallophosphatase5-nucleotidase [Pandoravirusquercus].	Pandoravirus quercus	Viruses;Pandoravirus.	Pandoravirus	dsDNA
TRINITY_DN4808_c0_g1_i23	YP_009483772.1	3807	29.53	447	298	13	731	2044	8	446	6.03e-45	173	Bifunctional metallophosphatase5-nucleotidase [Pandoravirusquercus].	Pandoravirus quercus	Viruses;Pandoravirus.	Pandoravirus	dsDNA
TRINITY_DN399_c0_g1_i1	YP_009551698.1	3110	22.371	447	269	20	1515	223	1440	1824	5.13e-12	74.3	putative replicase polyprotein [Yichang virus].	Yichang virus	Viruses;Riboviria;Orthornavirae;Pisuviricota;Pisoniviricetes;Nidovirales;Mesnidovirineae;Mesoniviridae;Hexponivirinae;Alphamesonivirus;Yilivirus;Alphamesonivirus11.	Mesoniviridae	ssRNA(+)
TRINITY_DN24678_c0_g1_i18	NP_955616.1	2534	42.729	447	241	9	866	2188	84	521	7.7e-112	354	pp60 SRC [Rous sarcoma virus]	Rous sarcoma virus	Viruses; Riboviria; Pararnavirae; Artverviricota; Revtraviricetes;Ortervirales; Retroviridae; Orthoretrovirinae; Alpharetrovirus.	Retroviridae	ss-RNA
TRINITY_DN9917_c0_g1_i5	NP_955616.1	2474	42.729	447	241	9	806	2128	84	521	6.21e-112	354	pp60 SRC [Rous sarcoma virus]	Rous sarcoma virus	Viruses; Riboviria; Pararnavirae; Artverviricota; Revtraviricetes;Ortervirales; Retroviridae; Orthoretrovirinae; Alpharetrovirus.	Retroviridae	ss-RNA
TRINITY_DN24678_c0_g1_i12	YP_009001225.1	2040	21.029	447	292	13	1861	572	222	624	8.27e-13	75.1	ABC transporter [Pithovirus sibericum].	Pithovirus sibericum	Viruses;Pithoviruses;Pithovirus.	Pithovirus	dsDNA
TRINITY_DN9917_c0_g1_i23	YP_009448636.1	2007	23.714	447	274	8	1460	141	71	457	2.74e-27	119	Cytochrome P450-like protein E-class [Orpheovirus IHUMI-LCC2].	Orpheovirus IHUMI-LCC2	Viruses;Varidnaviria;Bamfordvirae;Nucleocytoviricota;Megaviricetes;Algavirales;Phycodnaviridae.	Phycodnaviridae	dsDNA
TRINITY_DN24678_c0_g1_i19	YP_009448811.1	1832	31.991	447	269	13	304	1578	2	435	2.47e-54	194	Serine-tRNA synthetase, type1 [Orpheovirus IHUMI-LCC2].	Orpheovirus IHUMI-LCC2	Viruses;Varidnaviria;Bamfordvirae;Nucleocytoviricota;Megaviricetes;Algavirales;Phycodnaviridae.	Phycodnaviridae	dsDNA
TRINITY_DN9917_c0_g1_i15	YP_009551698.1	1797	22.148	447	270	20	1515	223	1440	1824	1.59e-12	74.7	putative replicase polyprotein [Yichang virus].	Yichang virus	Viruses;Riboviria;Orthornavirae;Pisuviricota;Pisoniviricetes;Nidovirales;Mesnidovirineae;Mesoniviridae;Hexponivirinae;Alphamesonivirus;Yilivirus;Alphamesonivirus11.	Mesoniviridae	ssRNA(+)
TRINITY_DN9917_c0_g1_i21	YP_009173627.1	1624	71.812	447	124	2	1435	98	2	447	0	612	Hsp70 protein [Chrysochromulina ericina virus].	Chrysochromulina ericina virus	Viruses;Varidnaviria;Bamfordvirae;Nucleocytoviricota;Megaviricetes;Algavirales;Phycodnaviridae.	Phycodnaviridae	dsDNA
TRINITY_DN9917_c0_g1_i26	YP_010796961.1	1445	29.821	446	264	13	142	1407	107	527	8.08e-43	166	PolB [Mayetiola barley midge adintovirus].	Mayetiola barley midge adintovirus	Viruses;Varidnaviria;Bamfordvirae;Preplasmiviricota;Polintoviricetes;Orthopolintovirales;Adintoviridae;Alphadintovirus;Alphadintovirusmayetiola.	Adintoviridae	dsDNA
TRINITY_DN6833_c2_g2_i5	YP_004061896.1	3571	44.494	445	225	9	1540	2856	144	572	1.49e-106	350	hypothetical protein MpV1_013c [Micromonas sp. RCC1109 virus MpV1].	Micromonas sp. RCC1109 virus MpV1	Viruses;Varidnaviria;Bamfordvirae;Nucleocytoviricota;Megaviricetes;Algavirales;Phycodnaviridae;Prasinovirus.	Phycodnaviridae	dsDNA
TRINITY_DN73103_c1_g1_i6	YP_004061896.1	3133	44.719	445	224	9	1102	2418	144	572	5.03e-108	351	hypothetical protein MpV1_013c [Micromonas sp. RCC1109 virus MpV1].	Micromonas sp. RCC1109 virus MpV1	Viruses;Varidnaviria;Bamfordvirae;Nucleocytoviricota;Megaviricetes;Algavirales;Phycodnaviridae;Prasinovirus.	Phycodnaviridae	dsDNA
TRINITY_DN21977_c0_g1_i11	YP_004061896.1	2827	43.596	445	229	8	796	2112	144	572	4.66e-106	344	hypothetical protein MpV1_013c [Micromonas sp. RCC1109 virus MpV1].	Micromonas sp. RCC1109 virus MpV1	Viruses;Varidnaviria;Bamfordvirae;Nucleocytoviricota;Megaviricetes;Algavirales;Phycodnaviridae;Prasinovirus.	Phycodnaviridae	dsDNA
TRINITY_DN10481_c1_g1_i2	YP_004061896.1	2604	44.494	445	225	9	573	1889	144	572	4.39e-109	350	hypothetical protein MpV1_013c [Micromonas sp. RCC1109 virus MpV1].	Micromonas sp. RCC1109 virus MpV1	Viruses;Varidnaviria;Bamfordvirae;Nucleocytoviricota;Megaviricetes;Algavirales;Phycodnaviridae;Prasinovirus.	Phycodnaviridae	dsDNA
TRINITY_DN7311_c0_g1_i32	YP_009666148.1	1988	25.169	445	249	10	629	1954	5	368	1.39e-33	135	hypothetical protein FLA14_p101 [Diachasmimorpha longicaudataentomopoxvirus].	Diachasmimorpha longicaudata entomopoxvirus	Viruses;Varidnaviria;Bamfordvirae;Nucleocytoviricota;Pokkesviricetes;Chitovirales;Poxviridae;Entomopoxvirinae;Diachasmimorphaentomopoxvirus.	Poxviridae	dsDNA
TRINITY_DN4298_c0_g1_i3	YP_010778630.1	6770	27.477	444	248	18	5166	3967	20	433	4.7e-23	110	DEXDc helicase [Bodo saltans virus].	Bodo saltans virus	Viruses;Varidnaviria;Bamfordvirae;Nucleocytoviricota;Megaviricetes;Imitervirales;Mimiviridae;Klosneuvirinae;Theiavirus;Theiavirussalishense.	Mimiviridae	dsDNA
TRINITY_DN4298_c0_g1_i2	YP_009177124.1	6269	27.477	444	282	6	5593	4271	153	559	3.73e-25	117	ankyrin repeat family protein [Turkeypox virus].	Turkeypox virus	Viruses;Varidnaviria;Bamfordvirae;Nucleocytoviricota;Pokkesviricetes;Chitovirales;Poxviridae;Chordopoxvirinae;Avipoxvirus.	Poxviridae	dsDNA
TRINITY_DN50247_c0_g1_i3	YP_009177124.1	6203	27.477	444	282	6	5527	4205	153	559	3.68e-25	117	ankyrin repeat family protein [Turkeypox virus].	Turkeypox virus	Viruses;Varidnaviria;Bamfordvirae;Nucleocytoviricota;Pokkesviricetes;Chitovirales;Poxviridae;Chordopoxvirinae;Avipoxvirus.	Poxviridae	dsDNA
TRINITY_DN1241_c0_g1_i11	YP_009177124.1	6095	27.477	444	282	6	5419	4097	153	559	3.6e-25	117	ankyrin repeat family protein [Turkeypox virus].	Turkeypox virus	Viruses;Varidnaviria;Bamfordvirae;Nucleocytoviricota;Pokkesviricetes;Chitovirales;Poxviridae;Chordopoxvirinae;Avipoxvirus.	Poxviridae	dsDNA
TRINITY_DN7082_c0_g1_i13	YP_009177124.1	6011	27.477	444	282	6	5335	4013	153	559	2.04e-25	118	ankyrin repeat family protein [Turkeypox virus].	Turkeypox virus	Viruses;Varidnaviria;Bamfordvirae;Nucleocytoviricota;Pokkesviricetes;Chitovirales;Poxviridae;Chordopoxvirinae;Avipoxvirus.	Poxviridae	dsDNA
TRINITY_DN83571_c0_g1_i2	YP_009177124.1	5780	27.477	444	282	6	5104	3782	153	559	3.35e-25	117	ankyrin repeat family protein [Turkeypox virus].	Turkeypox virus	Viruses;Varidnaviria;Bamfordvirae;Nucleocytoviricota;Pokkesviricetes;Chitovirales;Poxviridae;Chordopoxvirinae;Avipoxvirus.	Poxviridae	dsDNA
TRINITY_DN7082_c0_g1_i23	YP_010778630.1	4663	27.477	444	248	18	3059	1860	20	433	2.86e-23	110	DEXDc helicase [Bodo saltans virus].	Bodo saltans virus	Viruses;Varidnaviria;Bamfordvirae;Nucleocytoviricota;Megaviricetes;Imitervirales;Mimiviridae;Klosneuvirinae;Theiavirus;Theiavirussalishense.	Mimiviridae	dsDNA
TRINITY_DN1522_c2_g1_i3	YP_009177124.1	3571	27.477	444	282	6	2895	1573	153	559	8.66e-26	118	ankyrin repeat family protein [Turkeypox virus].	Turkeypox virus	Viruses;Varidnaviria;Bamfordvirae;Nucleocytoviricota;Pokkesviricetes;Chitovirales;Poxviridae;Chordopoxvirinae;Avipoxvirus.	Poxviridae	dsDNA
TRINITY_DN796_c0_g2_i4	YP_611073.1	1687	25.676	444	289	11	1367	87	28	447	3.22e-36	144	global transactivator [Antheraea pernyi nucleopolyhedrovirus].	Antheraea pernyi nucleopolyhedrovirus	Viruses;Naldaviricetes;Lefavirales;Baculoviridae;Alphabaculovirus;Alphabaculovirusanpernyi.	Baculoviridae	dsDNA
TRINITY_DN27056_c0_g2_i13	YP_009329403.1	1615	29.73	444	273	12	1390	86	12	425	2.75e-52	190	ABC transporter, partial [Cedratvirus A11].	Cedratvirus A11	Viruses;Pithoviruses.	Pithoviruses	dsDNA
TRINITY_DN13852_c0_g1_i5	YP_010803214.1	3046	30.474	443	250	9	2359	1121	43	457	4.97e-54	200	GTP binding translation elongation factor [Fadolivirusalgeromassiliense].	Fadolivirus algeromassiliense	Viruses;Varidnaviria;Bamfordvirae;Nucleocytoviricota;Megaviricetes;Imitervirales;Mimiviridae;Klosneuvirinae;Fadolivirus.	Mimiviridae	dsDNA
TRINITY_DN15882_c0_g1_i3	YP_010803214.1	2870	30.474	443	250	9	2359	1121	43	457	6.34e-54	199	GTP binding translation elongation factor [Fadolivirusalgeromassiliense].	Fadolivirus algeromassiliense	Viruses;Varidnaviria;Bamfordvirae;Nucleocytoviricota;Megaviricetes;Imitervirales;Mimiviridae;Klosneuvirinae;Fadolivirus.	Mimiviridae	dsDNA
TRINITY_DN450_c0_g1_i27	YP_010803214.1	2596	30.474	443	250	9	2359	1121	43	457	1.06e-53	198	GTP binding translation elongation factor [Fadolivirusalgeromassiliense].	Fadolivirus algeromassiliense	Viruses;Varidnaviria;Bamfordvirae;Nucleocytoviricota;Megaviricetes;Imitervirales;Mimiviridae;Klosneuvirinae;Fadolivirus.	Mimiviridae	dsDNA
TRINITY_DN450_c0_g1_i39	YP_009448636.1	2088	23.928	443	270	8	1541	234	71	453	1.67e-27	119	Cytochrome P450-like protein E-class [Orpheovirus IHUMI-LCC2].	Orpheovirus IHUMI-LCC2	Viruses;Varidnaviria;Bamfordvirae;Nucleocytoviricota;Megaviricetes;Algavirales;Phycodnaviridae.	Phycodnaviridae	dsDNA
TRINITY_DN450_c0_g1_i16	YP_009448636.1	1801	24.153	443	258	14	352	1611	71	458	4.51e-26	115	Cytochrome P450-like protein E-class [Orpheovirus IHUMI-LCC2].	Orpheovirus IHUMI-LCC2	Viruses;Varidnaviria;Bamfordvirae;Nucleocytoviricota;Megaviricetes;Algavirales;Phycodnaviridae.	Phycodnaviridae	dsDNA
TRINITY_DN6428_c1_g1_i11	YP_009448636.1	1801	24.153	443	258	14	352	1611	71	458	4.63e-26	115	Cytochrome P450-like protein E-class [Orpheovirus IHUMI-LCC2].	Orpheovirus IHUMI-LCC2	Viruses;Varidnaviria;Bamfordvirae;Nucleocytoviricota;Megaviricetes;Algavirales;Phycodnaviridae.	Phycodnaviridae	dsDNA
TRINITY_DN11897_c1_g1_i5	YP_009352567.1	3387	30.543	442	238	13	1575	403	60	483	2.8e-43	168	Peroxinectin [Kaumoebavirus].	Kaumoebavirus	Viruses.	Viruses	unclassified viruses
TRINITY_DN11897_c1_g1_i16	YP_009352567.1	3079	30.543	442	238	13	1267	95	60	483	2.39e-43	168	Peroxinectin [Kaumoebavirus].	Kaumoebavirus	Viruses.	Viruses	unclassified viruses
TRINITY_DN11897_c1_g1_i14	YP_009448636.1	3288	23.982	442	300	13	2855	1566	5	422	4.18e-09	63.9	Cytochrome P450-like protein E-class [Orpheovirus IHUMI-LCC2].	Orpheovirus IHUMI-LCC2	Viruses;Varidnaviria;Bamfordvirae;Nucleocytoviricota;Megaviricetes;Algavirales;Phycodnaviridae.	Phycodnaviridae	dsDNA
TRINITY_DN11897_c1_g1_i4	YP_009046239.1	3170	28.054	442	272	13	2864	1602	31	447	7.64e-31	133	ankyrin repeat protein [Penguinpox virus].	Penguinpox virus	Viruses;Varidnaviria;Bamfordvirae;Nucleocytoviricota;Pokkesviricetes;Chitovirales;Poxviridae;Chordopoxvirinae;Avipoxvirus.	Poxviridae	dsDNA
TRINITY_DN6428_c1_g1_i21	YP_009448636.1	3067	23.982	442	300	13	2855	1566	5	422	2.72e-09	64.3	Cytochrome P450-like protein E-class [Orpheovirus IHUMI-LCC2].	Orpheovirus IHUMI-LCC2	Viruses;Varidnaviria;Bamfordvirae;Nucleocytoviricota;Megaviricetes;Algavirales;Phycodnaviridae.	Phycodnaviridae	dsDNA
TRINITY_DN6428_c1_g1_i5	YP_009448636.1	1707	26.244	442	271	16	213	1490	19	421	4.01e-18	90.9	Cytochrome P450-like protein E-class [Orpheovirus IHUMI-LCC2].	Orpheovirus IHUMI-LCC2	Viruses;Varidnaviria;Bamfordvirae;Nucleocytoviricota;Megaviricetes;Algavirales;Phycodnaviridae.	Phycodnaviridae	dsDNA
TRINITY_DN6428_c1_g1_i26	YP_010803819.1	6132	25.624	441	277	13	2504	1203	271	667	1.02e-27	125	phosphatidylinositol kinase [Fadolivirus algeromassiliense].	Fadolivirus algeromassiliense	Viruses;Varidnaviria;Bamfordvirae;Nucleocytoviricota;Megaviricetes;Imitervirales;Mimiviridae;Klosneuvirinae;Fadolivirus.	Mimiviridae	dsDNA
TRINITY_DN16724_c0_g9_i1	YP_010803819.1	6098	25.624	441	277	13	2504	1203	271	667	1.01e-27	125	phosphatidylinositol kinase [Fadolivirus algeromassiliense].	Fadolivirus algeromassiliense	Viruses;Varidnaviria;Bamfordvirae;Nucleocytoviricota;Megaviricetes;Imitervirales;Mimiviridae;Klosneuvirinae;Fadolivirus.	Mimiviridae	dsDNA
TRINITY_DN105823_c0_g1_i2	YP_010803819.1	5318	25.624	441	277	13	1724	423	271	667	7.19e-28	125	phosphatidylinositol kinase [Fadolivirus algeromassiliense].	Fadolivirus algeromassiliense	Viruses;Varidnaviria;Bamfordvirae;Nucleocytoviricota;Megaviricetes;Imitervirales;Mimiviridae;Klosneuvirinae;Fadolivirus.	Mimiviridae	dsDNA
TRINITY_DN4733_c0_g1_i20	YP_009165762.1	3869	28.798	441	260	18	3720	2461	43	450	4e-29	127	hypothetical protein APL35_gp011 [Apis mellifera filamentousvirus].	Apis mellifera filamentous virus	Viruses.	Viruses	unclassified viruses
TRINITY_DN92728_c0_g2_i5	YP_009165762.1	3803	28.798	441	260	18	3654	2395	43	450	3.89e-29	127	hypothetical protein APL35_gp011 [Apis mellifera filamentousvirus].	Apis mellifera filamentous virus	Viruses.	Viruses	unclassified viruses
TRINITY_DN33775_c0_g1_i1	YP_009165054.1	1559	32.2	441	238	16	276	1472	2	423	4.71e-42	160	Amidophosphoribosyltransferase [Mollivirus sibericum].	Mollivirus sibericum	Viruses.	Viruses	unclassified viruses
TRINITY_DN64021_c1_g1_i3	YP_010803819.1	4579	25.624	441	277	13	2504	1203	271	667	6.79e-28	125	phosphatidylinositol kinase [Fadolivirus algeromassiliense].	Fadolivirus algeromassiliense	Viruses;Varidnaviria;Bamfordvirae;Nucleocytoviricota;Megaviricetes;Imitervirales;Mimiviridae;Klosneuvirinae;Fadolivirus.	Mimiviridae	dsDNA
TRINITY_DN64021_c1_g1_i1	YP_010783088.1	1898	26.077	441	269	19	1640	429	3	423	2.1e-14	79.7	arylsulfatase [Tetraselmis virus 1].	Tetraselmis virus 1	Viruses;Varidnaviria;Bamfordvirae;Nucleocytoviricota;Megaviricetes;Imitervirales;Allomimiviridae;Oceanusvirus;Oceanusviruskaneohense.	Allomimiviridae	dsDNA
TRINITY_DN6413_c0_g1_i1	YP_009352567.1	4855	29.091	440	245	13	3172	4350	46	465	1.22e-36	149	Peroxinectin [Kaumoebavirus].	Kaumoebavirus	Viruses.	Viruses	unclassified viruses
TRINITY_DN7247_c0_g1_i12	YP_009352567.1	3289	29.091	440	245	13	1606	2784	46	465	8.4e-37	149	Peroxinectin [Kaumoebavirus].	Kaumoebavirus	Viruses.	Viruses	unclassified viruses
TRINITY_DN5880_c0_g3_i1	YP_009408106.1	1947	26.136	440	285	8	1349	138	14	449	2.05e-40	158	BTB kelch-domain protein [Eptesipox virus].	Eptesipox virus	Viruses;Varidnaviria;Bamfordvirae;Nucleocytoviricota;Pokkesviricetes;Chitovirales;Poxviridae;Chordopoxvirinae;Vespertilionpoxvirus.	Poxviridae	dsDNA
TRINITY_DN673_c0_g1_i6	NP_073525.1	1757	20.682	440	302	10	1667	390	34	440	2.33e-19	95.1	140R protein [Yaba-like disease virus].	Yaba-like disease virus	Viruses;Varidnaviria;Bamfordvirae;Nucleocytoviricota;Pokkesviricetes;Chitovirales;Poxviridae;Chordopoxvirinae;Yatapoxvirus;Tanapoxvirus.	Poxviridae	dsDNA
TRINITY_DN673_c0_g1_i9	YP_010803569.1	3522	34.852	439	236	10	2189	903	89	487	9.89e-67	237	cysteinyl-tRNA synthetase [Fadolivirus algeromassiliense].	Fadolivirus algeromassiliense	Viruses;Varidnaviria;Bamfordvirae;Nucleocytoviricota;Megaviricetes;Imitervirales;Mimiviridae;Klosneuvirinae;Fadolivirus.	Mimiviridae	dsDNA
TRINITY_DN52801_c0_g1_i1	YP_010803569.1	3152	34.852	439	236	10	2189	903	89	487	3.99e-67	237	cysteinyl-tRNA synthetase [Fadolivirus algeromassiliense].	Fadolivirus algeromassiliense	Viruses;Varidnaviria;Bamfordvirae;Nucleocytoviricota;Megaviricetes;Imitervirales;Mimiviridae;Klosneuvirinae;Fadolivirus.	Mimiviridae	dsDNA
TRINITY_DN325810_c0_g1_i1	YP_010803569.1	3070	34.852	439	236	10	2189	903	89	487	4.32e-67	237	cysteinyl-tRNA synthetase [Fadolivirus algeromassiliense].	Fadolivirus algeromassiliense	Viruses;Varidnaviria;Bamfordvirae;Nucleocytoviricota;Megaviricetes;Imitervirales;Mimiviridae;Klosneuvirinae;Fadolivirus.	Mimiviridae	dsDNA
TRINITY_DN7727_c0_g1_i4	YP_009173653.1	3063	39.863	439	238	8	138	1397	1015	1446	2.97e-91	323	DNA-directed RNA polymerase II, subunit RpB1 [Chrysochromulinaericina virus].	Chrysochromulina ericina virus	Viruses;Varidnaviria;Bamfordvirae;Nucleocytoviricota;Megaviricetes;Algavirales;Phycodnaviridae.	Phycodnaviridae	dsDNA
TRINITY_DN21182_c0_g1_i2	YP_628286.1	2539	43.508	439	235	8	871	2169	85	516	3.89e-112	357	protein-tyrosine kinase [Y73 sarcoma virus].	Y73 sarcoma virus	Viruses;Riboviria;Pararnavirae;Artverviricota;Revtraviricetes;Ortervirales;Retroviridae;Orthoretrovirinae;Alpharetrovirus.	Retroviridae	ssRNA-RT
TRINITY_DN21177_c3_g1_i4	YP_009664587.1	2318	26.879	439	247	15	1651	356	26	397	3.54e-21	100	ORF47 [white sturgeon herpesvirus 2].	white sturgeon herpesvirus 2	Viruses;Duplodnaviria;Heunggongvirae;Peploviricota;Herviviricetes;Herpesvirales;Alloherpesviridae;Ictavirus;Ictavirusacipenseridallo2.	Alloherpesviridae	dsDNA
TRINITY_DN232562_c0_g1_i1	YP_009664587.1	2138	26.879	439	247	15	1651	356	26	397	2.75e-21	100	ORF47 [white sturgeon herpesvirus 2].	white sturgeon herpesvirus 2	Viruses;Duplodnaviria;Heunggongvirae;Peploviricota;Herviviricetes;Herpesvirales;Alloherpesviridae;Ictavirus;Ictavirusacipenseridallo2.	Alloherpesviridae	dsDNA
TRINITY_DN21177_c3_g1_i3	YP_611073.1	6238	26.484	438	280	11	4236	2968	52	462	4.72e-38	154	global transactivator [Antheraea pernyi nucleopolyhedrovirus].	Antheraea pernyi nucleopolyhedrovirus	Viruses;Naldaviricetes;Lefavirales;Baculoviridae;Alphabaculovirus;Alphabaculovirusanpernyi.	Baculoviridae	dsDNA
TRINITY_DN61900_c0_g1_i14	YP_611073.1	5769	26.484	438	280	11	4236	2968	52	462	4.29e-38	154	global transactivator [Antheraea pernyi nucleopolyhedrovirus].	Antheraea pernyi nucleopolyhedrovirus	Viruses;Naldaviricetes;Lefavirales;Baculoviridae;Alphabaculovirus;Alphabaculovirusanpernyi.	Baculoviridae	dsDNA
TRINITY_DN4998_c0_g2_i8	YP_009337188.1	4634	39.269	438	235	10	3118	1820	3	414	5.45e-80	275	hypothetical protein 2 [Sanxia tombus-like virus 5].	Sanxia tombus-like virus 5	Viruses;Riboviria.	Riboviria	unclassified Riboviria
TRINITY_DN9004_c0_g2_i3	YP_009046239.1	2712	31.735	438	253	10	141	1424	27	428	4.07e-45	176	ankyrin repeat protein [Penguinpox virus].	Penguinpox virus	Viruses;Varidnaviria;Bamfordvirae;Nucleocytoviricota;Pokkesviricetes;Chitovirales;Poxviridae;Chordopoxvirinae;Avipoxvirus.	Poxviridae	dsDNA
TRINITY_DN33775_c0_g1_i2	YP_010804038.1	2588	30.365	438	276	8	424	1713	35	451	3.38e-46	175	L-lysine 6-transaminase [Fadolivirus algeromassiliense].	Fadolivirus algeromassiliense	Viruses;Varidnaviria;Bamfordvirae;Nucleocytoviricota;Megaviricetes;Imitervirales;Mimiviridae;Klosneuvirinae;Fadolivirus.	Mimiviridae	dsDNA
TRINITY_DN2338_c2_g1_i18	YP_010776614.1	2056	36.301	438	235	9	156	1415	133	544	1.04e-86	285	methionyl-tRNA synthetase [Powai lake megavirus].	Powai lake megavirus	Viruses;Varidnaviria;Bamfordvirae;Nucleocytoviricota;Megaviricetes;Imitervirales;Mimiviridae;Megamimivirinae;Megavirus;Megaviruspowaiense.	Mimiviridae	dsDNA
TRINITY_DN2338_c2_g1_i21	YP_010783088.1	1817	26.027	438	267	19	1631	429	6	423	3.28e-13	75.9	arylsulfatase [Tetraselmis virus 1].	Tetraselmis virus 1	Viruses;Varidnaviria;Bamfordvirae;Nucleocytoviricota;Megaviricetes;Imitervirales;Allomimiviridae;Oceanusvirus;Oceanusviruskaneohense.	Allomimiviridae	dsDNA
TRINITY_DN12792_c0_g1_i11	YP_010776614.1	1735	36.301	438	235	9	156	1415	133	544	7.01e-88	285	methionyl-tRNA synthetase [Powai lake megavirus].	Powai lake megavirus	Viruses;Varidnaviria;Bamfordvirae;Nucleocytoviricota;Megaviricetes;Imitervirales;Mimiviridae;Megamimivirinae;Megavirus;Megaviruspowaiense.	Mimiviridae	dsDNA
TRINITY_DN12907_c0_g1_i12	YP_010781133.1	6275	35.24	437	233	8	4317	5495	26	456	7.87e-89	301	cysteine desulfurase sufS family [Tupanvirus deep ocean].	Tupanvirus deep ocean	Viruses;Varidnaviria;Bamfordvirae;Nucleocytoviricota;Megaviricetes;Imitervirales;Mimiviridae;Megamimivirinae;Tupanvirus.	Mimiviridae	dsDNA
TRINITY_DN12792_c0_g1_i3	YP_010781133.1	6274	35.24	437	233	8	4317	5495	26	456	7.87e-89	301	cysteine desulfurase sufS family [Tupanvirus deep ocean].	Tupanvirus deep ocean	Viruses;Varidnaviria;Bamfordvirae;Nucleocytoviricota;Megaviricetes;Imitervirales;Mimiviridae;Megamimivirinae;Tupanvirus.	Mimiviridae	dsDNA
TRINITY_DN12792_c0_g1_i8	YP_009177124.1	8911	28.67	436	263	9	8325	7051	161	559	6.24e-28	127	ankyrin repeat family protein [Turkeypox virus].	Turkeypox virus	Viruses;Varidnaviria;Bamfordvirae;Nucleocytoviricota;Pokkesviricetes;Chitovirales;Poxviridae;Chordopoxvirinae;Avipoxvirus.	Poxviridae	dsDNA
TRINITY_DN72627_c0_g1_i5	YP_009177124.1	8797	28.67	436	263	9	8211	6937	161	559	6.14e-28	127	ankyrin repeat family protein [Turkeypox virus].	Turkeypox virus	Viruses;Varidnaviria;Bamfordvirae;Nucleocytoviricota;Pokkesviricetes;Chitovirales;Poxviridae;Chordopoxvirinae;Avipoxvirus.	Poxviridae	dsDNA
TRINITY_DN12907_c0_g1_i11	YP_009177124.1	8179	28.67	436	263	9	7593	6319	161	559	5.62e-28	127	ankyrin repeat family protein [Turkeypox virus].	Turkeypox virus	Viruses;Varidnaviria;Bamfordvirae;Nucleocytoviricota;Pokkesviricetes;Chitovirales;Poxviridae;Chordopoxvirinae;Avipoxvirus.	Poxviridae	dsDNA
TRINITY_DN12792_c0_g1_i2	YP_009177124.1	8065	28.67	436	263	9	7479	6205	161	559	5.52e-28	127	ankyrin repeat family protein [Turkeypox virus].	Turkeypox virus	Viruses;Varidnaviria;Bamfordvirae;Nucleocytoviricota;Pokkesviricetes;Chitovirales;Poxviridae;Chordopoxvirinae;Avipoxvirus.	Poxviridae	dsDNA
TRINITY_DN72627_c0_g1_i2	YP_001427077.1	7049	27.523	436	219	21	5194	4010	28	407	3.24e-21	104	Holliday junction branch migration helicase [Chlorovirusheliozoae].	Chlorovirus heliozoae	Viruses;Varidnaviria;Bamfordvirae;Nucleocytoviricota;Megaviricetes;Algavirales;Phycodnaviridae;Chlorovirus.	Phycodnaviridae	dsDNA
TRINITY_DN444_c0_g2_i3	YP_009177124.1	6697	28.67	436	263	9	6111	4837	161	559	4.36e-28	127	ankyrin repeat family protein [Turkeypox virus].	Turkeypox virus	Viruses;Varidnaviria;Bamfordvirae;Nucleocytoviricota;Pokkesviricetes;Chitovirales;Poxviridae;Chordopoxvirinae;Avipoxvirus.	Poxviridae	dsDNA
TRINITY_DN444_c0_g2_i2	YP_009177124.1	6062	28.67	436	263	9	5476	4202	161	559	3.82e-28	127	ankyrin repeat family protein [Turkeypox virus].	Turkeypox virus	Viruses;Varidnaviria;Bamfordvirae;Nucleocytoviricota;Pokkesviricetes;Chitovirales;Poxviridae;Chordopoxvirinae;Avipoxvirus.	Poxviridae	dsDNA
TRINITY_DN846_c0_g1_i1	YP_009177124.1	3195	24.312	436	268	15	1466	180	42	422	1.82e-08	62.4	ankyrin repeat family protein [Turkeypox virus].	Turkeypox virus	Viruses;Varidnaviria;Bamfordvirae;Nucleocytoviricota;Pokkesviricetes;Chitovirales;Poxviridae;Chordopoxvirinae;Avipoxvirus.	Poxviridae	dsDNA
TRINITY_DN119573_c1_g1_i1	YP_008438851.2	2931	20.872	436	304	14	1485	229	79	490	1.75e-11	71.2	Aspartate aminotransferase [Pandoravirus salinus].	Pandoravirus salinus	Viruses;Pandoravirus.	Pandoravirus	dsDNA
TRINITY_DN3099_c0_g1_i11	YP_002296164.1	2235	40.596	436	231	6	1694	402	29	441	2.67e-99	328	putative serine palmitoyltransferase [Emiliania huxleyi virus 86]	Emiliania huxleyi virus 86	Viruses; Varidnaviria; Bamfordvirae; Nucleocytoviricota;Megaviricetes; Algavirales; Phycodnaviridae; Coccolithovirus.	Phycodnaviridae	dsDNA
TRINITY_DN3099_c0_g1_i10	YP_010803171.1	1950	38.532	436	254	9	1455	172	14	443	9.36e-96	305	histidyl-tRNA synthetase [Fadolivirus algeromassiliense].	Fadolivirus algeromassiliense	Viruses;Varidnaviria;Bamfordvirae;Nucleocytoviricota;Megaviricetes;Imitervirales;Mimiviridae;Klosneuvirinae;Fadolivirus.	Mimiviridae	dsDNA
TRINITY_DN1530_c0_g1_i30	YP_010803171.1	1940	38.532	436	254	9	1455	172	14	443	8.44e-96	305	histidyl-tRNA synthetase [Fadolivirus algeromassiliense].	Fadolivirus algeromassiliense	Viruses;Varidnaviria;Bamfordvirae;Nucleocytoviricota;Megaviricetes;Imitervirales;Mimiviridae;Klosneuvirinae;Fadolivirus.	Mimiviridae	dsDNA
TRINITY_DN3736_c0_g1_i20	YP_010803171.1	1732	38.532	436	254	9	1455	172	14	443	1.51e-96	304	histidyl-tRNA synthetase [Fadolivirus algeromassiliense].	Fadolivirus algeromassiliense	Viruses;Varidnaviria;Bamfordvirae;Nucleocytoviricota;Megaviricetes;Imitervirales;Mimiviridae;Klosneuvirinae;Fadolivirus.	Mimiviridae	dsDNA
TRINITY_DN1530_c0_g1_i28	YP_010776614.1	3815	36.552	435	238	9	156	1415	133	544	3.35e-83	286	methionyl-tRNA synthetase [Powai lake megavirus].	Powai lake megavirus	Viruses;Varidnaviria;Bamfordvirae;Nucleocytoviricota;Megaviricetes;Imitervirales;Mimiviridae;Megamimivirinae;Megavirus;Megaviruspowaiense.	Mimiviridae	dsDNA
TRINITY_DN3736_c0_g1_i40	YP_010778630.1	3172	33.333	435	242	5	2892	1621	71	468	3.91e-71	256	DEXDc helicase [Bodo saltans virus].	Bodo saltans virus	Viruses;Varidnaviria;Bamfordvirae;Nucleocytoviricota;Megaviricetes;Imitervirales;Mimiviridae;Klosneuvirinae;Theiavirus;Theiavirussalishense.	Mimiviridae	dsDNA
TRINITY_DN1530_c0_g1_i11	NP_612245.1	6926	25.576	434	224	21	5656	4496	199	580	0.005	45.8	ORF023R [Infectious spleen and kidney necrosis virus].	Infectious spleen and kidney necrosis virus	Viruses;Varidnaviria;Bamfordvirae;Nucleocytoviricota;Megaviricetes;Pimascovirales;Iridoviridae;Alphairidovirinae;Megalocytivirus.	Iridoviridae	dsDNA
TRINITY_DN3736_c0_g1_i38	NP_612245.1	6344	25.576	434	224	21	5656	4496	199	580	0.023	43.5	ORF023R [Infectious spleen and kidney necrosis virus].	Infectious spleen and kidney necrosis virus	Viruses;Varidnaviria;Bamfordvirae;Nucleocytoviricota;Megaviricetes;Pimascovirales;Iridoviridae;Alphairidovirinae;Megalocytivirus.	Iridoviridae	dsDNA
TRINITY_DN3736_c0_g1_i25	YP_009165762.1	3440	26.959	434	268	14	202	1452	43	444	5.38e-32	136	hypothetical protein APL35_gp011 [Apis mellifera filamentousvirus].	Apis mellifera filamentous virus	Viruses.	Viruses	unclassified viruses
TRINITY_DN3736_c0_g1_i11	YP_009165762.1	3396	26.959	434	268	14	202	1452	43	444	5.27e-32	136	hypothetical protein APL35_gp011 [Apis mellifera filamentousvirus].	Apis mellifera filamentous virus	Viruses.	Viruses	unclassified viruses
TRINITY_DN3736_c0_g1_i27	YP_009352567.1	1773	28.571	434	233	12	1204	65	52	462	1.51e-39	154	Peroxinectin [Kaumoebavirus].	Kaumoebavirus	Viruses.	Viruses	unclassified viruses
TRINITY_DN7082_c0_g1_i2	YP_009352567.1	1448	28.571	434	233	12	1204	65	52	462	2.58e-40	154	Peroxinectin [Kaumoebavirus].	Kaumoebavirus	Viruses.	Viruses	unclassified viruses
TRINITY_DN7082_c0_g1_i17	YP_009165762.1	6795	28.868	433	233	18	6477	5269	43	430	1.66e-24	114	hypothetical protein APL35_gp011 [Apis mellifera filamentousvirus].	Apis mellifera filamentous virus	Viruses.	Viruses	unclassified viruses
TRINITY_DN3736_c0_g1_i37	YP_009165762.1	6729	28.868	433	233	18	6411	5203	43	430	1.64e-24	114	hypothetical protein APL35_gp011 [Apis mellifera filamentousvirus].	Apis mellifera filamentous virus	Viruses.	Viruses	unclassified viruses
TRINITY_DN187777_c0_g2_i1	YP_009165762.1	5776	28.868	433	233	18	5458	4250	43	430	1.36e-24	114	hypothetical protein APL35_gp011 [Apis mellifera filamentousvirus].	Apis mellifera filamentous virus	Viruses.	Viruses	unclassified viruses
TRINITY_DN7082_c0_g1_i28	YP_009165762.1	5710	28.868	433	233	18	5392	4184	43	430	1.34e-24	114	hypothetical protein APL35_gp011 [Apis mellifera filamentousvirus].	Apis mellifera filamentous virus	Viruses.	Viruses	unclassified viruses
TRINITY_DN2338_c2_g1_i36	YP_009165762.1	4728	28.868	433	233	18	4410	3202	43	430	1.04e-24	114	hypothetical protein APL35_gp011 [Apis mellifera filamentousvirus].	Apis mellifera filamentous virus	Viruses.	Viruses	unclassified viruses
TRINITY_DN27056_c0_g2_i1	YP_009361727.1	1667	27.714	433	247	13	242	1363	2	427	1.62e-36	144	Cysteine desulfurase NifS [Pacmanvirus A23].	Pacmanvirus A23	Viruses.	Viruses	unclassified viruses
TRINITY_DN2142_c0_g2_i1	YP_009361727.1	1532	23.326	433	221	14	242	1228	2	427	1.74e-17	88.2	Cysteine desulfurase NifS [Pacmanvirus A23].	Pacmanvirus A23	Viruses.	Viruses	unclassified viruses
TRINITY_DN15121_c0_g1_i10	YP_009165762.1	2383	23.611	432	229	16	268	1527	33	375	1.18e-15	84.3	hypothetical protein APL35_gp011 [Apis mellifera filamentousvirus].	Apis mellifera filamentous virus	Viruses.	Viruses	unclassified viruses
TRINITY_DN15121_c0_g1_i39	YP_010803626.1	4175	24.306	432	273	14	2318	1074	458	852	8.81e-16	86.7	P-type ATPase subfamily IV [Fadolivirus algeromassiliense].	Fadolivirus algeromassiliense	Viruses;Varidnaviria;Bamfordvirae;Nucleocytoviricota;Megaviricetes;Imitervirales;Mimiviridae;Klosneuvirinae;Fadolivirus.	Mimiviridae	dsDNA
TRINITY_DN24873_c0_g1_i11	YP_010778845.1	4123	20.602	432	305	18	3413	2166	18	427	9.6e-08	60.1	leucine rich repeat protein [Bodo saltans virus].	Bodo saltans virus	Viruses;Varidnaviria;Bamfordvirae;Nucleocytoviricota;Megaviricetes;Imitervirales;Mimiviridae;Klosneuvirinae;Theiavirus;Theiavirussalishense.	Mimiviridae	dsDNA
TRINITY_DN22278_c0_g1_i1	YP_010778845.1	3971	20.602	432	305	18	3261	2014	18	427	9.18e-08	60.1	leucine rich repeat protein [Bodo saltans virus].	Bodo saltans virus	Viruses;Varidnaviria;Bamfordvirae;Nucleocytoviricota;Megaviricetes;Imitervirales;Mimiviridae;Klosneuvirinae;Theiavirus;Theiavirussalishense.	Mimiviridae	dsDNA
TRINITY_DN25824_c0_g1_i5	YP_010803626.1	3740	24.306	432	273	14	2318	1074	458	852	7.57e-16	86.7	P-type ATPase subfamily IV [Fadolivirus algeromassiliense].	Fadolivirus algeromassiliense	Viruses;Varidnaviria;Bamfordvirae;Nucleocytoviricota;Megaviricetes;Imitervirales;Mimiviridae;Klosneuvirinae;Fadolivirus.	Mimiviridae	dsDNA
TRINITY_DN25824_c0_g1_i1	YP_002321389.1	2741	33.333	432	240	14	705	1952	9	408	2.05e-68	237	semaphorin-like protein [Oryctes rhinoceros nudivirus].	Oryctes rhinoceros nudivirus	Viruses;Naldaviricetes;Lefavirales;Nudiviridae;Alphanudivirus;Alphanudivirusoryrhinocerotis.	Nudiviridae	dsDNA
TRINITY_DN441_c0_g1_i17	YP_004956771.1	2710	24.769	432	301	11	297	1544	6	429	1.04e-23	109	orf23 gene product [Helicoverpa zea nudivirus 2].	Helicoverpa zea nudivirus 2	Viruses;Naldaviricetes;Lefavirales;Nudiviridae;Betanudivirus;Betanudivirushezeae.	Nudiviridae	dsDNA
TRINITY_DN441_c0_g1_i16	YP_004956771.1	2647	24.769	432	301	11	297	1544	6	429	6.03e-24	110	orf23 gene product [Helicoverpa zea nudivirus 2].	Helicoverpa zea nudivirus 2	Viruses;Naldaviricetes;Lefavirales;Nudiviridae;Betanudivirus;Betanudivirushezeae.	Nudiviridae	dsDNA
TRINITY_DN25824_c0_g1_i13	YP_009329403.1	2253	31.481	432	258	12	1914	661	29	436	2.8e-56	206	ABC transporter, partial [Cedratvirus A11].	Cedratvirus A11	Viruses;Pithoviruses.	Pithoviruses	dsDNA
TRINITY_DN441_c0_g1_i1	YP_009329403.1	1852	31.481	432	258	12	1513	260	29	436	4.77e-57	205	ABC transporter, partial [Cedratvirus A11].	Cedratvirus A11	Viruses;Pithoviruses.	Pithoviruses	dsDNA
TRINITY_DN441_c0_g1_i10	YP_009238667.1	2357	38.747	431	236	11	1646	378	3	413	1.48e-80	267	translation elongation factor [Brazilian marseillevirus].	Brazilian marseillevirus	Viruses;Varidnaviria;Bamfordvirae;Nucleocytoviricota;Megaviricetes;Pimascovirales;Marseilleviridae;Marseillevirus.	Marseilleviridae	dsDNA
TRINITY_DN6982_c0_g3_i2	YP_009448636.1	2296	23.666	431	275	16	474	1739	51	436	2.81e-17	89	Cytochrome P450-like protein E-class [Orpheovirus IHUMI-LCC2].	Orpheovirus IHUMI-LCC2	Viruses;Varidnaviria;Bamfordvirae;Nucleocytoviricota;Megaviricetes;Algavirales;Phycodnaviridae.	Phycodnaviridae	dsDNA
TRINITY_DN6982_c0_g3_i8	YP_009448636.1	2192	23.666	431	275	16	370	1635	51	436	2.6e-17	89	Cytochrome P450-like protein E-class [Orpheovirus IHUMI-LCC2].	Orpheovirus IHUMI-LCC2	Viruses;Varidnaviria;Bamfordvirae;Nucleocytoviricota;Megaviricetes;Algavirales;Phycodnaviridae.	Phycodnaviridae	dsDNA
TRINITY_DN39453_c0_g1_i1	YP_010777388.1	2045	41.299	431	218	11	1826	585	1	413	8.91e-73	248	glutamine-dependent asparagine synthetase [Acanthamoeba polyphagamimivirus].	Acanthamoeba polyphaga mimivirus	Viruses;Varidnaviria;Bamfordvirae;Nucleocytoviricota;Megaviricetes;Imitervirales;Mimiviridae;Megamimivirinae;Mimivirus;Mimivirusbradfordmassiliense.	Mimiviridae	dsDNA
TRINITY_DN2135_c0_g1_i8	YP_010804160.1	1754	20.65	431	274	11	311	1471	68	474	5.01e-13	75.5	long-chain fatty acid CoA synthetase [Fadolivirusalgeromassiliense].	Fadolivirus algeromassiliense	Viruses;Varidnaviria;Bamfordvirae;Nucleocytoviricota;Megaviricetes;Imitervirales;Mimiviridae;Klosneuvirinae;Fadolivirus.	Mimiviridae	dsDNA
TRINITY_DN16075_c0_g1_i1	YP_009448636.1	1537	26.218	431	266	15	56	1303	28	421	4.93e-24	108	Cytochrome P450-like protein E-class [Orpheovirus IHUMI-LCC2].	Orpheovirus IHUMI-LCC2	Viruses;Varidnaviria;Bamfordvirae;Nucleocytoviricota;Megaviricetes;Algavirales;Phycodnaviridae.	Phycodnaviridae	dsDNA
TRINITY_DN20382_c0_g1_i4	NP_612245.1	4011	26.744	430	226	25	2433	1309	185	580	0.24	39.7	ORF023R [Infectious spleen and kidney necrosis virus].	Infectious spleen and kidney necrosis virus	Viruses;Varidnaviria;Bamfordvirae;Nucleocytoviricota;Megaviricetes;Pimascovirales;Iridoviridae;Alphairidovirinae;Megalocytivirus.	Iridoviridae	dsDNA
TRINITY_DN1135_c1_g1_i7	YP_010779322.1	2609	30.93	430	206	15	313	1362	257	675	1.02e-31	135	oxidoreductase [Moumouvirus goulette].	Moumouvirus goulette	Viruses;Varidnaviria;Bamfordvirae;Nucleocytoviricota;Megaviricetes;Imitervirales;Mimiviridae;Megamimivirinae;Moumouvirus;Moumouvirusgoulettemassiliense.	Mimiviridae	dsDNA
TRINITY_DN94824_c0_g1_i8	YP_001497339.1	2474	33.953	430	250	11	1599	331	191	593	4.87e-62	223	hypothetical protein NY2A_B143R [Paramecium bursaria Chlorellavirus NY2A].	Paramecium bursaria Chlorella virus NY2A	Viruses;Varidnaviria;Bamfordvirae;Nucleocytoviricota;Megaviricetes;Algavirales;Phycodnaviridae;Chlorovirus.	Phycodnaviridae	dsDNA
TRINITY_DN796_c0_g2_i2	YP_001497339.1	2450	33.953	430	250	11	1599	331	191	593	3.52e-62	223	hypothetical protein NY2A_B143R [Paramecium bursaria Chlorellavirus NY2A].	Paramecium bursaria Chlorella virus NY2A	Viruses;Varidnaviria;Bamfordvirae;Nucleocytoviricota;Megaviricetes;Algavirales;Phycodnaviridae;Chlorovirus.	Phycodnaviridae	dsDNA
TRINITY_DN94824_c0_g1_i3	YP_010781718.1	2245	37.674	430	248	5	577	1857	125	537	1.76e-90	296	ATP binding cassette sub family F [Tupanvirus soda lake].	Tupanvirus soda lake	Viruses;Varidnaviria;Bamfordvirae;Nucleocytoviricota;Megaviricetes;Imitervirales;Mimiviridae;Megamimivirinae;Tupanvirus.	Mimiviridae	dsDNA
TRINITY_DN49531_c0_g1_i2	YP_001497339.1	1906	33.953	430	250	11	1599	331	191	593	1.7e-63	223	hypothetical protein NY2A_B143R [Paramecium bursaria Chlorellavirus NY2A].	Paramecium bursaria Chlorella virus NY2A	Viruses;Varidnaviria;Bamfordvirae;Nucleocytoviricota;Megaviricetes;Algavirales;Phycodnaviridae;Chlorovirus.	Phycodnaviridae	dsDNA
TRINITY_DN7142_c0_g1_i2	YP_001497339.1	1840	33.953	430	250	11	1599	331	191	593	8.62e-64	223	hypothetical protein NY2A_B143R [Paramecium bursaria Chlorellavirus NY2A].	Paramecium bursaria Chlorella virus NY2A	Viruses;Varidnaviria;Bamfordvirae;Nucleocytoviricota;Megaviricetes;Algavirales;Phycodnaviridae;Chlorovirus.	Phycodnaviridae	dsDNA
TRINITY_DN20291_c0_g1_i8	YP_009551698.1	3698	21.678	429	259	16	1240	2460	1442	1815	1.9e-07	59.7	putative replicase polyprotein [Yichang virus].	Yichang virus	Viruses;Riboviria;Orthornavirae;Pisuviricota;Pisoniviricetes;Nidovirales;Mesnidovirineae;Mesoniviridae;Hexponivirinae;Alphamesonivirus;Yilivirus;Alphamesonivirus11.	Mesoniviridae	ssRNA(+)
TRINITY_DN979_c0_g1_i8	YP_010780645.1	2625	44.755	429	225	6	1940	669	176	597	3.09e-114	367	catalase HPII [Tupanvirus deep ocean].	Tupanvirus deep ocean	Viruses;Varidnaviria;Bamfordvirae;Nucleocytoviricota;Megaviricetes;Imitervirales;Mimiviridae;Megamimivirinae;Tupanvirus.	Mimiviridae	dsDNA
TRINITY_DN188124_c0_g2_i4	YP_010783088.1	2487	26.34	429	246	15	305	1465	6	406	3.23e-22	104	arylsulfatase [Tetraselmis virus 1].	Tetraselmis virus 1	Viruses;Varidnaviria;Bamfordvirae;Nucleocytoviricota;Megaviricetes;Imitervirales;Allomimiviridae;Oceanusvirus;Oceanusviruskaneohense.	Allomimiviridae	dsDNA
TRINITY_DN68746_c0_g1_i13	YP_010777010.1	2167	27.273	429	261	15	978	2165	89	499	1.56e-18	94	putative ankyrin repeat protein [Acanthamoeba polyphaga mimivirus].	Acanthamoeba polyphaga mimivirus	Viruses;Varidnaviria;Bamfordvirae;Nucleocytoviricota;Megaviricetes;Imitervirales;Mimiviridae;Megamimivirinae;Mimivirus;Mimivirusbradfordmassiliense.	Mimiviridae	dsDNA
TRINITY_DN188124_c0_g2_i1	YP_010780181.1	1815	34.033	429	240	13	1569	313	174	569	1.57e-66	218	hypothetical protein QJ856_gp1184 [Tupanvirus deep ocean].	Tupanvirus deep ocean	Viruses;Varidnaviria;Bamfordvirae;Nucleocytoviricota;Megaviricetes;Imitervirales;Mimiviridae;Megamimivirinae;Tupanvirus.	Mimiviridae	dsDNA
TRINITY_DN21182_c0_g1_i7	YP_009352567.1	4664	28.505	428	229	13	1209	2336	60	462	1.25e-39	158	Peroxinectin [Kaumoebavirus].	Kaumoebavirus	Viruses.	Viruses	unclassified viruses
TRINITY_DN59971_c0_g1_i1	YP_009352567.1	4296	30.607	428	256	13	1570	392	63	484	1.21e-43	170	Peroxinectin [Kaumoebavirus].	Kaumoebavirus	Viruses.	Viruses	unclassified viruses
TRINITY_DN6428_c1_g1_i32	YP_010800379.1	4331	25.467	428	227	15	1744	2991	1187	1534	1.96e-12	76.3	putative replicase [Frankliniella occidentalis associatedmesonivirus 1].	Frankliniella occidentalis associated mesonivirus 1	Viruses;Riboviria;Orthornavirae;Pisuviricota;Pisoniviricetes;Nidovirales;Mesnidovirineae;Mesoniviridae;Metotonivirinae;Tofonivirus;Fomevirus;Tofonivirusfoami.	Mesoniviridae	ssRNA(+)
TRINITY_DN105823_c0_g1_i5	YP_009352567.1	3752	30.607	428	256	13	1570	392	63	484	1e-43	170	Peroxinectin [Kaumoebavirus].	Kaumoebavirus	Viruses.	Viruses	unclassified viruses
TRINITY_DN452816_c0_g1_i2	YP_010800379.1	4276	25.467	428	227	15	1641	2888	1187	1534	2.08e-12	76.3	putative replicase [Frankliniella occidentalis associatedmesonivirus 1].	Frankliniella occidentalis associated mesonivirus 1	Viruses;Riboviria;Orthornavirae;Pisuviricota;Pisoniviricetes;Nidovirales;Mesnidovirineae;Mesoniviridae;Metotonivirinae;Tofonivirus;Fomevirus;Tofonivirusfoami.	Mesoniviridae	ssRNA(+)
TRINITY_DN24789_c0_g1_i16	YP_009352567.1	1901	30.607	428	256	13	1822	644	63	484	3.9e-45	171	Peroxinectin [Kaumoebavirus].	Kaumoebavirus	Viruses.	Viruses	unclassified viruses
TRINITY_DN10257_c0_g2_i11	YP_010800379.1	4228	25.467	428	227	15	1641	2888	1187	1534	1.9e-12	76.3	putative replicase [Frankliniella occidentalis associatedmesonivirus 1].	Frankliniella occidentalis associated mesonivirus 1	Viruses;Riboviria;Orthornavirae;Pisuviricota;Pisoniviricetes;Nidovirales;Mesnidovirineae;Mesoniviridae;Metotonivirinae;Tofonivirus;Fomevirus;Tofonivirusfoami.	Mesoniviridae	ssRNA(+)
TRINITY_DN10257_c0_g2_i12	YP_010800379.1	4139	25.467	428	227	15	1552	2799	1187	1534	1.85e-12	76.3	putative replicase [Frankliniella occidentalis associatedmesonivirus 1].	Frankliniella occidentalis associated mesonivirus 1	Viruses;Riboviria;Orthornavirae;Pisuviricota;Pisoniviricetes;Nidovirales;Mesnidovirineae;Mesoniviridae;Metotonivirinae;Tofonivirus;Fomevirus;Tofonivirusfoami.	Mesoniviridae	ssRNA(+)
TRINITY_DN10257_c0_g2_i8	YP_010800379.1	3363	25.467	428	227	15	776	2023	1187	1534	1.35e-12	76.3	putative replicase [Frankliniella occidentalis associatedmesonivirus 1].	Frankliniella occidentalis associated mesonivirus 1	Viruses;Riboviria;Orthornavirae;Pisuviricota;Pisoniviricetes;Nidovirales;Mesnidovirineae;Mesoniviridae;Metotonivirinae;Tofonivirus;Fomevirus;Tofonivirusfoami.	Mesoniviridae	ssRNA(+)
TRINITY_DN10257_c0_g2_i3	YP_010084515.1	3318	23.598	428	293	9	1988	780	7	425	2.32e-28	122	equilibrative nucleoside transporter 1 isoform X1 [Harp sealherpesvirus].	Harp seal herpesvirus	Viruses;Duplodnaviria;Heunggongvirae;Peploviricota;Herviviricetes;Herpesvirales;Orthoherpesviridae;Gammaherpesvirinae;Percavirus;Percavirusphocidgamma3.	Orthoherpesviridae	dsDNA
TRINITY_DN10257_c0_g2_i4	YP_009325872.1	3105	23.364	428	252	10	1426	320	10	420	9.12e-19	95.5	SerThr protein phosphatase 6 regulatory ankyrin repeat subunit Blike [Only Syngen Nebraska virus 5].	Only Syngen Nebraska virus 5	Viruses;Varidnaviria;Bamfordvirae;Nucleocytoviricota;Megaviricetes;Algavirales;Phycodnaviridae;Chlorovirus.	Phycodnaviridae	dsDNA
TRINITY_DN2680_c1_g1_i1	YP_010841542.1	5878	37.939	427	211	5	2213	3493	493	865	8.41e-17	90.9	collagen-like protein [Cotonvirus japonicus].	Cotonvirus japonicus	Viruses;Varidnaviria;Bamfordvirae;Nucleocytoviricota;Megaviricetes;Imitervirales;Mimiviridae;Megamimivirinae;Cotonvirus;Cotonvirusjaponicum.	Mimiviridae	dsDNA
TRINITY_DN9205_c1_g1_i13	YP_010778845.1	2396	26.464	427	264	3	649	1926	27	404	9.63e-45	172	leucine rich repeat protein [Bodo saltans virus].	Bodo saltans virus	Viruses;Varidnaviria;Bamfordvirae;Nucleocytoviricota;Megaviricetes;Imitervirales;Mimiviridae;Klosneuvirinae;Theiavirus;Theiavirussalishense.	Mimiviridae	dsDNA
TRINITY_DN126625_c0_g1_i1	YP_004956814.1	1870	52.225	427	181	5	358	1632	26	431	1.42e-151	447	orf66 gene product [Helicoverpa zea nudivirus 2].	Helicoverpa zea nudivirus 2	Viruses;Naldaviricetes;Lefavirales;Nudiviridae;Betanudivirus;Betanudivirushezeae.	Nudiviridae	dsDNA
TRINITY_DN2249_c0_g1_i3	YP_010782519.1	4605	37.324	426	221	6	3374	4516	26	450	1.9e-71	250	aminotransferase [Tupanvirus soda lake].	Tupanvirus soda lake	Viruses;Varidnaviria;Bamfordvirae;Nucleocytoviricota;Megaviricetes;Imitervirales;Mimiviridae;Megamimivirinae;Tupanvirus.	Mimiviridae	dsDNA
TRINITY_DN3086_c9_g1_i7	YP_010841796.1	3792	32.16	426	251	15	2741	1470	105	494	2.37e-52	196	putative ankyrin repeat protein [Cotonvirus japonicus].	Cotonvirus japonicus	Viruses;Varidnaviria;Bamfordvirae;Nucleocytoviricota;Megaviricetes;Imitervirales;Mimiviridae;Megamimivirinae;Cotonvirus;Cotonvirusjaponicum.	Mimiviridae	dsDNA
TRINITY_DN0_c492_g2_i1	YP_010803290.1	3766	29.577	426	227	15	3600	2383	1	373	7.42e-38	154	5-3 exoribonuclease [Fadolivirus algeromassiliense].	Fadolivirus algeromassiliense	Viruses;Varidnaviria;Bamfordvirae;Nucleocytoviricota;Megaviricetes;Imitervirales;Mimiviridae;Klosneuvirinae;Fadolivirus.	Mimiviridae	dsDNA
TRINITY_DN17939_c0_g1_i2	YP_010803290.1	2869	29.577	426	227	15	2703	1486	1	373	4.4e-38	154	5-3 exoribonuclease [Fadolivirus algeromassiliense].	Fadolivirus algeromassiliense	Viruses;Varidnaviria;Bamfordvirae;Nucleocytoviricota;Megaviricetes;Imitervirales;Mimiviridae;Klosneuvirinae;Fadolivirus.	Mimiviridae	dsDNA
TRINITY_DN242_c0_g1_i13	YP_293894.1	2132	40.141	426	224	14	845	2053	1	418	1.38e-72	244	helicase [Emiliania huxleyi virus 86].	Emiliania huxleyi virus 86	Viruses;Varidnaviria;Bamfordvirae;Nucleocytoviricota;Megaviricetes;Algavirales;Phycodnaviridae;Coccolithovirus.	Phycodnaviridae	dsDNA
TRINITY_DN242_c0_g1_i8	YP_010782239.1	2068	34.038	426	244	12	1742	501	1	401	3.81e-51	195	putative ATP-citrate synthase [Tupanvirus soda lake].	Tupanvirus soda lake	Viruses;Varidnaviria;Bamfordvirae;Nucleocytoviricota;Megaviricetes;Imitervirales;Mimiviridae;Megamimivirinae;Tupanvirus.	Mimiviridae	dsDNA
TRINITY_DN242_c0_g1_i28	YP_009482268.1	1399	22.77	426	225	12	148	1353	31	376	1.62e-12	72.8	Zinc-finger domain containing protein [Pandoravirus neocaledonia].	Pandoravirus neocaledonia	Viruses;Pandoravirus.	Pandoravirus	dsDNA
TRINITY_DN242_c0_g1_i19	YP_009046239.1	3150	32	425	262	13	1338	2573	16	426	8.54e-40	160	ankyrin repeat protein [Penguinpox virus].	Penguinpox virus	Viruses;Varidnaviria;Bamfordvirae;Nucleocytoviricota;Pokkesviricetes;Chitovirales;Poxviridae;Chordopoxvirinae;Avipoxvirus.	Poxviridae	dsDNA
TRINITY_DN242_c0_g1_i23	YP_009046239.1	3150	29.882	425	269	12	1449	2678	18	428	2.96e-36	149	ankyrin repeat protein [Penguinpox virus].	Penguinpox virus	Viruses;Varidnaviria;Bamfordvirae;Nucleocytoviricota;Pokkesviricetes;Chitovirales;Poxviridae;Chordopoxvirinae;Avipoxvirus.	Poxviridae	dsDNA
TRINITY_DN3683_c0_g1_i6	YP_009046239.1	3087	32	425	262	13	1275	2510	16	426	8.2e-40	160	ankyrin repeat protein [Penguinpox virus].	Penguinpox virus	Viruses;Varidnaviria;Bamfordvirae;Nucleocytoviricota;Pokkesviricetes;Chitovirales;Poxviridae;Chordopoxvirinae;Avipoxvirus.	Poxviridae	dsDNA
TRINITY_DN32515_c0_g1_i3	YP_009046239.1	3087	29.882	425	269	12	1386	2615	18	428	2.85e-36	149	ankyrin repeat protein [Penguinpox virus].	Penguinpox virus	Viruses;Varidnaviria;Bamfordvirae;Nucleocytoviricota;Pokkesviricetes;Chitovirales;Poxviridae;Chordopoxvirinae;Avipoxvirus.	Poxviridae	dsDNA
TRINITY_DN32515_c0_g1_i8	YP_009046239.1	3002	32	425	262	13	1190	2425	16	426	7.73e-40	160	ankyrin repeat protein [Penguinpox virus].	Penguinpox virus	Viruses;Varidnaviria;Bamfordvirae;Nucleocytoviricota;Pokkesviricetes;Chitovirales;Poxviridae;Chordopoxvirinae;Avipoxvirus.	Poxviridae	dsDNA
TRINITY_DN29534_c0_g2_i5	YP_009046239.1	3002	29.882	425	269	12	1301	2530	18	428	2.7e-36	149	ankyrin repeat protein [Penguinpox virus].	Penguinpox virus	Viruses;Varidnaviria;Bamfordvirae;Nucleocytoviricota;Pokkesviricetes;Chitovirales;Poxviridae;Chordopoxvirinae;Avipoxvirus.	Poxviridae	dsDNA
TRINITY_DN6515_c0_g1_i2	YP_009046239.1	2939	32	425	262	13	1127	2362	16	426	7.37e-40	160	ankyrin repeat protein [Penguinpox virus].	Penguinpox virus	Viruses;Varidnaviria;Bamfordvirae;Nucleocytoviricota;Pokkesviricetes;Chitovirales;Poxviridae;Chordopoxvirinae;Avipoxvirus.	Poxviridae	dsDNA
TRINITY_DN29534_c0_g2_i16	YP_009046239.1	2939	29.882	425	269	12	1238	2467	18	428	2.58e-36	149	ankyrin repeat protein [Penguinpox virus].	Penguinpox virus	Viruses;Varidnaviria;Bamfordvirae;Nucleocytoviricota;Pokkesviricetes;Chitovirales;Poxviridae;Chordopoxvirinae;Avipoxvirus.	Poxviridae	dsDNA
TRINITY_DN29534_c0_g2_i15	YP_009046239.1	2712	32	425	262	13	900	2135	16	426	5.92e-40	160	ankyrin repeat protein [Penguinpox virus].	Penguinpox virus	Viruses;Varidnaviria;Bamfordvirae;Nucleocytoviricota;Pokkesviricetes;Chitovirales;Poxviridae;Chordopoxvirinae;Avipoxvirus.	Poxviridae	dsDNA
TRINITY_DN84604_c0_g1_i5	YP_009046239.1	2712	29.882	425	269	12	1011	2240	18	428	1.84e-36	150	ankyrin repeat protein [Penguinpox virus].	Penguinpox virus	Viruses;Varidnaviria;Bamfordvirae;Nucleocytoviricota;Pokkesviricetes;Chitovirales;Poxviridae;Chordopoxvirinae;Avipoxvirus.	Poxviridae	dsDNA
TRINITY_DN14680_c0_g1_i6	YP_009174732.1	2442	29.882	425	247	16	1993	803	440	841	7.45e-35	146	putative DNA polymerase [Yellowstone lake phycodnavirus 1].	Yellowstone lake phycodnavirus 1	Viruses;Varidnaviria;Bamfordvirae;Nucleocytoviricota;Megaviricetes;Algavirales;Phycodnaviridae;Prasinovirus.	Phycodnaviridae	dsDNA
TRINITY_DN14680_c0_g1_i2	YP_009482268.1	2173	23.059	425	222	13	508	1710	33	376	1.88e-13	77	Zinc-finger domain containing protein [Pandoravirus neocaledonia].	Pandoravirus neocaledonia	Viruses;Pandoravirus.	Pandoravirus	dsDNA
TRINITY_DN14680_c0_g1_i8	YP_010789745.1	4717	51.179	424	192	8	3332	4585	140	554	6.46e-126	379	heat shock 70 kDa protein-like protein [Moumouvirus australiensis].	Moumouvirus australiensis	Viruses;Varidnaviria;Bamfordvirae;Nucleocytoviricota;Megaviricetes;Imitervirales;Mimiviridae;Megamimivirinae;Moumouvirus;Moumouvirusaustraliense.	Mimiviridae	dsDNA
TRINITY_DN224347_c0_g2_i1	YP_002296164.1	2215	41.745	424	218	7	1658	402	42	441	5.84e-99	327	putative serine palmitoyltransferase [Emiliania huxleyi virus 86]	Emiliania huxleyi virus 86	Viruses; Varidnaviria; Bamfordvirae; Nucleocytoviricota;Megaviricetes; Algavirales; Phycodnaviridae; Coccolithovirus.	Phycodnaviridae	dsDNA
TRINITY_DN3013_c0_g1_i2	YP_001883378.1	1523	28.066	424	233	17	223	1365	10	404	2.38e-30	125	aminoacylase [Musca domestica salivary gland hypertrophy virus].	Musca domestica salivary gland hypertrophy virus	Viruses;Naldaviricetes;Lefavirales;Hytrosaviridae;Muscavirus;Muscavirusmusdomesticae.	Hytrosaviridae	dsDNA
TRINITY_DN3013_c0_g1_i9	YP_010841253.1	3627	28.369	423	267	11	2960	1692	141	527	2.08e-44	172	putative ankyrin repeat protein [Cotonvirus japonicus].	Cotonvirus japonicus	Viruses;Varidnaviria;Bamfordvirae;Nucleocytoviricota;Megaviricetes;Imitervirales;Mimiviridae;Megamimivirinae;Cotonvirus;Cotonvirusjaponicum.	Mimiviridae	dsDNA
TRINITY_DN3013_c0_g1_i7	YP_010841253.1	3588	28.369	423	267	11	2921	1653	141	527	2.04e-44	172	putative ankyrin repeat protein [Cotonvirus japonicus].	Cotonvirus japonicus	Viruses;Varidnaviria;Bamfordvirae;Nucleocytoviricota;Megaviricetes;Imitervirales;Mimiviridae;Megamimivirinae;Cotonvirus;Cotonvirusjaponicum.	Mimiviridae	dsDNA
TRINITY_DN41579_c0_g1_i5	YP_010841253.1	3175	28.369	423	267	11	2508	1240	141	527	1.66e-44	172	putative ankyrin repeat protein [Cotonvirus japonicus].	Cotonvirus japonicus	Viruses;Varidnaviria;Bamfordvirae;Nucleocytoviricota;Megaviricetes;Imitervirales;Mimiviridae;Megamimivirinae;Cotonvirus;Cotonvirusjaponicum.	Mimiviridae	dsDNA
TRINITY_DN41579_c0_g1_i8	YP_010778819.1	2846	26.478	423	284	12	369	1574	141	557	3.67e-37	152	dynamin-like protein [Bodo saltans virus].	Bodo saltans virus	Viruses;Varidnaviria;Bamfordvirae;Nucleocytoviricota;Megaviricetes;Imitervirales;Mimiviridae;Klosneuvirinae;Theiavirus;Theiavirussalishense.	Mimiviridae	dsDNA
TRINITY_DN3791_c0_g1_i14	YP_010781174.1	1907	30.024	423	251	13	1788	544	9	394	9.81e-51	185	hypothetical protein QJ856_gp0191 [Tupanvirus deep ocean].	Tupanvirus deep ocean	Viruses;Varidnaviria;Bamfordvirae;Nucleocytoviricota;Megaviricetes;Imitervirales;Mimiviridae;Megamimivirinae;Tupanvirus.	Mimiviridae	dsDNA
TRINITY_DN41579_c0_g1_i13	YP_003986584.1	6703	27.725	422	267	13	1198	2379	358	769	3.7e-22	108	putative ankyrin repeat protein [Acanthamoeba polyphaga mimivirus].	Acanthamoeba polyphaga mimivirus	Viruses;Varidnaviria;Bamfordvirae;Nucleocytoviricota;Megaviricetes;Imitervirales;Mimiviridae;Megamimivirinae;Mimivirus;Mimivirusbradfordmassiliense.	Mimiviridae	dsDNA
TRINITY_DN3013_c0_g1_i10	YP_003986584.1	6658	27.725	422	267	13	1198	2379	358	769	3.67e-22	108	putative ankyrin repeat protein [Acanthamoeba polyphaga mimivirus].	Acanthamoeba polyphaga mimivirus	Viruses;Varidnaviria;Bamfordvirae;Nucleocytoviricota;Megaviricetes;Imitervirales;Mimiviridae;Megamimivirinae;Mimivirus;Mimivirusbradfordmassiliense.	Mimiviridae	dsDNA
TRINITY_DN29534_c0_g2_i6	YP_003986584.1	5960	27.725	422	267	13	500	1681	358	769	2.26e-22	108	putative ankyrin repeat protein [Acanthamoeba polyphaga mimivirus].	Acanthamoeba polyphaga mimivirus	Viruses;Varidnaviria;Bamfordvirae;Nucleocytoviricota;Megaviricetes;Imitervirales;Mimiviridae;Megamimivirinae;Mimivirus;Mimivirusbradfordmassiliense.	Mimiviridae	dsDNA
TRINITY_DN50232_c0_g1_i1	YP_010804074.1	4866	25.592	422	248	16	3356	4495	211	608	6.95e-16	87	peptidase family M49 [Fadolivirus algeromassiliense].	Fadolivirus algeromassiliense	Viruses;Varidnaviria;Bamfordvirae;Nucleocytoviricota;Megaviricetes;Imitervirales;Mimiviridae;Klosneuvirinae;Fadolivirus.	Mimiviridae	dsDNA
TRINITY_DN629_c1_g1_i9	YP_002321389.1	4090	40.758	422	227	8	1663	2925	3	402	2.23e-104	341	semaphorin-like protein [Oryctes rhinoceros nudivirus].	Oryctes rhinoceros nudivirus	Viruses;Naldaviricetes;Lefavirales;Nudiviridae;Alphanudivirus;Alphanudivirusoryrhinocerotis.	Nudiviridae	dsDNA
TRINITY_DN27054_c0_g1_i44	YP_002321389.1	4027	40.758	422	227	8	1600	2862	3	402	2.08e-104	341	semaphorin-like protein [Oryctes rhinoceros nudivirus].	Oryctes rhinoceros nudivirus	Viruses;Naldaviricetes;Lefavirales;Nudiviridae;Alphanudivirus;Alphanudivirusoryrhinocerotis.	Nudiviridae	dsDNA
TRINITY_DN629_c1_g1_i10	YP_002321389.1	3502	40.758	422	227	8	1075	2337	3	402	2.33e-105	341	semaphorin-like protein [Oryctes rhinoceros nudivirus].	Oryctes rhinoceros nudivirus	Viruses;Naldaviricetes;Lefavirales;Nudiviridae;Alphanudivirus;Alphanudivirusoryrhinocerotis.	Nudiviridae	dsDNA
TRINITY_DN346_c0_g1_i21	YP_002321389.1	3467	40.758	422	227	8	1040	2302	3	402	1.95e-105	341	semaphorin-like protein [Oryctes rhinoceros nudivirus].	Oryctes rhinoceros nudivirus	Viruses;Naldaviricetes;Lefavirales;Nudiviridae;Alphanudivirus;Alphanudivirusoryrhinocerotis.	Nudiviridae	dsDNA
TRINITY_DN5313_c1_g2_i6	YP_010804074.1	3438	25.592	422	248	16	1928	3067	211	608	4.34e-16	87	peptidase family M49 [Fadolivirus algeromassiliense].	Fadolivirus algeromassiliense	Viruses;Varidnaviria;Bamfordvirae;Nucleocytoviricota;Megaviricetes;Imitervirales;Mimiviridae;Klosneuvirinae;Fadolivirus.	Mimiviridae	dsDNA
TRINITY_DN5313_c1_g2_i18	YP_010804074.1	2999	25.592	422	248	16	1489	2628	211	608	3.54e-16	87	peptidase family M49 [Fadolivirus algeromassiliense].	Fadolivirus algeromassiliense	Viruses;Varidnaviria;Bamfordvirae;Nucleocytoviricota;Megaviricetes;Imitervirales;Mimiviridae;Klosneuvirinae;Fadolivirus.	Mimiviridae	dsDNA
TRINITY_DN5313_c1_g2_i14	YP_010804074.1	2693	25.592	422	248	16	1183	2322	211	608	2.99e-16	87	peptidase family M49 [Fadolivirus algeromassiliense].	Fadolivirus algeromassiliense	Viruses;Varidnaviria;Bamfordvirae;Nucleocytoviricota;Megaviricetes;Imitervirales;Mimiviridae;Klosneuvirinae;Fadolivirus.	Mimiviridae	dsDNA
TRINITY_DN5313_c1_g2_i11	YP_010789287.1	4649	28.029	421	235	14	214	1365	40	429	9.57e-28	124	ankyrin repeat protein [Megavirus baoshan].	Megavirus baoshan	Viruses;Varidnaviria;Bamfordvirae;Nucleocytoviricota;Megaviricetes;Imitervirales;Mimiviridae;Megamimivirinae;Megavirus;Megavirusbaoshanense.	Mimiviridae	dsDNA
TRINITY_DN1887_c0_g1_i1	NP_570746.1	4595	24.466	421	268	18	1313	132	166	563	9.59e-20	99	complement binding protein [Macacine gammaherpesvirus 5].	Macacine gammaherpesvirus 5	Viruses;Duplodnaviria;Heunggongvirae;Peploviricota;Herviviricetes;Herpesvirales;Orthoherpesviridae;Gammaherpesvirinae;Rhadinovirus;Rhadinovirusmacacinegamma5.	Orthoherpesviridae	dsDNA
TRINITY_DN5313_c1_g2_i7	YP_009361727.1	1737	29.929	421	226	13	1392	310	2	413	2.48e-38	149	Cysteine desulfurase NifS [Pacmanvirus A23].	Pacmanvirus A23	Viruses.	Viruses	unclassified viruses
TRINITY_DN1887_c0_g1_i6	NP_570746.1	3761	24.466	421	268	18	1313	132	166	563	5.4e-20	99.4	complement binding protein [Macacine gammaherpesvirus 5].	Macacine gammaherpesvirus 5	Viruses;Duplodnaviria;Heunggongvirae;Peploviricota;Herviviricetes;Herpesvirales;Orthoherpesviridae;Gammaherpesvirinae;Rhadinovirus;Rhadinovirusmacacinegamma5.	Orthoherpesviridae	dsDNA
TRINITY_DN2135_c0_g1_i3	YP_010841253.1	3627	30.879	421	243	15	2651	1395	88	462	3.06e-46	178	putative ankyrin repeat protein [Cotonvirus japonicus].	Cotonvirus japonicus	Viruses;Varidnaviria;Bamfordvirae;Nucleocytoviricota;Megaviricetes;Imitervirales;Mimiviridae;Megamimivirinae;Cotonvirus;Cotonvirusjaponicum.	Mimiviridae	dsDNA
TRINITY_DN96367_c0_g1_i4	YP_010841253.1	3588	30.879	421	243	15	2612	1356	88	462	3.01e-46	178	putative ankyrin repeat protein [Cotonvirus japonicus].	Cotonvirus japonicus	Viruses;Varidnaviria;Bamfordvirae;Nucleocytoviricota;Megaviricetes;Imitervirales;Mimiviridae;Megamimivirinae;Cotonvirus;Cotonvirusjaponicum.	Mimiviridae	dsDNA
TRINITY_DN346_c0_g1_i1	YP_010841253.1	3175	30.879	421	243	15	2199	943	88	462	2.41e-46	178	putative ankyrin repeat protein [Cotonvirus japonicus].	Cotonvirus japonicus	Viruses;Varidnaviria;Bamfordvirae;Nucleocytoviricota;Megaviricetes;Imitervirales;Mimiviridae;Megamimivirinae;Cotonvirus;Cotonvirusjaponicum.	Mimiviridae	dsDNA
TRINITY_DN3941_c0_g3_i1	YP_010780055.1	2738	46.081	421	214	6	1931	669	13	420	2.58e-124	385	mimivirus translation initiation factor 2 gamma subunit [Tupanvirusdeep ocean].	Tupanvirus deep ocean	Viruses;Varidnaviria;Bamfordvirae;Nucleocytoviricota;Megaviricetes;Imitervirales;Mimiviridae;Megamimivirinae;Tupanvirus.	Mimiviridae	dsDNA
TRINITY_DN23290_c0_g1_i2	YP_009482408.1	2536	24.941	421	271	12	1323	160	210	618	3.97e-23	108	hAT family C-terminal dimerization region domain containing protein[Pandoravirus neocaledonia].	Pandoravirus neocaledonia	Viruses;Pandoravirus.	Pandoravirus	dsDNA
TRINITY_DN5153_c9_g2_i6	YP_010796961.1	1242	41.568	421	215	8	5	1195	464	877	1.03e-94	311	PolB [Mayetiola barley midge adintovirus].	Mayetiola barley midge adintovirus	Viruses;Varidnaviria;Bamfordvirae;Preplasmiviricota;Polintoviricetes;Orthopolintovirales;Adintoviridae;Alphadintovirus;Alphadintovirusmayetiola.	Adintoviridae	dsDNA
TRINITY_DN5153_c9_g2_i3	YP_009352567.1	2423	30	420	215	13	923	2020	68	462	7.05e-28	122	Peroxinectin [Kaumoebavirus].	Kaumoebavirus	Viruses.	Viruses	unclassified viruses
TRINITY_DN2622_c0_g1_i3	YP_009352567.1	1969	30	420	215	13	693	1790	68	462	2.43e-28	122	Peroxinectin [Kaumoebavirus].	Kaumoebavirus	Viruses.	Viruses	unclassified viruses
TRINITY_DN2622_c0_g1_i4	YP_009046239.1	2911	32.381	420	258	15	845	2059	20	428	4.2e-41	164	ankyrin repeat protein [Penguinpox virus].	Penguinpox virus	Viruses;Varidnaviria;Bamfordvirae;Nucleocytoviricota;Pokkesviricetes;Chitovirales;Poxviridae;Chordopoxvirinae;Avipoxvirus.	Poxviridae	dsDNA
TRINITY_DN9436_c2_g1_i2	YP_611073.1	2834	26.19	420	271	10	1301	87	52	447	2.56e-35	144	global transactivator [Antheraea pernyi nucleopolyhedrovirus].	Antheraea pernyi nucleopolyhedrovirus	Viruses;Naldaviricetes;Lefavirales;Baculoviridae;Alphabaculovirus;Alphabaculovirusanpernyi.	Baculoviridae	dsDNA
TRINITY_DN11854_c1_g1_i6	YP_010780494.1	2329	27.924	419	262	14	1419	256	48	457	2.81e-35	144	aspartyl-tRNA synthetase [Tupanvirus deep ocean].	Tupanvirus deep ocean	Viruses;Varidnaviria;Bamfordvirae;Nucleocytoviricota;Megaviricetes;Imitervirales;Mimiviridae;Megamimivirinae;Tupanvirus.	Mimiviridae	dsDNA
TRINITY_DN265_c10_g2_i1	YP_009448636.1	1874	26.077	418	253	15	1422	187	76	443	2.21e-25	113	Cytochrome P450-like protein E-class [Orpheovirus IHUMI-LCC2].	Orpheovirus IHUMI-LCC2	Viruses;Varidnaviria;Bamfordvirae;Nucleocytoviricota;Megaviricetes;Algavirales;Phycodnaviridae.	Phycodnaviridae	dsDNA
TRINITY_DN265_c10_g2_i2	YP_008052581.1	4904	27.818	417	235	9	1779	727	1031	1447	8.56e-38	159	DNA-directed RNA polymerase II subunit RPB1 [Phaeocystis globosavirus].	Phaeocystis globosa virus	Viruses;Varidnaviria;Bamfordvirae;Nucleocytoviricota;Megaviricetes;Algavirales;Phycodnaviridae;Prymnesiovirus.	Phycodnaviridae	dsDNA
TRINITY_DN19630_c1_g2_i3	YP_008438720.1	4256	34.532	417	236	11	4131	2974	43	453	2.91e-53	197	Formate/glycerate dehydrogenase [Pandoravirus salinus].	Pandoravirus salinus	Viruses;Pandoravirus.	Pandoravirus	dsDNA
TRINITY_DN59971_c0_g1_i3	YP_008438720.1	4132	34.532	417	236	11	4007	2850	43	453	2.8e-53	197	Formate/glycerate dehydrogenase [Pandoravirus salinus].	Pandoravirus salinus	Viruses;Pandoravirus.	Pandoravirus	dsDNA
TRINITY_DN8921_c0_g1_i21	YP_009352567.1	3267	30.456	417	227	14	1083	2201	65	462	2.6e-35	145	Peroxinectin [Kaumoebavirus].	Kaumoebavirus	Viruses.	Viruses	unclassified viruses
TRINITY_DN8921_c0_g1_i41	YP_009361727.1	1164	28.777	417	213	13	23	1069	27	427	5.81e-31	125	Cysteine desulfurase NifS [Pacmanvirus A23].	Pacmanvirus A23	Viruses.	Viruses	unclassified viruses
TRINITY_DN76_c0_g1_i14	YP_010803393.1	3418	27.818	417	241	12	712	1953	45	404	2.67e-40	157	orotidine 5-phosphate decarboxylase [Fadolivirusalgeromassiliense].	Fadolivirus algeromassiliense	Viruses;Varidnaviria;Bamfordvirae;Nucleocytoviricota;Megaviricetes;Imitervirales;Mimiviridae;Klosneuvirinae;Fadolivirus.	Mimiviridae	dsDNA
TRINITY_DN64021_c1_g1_i2	YP_009046239.1	3150	36.211	417	244	12	756	1961	19	428	1.04e-51	196	ankyrin repeat protein [Penguinpox virus].	Penguinpox virus	Viruses;Varidnaviria;Bamfordvirae;Nucleocytoviricota;Pokkesviricetes;Chitovirales;Poxviridae;Chordopoxvirinae;Avipoxvirus.	Poxviridae	dsDNA
TRINITY_DN508_c0_g1_i30	YP_009046239.1	3087	36.211	417	244	12	693	1898	19	428	9.65e-52	196	ankyrin repeat protein [Penguinpox virus].	Penguinpox virus	Viruses;Varidnaviria;Bamfordvirae;Nucleocytoviricota;Pokkesviricetes;Chitovirales;Poxviridae;Chordopoxvirinae;Avipoxvirus.	Poxviridae	dsDNA
TRINITY_DN508_c0_g1_i24	YP_009046239.1	3002	36.211	417	244	12	608	1813	19	428	8.63e-52	196	ankyrin repeat protein [Penguinpox virus].	Penguinpox virus	Viruses;Varidnaviria;Bamfordvirae;Nucleocytoviricota;Pokkesviricetes;Chitovirales;Poxviridae;Chordopoxvirinae;Avipoxvirus.	Poxviridae	dsDNA
TRINITY_DN508_c0_g1_i25	YP_009046239.1	2939	36.211	417	244	12	545	1750	19	428	7.85e-52	196	ankyrin repeat protein [Penguinpox virus].	Penguinpox virus	Viruses;Varidnaviria;Bamfordvirae;Nucleocytoviricota;Pokkesviricetes;Chitovirales;Poxviridae;Chordopoxvirinae;Avipoxvirus.	Poxviridae	dsDNA
TRINITY_DN508_c0_g1_i40	YP_009046239.1	2911	36.211	417	244	12	545	1750	19	428	9.52e-52	196	ankyrin repeat protein [Penguinpox virus].	Penguinpox virus	Viruses;Varidnaviria;Bamfordvirae;Nucleocytoviricota;Pokkesviricetes;Chitovirales;Poxviridae;Chordopoxvirinae;Avipoxvirus.	Poxviridae	dsDNA
TRINITY_DN508_c0_g1_i3	YP_009046239.1	2712	36.211	417	244	12	318	1523	19	428	4.04e-52	196	ankyrin repeat protein [Penguinpox virus].	Penguinpox virus	Viruses;Varidnaviria;Bamfordvirae;Nucleocytoviricota;Pokkesviricetes;Chitovirales;Poxviridae;Chordopoxvirinae;Avipoxvirus.	Poxviridae	dsDNA
TRINITY_DN508_c0_g1_i20	YP_009345450.1	2535	50.839	417	166	2	1732	482	4	381	5.94e-145	435	eukaryotic peptide chain release factor subunit 1 [Noumeavirus].	Noumeavirus	Viruses;Varidnaviria;Bamfordvirae;Nucleocytoviricota;Megaviricetes;Pimascovirales;Marseilleviridae;Marseillevirus.	Marseilleviridae	dsDNA
TRINITY_DN508_c0_g1_i23	NP_955595.1	2342	76.019	417	90	2	1659	439	1	417	0	694	ABL [Abelson murine leukemia virus]	Abelson murine leukemia virus	Viruses; Riboviria; Pararnavirae; Artverviricota; Revtraviricetes;Ortervirales; Retroviridae; Orthoretrovirinae; Gammaretrovirus.	Retroviridae	ss-RNA
TRINITY_DN10688_c0_g1_i5	YP_009046239.1	2211	36.211	417	244	12	545	1750	19	428	1.68e-52	196	ankyrin repeat protein [Penguinpox virus].	Penguinpox virus	Viruses;Varidnaviria;Bamfordvirae;Nucleocytoviricota;Pokkesviricetes;Chitovirales;Poxviridae;Chordopoxvirinae;Avipoxvirus.	Poxviridae	dsDNA
TRINITY_DN10688_c0_g1_i3	YP_009664587.1	2175	22.542	417	251	14	648	1865	22	377	1.36e-12	73.6	ORF47 [white sturgeon herpesvirus 2].	white sturgeon herpesvirus 2	Viruses;Duplodnaviria;Heunggongvirae;Peploviricota;Herviviricetes;Herpesvirales;Alloherpesviridae;Ictavirus;Ictavirusacipenseridallo2.	Alloherpesviridae	dsDNA
TRINITY_DN10688_c0_g1_i1	NP_955595.1	2105	76.019	417	90	2	1659	439	1	417	0	694	ABL [Abelson murine leukemia virus]	Abelson murine leukemia virus	Viruses; Riboviria; Pararnavirae; Artverviricota; Revtraviricetes;Ortervirales; Retroviridae; Orthoretrovirinae; Gammaretrovirus.	Retroviridae	ss-RNA
TRINITY_DN8544_c0_g2_i5	YP_009046239.1	2035	36.211	417	244	12	545	1750	19	428	6.95e-53	196	ankyrin repeat protein [Penguinpox virus].	Penguinpox virus	Viruses;Varidnaviria;Bamfordvirae;Nucleocytoviricota;Pokkesviricetes;Chitovirales;Poxviridae;Chordopoxvirinae;Avipoxvirus.	Poxviridae	dsDNA
TRINITY_DN10688_c0_g1_i4	YP_010782577.1	1606	29.736	417	268	9	1348	128	472	873	2.7e-52	194	hypothetical protein QJ857_gp0130 [Tupanvirus soda lake].	Tupanvirus soda lake	Viruses;Varidnaviria;Bamfordvirae;Nucleocytoviricota;Megaviricetes;Imitervirales;Mimiviridae;Megamimivirinae;Tupanvirus.	Mimiviridae	dsDNA
TRINITY_DN16228_c0_g1_i11	YP_010778125.1	1532	34.772	417	241	11	197	1393	48	451	1.76e-50	186	putative ATP-dependent RNA helicase [Bodo saltans virus].	Bodo saltans virus	Viruses;Varidnaviria;Bamfordvirae;Nucleocytoviricota;Megaviricetes;Imitervirales;Mimiviridae;Klosneuvirinae;Theiavirus;Theiavirussalishense.	Mimiviridae	dsDNA
TRINITY_DN10688_c0_g1_i2	YP_009046239.1	1465	25.899	417	255	7	1269	28	31	396	9.65e-26	114	ankyrin repeat protein [Penguinpox virus].	Penguinpox virus	Viruses;Varidnaviria;Bamfordvirae;Nucleocytoviricota;Pokkesviricetes;Chitovirales;Poxviridae;Chordopoxvirinae;Avipoxvirus.	Poxviridae	dsDNA
TRINITY_DN16228_c0_g1_i4	YP_010796961.1	1266	46.283	417	209	4	5	1219	464	877	9.14e-120	379	PolB [Mayetiola barley midge adintovirus].	Mayetiola barley midge adintovirus	Viruses;Varidnaviria;Bamfordvirae;Preplasmiviricota;Polintoviricetes;Orthopolintovirales;Adintoviridae;Alphadintovirus;Alphadintovirusmayetiola.	Adintoviridae	dsDNA
TRINITY_DN16228_c0_g1_i5	NP_612245.1	4433	28.606	416	236	15	2099	3289	203	576	1.45e-16	89.4	ORF023R [Infectious spleen and kidney necrosis virus].	Infectious spleen and kidney necrosis virus	Viruses;Varidnaviria;Bamfordvirae;Nucleocytoviricota;Megaviricetes;Pimascovirales;Iridoviridae;Alphairidovirinae;Megalocytivirus.	Iridoviridae	dsDNA
TRINITY_DN2709_c1_g1_i2	NP_612245.1	4011	28.606	416	196	27	2688	1684	189	584	4.12e-06	55.1	ORF023R [Infectious spleen and kidney necrosis virus].	Infectious spleen and kidney necrosis virus	Viruses;Varidnaviria;Bamfordvirae;Nucleocytoviricota;Megaviricetes;Pimascovirales;Iridoviridae;Alphairidovirinae;Megalocytivirus.	Iridoviridae	dsDNA
TRINITY_DN2709_c1_g1_i8	NP_612245.1	3869	28.606	416	236	15	2099	3289	203	576	5.86e-17	90.5	ORF023R [Infectious spleen and kidney necrosis virus].	Infectious spleen and kidney necrosis virus	Viruses;Varidnaviria;Bamfordvirae;Nucleocytoviricota;Megaviricetes;Pimascovirales;Iridoviridae;Alphairidovirinae;Megalocytivirus.	Iridoviridae	dsDNA
TRINITY_DN2709_c1_g1_i6	NP_052026.1	2849	25.721	416	274	9	1291	86	153	547	2.23e-36	149	gp140R [Rabbit fibroma virus].	Rabbit fibroma virus	Viruses;Varidnaviria;Bamfordvirae;Nucleocytoviricota;Pokkesviricetes;Chitovirales;Poxviridae;Chordopoxvirinae;Leporipoxvirus.	Poxviridae	dsDNA
TRINITY_DN2709_c1_g1_i5	YP_010802959.1	2588	30.288	416	274	5	2179	935	11	411	5.36e-52	195	peroxisomal acyl-CoA oxidase [Fadolivirus algeromassiliense].	Fadolivirus algeromassiliense	Viruses;Varidnaviria;Bamfordvirae;Nucleocytoviricota;Megaviricetes;Imitervirales;Mimiviridae;Klosneuvirinae;Fadolivirus.	Mimiviridae	dsDNA
TRINITY_DN2709_c1_g1_i4	NP_052026.1	2255	25.721	416	274	9	1291	86	153	547	1.37e-36	148	gp140R [Rabbit fibroma virus].	Rabbit fibroma virus	Viruses;Varidnaviria;Bamfordvirae;Nucleocytoviricota;Pokkesviricetes;Chitovirales;Poxviridae;Chordopoxvirinae;Leporipoxvirus.	Poxviridae	dsDNA
TRINITY_DN2145_c2_g1_i4	NP_052026.1	2188	25.721	416	274	9	1291	86	153	547	1.26e-36	148	gp140R [Rabbit fibroma virus].	Rabbit fibroma virus	Viruses;Varidnaviria;Bamfordvirae;Nucleocytoviricota;Pokkesviricetes;Chitovirales;Poxviridae;Chordopoxvirinae;Leporipoxvirus.	Poxviridae	dsDNA
TRINITY_DN2145_c2_g1_i3	YP_758442.1	2163	29.327	416	272	9	555	1781	149	549	9.76e-56	202	egt [Leucania separata nucleopolyhedrovirus].	Leucania separata nucleopolyhedrovirus	Viruses;Naldaviricetes;Lefavirales;Baculoviridae;Alphabaculovirus;Alphabaculovirusleseparatae.	Baculoviridae	dsDNA
TRINITY_DN146955_c0_g1_i3	YP_010802959.1	2094	30.288	416	274	5	1685	441	11	411	1.04e-52	194	peroxisomal acyl-CoA oxidase [Fadolivirus algeromassiliense].	Fadolivirus algeromassiliense	Viruses;Varidnaviria;Bamfordvirae;Nucleocytoviricota;Megaviricetes;Imitervirales;Mimiviridae;Klosneuvirinae;Fadolivirus.	Mimiviridae	dsDNA
TRINITY_DN8212_c0_g1_i17	NP_052026.1	1833	25.721	416	274	9	1291	86	153	547	4.67e-37	148	gp140R [Rabbit fibroma virus].	Rabbit fibroma virus	Viruses;Varidnaviria;Bamfordvirae;Nucleocytoviricota;Pokkesviricetes;Chitovirales;Poxviridae;Chordopoxvirinae;Leporipoxvirus.	Poxviridae	dsDNA
TRINITY_DN3680_c0_g2_i6	YP_758442.1	1677	29.327	416	272	9	69	1295	149	549	3.54e-57	203	egt [Leucania separata nucleopolyhedrovirus].	Leucania separata nucleopolyhedrovirus	Viruses;Naldaviricetes;Lefavirales;Baculoviridae;Alphabaculovirus;Alphabaculovirusleseparatae.	Baculoviridae	dsDNA
TRINITY_DN3680_c0_g2_i7	YP_009640107.1	4600	45.542	415	193	10	2056	3282	7	394	1.58e-110	358	hypothetical protein AV955_gp119 [Diadromus pulchellus ascovirus4a].	Diadromus pulchellus ascovirus 4a	Viruses;Varidnaviria;Bamfordvirae;Nucleocytoviricota;Megaviricetes;Pimascovirales;Ascoviridae;Toursvirus;Toursvirusdptv1a.	Ascoviridae	dsDNA
TRINITY_DN38679_c0_g1_i5	YP_010841796.1	3792	31.084	415	248	13	2714	1473	146	523	1.1e-49	188	putative ankyrin repeat protein [Cotonvirus japonicus].	Cotonvirus japonicus	Viruses;Varidnaviria;Bamfordvirae;Nucleocytoviricota;Megaviricetes;Imitervirales;Mimiviridae;Megamimivirinae;Cotonvirus;Cotonvirusjaponicum.	Mimiviridae	dsDNA
TRINITY_DN38679_c0_g1_i4	YP_009640107.1	2646	45.542	415	193	10	102	1328	7	394	7.61e-115	358	hypothetical protein AV955_gp119 [Diadromus pulchellus ascovirus4a].	Diadromus pulchellus ascovirus 4a	Viruses;Varidnaviria;Bamfordvirae;Nucleocytoviricota;Megaviricetes;Pimascovirales;Ascoviridae;Toursvirus;Toursvirusdptv1a.	Ascoviridae	dsDNA
TRINITY_DN4197_c0_g1_i10	YP_010803251.1	2090	25.783	415	209	14	1430	435	45	443	6.48e-22	102	peptidase C19 ubiquitin carboxyl-terminal hydrolase [Fadolivirusalgeromassiliense].	Fadolivirus algeromassiliense	Viruses;Varidnaviria;Bamfordvirae;Nucleocytoviricota;Megaviricetes;Imitervirales;Mimiviridae;Klosneuvirinae;Fadolivirus.	Mimiviridae	dsDNA
TRINITY_DN4074_c1_g1_i2	YP_009552708.1	3335	24.396	414	275	12	1530	349	164	559	5.75e-14	79.7	putative NS1 [Bombus cryptarum densovirus].	Bombus cryptarum densovirus	Viruses;Monodnaviria;Shotokuvirae;Cossaviricota;Quintoviricetes;Piccovirales;Parvoviridae;Densovirinae.	Parvoviridae	ssDNA(+/-)
TRINITY_DN4074_c1_g1_i10	YP_010796969.1	2636	36.715	414	230	11	855	2060	1	394	5.62e-72	245	hexon [Mayetiola barley midge adintovirus].	Mayetiola barley midge adintovirus	Viruses;Varidnaviria;Bamfordvirae;Preplasmiviricota;Polintoviricetes;Orthopolintovirales;Adintoviridae;Alphadintovirus;Alphadintovirusmayetiola.	Adintoviridae	dsDNA
TRINITY_DN4074_c1_g1_i5	YP_010796969.1	2422	36.715	414	230	11	858	2063	1	394	1.92e-72	245	hexon [Mayetiola barley midge adintovirus].	Mayetiola barley midge adintovirus	Viruses;Varidnaviria;Bamfordvirae;Preplasmiviricota;Polintoviricetes;Orthopolintovirales;Adintoviridae;Alphadintovirus;Alphadintovirusmayetiola.	Adintoviridae	dsDNA
TRINITY_DN3987_c0_g3_i4	YP_009665762.1	3399	33.898	413	260	6	2509	1286	11	415	6.87e-71	256	19.5g1 protein [Bracoviriform inaniti].	Bracoviriform inaniti	Viruses;Polydnaviriformidae;Bracoviriform.	Polydnaviriformidae	dsDNA
TRINITY_DN1857_c0_g1_i4	YP_010803251.1	3293	28.814	413	207	10	1183	182	39	443	4.11e-40	158	peptidase C19 ubiquitin carboxyl-terminal hydrolase [Fadolivirusalgeromassiliense].	Fadolivirus algeromassiliense	Viruses;Varidnaviria;Bamfordvirae;Nucleocytoviricota;Megaviricetes;Imitervirales;Mimiviridae;Klosneuvirinae;Fadolivirus.	Mimiviridae	dsDNA
TRINITY_DN5465_c0_g1_i21	YP_009665762.1	3282	33.898	413	260	6	2509	1286	11	415	5.04e-71	256	19.5g1 protein [Bracoviriform inaniti].	Bracoviriform inaniti	Viruses;Polydnaviriformidae;Bracoviriform.	Polydnaviriformidae	dsDNA
TRINITY_DN3830_c0_g1_i2	YP_010803251.1	3181	28.814	413	207	10	1183	182	39	443	3.9e-40	158	peptidase C19 ubiquitin carboxyl-terminal hydrolase [Fadolivirusalgeromassiliense].	Fadolivirus algeromassiliense	Viruses;Varidnaviria;Bamfordvirae;Nucleocytoviricota;Megaviricetes;Imitervirales;Mimiviridae;Klosneuvirinae;Fadolivirus.	Mimiviridae	dsDNA
TRINITY_DN14449_c0_g3_i2	YP_009665762.1	3081	33.898	413	260	6	2424	1201	11	415	2.74e-71	256	19.5g1 protein [Bracoviriform inaniti].	Bracoviriform inaniti	Viruses;Polydnaviriformidae;Bracoviriform.	Polydnaviriformidae	dsDNA
TRINITY_DN14449_c0_g3_i1	YP_010803251.1	3022	28.814	413	207	10	1183	182	39	443	3.59e-40	158	peptidase C19 ubiquitin carboxyl-terminal hydrolase [Fadolivirusalgeromassiliense].	Fadolivirus algeromassiliense	Viruses;Varidnaviria;Bamfordvirae;Nucleocytoviricota;Megaviricetes;Imitervirales;Mimiviridae;Klosneuvirinae;Fadolivirus.	Mimiviridae	dsDNA
TRINITY_DN71019_c0_g2_i1	YP_010803251.1	2922	28.814	413	207	10	1183	182	39	443	3.38e-40	158	peptidase C19 ubiquitin carboxyl-terminal hydrolase [Fadolivirusalgeromassiliense].	Fadolivirus algeromassiliense	Viruses;Varidnaviria;Bamfordvirae;Nucleocytoviricota;Megaviricetes;Imitervirales;Mimiviridae;Klosneuvirinae;Fadolivirus.	Mimiviridae	dsDNA
TRINITY_DN24873_c0_g1_i17	YP_010803251.1	2374	28.814	413	207	10	1183	182	39	443	1.9e-40	158	peptidase C19 ubiquitin carboxyl-terminal hydrolase [Fadolivirusalgeromassiliense].	Fadolivirus algeromassiliense	Viruses;Varidnaviria;Bamfordvirae;Nucleocytoviricota;Megaviricetes;Imitervirales;Mimiviridae;Klosneuvirinae;Fadolivirus.	Mimiviridae	dsDNA
TRINITY_DN24873_c0_g1_i16	YP_010803251.1	2362	28.814	413	207	10	1183	182	39	443	1.86e-40	158	peptidase C19 ubiquitin carboxyl-terminal hydrolase [Fadolivirusalgeromassiliense].	Fadolivirus algeromassiliense	Viruses;Varidnaviria;Bamfordvirae;Nucleocytoviricota;Megaviricetes;Imitervirales;Mimiviridae;Klosneuvirinae;Fadolivirus.	Mimiviridae	dsDNA
TRINITY_DN24873_c0_g1_i6	YP_009481553.1	1757	23.729	413	233	14	509	1711	34	376	1.24e-13	77.4	hAT family C-terminal dimerization region domain containing protein[Pandoravirus macleodensis].	Pandoravirus macleodensis	Viruses;Pandoravirus.	Pandoravirus	dsDNA
TRINITY_DN195_c0_g1_i9	YP_009481553.1	1750	23.729	413	233	14	502	1704	34	376	1.23e-13	77.4	hAT family C-terminal dimerization region domain containing protein[Pandoravirus macleodensis].	Pandoravirus macleodensis	Viruses;Pandoravirus.	Pandoravirus	dsDNA
TRINITY_DN195_c0_g1_i4	YP_010803251.1	1666	28.814	413	207	10	1183	182	39	443	4.33e-41	157	peptidase C19 ubiquitin carboxyl-terminal hydrolase [Fadolivirusalgeromassiliense].	Fadolivirus algeromassiliense	Viruses;Varidnaviria;Bamfordvirae;Nucleocytoviricota;Megaviricetes;Imitervirales;Mimiviridae;Klosneuvirinae;Fadolivirus.	Mimiviridae	dsDNA
TRINITY_DN195_c0_g1_i42	YP_010781167.1	1633	43.099	413	225	2	5	1216	249	660	2.12e-115	359	threonyl-tRNA synthetase [Tupanvirus deep ocean].	Tupanvirus deep ocean	Viruses;Varidnaviria;Bamfordvirae;Nucleocytoviricota;Megaviricetes;Imitervirales;Mimiviridae;Megamimivirinae;Tupanvirus.	Mimiviridae	dsDNA
TRINITY_DN133061_c0_g1_i4	YP_009481553.1	1561	23.729	413	233	14	313	1515	34	376	9.51e-14	77.4	hAT family C-terminal dimerization region domain containing protein[Pandoravirus macleodensis].	Pandoravirus macleodensis	Viruses;Pandoravirus.	Pandoravirus	dsDNA
TRINITY_DN195_c0_g1_i14	NP_612245.1	1530	29.298	413	184	20	295	1416	239	582	3.04e-22	104	ORF023R [Infectious spleen and kidney necrosis virus].	Infectious spleen and kidney necrosis virus	Viruses;Varidnaviria;Bamfordvirae;Nucleocytoviricota;Megaviricetes;Pimascovirales;Iridoviridae;Alphairidovirinae;Megalocytivirus.	Iridoviridae	dsDNA
TRINITY_DN133061_c0_g1_i3	YP_001883378.1	1529	28.329	413	248	16	223	1371	10	404	1.2e-32	132	aminoacylase [Musca domestica salivary gland hypertrophy virus].	Musca domestica salivary gland hypertrophy virus	Viruses;Naldaviricetes;Lefavirales;Hytrosaviridae;Muscavirus;Muscavirusmusdomesticae.	Hytrosaviridae	dsDNA
TRINITY_DN5674_c0_g1_i8	YP_008052581.1	4519	27.913	412	231	9	1394	357	1031	1442	1.89e-37	158	DNA-directed RNA polymerase II subunit RPB1 [Phaeocystis globosavirus].	Phaeocystis globosa virus	Viruses;Varidnaviria;Bamfordvirae;Nucleocytoviricota;Megaviricetes;Algavirales;Phycodnaviridae;Prymnesiovirus.	Phycodnaviridae	dsDNA
TRINITY_DN133061_c0_g1_i5	YP_010782648.1	4089	22.573	412	263	7	1561	2631	368	778	1.74e-19	98.6	elongation factor 2 [Tupanvirus soda lake].	Tupanvirus soda lake	Viruses;Varidnaviria;Bamfordvirae;Nucleocytoviricota;Megaviricetes;Imitervirales;Mimiviridae;Megamimivirinae;Tupanvirus.	Mimiviridae	dsDNA
TRINITY_DN133061_c0_g1_i6	YP_001498097.1	2912	24.272	412	291	9	815	2032	15	411	6.95e-18	91.3	hypothetical protein AR158_C015L [Paramecium bursaria Chlorellavirus AR158].	Paramecium bursaria Chlorella virus AR158	Viruses;Varidnaviria;Bamfordvirae;Nucleocytoviricota;Megaviricetes;Algavirales;Phycodnaviridae;Chlorovirus.	Phycodnaviridae	dsDNA
TRINITY_DN13528_c0_g1_i6	YP_001498097.1	2882	24.272	412	291	9	815	2032	15	411	6.84e-18	91.3	hypothetical protein AR158_C015L [Paramecium bursaria Chlorellavirus AR158].	Paramecium bursaria Chlorella virus AR158	Viruses;Varidnaviria;Bamfordvirae;Nucleocytoviricota;Megaviricetes;Algavirales;Phycodnaviridae;Chlorovirus.	Phycodnaviridae	dsDNA
TRINITY_DN4217_c0_g1_i10	YP_001883394.1	2627	22.087	412	285	9	1231	92	172	579	4.47e-18	92.4	hypothetical protein MdSGHV066 [Musca domestica salivary glandhypertrophy virus].	Musca domestica salivary gland hypertrophy virus	Viruses;Naldaviricetes;Lefavirales;Hytrosaviridae;Muscavirus;Muscavirusmusdomesticae.	Hytrosaviridae	dsDNA
TRINITY_DN25855_c0_g1_i2	YP_009182236.1	2357	25.485	412	240	17	1536	307	28	374	1.33e-23	107	hypothetical protein [Diatraea saccharalis granulovirus].	Diatraea saccharalis granulovirus	Viruses;Naldaviricetes;Lefavirales;Baculoviridae;Betabaculovirus;Betabaculovirusdisaccharalis.	Baculoviridae	dsDNA
TRINITY_DN13528_c0_g1_i4	YP_010780329.1	5023	41.363	411	213	4	2354	1191	108	513	1.87e-80	278	lysine-tRNA synthetase [Tupanvirus deep ocean].	Tupanvirus deep ocean	Viruses;Varidnaviria;Bamfordvirae;Nucleocytoviricota;Megaviricetes;Imitervirales;Mimiviridae;Megamimivirinae;Tupanvirus.	Mimiviridae	dsDNA
TRINITY_DN25855_c0_g1_i4	YP_010780329.1	5022	41.363	411	213	4	2354	1191	108	513	1.87e-80	278	lysine-tRNA synthetase [Tupanvirus deep ocean].	Tupanvirus deep ocean	Viruses;Varidnaviria;Bamfordvirae;Nucleocytoviricota;Megaviricetes;Imitervirales;Mimiviridae;Megamimivirinae;Tupanvirus.	Mimiviridae	dsDNA
TRINITY_DN6274_c0_g1_i1	YP_010796969.1	4640	36.983	411	242	8	1818	3032	1	400	5.79e-88	296	hexon [Mayetiola barley midge adintovirus].	Mayetiola barley midge adintovirus	Viruses;Varidnaviria;Bamfordvirae;Preplasmiviricota;Polintoviricetes;Orthopolintovirales;Adintoviridae;Alphadintovirus;Alphadintovirusmayetiola.	Adintoviridae	dsDNA
TRINITY_DN4217_c0_g1_i8	YP_010796969.1	4637	36.983	411	242	8	1818	3032	1	400	5.78e-88	296	hexon [Mayetiola barley midge adintovirus].	Mayetiola barley midge adintovirus	Viruses;Varidnaviria;Bamfordvirae;Preplasmiviricota;Polintoviricetes;Orthopolintovirales;Adintoviridae;Alphadintovirus;Alphadintovirusmayetiola.	Adintoviridae	dsDNA
TRINITY_DN10059_c0_g1_i1	YP_010780329.1	4630	41.363	411	213	4	2361	1198	108	513	1.57e-80	278	lysine-tRNA synthetase [Tupanvirus deep ocean].	Tupanvirus deep ocean	Viruses;Varidnaviria;Bamfordvirae;Nucleocytoviricota;Megaviricetes;Imitervirales;Mimiviridae;Megamimivirinae;Tupanvirus.	Mimiviridae	dsDNA
TRINITY_DN24775_c0_g1_i1	YP_010796969.1	4222	36.983	411	242	8	1818	3032	1	400	3.47e-88	296	hexon [Mayetiola barley midge adintovirus].	Mayetiola barley midge adintovirus	Viruses;Varidnaviria;Bamfordvirae;Preplasmiviricota;Polintoviricetes;Orthopolintovirales;Adintoviridae;Alphadintovirus;Alphadintovirusmayetiola.	Adintoviridae	dsDNA
TRINITY_DN2688_c0_g1_i2	YP_010796969.1	4143	36.983	411	242	8	1818	3032	1	400	3.03e-88	296	hexon [Mayetiola barley midge adintovirus].	Mayetiola barley midge adintovirus	Viruses;Varidnaviria;Bamfordvirae;Preplasmiviricota;Polintoviricetes;Orthopolintovirales;Adintoviridae;Alphadintovirus;Alphadintovirusmayetiola.	Adintoviridae	dsDNA
TRINITY_DN6208_c0_g1_i3	YP_009173589.1	3631	29.197	411	249	9	2506	1289	20	393	1.63e-50	187	Helicase 45 [Chrysochromulina ericina virus].	Chrysochromulina ericina virus	Viruses;Varidnaviria;Bamfordvirae;Nucleocytoviricota;Megaviricetes;Algavirales;Phycodnaviridae.	Phycodnaviridae	dsDNA
TRINITY_DN6208_c0_g1_i8	YP_009173589.1	3434	29.197	411	249	9	2309	1092	20	393	1.49e-50	187	Helicase 45 [Chrysochromulina ericina virus].	Chrysochromulina ericina virus	Viruses;Varidnaviria;Bamfordvirae;Nucleocytoviricota;Megaviricetes;Algavirales;Phycodnaviridae.	Phycodnaviridae	dsDNA
TRINITY_DN6208_c0_g1_i4	YP_010780181.1	3140	20.438	411	262	15	632	1786	111	482	3.38e-11	71.2	hypothetical protein QJ856_gp1184 [Tupanvirus deep ocean].	Tupanvirus deep ocean	Viruses;Varidnaviria;Bamfordvirae;Nucleocytoviricota;Megaviricetes;Imitervirales;Mimiviridae;Megamimivirinae;Tupanvirus.	Mimiviridae	dsDNA
TRINITY_DN6208_c0_g1_i1	YP_009666148.1	3003	26.764	411	225	9	692	1906	8	348	6.41e-35	140	hypothetical protein FLA14_p101 [Diachasmimorpha longicaudataentomopoxvirus].	Diachasmimorpha longicaudata entomopoxvirus	Viruses;Varidnaviria;Bamfordvirae;Nucleocytoviricota;Pokkesviricetes;Chitovirales;Poxviridae;Entomopoxvirinae;Diachasmimorphaentomopoxvirus.	Poxviridae	dsDNA
TRINITY_DN23151_c0_g1_i58	YP_009173589.1	2236	29.684	411	255	8	1438	215	13	392	1.27e-50	185	Helicase 45 [Chrysochromulina ericina virus].	Chrysochromulina ericina virus	Viruses;Varidnaviria;Bamfordvirae;Nucleocytoviricota;Megaviricetes;Algavirales;Phycodnaviridae.	Phycodnaviridae	dsDNA
TRINITY_DN23151_c0_g1_i38	YP_010781461.1	2160	30.9	411	253	13	609	1808	94	484	3.87e-53	200	aminopeptidase M1-like [Tupanvirus soda lake].	Tupanvirus soda lake	Viruses;Varidnaviria;Bamfordvirae;Nucleocytoviricota;Megaviricetes;Imitervirales;Mimiviridae;Megamimivirinae;Tupanvirus.	Mimiviridae	dsDNA
TRINITY_DN3466_c0_g1_i29	YP_010804172.1	4070	45.366	410	198	5	2550	1330	170	556	2.82e-107	335	DNA topoisomerase I [Fadolivirus algeromassiliense].	Fadolivirus algeromassiliense	Viruses;Varidnaviria;Bamfordvirae;Nucleocytoviricota;Megaviricetes;Imitervirales;Mimiviridae;Klosneuvirinae;Fadolivirus.	Mimiviridae	dsDNA
TRINITY_DN23151_c0_g1_i51	YP_009448636.1	2392	23.659	410	233	10	1592	384	106	442	2.16e-24	110	Cytochrome P450-like protein E-class [Orpheovirus IHUMI-LCC2].	Orpheovirus IHUMI-LCC2	Viruses;Varidnaviria;Bamfordvirae;Nucleocytoviricota;Megaviricetes;Algavirales;Phycodnaviridae.	Phycodnaviridae	dsDNA
TRINITY_DN2233_c0_g2_i12	YP_002296164.1	2151	41.951	410	209	7	1594	380	42	427	8.41e-96	318	putative serine palmitoyltransferase [Emiliania huxleyi virus 86]	Emiliania huxleyi virus 86	Viruses; Varidnaviria; Bamfordvirae; Nucleocytoviricota;Megaviricetes; Algavirales; Phycodnaviridae; Coccolithovirus.	Phycodnaviridae	dsDNA
TRINITY_DN3368_c0_g1_i10	YP_009448636.1	2051	23.415	410	234	10	1592	384	106	442	1.95e-24	110	Cytochrome P450-like protein E-class [Orpheovirus IHUMI-LCC2].	Orpheovirus IHUMI-LCC2	Viruses;Varidnaviria;Bamfordvirae;Nucleocytoviricota;Megaviricetes;Algavirales;Phycodnaviridae.	Phycodnaviridae	dsDNA
TRINITY_DN1135_c1_g1_i16	YP_010780619.1	1300	31.463	410	225	15	1181	6	22	393	1.96e-36	141	putative RNA methyltransferase [Tupanvirus deep ocean].	Tupanvirus deep ocean	Viruses;Varidnaviria;Bamfordvirae;Nucleocytoviricota;Megaviricetes;Imitervirales;Mimiviridae;Megamimivirinae;Tupanvirus.	Mimiviridae	dsDNA
TRINITY_DN41597_c0_g1_i7	YP_010801995.1	1613	34.963	409	215	14	335	1501	9	386	2.92e-59	206	beta-galactosidase [Acanthamoeba castellanii medusavirus].	Acanthamoeba castellanii medusavirus	Viruses.	Viruses	unclassified viruses
TRINITY_DN78601_c0_g1_i56	YP_009165762.1	3233	28.851	409	246	15	2966	1833	43	437	1.56e-29	128	hypothetical protein APL35_gp011 [Apis mellifera filamentousvirus].	Apis mellifera filamentous virus	Viruses.	Viruses	unclassified viruses
TRINITY_DN9017_c0_g1_i1	YP_009352567.1	1703	30.807	409	216	13	1521	445	60	451	6.68e-41	157	Peroxinectin [Kaumoebavirus].	Kaumoebavirus	Viruses.	Viruses	unclassified viruses
TRINITY_DN9017_c0_g1_i2	YP_009282728.1	2822	38.631	409	220	15	585	1790	2	386	7.44e-76	258	nicking-joining enzyme [Skunkpox virus].	Skunkpox virus	Viruses;Varidnaviria;Bamfordvirae;Nucleocytoviricota;Pokkesviricetes;Chitovirales;Poxviridae;Chordopoxvirinae;Orthopoxvirus.	Poxviridae	dsDNA
TRINITY_DN6413_c0_g1_i4	YP_009481108.1	2809	28.117	409	222	16	1581	2660	232	617	1.36e-34	118	hAT family C-terminal dimerization region domain containing protein[Pandoravirus macleodensis].	Pandoravirus macleodensis	Viruses;Pandoravirus.	Pandoravirus	dsDNA
TRINITY_DN15576_c1_g1_i1	YP_009282728.1	2766	38.631	409	220	15	529	1734	2	386	5.85e-76	258	nicking-joining enzyme [Skunkpox virus].	Skunkpox virus	Viruses;Varidnaviria;Bamfordvirae;Nucleocytoviricota;Pokkesviricetes;Chitovirales;Poxviridae;Chordopoxvirinae;Orthopoxvirus.	Poxviridae	dsDNA
TRINITY_DN15576_c1_g1_i28	YP_004347130.1	2618	51.834	409	158	2	1818	592	3	372	1.33e-144	435	eukaryotic peptide chain release factor subunit 1 [Lausannevirus].	Lausannevirus	Viruses;Varidnaviria;Bamfordvirae;Nucleocytoviricota;Megaviricetes;Pimascovirales;Marseilleviridae.	Marseilleviridae	dsDNA
TRINITY_DN15576_c1_g1_i34	YP_009116977.1	1766	29.584	409	220	18	1495	440	146	543	1.25e-40	158	chitinase [Pseudoplusia includens SNPV IE].	Pseudoplusia includens SNPV IE	Viruses;Naldaviricetes;Lefavirales;Baculoviridae;Alphabaculovirus;Alphabaculovirusalterchrincludentis.	Baculoviridae	dsDNA
TRINITY_DN15576_c1_g1_i13	YP_010804074.1	1551	25.672	409	241	15	71	1180	224	608	7.85e-17	87	peptidase family M49 [Fadolivirus algeromassiliense].	Fadolivirus algeromassiliense	Viruses;Varidnaviria;Bamfordvirae;Nucleocytoviricota;Megaviricetes;Imitervirales;Mimiviridae;Klosneuvirinae;Fadolivirus.	Mimiviridae	dsDNA
TRINITY_DN15576_c1_g1_i15	NP_570746.1	1403	24.51	408	260	17	1274	132	177	563	1.75e-20	97.8	complement binding protein [Macacine gammaherpesvirus 5].	Macacine gammaherpesvirus 5	Viruses;Duplodnaviria;Heunggongvirae;Peploviricota;Herviviricetes;Herpesvirales;Orthoherpesviridae;Gammaherpesvirinae;Rhadinovirus;Rhadinovirusmacacinegamma5.	Orthoherpesviridae	dsDNA
TRINITY_DN54161_c0_g1_i11	YP_010803251.1	1320	28.676	408	211	8	270	1271	42	443	1.21e-45	167	peptidase C19 ubiquitin carboxyl-terminal hydrolase [Fadolivirusalgeromassiliense].	Fadolivirus algeromassiliense	Viruses;Varidnaviria;Bamfordvirae;Nucleocytoviricota;Megaviricetes;Imitervirales;Mimiviridae;Klosneuvirinae;Fadolivirus.	Mimiviridae	dsDNA
TRINITY_DN98_c1_g1_i4	NP_612245.1	7289	26.29	407	221	20	6019	4961	199	580	0.008	45.1	ORF023R [Infectious spleen and kidney necrosis virus].	Infectious spleen and kidney necrosis virus	Viruses;Varidnaviria;Bamfordvirae;Nucleocytoviricota;Megaviricetes;Pimascovirales;Iridoviridae;Alphairidovirinae;Megalocytivirus.	Iridoviridae	dsDNA
TRINITY_DN94824_c0_g1_i5	YP_010803532.1	5459	36.364	407	210	7	3274	2060	8	367	1.55e-79	285	eukaryotic translation elongation factor 2 [Fadolivirusalgeromassiliense].	Fadolivirus algeromassiliense	Viruses;Varidnaviria;Bamfordvirae;Nucleocytoviricota;Megaviricetes;Imitervirales;Mimiviridae;Klosneuvirinae;Fadolivirus.	Mimiviridae	dsDNA
TRINITY_DN70883_c0_g1_i1	YP_010803532.1	5270	36.364	407	210	7	3274	2060	8	367	1.46e-79	285	eukaryotic translation elongation factor 2 [Fadolivirusalgeromassiliense].	Fadolivirus algeromassiliense	Viruses;Varidnaviria;Bamfordvirae;Nucleocytoviricota;Megaviricetes;Imitervirales;Mimiviridae;Klosneuvirinae;Fadolivirus.	Mimiviridae	dsDNA
TRINITY_DN4939_c0_g2_i2	YP_010803532.1	4854	36.364	407	210	7	3274	2060	8	367	1.22e-79	285	eukaryotic translation elongation factor 2 [Fadolivirusalgeromassiliense].	Fadolivirus algeromassiliense	Viruses;Varidnaviria;Bamfordvirae;Nucleocytoviricota;Megaviricetes;Imitervirales;Mimiviridae;Klosneuvirinae;Fadolivirus.	Mimiviridae	dsDNA
TRINITY_DN57624_c0_g1_i2	YP_010803532.1	4553	36.364	407	210	7	3274	2060	8	367	9.93e-80	285	eukaryotic translation elongation factor 2 [Fadolivirusalgeromassiliense].	Fadolivirus algeromassiliense	Viruses;Varidnaviria;Bamfordvirae;Nucleocytoviricota;Megaviricetes;Imitervirales;Mimiviridae;Klosneuvirinae;Fadolivirus.	Mimiviridae	dsDNA
TRINITY_DN57624_c0_g1_i1	YP_010803532.1	4512	36.364	407	210	7	3274	2060	8	367	9.57e-80	285	eukaryotic translation elongation factor 2 [Fadolivirusalgeromassiliense].	Fadolivirus algeromassiliense	Viruses;Varidnaviria;Bamfordvirae;Nucleocytoviricota;Megaviricetes;Imitervirales;Mimiviridae;Klosneuvirinae;Fadolivirus.	Mimiviridae	dsDNA
TRINITY_DN3076_c0_g1_i21	YP_010803017.1	3218	24.816	407	235	12	1015	2100	415	795	2.02e-13	78.6	phosphoenolpyruvate synthase [Fadolivirus algeromassiliense].	Fadolivirus algeromassiliense	Viruses;Varidnaviria;Bamfordvirae;Nucleocytoviricota;Megaviricetes;Imitervirales;Mimiviridae;Klosneuvirinae;Fadolivirus.	Mimiviridae	dsDNA
TRINITY_DN549_c0_g1_i1	YP_009329403.1	2230	26.536	407	262	12	344	1522	61	444	8.26e-34	140	ABC transporter, partial [Cedratvirus A11].	Cedratvirus A11	Viruses;Pithoviruses.	Pithoviruses	dsDNA
TRINITY_DN224_c1_g1_i3	YP_010803108.1	1849	28.501	407	231	10	1651	470	21	380	2.3e-42	160	ATP-dependent RNA helicase DEAD-box [Fadolivirusalgeromassiliense].	Fadolivirus algeromassiliense	Viruses;Varidnaviria;Bamfordvirae;Nucleocytoviricota;Megaviricetes;Imitervirales;Mimiviridae;Klosneuvirinae;Fadolivirus.	Mimiviridae	dsDNA
TRINITY_DN266557_c0_g1_i1	YP_010800375.1	3699	25.123	406	209	17	2095	893	1385	1700	3.63e-12	75.1	putative replicase [Insect mesonivirus 1].	Insect mesonivirus 1	Viruses;Riboviria;Orthornavirae;Pisuviricota;Pisoniviricetes;Nidovirales;Mesnidovirineae;Mesoniviridae;Menanivirinae;Nasenivirus;Insemevirus;Insemevirustami.	Mesoniviridae	ssRNA(+)
TRINITY_DN335_c0_g1_i26	YP_010778092.1	3290	55.172	406	167	4	896	2083	15	415	1.62e-123	389	putative DnaKHSP70-like protein [Bodo saltans virus].	Bodo saltans virus	Viruses;Varidnaviria;Bamfordvirae;Nucleocytoviricota;Megaviricetes;Imitervirales;Mimiviridae;Klosneuvirinae;Theiavirus;Theiavirussalishense.	Mimiviridae	dsDNA
TRINITY_DN1417_c8_g2_i3	YP_009448636.1	2002	25.123	406	260	12	649	1836	76	447	1.21e-29	126	Cytochrome P450-like protein E-class [Orpheovirus IHUMI-LCC2].	Orpheovirus IHUMI-LCC2	Viruses;Varidnaviria;Bamfordvirae;Nucleocytoviricota;Megaviricetes;Algavirales;Phycodnaviridae.	Phycodnaviridae	dsDNA
TRINITY_DN1805_c1_g1_i10	YP_010781461.1	1513	28.818	406	250	12	1212	37	85	465	4.14e-43	166	aminopeptidase M1-like [Tupanvirus soda lake].	Tupanvirus soda lake	Viruses;Varidnaviria;Bamfordvirae;Nucleocytoviricota;Megaviricetes;Imitervirales;Mimiviridae;Megamimivirinae;Tupanvirus.	Mimiviridae	dsDNA
TRINITY_DN1805_c1_g1_i33	YP_009046239.1	3665	27.407	405	252	10	3563	2406	66	447	5.51e-26	118	ankyrin repeat protein [Penguinpox virus].	Penguinpox virus	Viruses;Varidnaviria;Bamfordvirae;Nucleocytoviricota;Pokkesviricetes;Chitovirales;Poxviridae;Chordopoxvirinae;Avipoxvirus.	Poxviridae	dsDNA
TRINITY_DN1805_c1_g1_i42	YP_001498097.1	2912	26.914	405	246	10	1238	2443	20	377	4.59e-22	104	hypothetical protein AR158_C015L [Paramecium bursaria Chlorellavirus AR158].	Paramecium bursaria Chlorella virus AR158	Viruses;Varidnaviria;Bamfordvirae;Nucleocytoviricota;Megaviricetes;Algavirales;Phycodnaviridae;Chlorovirus.	Phycodnaviridae	dsDNA
TRINITY_DN54419_c1_g1_i7	YP_001498097.1	2882	26.914	405	246	10	1238	2443	20	377	4.51e-22	104	hypothetical protein AR158_C015L [Paramecium bursaria Chlorellavirus AR158].	Paramecium bursaria Chlorella virus AR158	Viruses;Varidnaviria;Bamfordvirae;Nucleocytoviricota;Megaviricetes;Algavirales;Phycodnaviridae;Chlorovirus.	Phycodnaviridae	dsDNA
TRINITY_DN21088_c0_g1_i20	YP_010803251.1	3693	29.208	404	209	9	2443	3429	42	443	4.89e-46	176	peptidase C19 ubiquitin carboxyl-terminal hydrolase [Fadolivirusalgeromassiliense].	Fadolivirus algeromassiliense	Viruses;Varidnaviria;Bamfordvirae;Nucleocytoviricota;Megaviricetes;Imitervirales;Mimiviridae;Klosneuvirinae;Fadolivirus.	Mimiviridae	dsDNA
TRINITY_DN21389_c0_g2_i3	YP_010803251.1	3251	29.208	404	209	9	2001	2987	42	443	4.01e-46	176	peptidase C19 ubiquitin carboxyl-terminal hydrolase [Fadolivirusalgeromassiliense].	Fadolivirus algeromassiliense	Viruses;Varidnaviria;Bamfordvirae;Nucleocytoviricota;Megaviricetes;Imitervirales;Mimiviridae;Klosneuvirinae;Fadolivirus.	Mimiviridae	dsDNA
TRINITY_DN21389_c0_g2_i14	YP_010803251.1	2741	29.208	404	209	9	1491	2477	42	443	2.6e-46	176	peptidase C19 ubiquitin carboxyl-terminal hydrolase [Fadolivirusalgeromassiliense].	Fadolivirus algeromassiliense	Viruses;Varidnaviria;Bamfordvirae;Nucleocytoviricota;Megaviricetes;Imitervirales;Mimiviridae;Klosneuvirinae;Fadolivirus.	Mimiviridae	dsDNA
TRINITY_DN26469_c1_g1_i6	YP_010803251.1	2729	28.465	404	212	8	1479	2465	42	443	5.77e-46	174	peptidase C19 ubiquitin carboxyl-terminal hydrolase [Fadolivirusalgeromassiliense].	Fadolivirus algeromassiliense	Viruses;Varidnaviria;Bamfordvirae;Nucleocytoviricota;Megaviricetes;Imitervirales;Mimiviridae;Klosneuvirinae;Fadolivirus.	Mimiviridae	dsDNA
TRINITY_DN54704_c0_g1_i1	YP_010803251.1	2660	29.208	404	209	9	1410	2396	42	443	2.31e-46	176	peptidase C19 ubiquitin carboxyl-terminal hydrolase [Fadolivirusalgeromassiliense].	Fadolivirus algeromassiliense	Viruses;Varidnaviria;Bamfordvirae;Nucleocytoviricota;Megaviricetes;Imitervirales;Mimiviridae;Klosneuvirinae;Fadolivirus.	Mimiviridae	dsDNA
TRINITY_DN54704_c0_g1_i4	YP_010796961.1	6880	42.928	403	213	6	2565	1378	598	990	8.09e-99	303	PolB [Mayetiola barley midge adintovirus].	Mayetiola barley midge adintovirus	Viruses;Varidnaviria;Bamfordvirae;Preplasmiviricota;Polintoviricetes;Orthopolintovirales;Adintoviridae;Alphadintovirus;Alphadintovirusmayetiola.	Adintoviridae	dsDNA
TRINITY_DN3013_c0_g1_i27	YP_010803108.1	4316	22.333	403	237	14	2619	3818	45	374	2.64e-18	92.4	ATP-dependent RNA helicase DEAD-box [Fadolivirusalgeromassiliense].	Fadolivirus algeromassiliense	Viruses;Varidnaviria;Bamfordvirae;Nucleocytoviricota;Megaviricetes;Imitervirales;Mimiviridae;Klosneuvirinae;Fadolivirus.	Mimiviridae	dsDNA
TRINITY_DN3013_c0_g1_i15	YP_010803108.1	3994	22.333	403	237	14	2297	3496	45	374	2.4e-18	92.4	ATP-dependent RNA helicase DEAD-box [Fadolivirusalgeromassiliense].	Fadolivirus algeromassiliense	Viruses;Varidnaviria;Bamfordvirae;Nucleocytoviricota;Megaviricetes;Imitervirales;Mimiviridae;Klosneuvirinae;Fadolivirus.	Mimiviridae	dsDNA
TRINITY_DN3013_c0_g1_i18	YP_010780309.1	2989	21.836	403	251	16	1952	795	146	501	0.000311	48.5	NcpA [Tupanvirus deep ocean].	Tupanvirus deep ocean	Viruses;Varidnaviria;Bamfordvirae;Nucleocytoviricota;Megaviricetes;Imitervirales;Mimiviridae;Megamimivirinae;Tupanvirus.	Mimiviridae	dsDNA
TRINITY_DN54530_c0_g3_i2	YP_628286.1	2699	61.042	403	137	6	1685	522	124	521	1.41e-164	495	protein-tyrosine kinase [Y73 sarcoma virus].	Y73 sarcoma virus	Viruses;Riboviria;Pararnavirae;Artverviricota;Revtraviricetes;Ortervirales;Retroviridae;Orthoretrovirinae;Alpharetrovirus.	Retroviridae	ssRNA-RT
TRINITY_DN8295_c1_g1_i22	YP_010780309.1	2428	21.836	403	251	16	1952	795	146	501	0.000422	47.8	NcpA [Tupanvirus deep ocean].	Tupanvirus deep ocean	Viruses;Varidnaviria;Bamfordvirae;Nucleocytoviricota;Megaviricetes;Imitervirales;Mimiviridae;Megamimivirinae;Tupanvirus.	Mimiviridae	dsDNA
TRINITY_DN54530_c0_g3_i5	YP_010780309.1	2351	21.836	403	251	16	1952	795	146	501	0.000229	48.5	NcpA [Tupanvirus deep ocean].	Tupanvirus deep ocean	Viruses;Varidnaviria;Bamfordvirae;Nucleocytoviricota;Megaviricetes;Imitervirales;Mimiviridae;Megamimivirinae;Tupanvirus.	Mimiviridae	dsDNA
TRINITY_DN8295_c1_g1_i19	YP_010804038.1	2215	26.551	403	241	14	1926	850	40	431	2.42e-16	85.9	L-lysine 6-transaminase [Fadolivirus algeromassiliense].	Fadolivirus algeromassiliense	Viruses;Varidnaviria;Bamfordvirae;Nucleocytoviricota;Megaviricetes;Imitervirales;Mimiviridae;Klosneuvirinae;Fadolivirus.	Mimiviridae	dsDNA
TRINITY_DN5200_c0_g1_i66	YP_010780309.1	1765	25.558	403	262	12	518	1702	1119	1491	4.49e-11	69.7	NcpA [Tupanvirus deep ocean].	Tupanvirus deep ocean	Viruses;Varidnaviria;Bamfordvirae;Nucleocytoviricota;Megaviricetes;Imitervirales;Mimiviridae;Megamimivirinae;Tupanvirus.	Mimiviridae	dsDNA
TRINITY_DN54530_c0_g3_i3	YP_010789899.1	2811	31.343	402	244	12	398	1564	49	431	1.98e-44	175	HrpA-like helicase [Moumouvirus australiensis].	Moumouvirus australiensis	Viruses;Varidnaviria;Bamfordvirae;Nucleocytoviricota;Megaviricetes;Imitervirales;Mimiviridae;Megamimivirinae;Moumouvirus;Moumouvirusaustraliense.	Mimiviridae	dsDNA
TRINITY_DN5200_c0_g1_i38	YP_010789899.1	2679	31.343	402	244	12	398	1564	49	431	1.85e-44	174	HrpA-like helicase [Moumouvirus australiensis].	Moumouvirus australiensis	Viruses;Varidnaviria;Bamfordvirae;Nucleocytoviricota;Megaviricetes;Imitervirales;Mimiviridae;Megamimivirinae;Moumouvirus;Moumouvirusaustraliense.	Mimiviridae	dsDNA
TRINITY_DN5200_c0_g1_i25	YP_010789899.1	1853	31.343	402	244	12	398	1564	49	431	2.4e-45	174	HrpA-like helicase [Moumouvirus australiensis].	Moumouvirus australiensis	Viruses;Varidnaviria;Bamfordvirae;Nucleocytoviricota;Megaviricetes;Imitervirales;Mimiviridae;Megamimivirinae;Moumouvirus;Moumouvirusaustraliense.	Mimiviridae	dsDNA
TRINITY_DN78792_c1_g1_i8	YP_001497214.1	1378	26.866	402	259	11	17	1189	10	387	6.98e-25	110	hypothetical protein NY2A_B018L [Paramecium bursaria Chlorellavirus NY2A].	Paramecium bursaria Chlorella virus NY2A	Viruses;Varidnaviria;Bamfordvirae;Nucleocytoviricota;Megaviricetes;Algavirales;Phycodnaviridae;Chlorovirus.	Phycodnaviridae	dsDNA
TRINITY_DN78792_c1_g1_i1	YP_009664587.1	6271	24.688	401	241	12	4785	3592	57	399	1.59e-27	120	ORF47 [white sturgeon herpesvirus 2].	white sturgeon herpesvirus 2	Viruses;Duplodnaviria;Heunggongvirae;Peploviricota;Herviviricetes;Herpesvirales;Alloherpesviridae;Ictavirus;Ictavirusacipenseridallo2.	Alloherpesviridae	dsDNA
TRINITY_DN3013_c0_g1_i14	YP_009664587.1	4919	24.688	401	241	12	3433	2240	57	399	1.18e-27	120	ORF47 [white sturgeon herpesvirus 2].	white sturgeon herpesvirus 2	Viruses;Duplodnaviria;Heunggongvirae;Peploviricota;Herviviricetes;Herpesvirales;Alloherpesviridae;Ictavirus;Ictavirusacipenseridallo2.	Alloherpesviridae	dsDNA
TRINITY_DN5200_c0_g1_i42	YP_009664587.1	4097	24.688	401	241	12	2611	1418	57	399	9.4e-28	120	ORF47 [white sturgeon herpesvirus 2].	white sturgeon herpesvirus 2	Viruses;Duplodnaviria;Heunggongvirae;Peploviricota;Herviviricetes;Herpesvirales;Alloherpesviridae;Ictavirus;Ictavirusacipenseridallo2.	Alloherpesviridae	dsDNA
TRINITY_DN5200_c0_g1_i55	YP_010803506.1	3552	25.436	401	199	13	1649	666	36	409	1.76e-22	105	serinethreonine-protein kinase [Fadolivirus algeromassiliense].	Fadolivirus algeromassiliense	Viruses;Varidnaviria;Bamfordvirae;Nucleocytoviricota;Megaviricetes;Imitervirales;Mimiviridae;Klosneuvirinae;Fadolivirus.	Mimiviridae	dsDNA
TRINITY_DN78792_c1_g1_i13	YP_010803506.1	3535	25.436	401	199	13	1632	649	36	409	1.54e-22	105	serinethreonine-protein kinase [Fadolivirus algeromassiliense].	Fadolivirus algeromassiliense	Viruses;Varidnaviria;Bamfordvirae;Nucleocytoviricota;Megaviricetes;Imitervirales;Mimiviridae;Klosneuvirinae;Fadolivirus.	Mimiviridae	dsDNA
TRINITY_DN5200_c0_g1_i1	YP_009665578.1	3523	29.676	401	267	10	1845	3035	450	839	5.53e-41	167	ATPase [Paramecium bursaria Chlorella virus NYs1].	Paramecium bursaria Chlorella virus NYs1	Viruses;Varidnaviria;Bamfordvirae;Nucleocytoviricota;Megaviricetes;Algavirales;Phycodnaviridae;Chlorovirus.	Phycodnaviridae	dsDNA
TRINITY_DN3453_c0_g1_i21	YP_010803506.1	3305	25.436	401	199	13	1402	419	36	409	1.59e-22	105	serinethreonine-protein kinase [Fadolivirus algeromassiliense].	Fadolivirus algeromassiliense	Viruses;Varidnaviria;Bamfordvirae;Nucleocytoviricota;Megaviricetes;Imitervirales;Mimiviridae;Klosneuvirinae;Fadolivirus.	Mimiviridae	dsDNA
TRINITY_DN78792_c1_g1_i15	YP_009664587.1	2993	24.688	401	241	12	1507	314	57	399	5.33e-28	120	ORF47 [white sturgeon herpesvirus 2].	white sturgeon herpesvirus 2	Viruses;Duplodnaviria;Heunggongvirae;Peploviricota;Herviviricetes;Herpesvirales;Alloherpesviridae;Ictavirus;Ictavirusacipenseridallo2.	Alloherpesviridae	dsDNA
TRINITY_DN5638_c0_g1_i5	YP_010780309.1	2094	21.197	401	243	17	2012	882	1135	1486	1.22e-06	55.8	NcpA [Tupanvirus deep ocean].	Tupanvirus deep ocean	Viruses;Varidnaviria;Bamfordvirae;Nucleocytoviricota;Megaviricetes;Imitervirales;Mimiviridae;Megamimivirinae;Tupanvirus.	Mimiviridae	dsDNA
TRINITY_DN14018_c0_g1_i1	YP_009448636.1	1843	23.691	401	263	13	273	1445	76	443	8.19e-24	108	Cytochrome P450-like protein E-class [Orpheovirus IHUMI-LCC2].	Orpheovirus IHUMI-LCC2	Viruses;Varidnaviria;Bamfordvirae;Nucleocytoviricota;Megaviricetes;Algavirales;Phycodnaviridae.	Phycodnaviridae	dsDNA
TRINITY_DN3660_c0_g1_i2	YP_001427077.1	1829	27.93	401	200	19	1725	655	52	407	3.13e-21	101	Holliday junction branch migration helicase [Chlorovirusheliozoae].	Chlorovirus heliozoae	Viruses;Varidnaviria;Bamfordvirae;Nucleocytoviricota;Megaviricetes;Algavirales;Phycodnaviridae;Chlorovirus.	Phycodnaviridae	dsDNA
TRINITY_DN3660_c0_g1_i14	YP_010803676.1	1770	37.157	401	229	5	350	1552	15	392	3.47e-91	300	valyl-tRNA synthetase [Fadolivirus algeromassiliense].	Fadolivirus algeromassiliense	Viruses;Varidnaviria;Bamfordvirae;Nucleocytoviricota;Megaviricetes;Imitervirales;Mimiviridae;Klosneuvirinae;Fadolivirus.	Mimiviridae	dsDNA
TRINITY_DN323229_c0_g1_i1	YP_001427077.1	1697	27.93	401	200	19	1593	523	52	407	4.16e-21	100	Holliday junction branch migration helicase [Chlorovirusheliozoae].	Chlorovirus heliozoae	Viruses;Varidnaviria;Bamfordvirae;Nucleocytoviricota;Megaviricetes;Algavirales;Phycodnaviridae;Chlorovirus.	Phycodnaviridae	dsDNA
TRINITY_DN491425_c0_g1_i2	YP_010796961.1	5111	42	400	208	8	2032	890	791	1185	1.24e-164	270	PolB [Mayetiola barley midge adintovirus].	Mayetiola barley midge adintovirus	Viruses;Varidnaviria;Bamfordvirae;Preplasmiviricota;Polintoviricetes;Orthopolintovirales;Adintoviridae;Alphadintovirus;Alphadintovirusmayetiola.	Adintoviridae	dsDNA
TRINITY_DN27611_c0_g1_i4	YP_010796969.1	3770	35	400	242	8	1446	2612	4	396	4.47e-68	238	hexon [Mayetiola barley midge adintovirus].	Mayetiola barley midge adintovirus	Viruses;Varidnaviria;Bamfordvirae;Preplasmiviricota;Polintoviricetes;Orthopolintovirales;Adintoviridae;Alphadintovirus;Alphadintovirusmayetiola.	Adintoviridae	dsDNA
TRINITY_DN1438_c1_g1_i14	YP_010796969.1	3734	35	400	242	8	1446	2612	4	396	4.31e-68	238	hexon [Mayetiola barley midge adintovirus].	Mayetiola barley midge adintovirus	Viruses;Varidnaviria;Bamfordvirae;Preplasmiviricota;Polintoviricetes;Orthopolintovirales;Adintoviridae;Alphadintovirus;Alphadintovirusmayetiola.	Adintoviridae	dsDNA
TRINITY_DN27611_c0_g1_i1	YP_010796969.1	3726	35	400	242	8	1446	2612	4	396	4.27e-68	238	hexon [Mayetiola barley midge adintovirus].	Mayetiola barley midge adintovirus	Viruses;Varidnaviria;Bamfordvirae;Preplasmiviricota;Polintoviricetes;Orthopolintovirales;Adintoviridae;Alphadintovirus;Alphadintovirusmayetiola.	Adintoviridae	dsDNA
TRINITY_DN610_c0_g1_i16	YP_010796969.1	3114	35	400	242	8	1446	2612	4	396	1.47e-68	238	hexon [Mayetiola barley midge adintovirus].	Mayetiola barley midge adintovirus	Viruses;Varidnaviria;Bamfordvirae;Preplasmiviricota;Polintoviricetes;Orthopolintovirales;Adintoviridae;Alphadintovirus;Alphadintovirusmayetiola.	Adintoviridae	dsDNA
TRINITY_DN610_c0_g1_i10	YP_010803516.1	2626	28.75	400	261	15	1566	397	2	387	5.21e-31	132	bifunctional sulfate adenylyltransferaseadenylylsulfate kinase[Fadolivirus algeromassiliense].	Fadolivirus algeromassiliense	Viruses;Varidnaviria;Bamfordvirae;Nucleocytoviricota;Megaviricetes;Imitervirales;Mimiviridae;Klosneuvirinae;Fadolivirus.	Mimiviridae	dsDNA
TRINITY_DN172438_c0_g1_i1	YP_010796969.1	2562	35	400	242	8	282	1448	4	396	2.06e-69	238	hexon [Mayetiola barley midge adintovirus].	Mayetiola barley midge adintovirus	Viruses;Varidnaviria;Bamfordvirae;Preplasmiviricota;Polintoviricetes;Orthopolintovirales;Adintoviridae;Alphadintovirus;Alphadintovirusmayetiola.	Adintoviridae	dsDNA
TRINITY_DN7290_c0_g1_i4	YP_010803516.1	2526	28.75	400	261	15	1566	397	2	387	5.17e-31	132	bifunctional sulfate adenylyltransferaseadenylylsulfate kinase[Fadolivirus algeromassiliense].	Fadolivirus algeromassiliense	Viruses;Varidnaviria;Bamfordvirae;Nucleocytoviricota;Megaviricetes;Imitervirales;Mimiviridae;Klosneuvirinae;Fadolivirus.	Mimiviridae	dsDNA
TRINITY_DN43369_c0_g2_i7	YP_009666148.1	2411	26.5	400	218	9	133	1314	19	348	1.37e-32	133	hypothetical protein FLA14_p101 [Diachasmimorpha longicaudataentomopoxvirus].	Diachasmimorpha longicaudata entomopoxvirus	Viruses;Varidnaviria;Bamfordvirae;Nucleocytoviricota;Pokkesviricetes;Chitovirales;Poxviridae;Entomopoxvirinae;Diachasmimorphaentomopoxvirus.	Poxviridae	dsDNA
TRINITY_DN335_c0_g1_i39	YP_010780259.1	2210	27.5	400	224	17	2067	1006	125	504	5.38e-32	135	glycosyl hydrolase family 18 [Tupanvirus deep ocean].	Tupanvirus deep ocean	Viruses;Varidnaviria;Bamfordvirae;Nucleocytoviricota;Megaviricetes;Imitervirales;Mimiviridae;Megamimivirinae;Tupanvirus.	Mimiviridae	dsDNA
TRINITY_DN1409_c0_g1_i5	YP_010796961.1	1975	42	400	208	8	1391	249	791	1185	2.08e-130	270	PolB [Mayetiola barley midge adintovirus].	Mayetiola barley midge adintovirus	Viruses;Varidnaviria;Bamfordvirae;Preplasmiviricota;Polintoviricetes;Orthopolintovirales;Adintoviridae;Alphadintovirus;Alphadintovirusmayetiola.	Adintoviridae	dsDNA
TRINITY_DN1409_c0_g1_i13	YP_009448636.1	1889	24.5	400	233	12	517	1689	106	445	2.45e-25	113	Cytochrome P450-like protein E-class [Orpheovirus IHUMI-LCC2].	Orpheovirus IHUMI-LCC2	Viruses;Varidnaviria;Bamfordvirae;Nucleocytoviricota;Megaviricetes;Algavirales;Phycodnaviridae.	Phycodnaviridae	dsDNA
TRINITY_DN1894_c0_g1_i16	YP_010780181.1	1671	34	400	236	9	437	1606	3	384	1.73e-55	203	hypothetical protein QJ856_gp1184 [Tupanvirus deep ocean].	Tupanvirus deep ocean	Viruses;Varidnaviria;Bamfordvirae;Nucleocytoviricota;Megaviricetes;Imitervirales;Mimiviridae;Megamimivirinae;Tupanvirus.	Mimiviridae	dsDNA
TRINITY_DN17322_c0_g1_i11	YP_010780817.1	4224	23.81	399	230	12	696	1709	5	390	1.85e-14	81.6	arylsulfatase [Tupanvirus deep ocean].	Tupanvirus deep ocean	Viruses;Varidnaviria;Bamfordvirae;Nucleocytoviricota;Megaviricetes;Imitervirales;Mimiviridae;Megamimivirinae;Tupanvirus.	Mimiviridae	dsDNA
TRINITY_DN5346_c0_g1_i12	YP_010780817.1	3928	23.81	399	230	12	696	1709	5	390	1.68e-14	81.6	arylsulfatase [Tupanvirus deep ocean].	Tupanvirus deep ocean	Viruses;Varidnaviria;Bamfordvirae;Nucleocytoviricota;Megaviricetes;Imitervirales;Mimiviridae;Megamimivirinae;Tupanvirus.	Mimiviridae	dsDNA
TRINITY_DN17322_c0_g1_i9	YP_009173589.1	3744	30.075	399	235	11	321	1481	25	391	1.59e-43	167	Helicase 45 [Chrysochromulina ericina virus].	Chrysochromulina ericina virus	Viruses;Varidnaviria;Bamfordvirae;Nucleocytoviricota;Megaviricetes;Algavirales;Phycodnaviridae.	Phycodnaviridae	dsDNA
TRINITY_DN1805_c1_g1_i21	YP_009173589.1	3744	30.075	399	235	11	321	1481	25	391	1.59e-43	167	Helicase 45 [Chrysochromulina ericina virus].	Chrysochromulina ericina virus	Viruses;Varidnaviria;Bamfordvirae;Nucleocytoviricota;Megaviricetes;Algavirales;Phycodnaviridae.	Phycodnaviridae	dsDNA
TRINITY_DN4295_c0_g1_i2	YP_009352567.1	2979	30.827	399	209	11	1167	124	60	442	4.51e-41	162	Peroxinectin [Kaumoebavirus].	Kaumoebavirus	Viruses.	Viruses	unclassified viruses
TRINITY_DN4295_c0_g1_i6	YP_009173589.1	3725	28.07	399	247	5	2368	3555	32	393	5.78e-49	182	Helicase 45 [Chrysochromulina ericina virus].	Chrysochromulina ericina virus	Viruses;Varidnaviria;Bamfordvirae;Nucleocytoviricota;Megaviricetes;Algavirales;Phycodnaviridae.	Phycodnaviridae	dsDNA
TRINITY_DN4295_c0_g1_i13	YP_010789874.1	2653	29.323	399	230	17	2132	990	388	752	2.46e-31	135	SAM-dependent methyltransferase [Moumouvirus australiensis].	Moumouvirus australiensis	Viruses;Varidnaviria;Bamfordvirae;Nucleocytoviricota;Megaviricetes;Imitervirales;Mimiviridae;Megamimivirinae;Moumouvirus;Moumouvirusaustraliense.	Mimiviridae	dsDNA
TRINITY_DN4295_c0_g1_i11	YP_010789874.1	2633	29.323	399	230	17	2112	970	388	752	2.41e-31	135	SAM-dependent methyltransferase [Moumouvirus australiensis].	Moumouvirus australiensis	Viruses;Varidnaviria;Bamfordvirae;Nucleocytoviricota;Megaviricetes;Imitervirales;Mimiviridae;Megamimivirinae;Moumouvirus;Moumouvirusaustraliense.	Mimiviridae	dsDNA
TRINITY_DN4733_c0_g1_i16	YP_010781991.1	1513	37.845	399	228	7	1311	157	200	592	1.69e-73	247	hypothetical protein QJ857_gp0716 [Tupanvirus soda lake].	Tupanvirus soda lake	Viruses;Varidnaviria;Bamfordvirae;Nucleocytoviricota;Megaviricetes;Imitervirales;Mimiviridae;Megamimivirinae;Tupanvirus.	Mimiviridae	dsDNA
TRINITY_DN335_c0_g1_i13	YP_009116977.1	1442	29.574	399	211	19	1171	146	146	531	1.79e-37	147	chitinase [Pseudoplusia includens SNPV IE].	Pseudoplusia includens SNPV IE	Viruses;Naldaviricetes;Lefavirales;Baculoviridae;Alphabaculovirus;Alphabaculovirusalterchrincludentis.	Baculoviridae	dsDNA
TRINITY_DN335_c0_g1_i16	NP_612245.1	6926	25.879	398	213	20	6034	4961	225	580	1.5	37.7	ORF023R [Infectious spleen and kidney necrosis virus].	Infectious spleen and kidney necrosis virus	Viruses;Varidnaviria;Bamfordvirae;Nucleocytoviricota;Megaviricetes;Pimascovirales;Iridoviridae;Alphairidovirinae;Megalocytivirus.	Iridoviridae	dsDNA
TRINITY_DN52678_c0_g1_i1	NP_612245.1	6344	25.879	398	213	20	6034	4961	225	580	5.9	35.8	ORF023R [Infectious spleen and kidney necrosis virus].	Infectious spleen and kidney necrosis virus	Viruses;Varidnaviria;Bamfordvirae;Nucleocytoviricota;Megaviricetes;Pimascovirales;Iridoviridae;Alphairidovirinae;Megalocytivirus.	Iridoviridae	dsDNA
TRINITY_DN335_c0_g1_i18	NP_612245.1	5184	22.864	398	222	16	3160	2138	167	536	0.91	38.1	ORF023R [Infectious spleen and kidney necrosis virus].	Infectious spleen and kidney necrosis virus	Viruses;Varidnaviria;Bamfordvirae;Nucleocytoviricota;Megaviricetes;Pimascovirales;Iridoviridae;Alphairidovirinae;Megalocytivirus.	Iridoviridae	dsDNA
TRINITY_DN335_c0_g1_i15	NP_612245.1	5041	22.864	398	222	16	2319	1297	167	536	0.82	38.1	ORF023R [Infectious spleen and kidney necrosis virus].	Infectious spleen and kidney necrosis virus	Viruses;Varidnaviria;Bamfordvirae;Nucleocytoviricota;Megaviricetes;Pimascovirales;Iridoviridae;Alphairidovirinae;Megalocytivirus.	Iridoviridae	dsDNA
TRINITY_DN3660_c0_g1_i8	YP_009165762.1	1776	29.899	398	224	16	1458	331	43	407	7.31e-25	112	hypothetical protein APL35_gp011 [Apis mellifera filamentousvirus].	Apis mellifera filamentous virus	Viruses.	Viruses	unclassified viruses
TRINITY_DN258565_c0_g1_i1	YP_009352567.1	2099	30.151	398	201	12	923	1954	68	442	1.71e-26	117	Peroxinectin [Kaumoebavirus].	Kaumoebavirus	Viruses.	Viruses	unclassified viruses
TRINITY_DN1195_c1_g1_i1	YP_009041983.1	3013	50	398	186	8	1039	2205	11	404	2.09e-120	378	ornithine decarboxylase [Bovine gammaherpesvirus 6].	Bovine gammaherpesvirus 6	Viruses;Duplodnaviria;Heunggongvirae;Peploviricota;Herviviricetes;Herpesvirales;Orthoherpesviridae;Gammaherpesvirinae;Macavirus;Macavirusbovinegamma6.	Orthoherpesviridae	dsDNA
TRINITY_DN232_c0_g1_i12	YP_009041983.1	2850	50	398	186	8	876	2042	11	404	6.26e-121	378	ornithine decarboxylase [Bovine gammaherpesvirus 6].	Bovine gammaherpesvirus 6	Viruses;Duplodnaviria;Heunggongvirae;Peploviricota;Herviviricetes;Herpesvirales;Orthoherpesviridae;Gammaherpesvirinae;Macavirus;Macavirusbovinegamma6.	Orthoherpesviridae	dsDNA
TRINITY_DN232_c0_g1_i14	YP_009041983.1	2784	50	398	186	8	810	1976	11	404	3.79e-121	378	ornithine decarboxylase [Bovine gammaherpesvirus 6].	Bovine gammaherpesvirus 6	Viruses;Duplodnaviria;Heunggongvirae;Peploviricota;Herviviricetes;Herpesvirales;Orthoherpesviridae;Gammaherpesvirinae;Macavirus;Macavirusbovinegamma6.	Orthoherpesviridae	dsDNA
TRINITY_DN232_c0_g1_i7	YP_009041983.1	2779	50	398	186	8	805	1971	11	404	3.71e-121	378	ornithine decarboxylase [Bovine gammaherpesvirus 6].	Bovine gammaherpesvirus 6	Viruses;Duplodnaviria;Heunggongvirae;Peploviricota;Herviviricetes;Herpesvirales;Orthoherpesviridae;Gammaherpesvirinae;Macavirus;Macavirusbovinegamma6.	Orthoherpesviridae	dsDNA
TRINITY_DN232_c0_g1_i3	YP_009041983.1	2676	50	398	186	8	702	1868	11	404	1.63e-121	378	ornithine decarboxylase [Bovine gammaherpesvirus 6].	Bovine gammaherpesvirus 6	Viruses;Duplodnaviria;Heunggongvirae;Peploviricota;Herviviricetes;Herpesvirales;Orthoherpesviridae;Gammaherpesvirinae;Macavirus;Macavirusbovinegamma6.	Orthoherpesviridae	dsDNA
TRINITY_DN1_c1_g1_i1	YP_009041983.1	2668	50	398	186	8	694	1860	11	404	1.55e-121	378	ornithine decarboxylase [Bovine gammaherpesvirus 6].	Bovine gammaherpesvirus 6	Viruses;Duplodnaviria;Heunggongvirae;Peploviricota;Herviviricetes;Herpesvirales;Orthoherpesviridae;Gammaherpesvirinae;Macavirus;Macavirusbovinegamma6.	Orthoherpesviridae	dsDNA
TRINITY_DN1_c1_g1_i6	YP_009041983.1	2565	50	398	186	8	591	1757	11	404	6.61e-122	378	ornithine decarboxylase [Bovine gammaherpesvirus 6].	Bovine gammaherpesvirus 6	Viruses;Duplodnaviria;Heunggongvirae;Peploviricota;Herviviricetes;Herpesvirales;Orthoherpesviridae;Gammaherpesvirinae;Macavirus;Macavirusbovinegamma6.	Orthoherpesviridae	dsDNA
TRINITY_DN1_c1_g1_i13	YP_010804038.1	1863	28.643	398	233	13	1443	379	42	431	1.05e-20	98.6	L-lysine 6-transaminase [Fadolivirus algeromassiliense].	Fadolivirus algeromassiliense	Viruses;Varidnaviria;Bamfordvirae;Nucleocytoviricota;Megaviricetes;Imitervirales;Mimiviridae;Klosneuvirinae;Fadolivirus.	Mimiviridae	dsDNA
TRINITY_DN1_c1_g1_i4	YP_010804038.1	1812	28.643	398	233	13	1443	379	42	431	8.05e-21	99	L-lysine 6-transaminase [Fadolivirus algeromassiliense].	Fadolivirus algeromassiliense	Viruses;Varidnaviria;Bamfordvirae;Nucleocytoviricota;Megaviricetes;Imitervirales;Mimiviridae;Klosneuvirinae;Fadolivirus.	Mimiviridae	dsDNA
TRINITY_DN52018_c0_g2_i1	YP_010804038.1	1784	28.643	398	233	13	1443	379	42	431	9.45e-21	98.6	L-lysine 6-transaminase [Fadolivirus algeromassiliense].	Fadolivirus algeromassiliense	Viruses;Varidnaviria;Bamfordvirae;Nucleocytoviricota;Megaviricetes;Imitervirales;Mimiviridae;Klosneuvirinae;Fadolivirus.	Mimiviridae	dsDNA
TRINITY_DN1288_c0_g1_i23	YP_010803248.1	1778	31.156	398	249	8	1213	35	49	426	2.36e-46	179	DNA-directed DNA polymerase family B [Fadolivirusalgeromassiliense].	Fadolivirus algeromassiliense	Viruses;Varidnaviria;Bamfordvirae;Nucleocytoviricota;Megaviricetes;Imitervirales;Mimiviridae;Klosneuvirinae;Fadolivirus.	Mimiviridae	dsDNA
TRINITY_DN948_c17_g1_i4	YP_010804038.1	1753	28.643	398	233	13	1443	379	42	431	9.07e-21	98.6	L-lysine 6-transaminase [Fadolivirus algeromassiliense].	Fadolivirus algeromassiliense	Viruses;Varidnaviria;Bamfordvirae;Nucleocytoviricota;Megaviricetes;Imitervirales;Mimiviridae;Klosneuvirinae;Fadolivirus.	Mimiviridae	dsDNA
TRINITY_DN3274_c0_g1_i11	YP_010780186.1	1740	39.95	398	180	7	473	1627	5	356	1.82e-88	280	phenylalanyl tRNA-synthetase [Tupanvirus deep ocean].	Tupanvirus deep ocean	Viruses;Varidnaviria;Bamfordvirae;Nucleocytoviricota;Megaviricetes;Imitervirales;Mimiviridae;Megamimivirinae;Tupanvirus.	Mimiviridae	dsDNA
TRINITY_DN3274_c0_g1_i34	YP_010804038.1	1653	28.643	398	233	13	1443	379	42	431	6.98e-21	99	L-lysine 6-transaminase [Fadolivirus algeromassiliense].	Fadolivirus algeromassiliense	Viruses;Varidnaviria;Bamfordvirae;Nucleocytoviricota;Megaviricetes;Imitervirales;Mimiviridae;Klosneuvirinae;Fadolivirus.	Mimiviridae	dsDNA
TRINITY_DN3274_c0_g1_i5	YP_010780186.1	1515	39.95	398	180	7	248	1402	5	356	3.33e-89	280	phenylalanyl tRNA-synthetase [Tupanvirus deep ocean].	Tupanvirus deep ocean	Viruses;Varidnaviria;Bamfordvirae;Nucleocytoviricota;Megaviricetes;Imitervirales;Mimiviridae;Megamimivirinae;Tupanvirus.	Mimiviridae	dsDNA
TRINITY_DN3274_c0_g1_i42	YP_010780186.1	1473	39.95	398	180	7	206	1360	5	356	2.62e-89	280	phenylalanyl tRNA-synthetase [Tupanvirus deep ocean].	Tupanvirus deep ocean	Viruses;Varidnaviria;Bamfordvirae;Nucleocytoviricota;Megaviricetes;Imitervirales;Mimiviridae;Megamimivirinae;Tupanvirus.	Mimiviridae	dsDNA
TRINITY_DN42859_c1_g1_i1	YP_010789287.1	4649	28.463	397	209	13	67	1044	138	530	4.81e-25	115	ankyrin repeat protein [Megavirus baoshan].	Megavirus baoshan	Viruses;Varidnaviria;Bamfordvirae;Nucleocytoviricota;Megaviricetes;Imitervirales;Mimiviridae;Megamimivirinae;Megavirus;Megavirusbaoshanense.	Mimiviridae	dsDNA
TRINITY_DN1741_c2_g1_i2	YP_009165762.1	4938	27.456	397	247	13	308	1423	43	423	1.14e-30	132	hypothetical protein APL35_gp011 [Apis mellifera filamentousvirus].	Apis mellifera filamentous virus	Viruses.	Viruses	unclassified viruses
TRINITY_DN38679_c0_g1_i7	YP_009165762.1	4845	27.456	397	247	13	214	1329	43	423	1.11e-30	132	hypothetical protein APL35_gp011 [Apis mellifera filamentousvirus].	Apis mellifera filamentous virus	Viruses.	Viruses	unclassified viruses
TRINITY_DN7656_c0_g1_i11	YP_009165762.1	4573	27.456	397	247	13	308	1423	43	423	1.03e-30	132	hypothetical protein APL35_gp011 [Apis mellifera filamentousvirus].	Apis mellifera filamentous virus	Viruses.	Viruses	unclassified viruses
TRINITY_DN1077_c0_g1_i11	YP_009165762.1	4479	27.456	397	247	13	214	1329	43	423	9.98e-31	132	hypothetical protein APL35_gp011 [Apis mellifera filamentousvirus].	Apis mellifera filamentous virus	Viruses.	Viruses	unclassified viruses
TRINITY_DN13452_c0_g1_i11	YP_009165762.1	4364	27.456	397	247	13	214	1329	43	423	9.61e-31	132	hypothetical protein APL35_gp011 [Apis mellifera filamentousvirus].	Apis mellifera filamentous virus	Viruses.	Viruses	unclassified viruses
TRINITY_DN13452_c0_g1_i13	YP_009177033.1	3387	29.975	397	236	14	3220	2084	112	484	9.63e-42	168	alkaline phosphodiesterase [Turkeypox virus].	Turkeypox virus	Viruses;Varidnaviria;Bamfordvirae;Nucleocytoviricota;Pokkesviricetes;Chitovirales;Poxviridae;Chordopoxvirinae;Avipoxvirus.	Poxviridae	dsDNA
TRINITY_DN13452_c0_g1_i8	YP_010780309.1	2094	21.662	397	247	16	1934	795	152	501	0.007	43.5	NcpA [Tupanvirus deep ocean].	Tupanvirus deep ocean	Viruses;Varidnaviria;Bamfordvirae;Nucleocytoviricota;Megaviricetes;Imitervirales;Mimiviridae;Megamimivirinae;Tupanvirus.	Mimiviridae	dsDNA
TRINITY_DN1295_c1_g1_i6	YP_009177033.1	1752	29.975	397	236	14	1585	449	112	484	1.79e-43	169	alkaline phosphodiesterase [Turkeypox virus].	Turkeypox virus	Viruses;Varidnaviria;Bamfordvirae;Nucleocytoviricota;Pokkesviricetes;Chitovirales;Poxviridae;Chordopoxvirinae;Avipoxvirus.	Poxviridae	dsDNA
TRINITY_DN13452_c0_g1_i9	YP_010780181.1	1336	25.945	397	240	14	91	1206	106	473	7.36e-22	102	hypothetical protein QJ856_gp1184 [Tupanvirus deep ocean].	Tupanvirus deep ocean	Viruses;Varidnaviria;Bamfordvirae;Nucleocytoviricota;Megaviricetes;Imitervirales;Mimiviridae;Megamimivirinae;Tupanvirus.	Mimiviridae	dsDNA
TRINITY_DN7007_c0_g2_i1	YP_009342207.1	1309	45.592	397	158	9	44	1207	4	351	5.25e-101	318	AAA+ ATPase predicted domain [Lymphocystis disease virus Sa].	Lymphocystis disease virus Sa	Viruses;Varidnaviria;Bamfordvirae;Nucleocytoviricota;Megaviricetes;Pimascovirales;Iridoviridae;Alphairidovirinae;Lymphocystivirus.	Iridoviridae	dsDNA
TRINITY_DN5416_c0_g1_i2	NP_612245.1	6412	29.293	396	208	19	2869	3930	213	578	2.38e-17	92.4	ORF023R [Infectious spleen and kidney necrosis virus].	Infectious spleen and kidney necrosis virus	Viruses;Varidnaviria;Bamfordvirae;Nucleocytoviricota;Megaviricetes;Pimascovirales;Iridoviridae;Alphairidovirinae;Megalocytivirus.	Iridoviridae	dsDNA
TRINITY_DN1295_c1_g1_i3	NP_612245.1	6143	29.293	396	208	19	2600	3661	213	578	2.26e-17	92.4	ORF023R [Infectious spleen and kidney necrosis virus].	Infectious spleen and kidney necrosis virus	Viruses;Varidnaviria;Bamfordvirae;Nucleocytoviricota;Megaviricetes;Pimascovirales;Iridoviridae;Alphairidovirinae;Megalocytivirus.	Iridoviridae	dsDNA
TRINITY_DN33827_c0_g1_i1	YP_010796784.1	2865	24.747	396	231	14	1893	721	27	360	1.05e-21	103	putative gamma-glutamyl transpeptidase [Diachasmimorphalongicaudata entomopoxvirus].	Diachasmimorpha longicaudata entomopoxvirus	Viruses;Varidnaviria;Bamfordvirae;Nucleocytoviricota;Pokkesviricetes;Chitovirales;Poxviridae;Entomopoxvirinae;Diachasmimorphaentomopoxvirus.	Poxviridae	dsDNA
TRINITY_DN1163_c0_g1_i5	YP_010796784.1	2804	24.747	396	231	14	1893	721	27	360	1.02e-21	103	putative gamma-glutamyl transpeptidase [Diachasmimorphalongicaudata entomopoxvirus].	Diachasmimorpha longicaudata entomopoxvirus	Viruses;Varidnaviria;Bamfordvirae;Nucleocytoviricota;Pokkesviricetes;Chitovirales;Poxviridae;Entomopoxvirinae;Diachasmimorphaentomopoxvirus.	Poxviridae	dsDNA
TRINITY_DN1295_c1_g1_i1	YP_009173589.1	2510	31.061	396	249	6	179	1348	15	392	2.87e-53	193	Helicase 45 [Chrysochromulina ericina virus].	Chrysochromulina ericina virus	Viruses;Varidnaviria;Bamfordvirae;Nucleocytoviricota;Megaviricetes;Algavirales;Phycodnaviridae.	Phycodnaviridae	dsDNA
TRINITY_DN27611_c0_g1_i6	YP_008438242.1	2168	46.212	396	201	4	358	1530	12	400	2.47e-122	374	Tyrosine-tRNA ligase [Pandoravirus salinus].	Pandoravirus salinus	Viruses;Pandoravirus.	Pandoravirus	dsDNA
TRINITY_DN1295_c1_g1_i7	YP_008438242.1	1990	46.212	396	201	4	358	1530	12	400	4.6e-123	374	Tyrosine-tRNA ligase [Pandoravirus salinus].	Pandoravirus salinus	Viruses;Pandoravirus.	Pandoravirus	dsDNA
TRINITY_DN1291_c1_g4_i1	YP_008438242.1	1964	46.212	396	201	4	358	1530	12	400	3.54e-123	374	Tyrosine-tRNA ligase [Pandoravirus salinus].	Pandoravirus salinus	Viruses;Pandoravirus.	Pandoravirus	dsDNA
TRINITY_DN10258_c2_g1_i3	YP_009046239.1	1465	28.535	396	228	10	1203	25	19	362	8.52e-23	105	ankyrin repeat protein [Penguinpox virus].	Penguinpox virus	Viruses;Varidnaviria;Bamfordvirae;Nucleocytoviricota;Pokkesviricetes;Chitovirales;Poxviridae;Chordopoxvirinae;Avipoxvirus.	Poxviridae	dsDNA
TRINITY_DN10258_c2_g1_i4	NP_612245.1	7289	25.823	395	187	21	1408	500	197	577	0.044	42.7	ORF023R [Infectious spleen and kidney necrosis virus].	Infectious spleen and kidney necrosis virus	Viruses;Varidnaviria;Bamfordvirae;Nucleocytoviricota;Megaviricetes;Pimascovirales;Iridoviridae;Alphairidovirinae;Megalocytivirus.	Iridoviridae	dsDNA
TRINITY_DN5203_c1_g1_i1	NP_612245.1	6926	25.823	395	187	21	1408	500	197	577	0.042	42.7	ORF023R [Infectious spleen and kidney necrosis virus].	Infectious spleen and kidney necrosis virus	Viruses;Varidnaviria;Bamfordvirae;Nucleocytoviricota;Megaviricetes;Pimascovirales;Iridoviridae;Alphairidovirinae;Megalocytivirus.	Iridoviridae	dsDNA
TRINITY_DN57320_c0_g1_i2	NP_612245.1	6344	25.823	395	187	21	1408	500	197	577	0.038	42.7	ORF023R [Infectious spleen and kidney necrosis virus].	Infectious spleen and kidney necrosis virus	Viruses;Varidnaviria;Bamfordvirae;Nucleocytoviricota;Megaviricetes;Pimascovirales;Iridoviridae;Alphairidovirinae;Megalocytivirus.	Iridoviridae	dsDNA
TRINITY_DN13878_c0_g1_i5	YP_002321389.1	3499	41.772	395	209	7	2337	1165	9	386	4e-104	337	semaphorin-like protein [Oryctes rhinoceros nudivirus].	Oryctes rhinoceros nudivirus	Viruses;Naldaviricetes;Lefavirales;Nudiviridae;Alphanudivirus;Alphanudivirusoryrhinocerotis.	Nudiviridae	dsDNA
TRINITY_DN41699_c3_g1_i6	YP_009165762.1	2578	29.873	395	226	17	268	1377	24	392	1.37e-27	122	hypothetical protein APL35_gp011 [Apis mellifera filamentousvirus].	Apis mellifera filamentous virus	Viruses.	Viruses	unclassified viruses
TRINITY_DN13878_c0_g1_i9	YP_010778125.1	3312	26.582	395	218	9	1925	765	44	374	3.31e-30	131	putative ATP-dependent RNA helicase [Bodo saltans virus].	Bodo saltans virus	Viruses;Varidnaviria;Bamfordvirae;Nucleocytoviricota;Megaviricetes;Imitervirales;Mimiviridae;Klosneuvirinae;Theiavirus;Theiavirussalishense.	Mimiviridae	dsDNA
TRINITY_DN1396_c0_g1_i1	NP_570296.1	1843	25.823	395	254	9	1463	318	155	523	4.6e-32	134	SPV136 kelch-like protein [Swinepox virus].	Swinepox virus	Viruses;Varidnaviria;Bamfordvirae;Nucleocytoviricota;Pokkesviricetes;Chitovirales;Poxviridae;Chordopoxvirinae;Suipoxvirus.	Poxviridae	dsDNA
TRINITY_DN1396_c0_g1_i2	YP_010084515.1	1767	33.165	395	249	7	1376	216	6	393	1.76e-51	186	equilibrative nucleoside transporter 1 isoform X1 [Harp sealherpesvirus].	Harp seal herpesvirus	Viruses;Duplodnaviria;Heunggongvirae;Peploviricota;Herviviricetes;Herpesvirales;Orthoherpesviridae;Gammaherpesvirinae;Percavirus;Percavirusphocidgamma3.	Orthoherpesviridae	dsDNA
TRINITY_DN232_c0_g1_i6	YP_010084515.1	1658	33.165	395	249	7	1376	216	6	393	9.1e-52	186	equilibrative nucleoside transporter 1 isoform X1 [Harp sealherpesvirus].	Harp seal herpesvirus	Viruses;Duplodnaviria;Heunggongvirae;Peploviricota;Herviviricetes;Herpesvirales;Orthoherpesviridae;Gammaherpesvirinae;Percavirus;Percavirusphocidgamma3.	Orthoherpesviridae	dsDNA
TRINITY_DN6299_c0_g1_i11	YP_009448636.1	1280	24.304	395	247	14	1279	116	109	458	4.81e-25	110	Cytochrome P450-like protein E-class [Orpheovirus IHUMI-LCC2].	Orpheovirus IHUMI-LCC2	Viruses;Varidnaviria;Bamfordvirae;Nucleocytoviricota;Megaviricetes;Algavirales;Phycodnaviridae.	Phycodnaviridae	dsDNA
TRINITY_DN63_c0_g1_i1	YP_001883394.1	3125	22.081	394	271	9	1729	644	172	561	9.68e-17	88.6	hypothetical protein MdSGHV066 [Musca domestica salivary glandhypertrophy virus].	Musca domestica salivary gland hypertrophy virus	Viruses;Naldaviricetes;Lefavirales;Hytrosaviridae;Muscavirus;Muscavirusmusdomesticae.	Hytrosaviridae	dsDNA
TRINITY_DN1042_c2_g1_i6	YP_001883394.1	2965	22.081	394	271	9	1729	644	172	561	9.59e-17	88.6	hypothetical protein MdSGHV066 [Musca domestica salivary glandhypertrophy virus].	Musca domestica salivary gland hypertrophy virus	Viruses;Naldaviricetes;Lefavirales;Hytrosaviridae;Muscavirus;Muscavirusmusdomesticae.	Hytrosaviridae	dsDNA
TRINITY_DN1042_c2_g1_i2	YP_001883394.1	2938	22.081	394	271	9	1729	644	172	561	8.82e-17	88.6	hypothetical protein MdSGHV066 [Musca domestica salivary glandhypertrophy virus].	Musca domestica salivary gland hypertrophy virus	Viruses;Naldaviricetes;Lefavirales;Hytrosaviridae;Muscavirus;Muscavirusmusdomesticae.	Hytrosaviridae	dsDNA
TRINITY_DN258406_c0_g1_i1	YP_003986584.1	6314	26.209	393	222	12	3167	4273	185	533	7.2e-22	107	putative ankyrin repeat protein [Acanthamoeba polyphaga mimivirus].	Acanthamoeba polyphaga mimivirus	Viruses;Varidnaviria;Bamfordvirae;Nucleocytoviricota;Megaviricetes;Imitervirales;Mimiviridae;Megamimivirinae;Mimivirus;Mimivirusbradfordmassiliense.	Mimiviridae	dsDNA
TRINITY_DN19_c0_g1_i6	YP_003986584.1	4984	26.209	393	222	12	3167	4273	185	533	4.04e-22	107	putative ankyrin repeat protein [Acanthamoeba polyphaga mimivirus].	Acanthamoeba polyphaga mimivirus	Viruses;Varidnaviria;Bamfordvirae;Nucleocytoviricota;Megaviricetes;Imitervirales;Mimiviridae;Megamimivirinae;Mimivirus;Mimivirusbradfordmassiliense.	Mimiviridae	dsDNA
TRINITY_DN19_c0_g1_i2	YP_003986584.1	4198	26.209	393	222	12	2381	3487	185	533	3.17e-22	107	putative ankyrin repeat protein [Acanthamoeba polyphaga mimivirus].	Acanthamoeba polyphaga mimivirus	Viruses;Varidnaviria;Bamfordvirae;Nucleocytoviricota;Megaviricetes;Imitervirales;Mimiviridae;Megamimivirinae;Mimivirus;Mimivirusbradfordmassiliense.	Mimiviridae	dsDNA
TRINITY_DN19_c0_g1_i5	NP_042289.1	4167	34.86	393	215	8	1777	2877	146	523	5.05e-60	221	P68 protein [UR2 sarcoma virus].	UR2 sarcoma virus	Viruses;Riboviria;Pararnavirae;Artverviricota;Revtraviricetes;Ortervirales;Retroviridae;Orthoretrovirinae;Alpharetrovirus.	Retroviridae	ssRNA-RT
TRINITY_DN19_c0_g1_i1	YP_003986584.1	3974	26.209	393	222	12	2157	3263	185	533	2.91e-22	107	putative ankyrin repeat protein [Acanthamoeba polyphaga mimivirus].	Acanthamoeba polyphaga mimivirus	Viruses;Varidnaviria;Bamfordvirae;Nucleocytoviricota;Megaviricetes;Imitervirales;Mimiviridae;Megamimivirinae;Mimivirus;Mimivirusbradfordmassiliense.	Mimiviridae	dsDNA
TRINITY_DN38349_c2_g1_i2	NP_042289.1	3865	34.86	393	215	8	1475	2575	146	523	1.46e-59	219	P68 protein [UR2 sarcoma virus].	UR2 sarcoma virus	Viruses;Riboviria;Pararnavirae;Artverviricota;Revtraviricetes;Ortervirales;Retroviridae;Orthoretrovirinae;Alpharetrovirus.	Retroviridae	ssRNA-RT
TRINITY_DN208824_c0_g1_i1	YP_010803532.1	3373	50.636	393	174	3	223	1392	8	383	3.31e-113	374	eukaryotic translation elongation factor 2 [Fadolivirusalgeromassiliense].	Fadolivirus algeromassiliense	Viruses;Varidnaviria;Bamfordvirae;Nucleocytoviricota;Megaviricetes;Imitervirales;Mimiviridae;Klosneuvirinae;Fadolivirus.	Mimiviridae	dsDNA
TRINITY_DN41694_c0_g1_i13	NP_042289.1	3202	34.86	393	215	8	812	1912	146	523	7.44e-60	219	P68 protein [UR2 sarcoma virus].	UR2 sarcoma virus	Viruses;Riboviria;Pararnavirae;Artverviricota;Revtraviricetes;Ortervirales;Retroviridae;Orthoretrovirinae;Alpharetrovirus.	Retroviridae	ssRNA-RT
TRINITY_DN24912_c0_g1_i5	NP_042289.1	3138	34.86	393	215	8	748	1848	146	523	6.79e-60	219	P68 protein [UR2 sarcoma virus].	UR2 sarcoma virus	Viruses;Riboviria;Pararnavirae;Artverviricota;Revtraviricetes;Ortervirales;Retroviridae;Orthoretrovirinae;Alpharetrovirus.	Retroviridae	ssRNA-RT
TRINITY_DN1437_c0_g1_i12	YP_010778001.1	3093	25.445	393	242	13	59	1183	1	360	4.66e-23	109	putative nuclear export mediator factor NEMF-like protein [Bodosaltans virus].	Bodo saltans virus	Viruses;Varidnaviria;Bamfordvirae;Nucleocytoviricota;Megaviricetes;Imitervirales;Mimiviridae;Klosneuvirinae;Theiavirus;Theiavirussalishense.	Mimiviridae	dsDNA
TRINITY_DN1437_c0_g1_i8	YP_010796961.1	2322	40.967	393	204	11	2322	1177	492	867	8.28e-124	239	PolB [Mayetiola barley midge adintovirus].	Mayetiola barley midge adintovirus	Viruses;Varidnaviria;Bamfordvirae;Preplasmiviricota;Polintoviricetes;Orthopolintovirales;Adintoviridae;Alphadintovirus;Alphadintovirusmayetiola.	Adintoviridae	dsDNA
TRINITY_DN1437_c0_g1_i7	YP_010783088.1	2151	27.226	393	228	13	507	1580	3	372	3.55e-25	113	arylsulfatase [Tetraselmis virus 1].	Tetraselmis virus 1	Viruses;Varidnaviria;Bamfordvirae;Nucleocytoviricota;Megaviricetes;Imitervirales;Allomimiviridae;Oceanusvirus;Oceanusviruskaneohense.	Allomimiviridae	dsDNA
TRINITY_DN14055_c0_g1_i4	YP_010778001.1	2001	25.445	393	242	13	59	1183	1	360	3e-23	108	putative nuclear export mediator factor NEMF-like protein [Bodosaltans virus].	Bodo saltans virus	Viruses;Varidnaviria;Bamfordvirae;Nucleocytoviricota;Megaviricetes;Imitervirales;Mimiviridae;Klosneuvirinae;Theiavirus;Theiavirussalishense.	Mimiviridae	dsDNA
TRINITY_DN983_c0_g1_i1	YP_010783088.1	1911	27.481	393	227	14	267	1340	3	372	2.86e-25	113	arylsulfatase [Tetraselmis virus 1].	Tetraselmis virus 1	Viruses;Varidnaviria;Bamfordvirae;Nucleocytoviricota;Megaviricetes;Imitervirales;Allomimiviridae;Oceanusvirus;Oceanusviruskaneohense.	Allomimiviridae	dsDNA
TRINITY_DN983_c0_g1_i2	YP_009480832.1	1804	24.936	393	233	11	1281	223	127	497	5.28e-24	109	Cytochrome P450 [Pandoravirus macleodensis].	Pandoravirus macleodensis	Viruses;Pandoravirus.	Pandoravirus	dsDNA
TRINITY_DN11126_c4_g1_i1	YP_010796961.1	1147	40.967	393	204	11	1147	2	492	867	6.59e-69	238	PolB [Mayetiola barley midge adintovirus].	Mayetiola barley midge adintovirus	Viruses;Varidnaviria;Bamfordvirae;Preplasmiviricota;Polintoviricetes;Orthopolintovirales;Adintoviridae;Alphadintovirus;Alphadintovirusmayetiola.	Adintoviridae	dsDNA
TRINITY_DN87617_c0_g1_i2	YP_010796961.1	5852	28.061	392	230	12	3936	2863	109	482	1.03e-168	110	PolB [Mayetiola barley midge adintovirus].	Mayetiola barley midge adintovirus	Viruses;Varidnaviria;Bamfordvirae;Preplasmiviricota;Polintoviricetes;Orthopolintovirales;Adintoviridae;Alphadintovirus;Alphadintovirusmayetiola.	Adintoviridae	dsDNA
TRINITY_DN7673_c0_g1_i3	YP_010796961.1	5111	28.061	392	230	12	3935	2862	109	482	1.24e-164	110	PolB [Mayetiola barley midge adintovirus].	Mayetiola barley midge adintovirus	Viruses;Varidnaviria;Bamfordvirae;Preplasmiviricota;Polintoviricetes;Orthopolintovirales;Adintoviridae;Alphadintovirus;Alphadintovirusmayetiola.	Adintoviridae	dsDNA
TRINITY_DN983_c0_g1_i5	YP_654431.1	2380	55.612	392	162	4	1551	379	1	381	3.22e-151	451	unknown [Choristoneura fumiferana granulovirus].	Choristoneura fumiferana granulovirus	Viruses;Naldaviricetes;Lefavirales;Baculoviridae;Betabaculovirus;Betabaculoviruschofumiferanae.	Baculoviridae	dsDNA
TRINITY_DN2233_c0_g2_i1	YP_009448636.1	1935	23.469	392	269	10	630	1805	109	469	2.19e-19	95.1	Cytochrome P450-like protein E-class [Orpheovirus IHUMI-LCC2].	Orpheovirus IHUMI-LCC2	Viruses;Varidnaviria;Bamfordvirae;Nucleocytoviricota;Megaviricetes;Algavirales;Phycodnaviridae.	Phycodnaviridae	dsDNA
TRINITY_DN7042_c0_g1_i1	YP_010803170.1	1852	33.673	392	225	8	303	1400	13	395	9.2e-56	197	DnaJ chaperone protein [Fadolivirus algeromassiliense].	Fadolivirus algeromassiliense	Viruses;Varidnaviria;Bamfordvirae;Nucleocytoviricota;Megaviricetes;Imitervirales;Mimiviridae;Klosneuvirinae;Fadolivirus.	Mimiviridae	dsDNA
TRINITY_DN7042_c0_g1_i7	YP_010783629.1	1839	27.551	392	229	16	1493	357	2	351	2.08e-33	134	alpha-galactosidase [Tetraselmis virus 1].	Tetraselmis virus 1	Viruses;Varidnaviria;Bamfordvirae;Nucleocytoviricota;Megaviricetes;Imitervirales;Allomimiviridae;Oceanusvirus;Oceanusviruskaneohense.	Allomimiviridae	dsDNA
TRINITY_DN7042_c0_g1_i5	YP_010783629.1	1786	27.551	392	229	16	1493	357	2	351	1.96e-33	134	alpha-galactosidase [Tetraselmis virus 1].	Tetraselmis virus 1	Viruses;Varidnaviria;Bamfordvirae;Nucleocytoviricota;Megaviricetes;Imitervirales;Allomimiviridae;Oceanusvirus;Oceanusviruskaneohense.	Allomimiviridae	dsDNA
TRINITY_DN44_c1_g1_i14	YP_010783629.1	1728	27.551	392	229	16	1493	357	2	351	1.82e-33	134	alpha-galactosidase [Tetraselmis virus 1].	Tetraselmis virus 1	Viruses;Varidnaviria;Bamfordvirae;Nucleocytoviricota;Megaviricetes;Imitervirales;Allomimiviridae;Oceanusvirus;Oceanusviruskaneohense.	Allomimiviridae	dsDNA
TRINITY_DN44_c1_g1_i3	YP_010783629.1	1714	27.551	392	229	16	1493	357	2	351	1.74e-33	134	alpha-galactosidase [Tetraselmis virus 1].	Tetraselmis virus 1	Viruses;Varidnaviria;Bamfordvirae;Nucleocytoviricota;Megaviricetes;Imitervirales;Allomimiviridae;Oceanusvirus;Oceanusviruskaneohense.	Allomimiviridae	dsDNA
TRINITY_DN11854_c1_g1_i4	NP_612245.1	7150	26.087	391	198	20	4810	3839	214	580	0.006	45.8	ORF023R [Infectious spleen and kidney necrosis virus].	Infectious spleen and kidney necrosis virus	Viruses;Varidnaviria;Bamfordvirae;Nucleocytoviricota;Megaviricetes;Pimascovirales;Iridoviridae;Alphairidovirinae;Megalocytivirus.	Iridoviridae	dsDNA
TRINITY_DN118696_c0_g1_i1	NP_612245.1	4014	25.831	391	199	20	3409	2438	214	580	0.01	43.9	ORF023R [Infectious spleen and kidney necrosis virus].	Infectious spleen and kidney necrosis virus	Viruses;Varidnaviria;Bamfordvirae;Nucleocytoviricota;Megaviricetes;Pimascovirales;Iridoviridae;Alphairidovirinae;Megalocytivirus.	Iridoviridae	dsDNA
TRINITY_DN7959_c0_g1_i7	YP_009325865.1	3067	23.529	391	238	18	1684	578	133	484	0.007	43.9	ATPase [Only Syngen Nebraska virus 5].	Only Syngen Nebraska virus 5	Viruses;Varidnaviria;Bamfordvirae;Nucleocytoviricota;Megaviricetes;Algavirales;Phycodnaviridae;Chlorovirus.	Phycodnaviridae	dsDNA
TRINITY_DN12809_c0_g2_i12	NP_612245.1	1834	26.343	391	197	20	1591	620	214	580	0.14	38.9	ORF023R [Infectious spleen and kidney necrosis virus].	Infectious spleen and kidney necrosis virus	Viruses;Varidnaviria;Bamfordvirae;Nucleocytoviricota;Megaviricetes;Pimascovirales;Iridoviridae;Alphairidovirinae;Megalocytivirus.	Iridoviridae	dsDNA
TRINITY_DN12849_c0_g1_i8	YP_009448636.1	1767	27.877	391	214	16	378	1496	118	458	3.9e-18	90.9	Cytochrome P450-like protein E-class [Orpheovirus IHUMI-LCC2].	Orpheovirus IHUMI-LCC2	Viruses;Varidnaviria;Bamfordvirae;Nucleocytoviricota;Megaviricetes;Algavirales;Phycodnaviridae.	Phycodnaviridae	dsDNA
TRINITY_DN12849_c0_g1_i2	YP_010777393.1	1564	44.501	391	198	8	322	1461	2	384	3.04e-93	311	topoisomerase II [Acanthamoeba polyphaga mimivirus].	Acanthamoeba polyphaga mimivirus	Viruses;Varidnaviria;Bamfordvirae;Nucleocytoviricota;Megaviricetes;Imitervirales;Mimiviridae;Megamimivirinae;Mimivirus;Mimivirusbradfordmassiliense.	Mimiviridae	dsDNA
TRINITY_DN12849_c0_g1_i5	YP_010779190.1	3875	42.051	390	197	5	2551	1400	147	513	1.83e-102	295	topoisomerase 1b [Moumouvirus goulette].	Moumouvirus goulette	Viruses;Varidnaviria;Bamfordvirae;Nucleocytoviricota;Megaviricetes;Imitervirales;Mimiviridae;Megamimivirinae;Moumouvirus;Moumouvirusgoulettemassiliense.	Mimiviridae	dsDNA
TRINITY_DN7625_c0_g1_i1	YP_010778015.1	2756	45.128	390	208	2	1273	107	124	508	7.08e-97	323	translation initiation factor IF-2 [Bodo saltans virus].	Bodo saltans virus	Viruses;Varidnaviria;Bamfordvirae;Nucleocytoviricota;Megaviricetes;Imitervirales;Mimiviridae;Klosneuvirinae;Theiavirus;Theiavirussalishense.	Mimiviridae	dsDNA
TRINITY_DN232_c0_g1_i4	YP_009448636.1	1550	24.103	390	231	13	352	1452	71	418	1.23e-21	100	Cytochrome P450-like protein E-class [Orpheovirus IHUMI-LCC2].	Orpheovirus IHUMI-LCC2	Viruses;Varidnaviria;Bamfordvirae;Nucleocytoviricota;Megaviricetes;Algavirales;Phycodnaviridae.	Phycodnaviridae	dsDNA
TRINITY_DN232_c0_g1_i19	YP_010796961.1	2962	43.188	389	191	8	1540	2688	563	927	2.72e-109	296	PolB [Mayetiola barley midge adintovirus].	Mayetiola barley midge adintovirus	Viruses;Varidnaviria;Bamfordvirae;Preplasmiviricota;Polintoviricetes;Orthopolintovirales;Adintoviridae;Alphadintovirus;Alphadintovirusmayetiola.	Adintoviridae	dsDNA
TRINITY_DN7625_c0_g1_i7	YP_010796961.1	2958	43.445	389	190	8	1536	2684	563	927	5.25e-112	297	PolB [Mayetiola barley midge adintovirus].	Mayetiola barley midge adintovirus	Viruses;Varidnaviria;Bamfordvirae;Preplasmiviricota;Polintoviricetes;Orthopolintovirales;Adintoviridae;Alphadintovirus;Alphadintovirusmayetiola.	Adintoviridae	dsDNA
TRINITY_DN13006_c0_g1_i14	YP_611073.1	1336	25.45	389	255	9	1208	87	79	447	5.88e-32	130	global transactivator [Antheraea pernyi nucleopolyhedrovirus].	Antheraea pernyi nucleopolyhedrovirus	Viruses;Naldaviricetes;Lefavirales;Baculoviridae;Alphabaculovirus;Alphabaculovirusanpernyi.	Baculoviridae	dsDNA
TRINITY_DN18122_c0_g1_i2	YP_008059249.1	6674	32.732	388	196	12	189	1271	3	352	7.85e-45	170	carbamoyl phosphate synthase small subunit [Halogranum tailed virus1].	Halogranum tailed virus 1	Viruses;Duplodnaviria;Heunggongvirae;Uroviricota;Caudoviricetes;Thumleimavirales;Halomagnusviridae;Hagravirus;HagravirusHGTV1.	Halomagnusviridae	dsDNA
TRINITY_DN31109_c0_g1_i3	YP_008059249.1	5903	32.732	388	196	12	189	1271	3	352	6.82e-45	170	carbamoyl phosphate synthase small subunit [Halogranum tailed virus1].	Halogranum tailed virus 1	Viruses;Duplodnaviria;Heunggongvirae;Uroviricota;Caudoviricetes;Thumleimavirales;Halomagnusviridae;Hagravirus;HagravirusHGTV1.	Halomagnusviridae	dsDNA
TRINITY_DN7625_c0_g1_i9	YP_008059249.1	4289	32.732	388	196	12	189	1271	3	352	4.65e-45	170	carbamoyl phosphate synthase small subunit [Halogranum tailed virus1].	Halogranum tailed virus 1	Viruses;Duplodnaviria;Heunggongvirae;Uroviricota;Caudoviricetes;Thumleimavirales;Halomagnusviridae;Hagravirus;HagravirusHGTV1.	Halomagnusviridae	dsDNA
TRINITY_DN7311_c1_g1_i7	YP_008059249.1	3959	32.732	388	196	12	189	1271	3	352	4.21e-45	170	carbamoyl phosphate synthase small subunit [Halogranum tailed virus1].	Halogranum tailed virus 1	Viruses;Duplodnaviria;Heunggongvirae;Uroviricota;Caudoviricetes;Thumleimavirales;Halomagnusviridae;Hagravirus;HagravirusHGTV1.	Halomagnusviridae	dsDNA
TRINITY_DN9589_c0_g1_i11	YP_008059249.1	3232	32.732	388	196	12	189	1271	3	352	3.2e-45	170	carbamoyl phosphate synthase small subunit [Halogranum tailed virus1].	Halogranum tailed virus 1	Viruses;Duplodnaviria;Heunggongvirae;Uroviricota;Caudoviricetes;Thumleimavirales;Halomagnusviridae;Hagravirus;HagravirusHGTV1.	Halomagnusviridae	dsDNA
TRINITY_DN4329_c0_g1_i1	YP_010778125.1	2762	30.412	388	237	8	1387	2520	36	400	1.6e-45	178	putative ATP-dependent RNA helicase [Bodo saltans virus].	Bodo saltans virus	Viruses;Varidnaviria;Bamfordvirae;Nucleocytoviricota;Megaviricetes;Imitervirales;Mimiviridae;Klosneuvirinae;Theiavirus;Theiavirussalishense.	Mimiviridae	dsDNA
TRINITY_DN4329_c0_g1_i12	YP_009046239.1	2427	32.732	388	228	8	2034	916	27	396	7.04e-32	135	ankyrin repeat protein [Penguinpox virus].	Penguinpox virus	Viruses;Varidnaviria;Bamfordvirae;Nucleocytoviricota;Pokkesviricetes;Chitovirales;Poxviridae;Chordopoxvirinae;Avipoxvirus.	Poxviridae	dsDNA
TRINITY_DN166286_c0_g1_i6	YP_009329013.1	2408	26.546	388	244	13	1388	270	185	546	1.19e-21	104	serine-threonine kinase [Cedratvirus A11].	Cedratvirus A11	Viruses;Pithoviruses.	Pithoviruses	dsDNA
TRINITY_DN9589_c0_g1_i2	YP_009448636.1	1940	23.454	388	217	10	1481	339	106	420	3.49e-20	97.4	Cytochrome P450-like protein E-class [Orpheovirus IHUMI-LCC2].	Orpheovirus IHUMI-LCC2	Viruses;Varidnaviria;Bamfordvirae;Nucleocytoviricota;Megaviricetes;Algavirales;Phycodnaviridae.	Phycodnaviridae	dsDNA
TRINITY_DN9589_c0_g1_i6	YP_009329013.1	1589	25.258	388	244	14	120	1226	189	549	6.02e-15	81.6	serine-threonine kinase [Cedratvirus A11].	Cedratvirus A11	Viruses;Pithoviruses.	Pithoviruses	dsDNA
TRINITY_DN97026_c0_g2_i7	YP_010803819.1	4909	26.357	387	240	11	1315	158	271	613	5.65e-26	119	phosphatidylinositol kinase [Fadolivirus algeromassiliense].	Fadolivirus algeromassiliense	Viruses;Varidnaviria;Bamfordvirae;Nucleocytoviricota;Megaviricetes;Imitervirales;Mimiviridae;Klosneuvirinae;Fadolivirus.	Mimiviridae	dsDNA
TRINITY_DN4574_c0_g2_i1	YP_009165762.1	2745	29.716	387	222	15	2504	1422	31	393	1.07e-27	122	hypothetical protein APL35_gp011 [Apis mellifera filamentousvirus].	Apis mellifera filamentous virus	Viruses.	Viruses	unclassified viruses
TRINITY_DN2579_c0_g1_i10	YP_009165762.1	2497	29.716	387	222	15	2256	1174	31	393	8.86e-28	122	hypothetical protein APL35_gp011 [Apis mellifera filamentousvirus].	Apis mellifera filamentous virus	Viruses.	Viruses	unclassified viruses
TRINITY_DN79431_c0_g1_i9	YP_009177124.1	3195	23.773	387	219	13	1211	180	2	355	2.14e-05	52.4	ankyrin repeat family protein [Turkeypox virus].	Turkeypox virus	Viruses;Varidnaviria;Bamfordvirae;Nucleocytoviricota;Pokkesviricetes;Chitovirales;Poxviridae;Chordopoxvirinae;Avipoxvirus.	Poxviridae	dsDNA
TRINITY_DN79431_c0_g1_i10	YP_009666148.1	2862	31.008	387	237	5	890	2044	8	366	1.39e-54	197	hypothetical protein FLA14_p101 [Diachasmimorpha longicaudataentomopoxvirus].	Diachasmimorpha longicaudata entomopoxvirus	Viruses;Varidnaviria;Bamfordvirae;Nucleocytoviricota;Pokkesviricetes;Chitovirales;Poxviridae;Entomopoxvirinae;Diachasmimorphaentomopoxvirus.	Poxviridae	dsDNA
TRINITY_DN376_c0_g5_i1	YP_010780645.1	2158	47.545	387	194	5	1473	328	176	558	2.89e-115	365	catalase HPII [Tupanvirus deep ocean].	Tupanvirus deep ocean	Viruses;Varidnaviria;Bamfordvirae;Nucleocytoviricota;Megaviricetes;Imitervirales;Mimiviridae;Megamimivirinae;Tupanvirus.	Mimiviridae	dsDNA
TRINITY_DN98143_c2_g1_i3	YP_010803001.1	1759	33.85	387	218	9	1169	63	33	399	2.01e-49	181	aminotransferase class V [Fadolivirus algeromassiliense].	Fadolivirus algeromassiliense	Viruses;Varidnaviria;Bamfordvirae;Nucleocytoviricota;Megaviricetes;Imitervirales;Mimiviridae;Klosneuvirinae;Fadolivirus.	Mimiviridae	dsDNA
TRINITY_DN2020_c1_g1_i15	YP_001427077.1	7160	29.016	386	215	16	2647	1553	27	374	9.1e-27	122	Holliday junction branch migration helicase [Chlorovirusheliozoae].	Chlorovirus heliozoae	Viruses;Varidnaviria;Bamfordvirae;Nucleocytoviricota;Megaviricetes;Algavirales;Phycodnaviridae;Chlorovirus.	Phycodnaviridae	dsDNA
[truncated: 4,884 more rows]
